# Supplementary material for: Comparing the Biological Impact of Glatiramer Acetate with the Biological Impact of a Generic
Source: PubMed Central journal article supplement (PMC3885444; doi:10.1371/journal.pone.0083757), 2014-01-08
Supplement: pone.0083757.s012.pdf [file pone.0083757.s012.pdf]

| Probe        | Gene          | Var(generic)/Var(GA) |
|--------------|---------------|----------------------|
| ILMN_2635132 | FOXP3         | 4.169784637          |
| ILMN_2707941 | GPR83         | 4.141645173          |
| ILMN_2752702 | KLHL12        | 3.56612757           |
| ILMN_2741169 | CD8B1         | 3.455712087          |
| ILMN_2783997 | TRIM10        | 3.370881625          |
| ILMN_3161601 | SNCA          | 3.340589295          |
| ILMN_2601946 | 5033414K04RIK | 3.297834654          |
| ILMN_1228867 | A130082M07RIK | 3.157262632          |
| ILMN_3136638 | SNCA          | 3.14591837           |
| ILMN_2895284 | 2210023G05RIK | 3.126076675          |
| ILMN_2886128 | PCDHA10       | 3.085624289          |
| ILMN_1257368 | GM566         | 3.073208924          |
| ILMN_2635718 | BZRPL1        | 3.059590672          |
| ILMN_1239724 | PSMB1         | 3.031738703          |
| ILMN_1256142 | MARCKS        | 3.022926531          |
| ILMN_2690574 | FOXO3         | 2.972307993          |
| ILMN_1258520 | 4933421E18RIK | 2.903836286          |
| ILMN_2703061 | 2810408P10RIK | 2.867474892          |
| ILMN_2824625 | GM1604        | 2.825719679          |
| ILMN_1233843 | PTPN21        | 2.825301578          |
| ILMN_2620284 | PHLDB1        | 2.814372655          |
| ILMN_2745073 | LOC100047353  | 2.809357296          |
| ILMN_2749437 | RHOC          | 2.773049302          |
| ILMN_1248780 | SPRR2B        | 2.770363507          |
| ILMN_2703079 | PUNC          | 2.754789803          |
| ILMN_1255719 | A930004L03RIK | 2.735701046          |
| ILMN_2733594 | D630004A14RIK | 2.712208469          |
| ILMN_1254631 | AI481316      | 2.710449678          |
| ILMN_2939277 | SNCG          | 2.703626953          |
| ILMN_1225059 | SLC16A12      | 2.697244381          |
| ILMN_1217855 | NKG7          | 2.690910757          |
| ILMN_2753697 | CD2           | 2.674585226          |
| ILMN_1255513 | CDR2          | 2.671217726          |
| ILMN_2965737 | KLHL34        | 2.670969821          |
| ILMN_2524992 | EAR2          | 2.664017605          |
| ILMN_2498330 | LOC632997     | 2.64101161           |
| ILMN_1217629 | ITGAE         | 2.640617288          |
| ILMN_2626648 | 41522         | 2.611392387          |
| ILMN_1215949 | 1700040F17RIK | 2.595459871          |
| ILMN_3114124 | HSD3B7        | 2.594406596          |
| ILMN_1216823 | UBR5          | 2.584859171          |
| ILMN_1222683 | OLFR1441      | 2.577789931          |
| ILMN_2606162 | PDLIM4        | 2.57565855           |
| ILMN_1223081 | LOC241962     | 2.54822461           |
| ILMN_2435477 | 5830406C15RIK | 2.537539864          |
| ILMN_2686825 | 5430427O19RIK | 2.536086924          |

|              |                 |             |
|--------------|-----------------|-------------|
| ILMN_1222512 | MFSD7B          | 2.525669655 |
| ILMN_1248854 | ICK             | 2.525643685 |
| ILMN_2705689 | GGA2            | 2.522100556 |
| ILMN_2826881 | MYBL2           | 2.522004768 |
| ILMN_1220648 | A630014I05RIK   | 2.518845526 |
| ILMN_1378704 | control_ILMN_13 | 2.501520902 |
| ILMN_2715400 | TEF             | 2.495018969 |
| ILMN_1257579 | NUP210          | 2.490045841 |
| ILMN_2598271 | ASB17           | 2.490015142 |
| ILMN_1225557 | E030019B06RIK   | 2.484827893 |
| ILMN_2644350 | THY1            | 2.476638172 |
| ILMN_1216972 | CLEC4E          | 2.47211937  |
| ILMN_2679094 | MAP3K7IP2       | 2.471543957 |
| ILMN_2820893 | SELPLG          | 2.462368133 |
| ILMN_1223480 | D530031C13RIK   | 2.461106681 |
| ILMN_2495703 | CLIP2           | 2.449801678 |
| ILMN_2679591 | ERAP1           | 2.449203035 |
| ILMN_2465182 | XLR3B           | 2.447786159 |
| ILMN_1219011 | 3110040M04RIK   | 2.445802442 |
| ILMN_2870696 | HFE             | 2.434961339 |
| ILMN_3005873 | SORT1           | 2.431402316 |
| ILMN_2515285 | WASF3           | 2.431071739 |
| ILMN_2495555 | MAPK8IP2        | 2.429611427 |
| ILMN_2539917 | LOC384538       | 2.421951597 |
| ILMN_2757838 | IPPK            | 2.416554447 |
| ILMN_3162301 | OTTMUSG000000   | 2.414336977 |
| ILMN_2923717 | KCNT1           | 2.414048507 |
| ILMN_2725054 | A930006J02RIK   | 2.409634421 |
| ILMN_1230224 | DNAJC6          | 2.408553983 |
| ILMN_1225663 | LOC384162       | 2.408249488 |
| ILMN_1230818 | 9630015E22RIK   | 2.406694567 |
| ILMN_2539295 | LOC621968       | 2.406675656 |
| ILMN_2950828 | C030018G13RIK   | 2.405823034 |
| ILMN_2606792 | GBP4            | 2.404718824 |
| ILMN_1226665 | ISLR            | 2.404321761 |
| ILMN_2769325 | CD6             | 2.398106015 |
| ILMN_1228696 | ADA             | 2.39687535  |
| ILMN_2670368 | CAR5B           | 2.393795851 |
| ILMN_2658878 | TG              | 2.392922859 |
| ILMN_1242548 | HIF1A           | 2.389939819 |
| ILMN_1254380 | DBR1            | 2.386871534 |
| ILMN_2446592 | RAD18           | 2.378012721 |
| ILMN_2425143 | MJ-500-31_190   | 2.377329303 |
| ILMN_2769330 | CD6             | 2.373941676 |
| ILMN_3155363 | PPL             | 2.37383497  |
| ILMN_2454209 | TRBV6_AE000663  | 2.372090892 |
| ILMN_1235584 | PLEKHA5         | 2.371229664 |
| ILMN_1218694 | C630017J20RIK   | 2.370593123 |

|              |               |             |
|--------------|---------------|-------------|
| ILMN_2859348 | TAF9B         | 2.367681107 |
| ILMN_1231458 | IQGAP1        | 2.366074862 |
| ILMN_2426480 | 3830612M24    | 2.365830273 |
| ILMN_2664439 | 9230109A22RIK | 2.3624709   |
| ILMN_2498851 | 2310075M15RIK | 2.359962418 |
