# Supplementary material for: Comparing the Biological Impact of Glatiramer Acetate with the Biological Impact of a Generic
Source: PubMed Central journal article supplement (PMC3885444; doi:10.1371/journal.pone.0083757), 2014-01-08
Supplement: pone.0083757.s013.pdf [file pone.0083757.s013.pdf]

| TABLE S5                     |                |             |            |            |            |            |            |            |            |             |                                 |             |                   |
|------------------------------|----------------|-------------|------------|------------|------------|------------|------------|------------|------------|-------------|---------------------------------|-------------|-------------------|
| Comparative Marker Selection |                |             |            |            |            |            |            |            |            |             | Significant in Parametric Tests |             |                   |
| Probe                        | Gene           | Fold Change | T-test     |            | SNR        |            | LIMMA      |            | ANOVA      |             |                                 | 1=yes,0=no  | Wilcoxon Rank Sum |
|                              |                |             | Nom. P.    | Adj. P.    | Nom. P.    | Adj. P.    | Nom. P.    | Adj. P.    | Nom. P.    | Adj. P.     |                                 | Nom. P.     | Adj. P.           |
| ILMN_2685712                 | IFNG           | 1.41        | 0.0002995  | 0.01489206 | 0.0002995  | 0.01335371 | 2.36E-07   | 0.0000718  | 4.01E-07   | 0.000139    | 1                               | 2.06483E-05 | 0.00430994        |
| ILMN_2595857                 | ANKRD37        | 1.36        | 0.0002995  | 0.01489206 | 0.0002995  | 0.01335371 | 5.82E-12   | 1.69E-08   | 1.23E-08   | 0.0000119   | 1                               | 6.03547E-07 | 0.00057333        |
| ILMN_2791459                 | IFNG           | 1.33        | 0.0002995  | 0.01489206 | 0.0002995  | 0.01335371 | 0.00000199 | 0.00037564 | 0.00000642 | 0.00108     | 1                               | 0.000197175 | 0.01547711        |
| ILMN_2675232                 | KLK8           | 1.284884601 | 0.0002995  | 0.01489206 | 0.0002995  | 0.01335371 | 7.43E-19   | 3.46E-14   | 5.6E-14    | 2.61E-09    | 1                               | 7.95833E-09 | 0.00012222        |
| ILMN_1220788                 | GM590          | 1.284311292 | 0.0002995  | 0.01489206 | 0.0002995  | 0.01335371 | 3.92E-10   | 0.00000057 | 4.06E-09   | 0.00000573  | 1                               | 4.9657E-07  | 0.00052531        |
| ILMN_1253828                 | CD247          | 1.280944226 | 0.0002995  | 0.01489206 | 0.0002995  | 0.01335371 | 7.18E-09   | 0.00000514 | 1.89E-07   | 0.00000836  | 1                               | 1.53585E-05 | 0.00359242        |
| ILMN_2856926                 | GPR114         | 1.275591039 | 0.0002995  | 0.01489206 | 0.0002995  | 0.01335371 | 3.75E-15   | 5.82E-11   | 5.66E-11   | 0.000000293 | 1                               | 5.89499E-08 | 0.00024945        |
| ILMN_1218037                 | TMIE           | 1.25825101  | 0.0002995  | 0.01489206 | 0.0002995  | 0.01335371 | 1.6E-10    | 2.67E-07   | 8.95E-09   | 0.0000105   | 1                               | 1.80477E-06 | 0.001091          |
| ILMN_2664929                 | CD8B1          | 1.257683544 | 0.0002995  | 0.01489206 | 0.0002995  | 0.01335371 | 6.15E-13   | 2.6E-09    | 8E-11      | 0.000000367 | 1                               | 1.49655E-07 | 0.00034541        |
| ILMN_1240428                 | SATB1          | 1.253362369 | 0.0002995  | 0.01489206 | 0.0002995  | 0.01335371 | 3.36E-10   | 5.04E-07   | 3.35E-08   | 0.0000244   | 1                               | 2.88347E-07 | 0.00041943        |
| ILMN_2741169                 | CD8B1          | 1.24933849  | 0.0002995  | 0.01489206 | 0.0002995  | 0.01335371 | 2.32E-15   | 5.4E-11    | 3.06E-12   | 4.75E-08    | 1                               | 1.57497E-07 | 0.00034541        |
| ILMN_1250001                 | 4930583H14RIK  | 1.24042799  | 0.00094262 | 0.02607154 | 0.0006399  | 0.01941092 | 0.00000259 | 0.00046493 | 0.0000033  | 0.003242217 | 1                               | 0.000130304 | 0.01220373        |
| ILMN_2611022                 | BCL11B         | 1.239019043 | 0.0002995  | 0.01489206 | 0.0002995  | 0.01335371 | 7.52E-10   | 9.15E-07   | 0.00000014 | 0.0000707   | 1                               | 1.5356E-05  | 0.00359242        |
| ILMN_2707941                 | GPR83          | 1.238234714 | 0.0002995  | 0.01489206 | 0.0002995  | 0.01335371 | 9.31E-14   | 8.67E-10   | 2.22E-12   | 4.75E-08    | 1                               | 1.65715E-07 | 0.00034541        |
| ILMN_2769772                 | PIK3IP1        | 1.235639618 | 0.0002995  | 0.01489206 | 0.0002995  | 0.01335371 | 8.08E-12   | 2.21E-08   | 2.26E-09   | 0.00000363  | 1                               | 4.9657E-07  | 0.00052531        |
| ILMN_2775055                 | LOC669166      | 1.234427524 | 0.0002995  | 0.01489206 | 0.0002995  | 0.01335371 | 3.92E-12   | 1.4E-08    | 2.69E-09   | 0.00000405  | 1                               | 4.7283E-07  | 0.00052531        |
| ILMN_3128992                 | CD27           | 1.229968408 | 0.0002995  | 0.01489206 | 0.0002995  | 0.01335371 | 5.34E-13   | 2.48E-09   | 8.67E-11   | 0.000000367 | 1                               | 1.10038E-07 | 0.00029962        |
| ILMN_2416460                 | TRBV8_AE000663 | 1.227075821 | 0.0002995  | 0.01489206 | 0.0002995  | 0.01335371 | 5.05E-12   | 1.57E-08   | 2.14E-09   | 0.00000357  | 1                               | 2.49646E-06 | 0.00133566        |
| ILMN_2670150                 | OAS2           | 1.223676484 | 0.0002995  | 0.01489206 | 0.0002995  | 0.01335371 | 1.69E-08   | 0.0000104  | 2.75E-07   | 0.000109783 | 1                               | 1.80477E-06 | 0.001091          |
| ILMN_2454209                 | TRBV6_AE000663 | 1.223323464 | 0.0002995  | 0.01489206 | 0.0002995  | 0.01335371 | 4.23E-09   | 0.00000323 | 0.00000012 | 0.0000626   | 1                               | 0.000103509 | 0.01061242        |
| ILMN_2960700                 | PRF1           | 1.220037267 | 0.0002995  | 0.01489206 | 0.0002995  | 0.01335371 | 0.00000023 | 0.0000712  | 0.00000418 | 0.000771264 | 1                               | 3.99889E-05 | 0.00618393        |
| ILMN_1229318                 | PDK1           | 1.219922378 | 0.0002995  | 0.01489206 | 0.0002995  | 0.01335371 | 1.26E-09   | 0.00000128 | 5.7E-08    | 0.0000353   | 1                               | 1.98091E-06 | 0.00115257        |
| ILMN_1233589                 | CD27           | 1.219317837 | 0.0002995  | 0.01489206 | 0.0002995  | 0.01335371 | 3.67E-13   | 1.9E-09    | 1.77E-11   | 0.000000121 | 1                               | 2.95621E-08 | 0.00022934        |
| ILMN_2678521                 | GPR146         | 1.215770831 | 0.0002995  | 0.01489206 | 0.0002995  | 0.01335371 | 1.33E-13   | 8.87E-10   | 3.83E-11   | 0.000000223 | 1                               | 7.26855E-08 | 0.00026025        |
| ILMN_1256701                 | 2900016B01RIK  | 1.215770789 | 0.0002995  | 0.01489206 | 0.0002995  | 0.01335371 | 2.75E-08   | 0.0000147  | 4.48E-07   | 0.000148861 | 1                               | 2.54447E-05 | 0.00475651        |
| ILMN_1215167                 | DDX5           | 1.214758445 | 0.0006399  | 0.0211535  | 0.0006399  | 0.01941092 | 0.00010165 | 0.00670197 | 0.0000543  | 0.004539402 | 1                               | 7.0054E-05  | 0.00846962        |
| ILMN_3145331                 | TMSB10         | 1.209579271 | 0.0002995  | 0.01489206 | 0.0002995  | 0.01335371 | 4.98E-12   | 1.57E-08   | 1.59E-10   | 0.000000461 | 1                               | 2.13433E-07 | 0.00036795        |
| ILMN_1252200                 | A830055I09RIK  | 1.206497974 | 0.0002995  | 0.01489206 | 0.0002995  | 0.01335371 | 0.00000761 | 0.0010354  | 0.0000334  | 0.003276709 | 1                               | 5.74504E-05 | 0.00761864        |
| ILMN_2819380                 | BC030476       | 1.206275831 | 0.0002995  | 0.01489206 | 0.0002995  | 0.01335371 | 0.000036   | 0.00314503 | 0.00012566 | 0.008308344 | 1                               | 0.000197175 | 0.01547711        |
| ILMN_2932359                 | TPI1           | 1.204626968 | 0.0002995  | 0.01489206 | 0.0002995  | 0.01335371 | 5.08E-08   | 0.0000227  | 0.0000011  | 0.000288061 | 1                               | 1.53585E-05 | 0.00359242        |
| ILMN_2837493                 | EG634650       | 1.204245484 | 0.0002995  | 0.01489206 | 0.0002995  | 0.01335371 | 5.69E-08   | 0.0000248  | 5.02E-08   | 0.0000324   | 1                               | 4.9657E-07  | 0.00052531        |
| ILMN_1230137                 | TPI1           | 1.204175926 | 0.0002995  | 0.01489206 | 0.0002995  | 0.01335371 | 2.06E-08   | 0.0000124  | 0.00000121 | 0.000298774 | 1                               | 2.88127E-05 | 0.00509941        |
| ILMN_2944666                 | IFIT3          | 1.202746675 | 0.0002995  | 0.01489206 | 0.0002995  | 0.01335371 | 5.52E-08   | 0.0000242  | 2.84E-08   | 0.0000217   | 1                               | 2.74304E-07 | 0.00041187        |
| ILMN_1217855                 | NGK7           | 1.202473931 | 0.0006399  | 0.0211535  | 0.0006399  | 0.01941092 | 2.84E-08   | 0.0000149  | 5.31E-07   | 0.000169129 | 1                               | 0.000264806 | 0.01861919        |
| ILMN_2699898                 | ITGAE          | 1.201910561 | 0.0002995  | 0.01489206 | 0.0002995  | 0.01335371 | 1.42E-11   | 3.32E-08   | 1.38E-10   | 0.000000429 | 1                               | 1.04521E-07 | 0.00029962        |
| ILMN_2516221                 | TCRB-V8.2      | 1.20121668  | 0.0002995  | 0.01489206 | 0.0002995  | 0.01335371 | 1.11E-08   | 0.00000752 | 4.35E-07   | 0.000147963 | 1                               | 1.13766E-05 | 0.00307877        |
| ILMN_2652867                 | TRAT1          | 1.199470243 | 0.0002995  | 0.01489206 | 0.0002995  | 0.01335371 | 6.33E-10   | 8.19E-07   | 3.26E-08   | 0.0000241   | 1                               | 4.12145E-06 | 0.00171287        |
| ILMN_1229197                 | OTTMUSG000000  | 1.198389483 | 0.0002995  | 0.01489206 | 0.0002995  | 0.01335371 | 4.13E-08   | 0.00002    | 1.88E-08   | 0.0000159   | 1                               | 9.77116E-07 | 0.00079793        |
| ILMN_2618148                 | C330008K14RIK  | 1.196159524 | 0.0002995  | 0.01489206 | 0.0002995  | 0.01335371 | 2.81E-11   | 5.95E-08   | 1.46E-08   | 0.000013    | 1                               | 1.18196E-06 | 0.00088737        |
| ILMN_1214841                 | IL24           | 1.195664917 | 0.00094262 | 0.02607154 | 0.00094262 | 0.02430167 | 0.0000373  | 0.00322909 | 0.00014082 | 0.009031912 | 1                               | 0.002173782 | 0.0607706         |

|              |                 |             |            |            |            |            |            |            |            |             |   |             |            |
|--------------|-----------------|-------------|------------|------------|------------|------------|------------|------------|------------|-------------|---|-------------|------------|
| ILMN_1257496 | LOC665446       | 1.195420235 | 0.0002995  | 0.01489206 | 0.0002995  | 0.01335371 | 8.57E-08   | 0.0000344  | 0.00000185 | 0.000412402 | 1 | 1.47177E-05 | 0.00353126 |
| ILMN_2421246 | TCRB-V8.3       | 1.195307771 | 0.0002995  | 0.01489206 | 0.0002995  | 0.01335371 | 1.42E-09   | 0.00000136 | 4.63E-08   | 0.0000308   | 1 | 5.89742E-06 | 0.0021116  |
| ILMN_2729252 | 5830431A10RIK   | 1.195292385 | 0.0002995  | 0.01489206 | 0.0002995  | 0.01335371 | 1.38E-09   | 0.00000136 | 2.06E-08   | 0.0000171   | 1 | 1.2393E-06  | 0.00090134 |
| ILMN_2484932 | C030002B11RIK   | 1.193361778 | 0.0002995  | 0.01489206 | 0.0002995  | 0.01335371 | 6.33E-10   | 8.19E-07   | 5.47E-08   | 0.0000344   | 1 | 8.06586E-07 | 0.00070845 |
| ILMN_1221819 | FCGRT           | 1.193070246 | 0.0002995  | 0.01489206 | 0.0002995  | 0.01335371 | 7.12E-09   | 0.00000514 | 2.33E-08   | 0.0000187   | 1 | 9.56517E-06 | 0.00274856 |
| ILMN_2981167 | IFIT2           | 1.192834198 | 0.0002995  | 0.01489206 | 0.0002995  | 0.01335371 | 2.31E-08   | 0.000013   | 1.07E-08   | 0.0000115   | 1 | 3.88359E-07 | 0.00048857 |
| ILMN_2585233 | SELPL           | 1.192768508 | 0.0002995  | 0.01489206 | 0.0002995  | 0.01335371 | 8.22E-10   | 9.34E-07   | 8.63E-08   | 0.0000485   | 1 | 1.41024E-05 | 0.00347315 |
| ILMN_2697415 | CD3D            | 1.191227881 | 0.0002995  | 0.01489206 | 0.0002995  | 0.01335371 | 5.84E-10   | 7.99E-07   | 3.71E-08   | 0.0000262   | 1 | 5.64085E-06 | 0.00208385 |
| ILMN_1230345 | B830007D08RIK   | 1.191119956 | 0.0002995  | 0.01489206 | 0.0002995  | 0.01335371 | 3.22E-09   | 0.00000253 | 1.09E-08   | 0.0000115   | 1 | 1.57497E-07 | 0.00034541 |
| ILMN_2811263 | ZXDA            | 1.190267135 | 0.0002995  | 0.01489206 | 0.0006399  | 0.01941092 | 0.0000175  | 0.00184283 | 0.00015367 | 0.009469751 | 1 | 0.000176289 | 0.01444673 |
| ILMN_2560567 | A630006E02RIK   | 1.189860092 | 0.0002995  | 0.01489206 | 0.0002995  | 0.01335371 | 0.0000009  | 0.00020543 | 0.0000211  | 0.002464033 | 1 | 9.21443E-05 | 0.00995203 |
| ILMN_2820893 | SELPLG          | 1.188849449 | 0.0002995  | 0.01489206 | 0.0002995  | 0.01335371 | 1.27E-13   | 8.87E-10   | 8.13E-12   | 7.57E-08    | 1 | 5.59305E-08 | 0.00024945 |
| ILMN_1246609 | RASGRP1         | 1.18775349  | 0.0002995  | 0.01489206 | 0.0002995  | 0.01335371 | 3.02E-11   | 6.12E-08   | 2.46E-09   | 0.00000382  | 1 | 3.34766E-07 | 0.00044521 |
| ILMN_2660551 | LAT             | 1.187218377 | 0.0002995  | 0.01489206 | 0.0002995  | 0.01335371 | 9.43E-07   | 0.00021216 | 0.00000642 | 0.001075031 | 1 | 0.000130304 | 0.01220373 |
| ILMN_2507761 | 7530404M11RIK   | 1.186381811 | 0.0002995  | 0.01489206 | 0.0002995  | 0.01335371 | 0.0000307  | 0.00278714 | 0.0000826  | 0.006091257 | 1 | 9.21504E-05 | 0.00995203 |
| ILMN_2753697 | CD2             | 1.186334291 | 0.0002995  | 0.01489206 | 0.0002995  | 0.01335371 | 2.97E-13   | 1.73E-09   | 1.04E-10   | 0.000000395 | 1 | 1.92936E-07 | 0.00034541 |
| ILMN_2601453 | A130092J06RIK   | 1.186313516 | 0.0002995  | 0.01489206 | 0.0002995  | 0.01335371 | 3.23E-11   | 6.26E-08   | 9.08E-10   | 0.00000192  | 1 | 9.77016E-07 | 0.00079793 |
| ILMN_1234565 | P4HA1           | 1.186266686 | 0.0002995  | 0.01489206 | 0.0002995  | 0.01335371 | 1.07E-07   | 0.0000412  | 7.49E-07   | 0.000219513 | 1 | 8.39227E-06 | 0.00252023 |
| ILMN_2459899 | ADAMTSL4        | 1.185956519 | 0.0002995  | 0.01489206 | 0.0002995  | 0.01335371 | 2.09E-09   | 0.00000174 | 2.06E-07   | 0.0000903   | 1 | 3.93982E-06 | 0.00166715 |
| ILMN_2761720 | LOC100041103    | 1.185737904 | 0.0002995  | 0.01489206 | 0.0002995  | 0.01335371 | 1.19E-09   | 0.00000123 | 3.43E-08   | 0.0000245   | 1 | 9.77016E-07 | 0.00079793 |
| ILMN_1213954 | SGK1            | 1.185317215 | 0.0002995  | 0.01489206 | 0.0002995  | 0.01335371 | 1.06E-07   | 0.000041   | 3.55E-07   | 0.000132883 | 1 | 1.49642E-06 | 0.00102442 |
| ILMN_2632971 | B3GALT4         | 1.185249067 | 0.0002995  | 0.01489206 | 0.0002995  | 0.01335371 | 1.78E-09   | 0.00000151 | 2.34E-10   | 0.000000605 | 1 | 6.36427E-09 | 0.00012222 |
| ILMN_2860649 | GBP6            | 1.184770963 | 0.0002995  | 0.01489206 | 0.0002995  | 0.01335371 | 0.00000014 | 0.0000492  | 1.01E-07   | 0.0000545   | 1 | 1.72245E-06 | 0.00108344 |
| ILMN_2722784 | CD3G            | 1.184582149 | 0.0002995  | 0.01489206 | 0.0002995  | 0.01335371 | 4.91E-08   | 0.0000224  | 0.00000016 | 0.0000754   | 1 | 2.06467E-05 | 0.00430994 |
| ILMN_2667829 | PRKCQ           | 1.183849443 | 0.0002995  | 0.01489206 | 0.0002995  | 0.01335371 | 2.77E-11   | 5.95E-08   | 1.89E-10   | 0.000000518 | 1 | 8.49731E-08 | 0.00028252 |
| ILMN_1235499 | PROS1           | 1.183674675 | 0.0002995  | 0.01489206 | 0.0002995  | 0.01335371 | 4.45E-07   | 0.00012175 | 0.00000119 | 0.00029799  | 1 | 2.24533E-05 | 0.00440984 |
| ILMN_2694955 | IGFBP4          | 1.183278575 | 0.0002995  | 0.01489206 | 0.0002995  | 0.01335371 | 0.00000158 | 0.00031636 | 0.00000706 | 0.001150107 | 1 | 9.95836E-05 | 0.01046347 |
| ILMN_2491445 | LOC639001       | 1.183039504 | 0.0006399  | 0.0211535  | 0.0002995  | 0.01335371 | 2.23E-08   | 0.0000126  | 4.29E-07   | 0.000146987 | 1 | 4.70154E-05 | 0.00688184 |
| ILMN_2661185 | SCML4           | 1.18284704  | 0.0002995  | 0.01489206 | 0.0002995  | 0.01335371 | 0.00000016 | 0.0000542  | 0.0000016  | 0.000369569 | 1 | 1.81978E-05 | 0.00399552 |
| ILMN_2454823 | 6720418B01RIK   | 1.182721445 | 0.0002995  | 0.01489206 | 0.0002995  | 0.01335371 | 0.0000166  | 0.00178634 | 0.00013436 | 0.000874694 | 1 | 0.00057968  | 0.02968357 |
| ILMN_2947526 | ECM1            | 1.181777956 | 0.0002995  | 0.01489206 | 0.0002995  | 0.01335371 | 0.00000016 | 0.0000542  | 7.57E-07   | 0.000219513 | 1 | 7.35697E-06 | 0.00232956 |
| ILMN_2705407 | PABPC1          | 1.181328619 | 0.00094262 | 0.02607154 | 0.0006399  | 0.01941092 | 0.00011396 | 0.00731485 | 0.00024603 | 0.012809759 | 1 | 0.000329201 | 0.02128238 |
| ILMN_1227570 | LOC386545       | 1.180241912 | 0.0006399  | 0.0211535  | 0.0002995  | 0.01335371 | 1.36E-07   | 0.0000491  | 0.00000102 | 0.000272691 | 1 | 5.30373E-05 | 0.00748099 |
| ILMN_2475156 | XIST            | 1.179666178 | 0.0006399  | 0.0211535  | 0.0006399  | 0.01941092 | 0.00036367 | 0.01638681 | 0.00063489 | 0.023714186 | 1 | 0.001104095 | 0.04229821 |
| ILMN_1214650 | SCL0002368.1_75 | 1.179443236 | 0.0002995  | 0.01489206 | 0.0002995  | 0.01335371 | 0.0000372  | 0.00322909 | 0.0000222  | 0.00254822  | 1 | 3.68613E-05 | 0.00599924 |
| ILMN_2606825 | CMAH            | 1.17926401  | 0.0002995  | 0.01489206 | 0.0002995  | 0.01335371 | 1.13E-07   | 0.0000431  | 3.18E-07   | 0.000121491 | 1 | 7.35697E-06 | 0.00232956 |
| ILMN_1224032 | SKAP1           | 1.178850818 | 0.0002995  | 0.01489206 | 0.0002995  | 0.01335371 | 1.24E-08   | 0.00000822 | 6.12E-08   | 0.0000375   | 1 | 3.76554E-06 | 0.00162291 |
| ILMN_2436183 | BCL11B          | 1.178588337 | 0.0002995  | 0.01489206 | 0.0002995  | 0.01335371 | 8.65E-08   | 0.0000344  | 0.00000254 | 0.000523539 | 1 | 4.7012E-05  | 0.00688184 |
| ILMN_2419490 | TNFRSF18        | 1.178043424 | 0.0002995  | 0.01489206 | 0.0002995  | 0.01335371 | 7.56E-11   | 1.35E-07   | 1.53E-08   | 0.0000132   | 1 | 1.56849E-06 | 0.00104298 |
| ILMN_2432110 | LOC100046855    | 1.176564584 | 0.0002995  | 0.01489206 | 0.0002995  | 0.01335371 | 1.32E-07   | 0.0000482  | 9.52E-08   | 0.0000521   | 1 | 1.12718E-06 | 0.00087445 |
| ILMN_2443624 | BCL11B          | 1.17644894  | 0.0002995  | 0.01489206 | 0.0002995  | 0.01335371 | 2.53E-07   | 0.0000755  | 0.00000244 | 0.000512485 | 1 | 2.24533E-05 | 0.00440984 |
| ILMN_1217913 | D230007K08RIK   | 1.176197032 | 0.0002995  | 0.01489206 | 0.0002995  | 0.01335371 | 2.34E-08   | 0.000013   | 8.68E-08   | 0.0000485   | 1 | 1.02476E-06 | 0.0008224  |
| ILMN_1215649 | C230075M21RIK   | 1.176099557 | 0.0002995  | 0.01489206 | 0.0002995  | 0.01335371 | 0.0000672  | 0.00493359 | 0.00041344 | 0.017763501 | 1 | 0.000393771 | 0.02371136 |
| ILMN_1217629 | ITGAE           | 1.175144353 | 0.0002995  | 0.01489206 | 0.0002995  | 0.01335371 | 2.19E-08   | 0.0000126  | 1.49E-08   | 0.0000131   | 1 | 4.51028E-06 | 0.00180983 |
| ILMN_1215862 | CXCL9           | 1.174363745 | 0.00176049 | 0.0385938  | 0.00122569 | 0.02881591 | 0.01957651 | 0.17739607 | 0.00069086 | 0.02516235  | 0 | 0.001301571 | 0.04617913 |
| ILMN_2721399 | CTSW            | 1.172718248 | 0.0002995  | 0.01489206 | 0.0002995  | 0.01335371 | 2.77E-10   | 4.45E-07   | 4.69E-09   | 0.00000642  | 1 | 1.8046E-06  | 0.001091   |
| ILMN_1248340 | LSG1            | 1.172636468 | 0.0002995  | 0.01489206 | 0.0002995  | 0.01335371 | 0.00000275 | 0.00048633 | 0.0000158  | 0.00199766  | 1 | 2.65234E-05 | 0.00480383 |

|              |                 |             |            |            |            |            |            |            |            |             |   |             |            |
|--------------|-----------------|-------------|------------|------------|------------|------------|------------|------------|------------|-------------|---|-------------|------------|
| ILMN_2618176 | SOCS3           | 1.171028633 | 0.0002995  | 0.01489206 | 0.0002995  | 0.01335371 | 5.43E-10   | 7.65E-07   | 2.48E-08   | 0.0000192   | 1 | 7.35697E-06 | 0.00232956 |
| ILMN_1218717 | LOC385615       | 1.170940971 | 0.0002995  | 0.01489206 | 0.0002995  | 0.01335371 | 0.00000442 | 0.00070872 | 0.0000267  | 0.002856495 | 1 | 7.57938E-05 | 0.00879794 |
| ILMN_1247893 | GGEF2-PENDING   | 1.169922593 | 0.0002995  | 0.01489206 | 0.0002995  | 0.01335371 | 0.00000467 | 0.00072982 | 0.0000243  | 0.002709534 | 1 | 0.000120719 | 0.01149104 |
| ILMN_1224473 | LOC380797       | 1.16992167  | 0.00122569 | 0.03054155 | 0.00094262 | 0.02430167 | 0.00015376 | 0.00895396 | 0.00147216 | 0.0392018   | 1 | 0.00305523  | 0.07341857 |
| ILMN_2419494 | TNFRSF18        | 1.169716279 | 0.0002995  | 0.01489206 | 0.0002995  | 0.01335371 | 7.66E-10   | 9.15E-07   | 4.99E-08   | 0.0000324   | 1 | 5.39498E-06 | 0.00202516 |
| ILMN_2612125 | ARHGEF18        | 1.169661163 | 0.0002995  | 0.01489206 | 0.0002995  | 0.01335371 | 4.41E-08   | 0.0000212  | 0.00000152 | 0.000360463 | 1 | 9.15833E-06 | 0.00268109 |
| ILMN_2606162 | PDLIM4          | 1.169633574 | 0.0006399  | 0.02115353 | 0.0002995  | 0.01335371 | 4.78E-07   | 0.00012706 | 0.00000832 | 0.001279253 | 1 | 0.000600122 | 0.03046224 |
| ILMN_1217406 | 1110013L07RIK   | 1.169153834 | 0.0002995  | 0.01489206 | 0.0002995  | 0.01335371 | 4.77E-08   | 0.0000223  | 2.86E-07   | 0.000110081 | 1 | 1.13766E-05 | 0.00307877 |
| ILMN_2568571 | C130079K02RIK   | 1.168909165 | 0.0002995  | 0.01489206 | 0.0002995  | 0.01335371 | 5.37E-07   | 0.00013971 | 0.0000201  | 0.002389566 | 1 | 6.22097E-05 | 0.00789013 |
| ILMN_2818964 | DUSP10          | 1.168854568 | 0.0002995  | 0.01489206 | 0.0002995  | 0.01335371 | 0.0000386  | 0.00328743 | 0.000041   | 0.003797436 | 1 | 3.39668E-05 | 0.00570777 |
| ILMN_2431390 | TCRB-V8.2       | 1.167218786 | 0.0006399  | 0.02115353 | 0.0002995  | 0.01335371 | 1.7E-09    | 0.00000149 | 7.75E-08   | 0.0000451   | 1 | 1.23973E-05 | 0.00322459 |
| ILMN_2456911 | TRBV31_X03277_1 | 1.166841194 | 0.0006399  | 0.02115353 | 0.0002995  | 0.01335371 | 0.00000163 | 0.00032459 | 0.0000123  | 0.001649893 | 1 | 0.000540727 | 0.02850419 |
| ILMN_2981169 | IFIT2           | 1.165766787 | 0.0002995  | 0.01489206 | 0.0002995  | 0.01335371 | 0.0000117  | 0.00139985 | 0.00000211 | 0.00045645  | 1 | 3.43889E-06 | 0.00156931 |
| ILMN_1249366 | LOC100046608    | 1.165718568 | 0.0002995  | 0.01489206 | 0.0002995  | 0.01335371 | 1.59E-09   | 0.00000145 | 1.55E-07   | 0.0000735   | 1 | 5.64035E-06 | 0.00208385 |
| ILMN_1246194 | LOC667370       | 1.165517165 | 0.0002995  | 0.01489206 | 0.0002995  | 0.01335371 | 0.0008987  | 0.02917128 | 0.00023641 | 0.012496999 | 1 | 0.00022037  | 0.01646479 |
| ILMN_1236507 | 5830496L11RIK   | 1.164879502 | 0.0002995  | 0.01489206 | 0.0002995  | 0.01335371 | 0.0000665  | 0.00488934 | 0.00043189 | 0.018308965 | 1 | 0.000486846 | 0.02669165 |
| ILMN_1254692 | MS4A6B          | 1.164318447 | 0.0002995  | 0.01489206 | 0.0002995  | 0.01335371 | 0.00000049 | 0.00012954 | 8.08E-07   | 0.000227616 | 1 | 3.59866E-06 | 0.00158025 |
| ILMN_3156208 | GPR146          | 1.164011442 | 0.0002995  | 0.01489206 | 0.0002995  | 0.01335371 | 2.38E-08   | 0.000013   | 3.86E-07   | 0.00013797  | 1 | 6.44447E-06 | 0.00218957 |
| ILMN_2734391 | RAMP1           | 1.16383138  | 0.0002995  | 0.01489206 | 0.0002995  | 0.01335371 | 5.98E-09   | 0.00000442 | 2.14E-09   | 0.00000357  | 1 | 3.18544E-07 | 0.00044521 |
| ILMN_1224091 | XIST            | 1.16230787  | 0.0006399  | 0.02115353 | 0.00094262 | 0.02430167 | 0.00084048 | 0.02804442 | 0.00095208 | 0.030395331 | 1 | 0.001531279 | 0.05016159 |
| ILMN_2456216 | 5330403D14RIK   | 1.161809103 | 0.00094262 | 0.02607154 | 0.00094262 | 0.02430167 | 0.0000367  | 0.00319787 | 0.00031494 | 0.015019787 | 1 | 0.000903743 | 0.03800048 |
| ILMN_2627441 | PELI1           | 1.161752176 | 0.0002995  | 0.01489206 | 0.0002995  | 0.01335371 | 0.00000119 | 0.00025415 | 0.00000113 | 0.000290416 | 1 | 4.31186E-06 | 0.00177614 |
| ILMN_2891245 | RHBDL2          | 1.161573842 | 0.0020184  | 0.04200694 | 0.0020184  | 0.03953445 | 0.00050184 | 0.02040365 | 0.00120654 | 0.035013094 | 1 | 0.001977573 | 0.05767797 |
| ILMN_1232804 | LOC276837       | 1.161420855 | 0.0002995  | 0.01489206 | 0.0002995  | 0.01335371 | 3.19E-07   | 0.0000928  | 0.000001   | 0.000269028 | 1 | 6.47271E-05 | 0.00803428 |
| ILMN_1232537 | ARL4C           | 1.160980448 | 0.0002995  | 0.01489206 | 0.0002995  | 0.01335371 | 4.13E-07   | 0.000115   | 0.00000371 | 0.000722503 | 1 | 7.28705E-05 | 0.00865281 |
| ILMN_2444432 | TRBV1_AE000663  | 1.160799824 | 0.0002995  | 0.01489206 | 0.0002995  | 0.01335371 | 0.00000104 | 0.00022691 | 0.00000112 | 0.000290018 | 1 | 7.57938E-05 | 0.00879794 |
| ILMN_2756046 | FFAR2           | 1.160027707 | 0.0002995  | 0.01489206 | 0.0002995  | 0.01335371 | 0.0000389  | 0.00330056 | 1.33E-07   | 0.000068    | 1 | 2.99936E-06 | 0.00146959 |
| ILMN_1214163 | B230380D07RIK   | 1.159421403 | 0.0002995  | 0.01489206 | 0.0002995  | 0.01335371 | 6.66E-08   | 0.0000279  | 4.61E-07   | 0.000152045 | 1 | 4.16456E-05 | 0.00639762 |
| ILMN_2613832 | MGST2           | 1.159082249 | 0.0002995  | 0.01489206 | 0.0002995  | 0.01335371 | 0.00000018 | 0.0000594  | 1.27E-08   | 0.0000119   | 1 | 1.49656E-06 | 0.00102442 |
| ILMN_2506039 | A130090K04RIK   | 1.158817015 | 0.0002995  | 0.01489206 | 0.0002995  | 0.01335371 | 6.61E-07   | 0.0001602  | 4.04E-07   | 0.00013924  | 1 | 7.03988E-06 | 0.00230764 |
| ILMN_1219179 | A830081L15RIK   | 1.158794735 | 0.0002995  | 0.01489206 | 0.0002995  | 0.01335371 | 0.00000165 | 0.00032655 | 0.00000379 | 0.000732759 | 1 | 8.39227E-06 | 0.00252023 |
| ILMN_1248898 | A830092P18RIK   | 1.158658732 | 0.0002995  | 0.01489206 | 0.0002995  | 0.01335371 | 0.00000523 | 0.00078323 | 0.0000278  | 0.002931426 | 1 | 9.5799E-05  | 0.01018072 |
| ILMN_2651575 | IFNGR1          | 1.158581155 | 0.0002995  | 0.01489206 | 0.0002995  | 0.01335371 | 5.63E-07   | 0.00014332 | 0.00000707 | 0.001150107 | 1 | 1.1878E-05  | 0.00314139 |
| ILMN_2708580 | INADL           | 1.158423303 | 0.0002995  | 0.01489206 | 0.0002995  | 0.01335371 | 1.33E-07   | 0.0000482  | 2.41E-07   | 0.000101903 | 1 | 3.76554E-06 | 0.00162291 |
| ILMN_1236256 | ARHGEF1         | 1.158058706 | 0.0002995  | 0.01489206 | 0.0006399  | 0.01941092 | 0.00012116 | 0.00760514 | 0.00023881 | 0.012588785 | 1 | 0.00022037  | 0.01646479 |
| ILMN_2525855 | FUS             | 1.157139415 | 0.0002995  | 0.01489206 | 0.0002995  | 0.01335371 | 0.0000124  | 0.00144807 | 0.0000814  | 0.006023296 | 1 | 9.5799E-05  | 0.01018072 |
| ILMN_2526938 | LOC623121       | 1.157084959 | 0.0002995  | 0.01489206 | 0.0002995  | 0.01335371 | 0.0000881  | 0.00606307 | 0.0001654  | 0.009948464 | 1 | 0.000393771 | 0.02371136 |
| ILMN_1213664 | LOC665425       | 1.156699853 | 0.00094262 | 0.02607154 | 0.0006399  | 0.01941092 | 0.00000457 | 0.0007204  | 0.0000219  | 0.002525607 | 1 | 0.000157497 | 0.01350097 |
| ILMN_1255743 | IL6RA           | 1.1564233   | 0.0002995  | 0.01489206 | 0.0002995  | 0.01335371 | 0.0000121  | 0.00143247 | 0.0000346  | 0.003367292 | 1 | 0.00011618  | 0.0112429  |
| ILMN_2646625 | JUN             | 1.155896052 | 0.0002995  | 0.01489206 | 0.0002995  | 0.01335371 | 4.75E-08   | 0.0000223  | 4.3E-08    | 0.0000294   | 1 | 8.0667E-07  | 0.00070845 |
| ILMN_2843019 | KLHDC1          | 1.155520822 | 0.0002995  | 0.01489206 | 0.0002995  | 0.01335371 | 5.72E-07   | 0.00014393 | 0.00000446 | 0.000810182 | 1 | 3.00244E-05 | 0.00527375 |
| ILMN_3047389 | GBP2            | 1.155409559 | 0.00397039 | 0.064249   | 0.00467484 | 0.06877491 | 0.00439071 | 0.07547063 | 0.00354418 | 0.067235737 | 0 | 0.003774648 | 0.08295494 |
| ILMN_1257639 | 0610009J05RIK   | 1.155036694 | 0.0002995  | 0.01489206 | 0.0002995  | 0.01335371 | 0.0000254  | 0.00245781 | 0.00014036 | 0.009023792 | 1 | 0.000157487 | 0.01350097 |
| ILMN_1239770 | PELI1           | 1.154754524 | 0.0002995  | 0.01489206 | 0.0002995  | 0.01335371 | 2.15E-08   | 0.0000125  | 6.23E-08   | 0.0000377   | 1 | 1.56849E-06 | 0.00104298 |
| ILMN_2669841 | 6330581N18RIK   | 1.153993411 | 0.0002995  | 0.01489206 | 0.0002995  | 0.01335371 | 0.00000028 | 0.0000823  | 1.21E-07   | 0.0000627   | 1 | 1.29931E-06 | 0.00093044 |
| ILMN_2797061 | ACTN2           | 1.153924476 | 0.0002995  | 0.01489206 | 0.0002995  | 0.01335371 | 3.85E-08   | 0.0000189  | 1.24E-08   | 0.0000119   | 1 | 1.18196E-06 | 0.00088737 |
| ILMN_2784580 | CD3E            | 1.153886402 | 0.00094262 | 0.02607154 | 0.0002995  | 0.01335371 | 0.00000294 | 0.00051612 | 0.0000297  | 0.003067006 | 1 | 0.000763113 | 0.03482416 |

|              |                  |             |            |            |            |            |            |            |            |             |   |             |            |
|--------------|------------------|-------------|------------|------------|------------|------------|------------|------------|------------|-------------|---|-------------|------------|
| ILMN_3006219 | FYB              | 1.153762655 | 0.0002995  | 0.01489206 | 0.0002995  | 0.01335371 | 0.0000042  | 0.0006766  | 0.0000232  | 0.002627969 | 1 | 0.000157497 | 0.01350097 |
| ILMN_2467190 | BAMBI-PS1        | 1.15354344  | 0.0002995  | 0.01489206 | 0.0002995  | 0.01335371 | 0.00000128 | 0.00026647 | 0.0000012  | 0.00029799  | 1 | 2.76434E-05 | 0.00493033 |
| ILMN_2536349 | LOC386513        | 1.153082558 | 0.0002995  | 0.01489206 | 0.0002995  | 0.01335371 | 6.12E-08   | 0.0000262  | 4.94E-07   | 0.00016183  | 1 | 4.16456E-05 | 0.00639762 |
| ILMN_2432550 | TRIB2            | 1.15299348  | 0.0002995  | 0.01489206 | 0.0002995  | 0.01335371 | 2.08E-07   | 0.0000667  | 3.94E-07   | 0.00013797  | 1 | 6.16514E-06 | 0.0021257  |
| ILMN_2844996 | ACTN1            | 1.152882536 | 0.0002995  | 0.01489206 | 0.0002995  | 0.01335371 | 0.00000474 | 0.0007333  | 0.0000112  | 0.001548243 | 1 | 0.000140602 | 0.01273272 |
| ILMN_1247281 | 5830468F06RIK    | 1.15264746  | 0.0002995  | 0.01489206 | 0.0002995  | 0.01335371 | 3.03E-07   | 0.0000888  | 7.59E-07   | 0.000219513 | 1 | 2.73684E-06 | 0.00139991 |
| ILMN_1227814 | SRR              | 1.1524679   | 0.00444101 | 0.0691859  | 0.00373333 | 0.05925673 | 0.00032551 | 0.01515171 | 0.00191731 | 0.04584872  | 0 | 0.004782836 | 0.09409752 |
| ILMN_1249021 | BCL2             | 1.152415672 | 0.0002995  | 0.01489206 | 0.0002995  | 0.01335371 | 2.39E-08   | 0.000013   | 2.71E-07   | 0.000109783 | 1 | 7.35697E-06 | 0.00232956 |
| ILMN_2427592 | LOC546630        | 1.152263699 | 0.0002995  | 0.01489206 | 0.0002995  | 0.01335371 | 3.87E-08   | 0.0000189  | 7.4E-08    | 0.0000436   | 1 | 8.87963E-07 | 0.00076541 |
| ILMN_1259075 | NME7             | 1.152030836 | 0.0002995  | 0.01489206 | 0.0002995  | 0.01335371 | 6.14E-08   | 0.0000262  | 2.53E-07   | 0.000106116 | 1 | 3.43889E-06 | 0.00156931 |
| ILMN_1343049 | control ILMN_134 | 1.151797691 | 0.0006399  | 0.0211535  | 0.0006399  | 0.01941092 | 0.0000486  | 0.00386324 | 0.0000962  | 0.006777584 | 1 | 0.000111795 | 0.01097902 |
| ILMN_3026397 | CHKA             | 1.1512093   | 0.00373333 | 0.06184411 | 0.00397039 | 0.06196763 | 0.0007963  | 0.02730155 | 0.00350197 | 0.066778429 | 0 | 0.005373402 | 0.10008988 |
| ILMN_2631610 | TMEM71           | 1.15055696  | 0.0002995  | 0.01489206 | 0.0002995  | 0.01335371 | 0.00000196 | 0.00037186 | 7.31E-07   | 0.000218104 | 1 | 2.99936E-06 | 0.00146959 |
| ILMN_1227434 | ITGB7            | 1.150210635 | 0.0006399  | 0.0211535  | 0.0002995  | 0.01335371 | 0.00000383 | 0.00063236 | 0.00000744 | 0.001193798 | 1 | 7.57886E-05 | 0.00879794 |
| ILMN_1232600 | RNF125           | 1.150131069 | 0.0002995  | 0.01489206 | 0.0002995  | 0.01335371 | 7.88E-08   | 0.0000325  | 5.26E-07   | 0.000168884 | 1 | 8.0326E-06  | 0.00247612 |
| ILMN_2656854 | MYO6             | 1.149171076 | 0.0002995  | 0.01489206 | 0.0002995  | 0.01335371 | 0.0000106  | 0.00129112 | 0.000015   | 0.001927918 | 1 | 0.000763113 | 0.03482416 |
| ILMN_1258652 | RBBP2            | 1.148685264 | 0.0002995  | 0.01489206 | 0.0002995  | 0.01335371 | 0.0000026  | 0.00046493 | 0.00000949 | 0.00136995  | 1 | 2.24533E-05 | 0.00440984 |
| ILMN_1245754 | CD84             | 1.148512188 | 0.0002995  | 0.01489206 | 0.0002995  | 0.01335371 | 0.0000661  | 0.0048741  | 0.00015814 | 0.009685436 | 1 | 0.00042277  | 0.02466001 |
| ILMN_2780247 | LTA              | 1.147812483 | 0.00149689 | 0.03478153 | 0.00094262 | 0.02430167 | 0.0000477  | 0.00381669 | 0.0000069  | 0.005349701 | 1 | 0.000665544 | 0.03206944 |
| ILMN_2663930 | SLFN1            | 1.147768768 | 0.0002995  | 0.01489206 | 0.0002995  | 0.01335371 | 0.00000138 | 0.00028053 | 0.00000835 | 0.001279253 | 1 | 0.000111802 | 0.01097902 |
| ILMN_3023230 | JMJD3            | 1.147753644 | 0.0002995  | 0.01489206 | 0.0002995  | 0.01335371 | 0.00000543 | 0.00080725 | 0.0000199  | 0.002370654 | 1 | 0.00011618  | 0.0112429  |
| ILMN_2764727 | ACTN2            | 1.146764113 | 0.0002995  | 0.01489206 | 0.0002995  | 0.01335371 | 1.37E-08   | 0.00000883 | 0.00000044 | 0.000148085 | 1 | 2.65234E-05 | 0.00480383 |
| ILMN_2539295 | LOC621968        | 1.14667536  | 0.00149689 | 0.03478153 | 0.0006399  | 0.01941092 | 0.00000448 | 0.00070872 | 0.000044   | 0.003965776 | 1 | 0.001797898 | 0.05487657 |
| ILMN_2448404 | SCL0002975.1_346 | 1.146129707 | 0.00176049 | 0.0385938  | 0.0020184  | 0.03953445 | 0.00133016 | 0.03704155 | 0.00169107 | 0.042433629 | 1 | 0.002787111 | 0.07008733 |
| ILMN_1241915 | NOTCH1           | 1.145832115 | 0.0002995  | 0.01489206 | 0.0002995  | 0.01335371 | 0.00000308 | 0.00053349 | 0.00000333 | 0.000657593 | 1 | 2.24515E-05 | 0.00440984 |
| ILMN_2605819 | EGLN3            | 1.145595193 | 0.0006399  | 0.0211535  | 0.0006399  | 0.01941092 | 0.00000579 | 0.00084519 | 0.0000358  | 0.003445285 | 1 | 0.000353739 | 0.02219068 |
| ILMN_1253699 | 2900045G02RIK    | 1.145548347 | 0.0002995  | 0.01489206 | 0.0002995  | 0.01335371 | 0.00000247 | 0.00045603 | 0.0000131  | 0.001740513 | 1 | 3.12891E-05 | 0.00543437 |
| ILMN_1244853 | LOC100044948     | 1.14491469  | 0.0002995  | 0.01489206 | 0.0002995  | 0.01335371 | 0.00000528 | 0.0007879  | 0.000019   | 0.002312072 | 1 | 0.00022037  | 0.01646479 |
| ILMN_2589871 | CD28             | 1.144678691 | 0.0006399  | 0.0211535  | 0.0002995  | 0.01335371 | 0.00000485 | 0.00074167 | 0.00000392 | 0.000746457 | 1 | 2.34111E-05 | 0.00450296 |
| ILMN_2997406 | ARL4C            | 1.144292866 | 0.00094262 | 0.02607154 | 0.0006399  | 0.01941092 | 0.0000259  | 0.00247667 | 0.0000788  | 0.005900268 | 1 | 0.001686537 | 0.05325863 |
| ILMN_2860645 | GBP6             | 1.143811908 | 0.0006399  | 0.0211535  | 0.0006399  | 0.01941092 | 0.00023405 | 0.01207808 | 0.00011452 | 0.007736431 | 1 | 0.000169803 | 0.01418997 |
| ILMN_1249547 | ZFP292           | 1.143548873 | 0.0002995  | 0.01489206 | 0.0002995  | 0.01335371 | 0.0000159  | 0.00174469 | 0.0000524  | 0.004443054 | 1 | 0.000163541 | 0.01374071 |
| ILMN_1236539 | PFKL             | 1.142647393 | 0.0002995  | 0.01489206 | 0.0002995  | 0.01335371 | 0.00000177 | 0.00034525 | 0.0000425  | 0.00387062  | 1 | 0.000329201 | 0.02128238 |
| ILMN_2425990 | 4933421G18RIK    | 1.142576402 | 0.0002995  | 0.01489206 | 0.0002995  | 0.01335371 | 0.0000176  | 0.00184358 | 0.0000196  | 0.002353419 | 1 | 5.89742E-06 | 0.0021116  |
| ILMN_2553041 | A130093121RIK    | 1.142422921 | 0.00176049 | 0.0385938  | 0.00227139 | 0.0429166  | 0.00011916 | 0.00754608 | 0.00091734 | 0.029755562 | 1 | 0.000873828 | 0.03714525 |
| ILMN_1224945 | E130113K22RIK    | 1.141736556 | 0.0002995  | 0.01489206 | 0.0002995  | 0.01335371 | 0.00000824 | 0.0010961  | 0.0000241  | 0.002707128 | 1 | 1.89821E-05 | 0.00409055 |
| ILMN_1218525 | IL18R1           | 1.141400055 | 0.0002995  | 0.01489206 | 0.0002995  | 0.01335371 | 0.0000071  | 0.00098878 | 0.00000253 | 0.000522839 | 1 | 5.52021E-05 | 0.00760204 |
| ILMN_1243621 | A130026C10RIK    | 1.141355268 | 0.0002995  | 0.01489206 | 0.0002995  | 0.01335371 | 0.00014647 | 0.00871594 | 0.00067402 | 0.024761981 | 1 | 0.00057968  | 0.02968357 |
| ILMN_1228608 | LOC637353        | 1.141241268 | 0.00373333 | 0.06184411 | 0.00349473 | 0.0566205  | 0.00162544 | 0.04219715 | 0.00320971 | 0.063172249 | 0 | 0.005070533 | 0.09692735 |
| ILMN_1229746 | ECM1             | 1.141034556 | 0.0002995  | 0.01489206 | 0.0002995  | 0.01335371 | 0.00000063 | 0.00015526 | 0.00000018 | 0.0000829   | 1 | 1.89087E-06 | 0.00111411 |
| ILMN_2915951 | D13ERTD608E      | 1.140936106 | 0.0002995  | 0.01489206 | 0.0002995  | 0.01335371 | 0.0000242  | 0.0023517  | 0.0000549  | 0.004568149 | 1 | 5.97852E-05 | 0.00777325 |
| ILMN_1249864 | A630077B13RIK    | 1.140911297 | 0.00094262 | 0.02607154 | 0.0002995  | 0.01335371 | 0.0000339  | 0.00303141 | 0.0000306  | 0.003131644 | 1 | 0.000111802 | 0.01097902 |
| ILMN_2995934 | LOC547323        | 1.140861547 | 0.0002995  | 0.01489206 | 0.0002995  | 0.01335371 | 0.00000251 | 0.00046209 | 0.00000828 | 0.001279253 | 1 | 3.99889E-05 | 0.00618393 |
| ILMN_2456391 | TCRB-J           | 1.140797339 | 0.00176049 | 0.0385938  | 0.0002995  | 0.01335371 | 0.0000215  | 0.00216998 | 0.00010468 | 0.007215102 | 1 | 0.001068077 | 0.04167292 |
| ILMN_1239469 | LEF1             | 1.140750182 | 0.0002995  | 0.01489206 | 0.0002995  | 0.01335371 | 0.00000385 | 0.00063236 | 0.0000028  | 0.000567027 | 1 | 9.56597E-06 | 0.00274856 |
| ILMN_1259463 | ANKZF1           | 1.140723241 | 0.0002995  | 0.01489206 | 0.0002995  | 0.01335371 | 1.15E-07   | 0.0000431  | 8.51E-07   | 0.00023576  | 1 | 2.27642E-06 | 0.00127663 |
| ILMN_3142803 | CXCL10           | 1.140155785 | 0.0032539  | 0.05678214 | 0.00301234 | 0.05155233 | 0.00516161 | 0.08343803 | 0.00230778 | 0.05128928  | 0 | 0.003346676 | 0.07734743 |

|              |                |             |            |            |            |            |            |            |            |             |   |             |            |
|--------------|----------------|-------------|------------|------------|------------|------------|------------|------------|------------|-------------|---|-------------|------------|
| ILMN_2594768 | THA1           | 1.139893861 | 0.00149689 | 0.03478153 | 0.00094262 | 0.02430167 | 0.0000101  | 0.00124325 | 0.00018697 | 0.010823311 | 1 | 0.000470028 | 0.02607676 |
| ILMN_2677207 | LOC100047788   | 1.139882555 | 0.0056004  | 0.08017457 | 0.00490758 | 0.07073729 | 0.00128112 | 0.03625071 | 0.00280343 | 0.058355577 | 0 | 0.00675613  | 0.11179438 |
| ILMN_1226048 | A1504432       | 1.13986418  | 0.0002995  | 0.01489206 | 0.0002995  | 0.01335371 | 4.96E-07   | 0.00013044 | 5.84E-07   | 0.000181161 | 1 | 6.16514E-06 | 0.0021257  |
| ILMN_1241598 | LY116          | 1.139617809 | 0.0002995  | 0.01489206 | 0.0002995  | 0.01335371 | 0.0000304  | 0.00278339 | 0.000043   | 0.0003909   | 1 | 0.000135352 | 0.01242731 |
| ILMN_1258272 | LOC382646      | 1.139404236 | 0.00149689 | 0.03478153 | 0.00122569 | 0.02881591 | 0.00019446 | 0.01053711 | 0.00033198 | 0.01550964  | 1 | 0.001033149 | 0.04099743 |
| ILMN_1238847 | CD3E           | 1.139135835 | 0.0006399  | 0.0211535  | 0.0002995  | 0.01335371 | 0.00000182 | 0.00035008 | 0.00000947 | 0.00136995  | 1 | 0.000353739 | 0.02219068 |
| ILMN_1254218 | NISCH          | 1.138664045 | 0.0002995  | 0.01489206 | 0.0002995  | 0.01335371 | 0.0000288  | 0.00267634 | 0.00013436 | 0.00874694  | 1 | 7.28705E-05 | 0.00865281 |
| ILMN_2879858 | PRKX           | 1.138650161 | 0.0002995  | 0.01489206 | 0.0002995  | 0.01335371 | 9.55E-12   | 2.47E-08   | 4.3E-12    | 0.00000005  | 1 | 1.05033E-08 | 0.00012222 |
| ILMN_1231490 | Z410006H16RIK  | 1.138597457 | 0.0002995  | 0.01489206 | 0.0002995  | 0.01335371 | 0.0000613  | 0.00458827 | 0.0000093  | 0.006607866 | 1 | 9.5799E-05  | 0.01018072 |
| ILMN_1232707 | SAMHD1         | 1.138552379 | 0.0002995  | 0.01489206 | 0.0002995  | 0.01335371 | 0.00000184 | 0.00035317 | 2.73E-07   | 0.000109783 | 1 | 8.0326E-06  | 0.00247612 |
| ILMN_1240592 | ALS2CL         | 1.138470539 | 0.01404445 | 0.13554668 | 0.01142074 | 0.11750706 | 0.00241847 | 0.05412137 | 0.00804871 | 0.105414587 | 0 | 0.019643191 | 0.19233384 |
| ILMN_3142602 | B3GALT4        | 1.138320625 | 0.0002995  | 0.01489206 | 0.0002995  | 0.01335371 | 1.28E-07   | 0.0000472  | 2.85E-07   | 0.000110081 | 1 | 1.72245E-06 | 0.00108344 |
| ILMN_3031781 | ARID5B         | 1.138169635 | 0.0006399  | 0.0211535  | 0.00094262 | 0.02430167 | 0.00017446 | 0.00971369 | 0.00037839 | 0.0167608   | 1 | 0.000665544 | 0.03206944 |
| ILMN_2568028 | IL2RG          | 1.138046812 | 0.0006399  | 0.0211535  | 0.0002995  | 0.01335371 | 0.0000163  | 0.00177372 | 0.00010898 | 0.007416137 | 1 | 0.000151664 | 0.01324485 |
| ILMN_1239776 | LOC100040243   | 1.1379032   | 0.00094262 | 0.02607154 | 0.0006399  | 0.01941092 | 0.0000766  | 0.00547181 | 0.00037845 | 0.0167608   | 1 | 0.000341264 | 0.02181978 |
| ILMN_1253691 | B430201A12RIK  | 1.137684368 | 0.0002995  | 0.01489206 | 0.0002995  | 0.01335371 | 3.76E-07   | 0.00010665 | 3.57E-07   | 0.000132883 | 1 | 4.50187E-07 | 0.00052531 |
| ILMN_1239238 | PRKCH          | 1.137598283 | 0.0002995  | 0.01489206 | 0.0002995  | 0.01335371 | 0.00000445 | 0.00070872 | 9.27E-07   | 0.000252346 | 1 | 5.30373E-05 | 0.00748099 |
| ILMN_2663230 | SLCO3A1        | 1.137294887 | 0.00094262 | 0.02607154 | 0.0006399  | 0.01941092 | 2.28E-07   | 0.0000712  | 0.00000754 | 0.001205762 | 1 | 0.00010758  | 0.01083883 |
| ILMN_1255869 | CATNB          | 1.137232235 | 0.0002995  | 0.01489206 | 0.0002995  | 0.01335371 | 0.0000558  | 0.0042775  | 0.0000935  | 0.006622679 | 1 | 0.000135361 | 0.01242731 |
| ILMN_2847773 | OTTMUSG0000000 | 1.137208625 | 0.0002995  | 0.01489206 | 0.0002995  | 0.01335371 | 0.00000407 | 0.0006631  | 0.00000411 | 0.000768531 | 1 | 3.39668E-05 | 0.00570777 |
| ILMN_2945940 | RAPGEF4        | 1.136953118 | 0.0002995  | 0.01489206 | 0.0002995  | 0.01335371 | 0.0000964  | 0.00649408 | 0.0000445  | 0.003979315 | 1 | 0.000220357 | 0.01646479 |
| ILMN_2426853 | UBD            | 1.13683555  | 0.00149689 | 0.03478153 | 0.00149689 | 0.03284241 | 0.00151895 | 0.04027676 | 0.00035471 | 0.016129651 | 1 | 0.001389344 | 0.04772897 |
| ILMN_2639972 | PPP1R3B        | 1.136776701 | 0.0002995  | 0.01489206 | 0.0002995  | 0.01335371 | 0.0000018  | 0.00034718 | 0.00000665 | 0.001105293 | 1 | 0.000146035 | 0.01292295 |
| ILMN_2693461 | SSBP2          | 1.136455877 | 0.0002995  | 0.01489206 | 0.0002995  | 0.01335371 | 0.00000811 | 0.00108443 | 0.0000104  | 0.001467743 | 1 | 9.95836E-05 | 0.01046347 |
| ILMN_1258988 | IGFBP4         | 1.136364638 | 0.00605844 | 0.08369461 | 0.00397039 | 0.06196763 | 0.00044687 | 0.01884113 | 0.00175534 | 0.043416704 | 0 | 0.012677869 | 0.1539569  |
| ILMN_2509988 | LBR            | 1.136214053 | 0.0002995  | 0.01489206 | 0.0002995  | 0.01335371 | 0.00037342 | 0.01669711 | 0.00049349 | 0.020167155 | 1 | 0.000317538 | 0.02078825 |
| ILMN_1230458 | IFIT3          | 1.136194338 | 0.0020184  | 0.04200694 | 0.00149689 | 0.03284241 | 0.00399845 | 0.07166564 | 0.00197876 | 0.046801373 | 0 | 0.001301631 | 0.04617913 |
| ILMN_2727235 | ANKRD11        | 1.136184371 | 0.0020184  | 0.04200694 | 0.00122569 | 0.02881591 | 0.00057505 | 0.02210324 | 0.00110173 | 0.033170811 | 1 | 0.004006777 | 0.0855913  |
| ILMN_2637714 | RASA3          | 1.135912258 | 0.0002995  | 0.01489206 | 0.0002995  | 0.01335371 | 1.38E-07   | 0.0000492  | 7.38E-08   | 0.0000436   | 1 | 1.92936E-07 | 0.00034541 |
| ILMN_2595918 | GIMAP7         | 1.135856716 | 0.0006399  | 0.0211535  | 0.0006399  | 0.01941092 | 0.00000021 | 0.0000667  | 0.00000695 | 0.001138958 | 1 | 0.000183009 | 0.01471244 |
| ILMN_1231573 | SERPINB1A      | 1.135730392 | 0.0002995  | 0.01489206 | 0.0002995  | 0.01335371 | 9.05E-07   | 0.00020553 | 0.00000222 | 0.000472255 | 1 | 3.83949E-05 | 0.00609954 |
| ILMN_2459155 | ZFP238         | 1.135647435 | 0.0002995  | 0.01489206 | 0.0002995  | 0.01335371 | 0.00017162 | 0.00962449 | 0.00031671 | 0.015073371 | 1 | 0.000470028 | 0.02607676 |
| ILMN_1243910 | ZFP292         | 1.13546193  | 0.0006399  | 0.0211535  | 0.0002995  | 0.01335371 | 0.00016234 | 0.00923784 | 0.00035402 | 0.016129651 | 1 | 0.000712779 | 0.03334445 |
| ILMN_1222471 | GMFG           | 1.13543581  | 0.0002995  | 0.01489206 | 0.0002995  | 0.01335371 | 9.07E-09   | 0.0000064  | 9.8E-09    | 0.0000111   | 1 | 5.74828E-07 | 0.00056929 |
| ILMN_2469190 | B230345P09RIK  | 1.135305336 | 0.0006399  | 0.0211535  | 0.00094262 | 0.02430167 | 0.00017922 | 0.00989578 | 0.00053924 | 0.021235038 | 1 | 0.000212355 | 0.01604723 |
| ILMN_2696492 | PHF11          | 1.135183534 | 0.00094262 | 0.02607154 | 0.0006399  | 0.01941092 | 0.0000941  | 0.00638343 | 0.00015178 | 0.009420008 | 1 | 0.000504223 | 0.02732257 |
| ILMN_2996904 | OBFC2A         | 1.135148949 | 0.0002995  | 0.01489206 | 0.0002995  | 0.01335371 | 0.00000351 | 0.00059253 | 0.00000887 | 0.001330104 | 1 | 2.88127E-05 | 0.00509941 |
| ILMN_1233449 | LOC100044430   | 1.13513543  | 0.0002995  | 0.01489206 | 0.0002995  | 0.01335371 | 0.00000334 | 0.00057008 | 0.00000669 | 0.00110836  | 1 | 0.000212368 | 0.01604723 |
| ILMN_1251193 | A630084D02RIK  | 1.134829034 | 0.0002995  | 0.01489206 | 0.0002995  | 0.01335371 | 0.00032183 | 0.01505533 | 0.0002505  | 0.012926945 | 1 | 0.000379979 | 0.02324165 |
| ILMN_2758878 | TMEM66         | 1.13478407  | 0.00276802 | 0.05133777 | 0.00176049 | 0.03635757 | 0.00043749 | 0.01861404 | 0.00091474 | 0.029733662 | 0 | 0.003149577 | 0.07483876 |
| ILMN_3160137 | ALDOC          | 1.134554634 | 0.0076447  | 0.09672601 | 0.00583002 | 0.07876136 | 0.00082471 | 0.02769675 | 0.0021101  | 0.048647455 | 0 | 0.012022966 | 0.14955451 |
| ILMN_1218051 | IQGAP2         | 1.134418217 | 0.00149689 | 0.03478153 | 0.00122569 | 0.02881591 | 0.0000255  | 0.00246014 | 0.0000551  | 0.00457056  | 1 | 0.000643    | 0.03157309 |
| ILMN_1230726 | 5430406J06RIK  | 1.13436247  | 0.00122569 | 0.03054155 | 0.00094262 | 0.02430167 | 0.00022223 | 0.01167751 | 0.0008189  | 0.027904422 | 1 | 0.001581552 | 0.05126497 |
| ILMN_2879614 | ZBP1           | 1.13418419  | 0.0006399  | 0.0211535  | 0.0006399  | 0.01941092 | 0.0000132  | 0.00150968 | 0.0000283  | 0.002963331 | 1 | 0.000255296 | 0.01817016 |
| ILMN_2534207 | LOC380706      | 1.133996759 | 0.0002995  | 0.01489206 | 0.0002995  | 0.01335371 | 3.59E-08   | 0.000018   | 8.2E-09    | 0.0000103   | 1 | 7.68761E-07 | 0.00070164 |
| ILMN_2659739 | IL7R           | 1.133870404 | 0.0002995  | 0.01489206 | 0.0002995  | 0.01335371 | 0.0000625  | 0.00467003 | 0.0000102  | 0.001439966 | 1 | 7.88278E-05 | 0.00901523 |
| ILMN_2958159 | ENO1           | 1.13384821  | 0.0002995  | 0.01489206 | 0.0002995  | 0.01335371 | 0.00000265 | 0.00047116 | 0.0000399  | 0.003729707 | 1 | 0.000329201 | 0.02128238 |

|              |                  |             |            |            |            |            |            |            |            |             |   |             |            |
|--------------|------------------|-------------|------------|------------|------------|------------|------------|------------|------------|-------------|---|-------------|------------|
| ILMN_1257704 | 6030458P06RIK    | 1.133768716 | 0.0006399  | 0.0211535  | 0.0006399  | 0.01941092 | 0.0000499  | 0.00393179 | 0.00019668 | 0.011191632 | 1 | 0.000197175 | 0.01547711 |
| ILMN_2477213 | LOC100045240     | 1.133690768 | 0.0002995  | 0.01489206 | 0.0002995  | 0.01335371 | 2.65E-07   | 0.0000787  | 7.57E-07   | 0.000219513 | 1 | 4.12145E-06 | 0.00171287 |
| ILMN_2513870 | ZAP70            | 1.133508982 | 0.0002995  | 0.01489206 | 0.0002995  | 0.01335371 | 2.43E-07   | 0.0000731  | 0.00000252 | 0.000522839 | 1 | 0.000163531 | 0.01374071 |
| ILMN_1343061 | control_ILMN_134 | 1.133413667 | 0.05896005 | 0.29652912 | 0.05313904 | 0.27805718 | 0.0444304  | 0.27002241 | 0.05091233 | 0.282020251 | 0 | 0.090139534 | 0.39515789 |
| ILMN_1258340 | TCF12            | 1.133249325 | 0.0002995  | 0.01489206 | 0.0002995  | 0.01335371 | 0.0000229  | 0.00226216 | 0.000017   | 0.002131671 | 1 | 2.06483E-05 | 0.00430994 |
| ILMN_2777019 | SPO11            | 1.133035275 | 0.0006399  | 0.0211535  | 0.0006399  | 0.01941092 | 0.00017061 | 0.00961402 | 0.000037   | 0.003539707 | 1 | 0.000157497 | 0.01350097 |
| ILMN_1255907 | ARP2             | 1.132980051 | 0.0002995  | 0.01489206 | 0.0002995  | 0.01335371 | 0.0000147  | 0.00164902 | 0.0000292  | 0.003023837 | 1 | 4.51564E-05 | 0.00675851 |
| ILMN_2449620 | 5830427D02RIK    | 1.132961187 | 0.0002995  | 0.01489206 | 0.0002995  | 0.01335371 | 0.0000477  | 0.00381669 | 0.00019019 | 0.010942585 | 1 | 7.57938E-05 | 0.00879794 |
| ILMN_2477946 | SCL0001464.1_61  | 1.132866527 | 0.0002995  | 0.01489206 | 0.0002995  | 0.01335371 | 0.00000865 | 0.00113789 | 0.000027   | 0.002873981 | 1 | 0.00040803  | 0.02413289 |
| ILMN_2627179 | ELL3             | 1.132790682 | 0.0002995  | 0.01489206 | 0.0002995  | 0.01335371 | 9.29E-09   | 0.00000645 | 1.03E-08   | 0.0000115   | 1 | 1.74307E-07 | 0.00034541 |
| ILMN_1214318 | RASGRP1          | 1.132335612 | 0.0006399  | 0.0211535  | 0.0002995  | 0.01335371 | 0.0000771  | 0.0054869  | 0.0000845  | 0.006173424 | 1 | 0.000873828 | 0.03714525 |
| ILMN_1218206 | KLF13            | 1.132335512 | 0.0020184  | 0.04200694 | 0.00149689 | 0.03284241 | 0.00013977 | 0.00848224 | 0.00056901 | 0.022034784 | 1 | 0.002540648 | 0.06640064 |
| ILMN_1233501 | C530027B15RIK    | 1.132246044 | 0.00122569 | 0.03054155 | 0.00122569 | 0.02881591 | 0.00014451 | 0.00864564 | 0.00060955 | 0.023104722 | 1 | 0.000737547 | 0.0342621  |
| ILMN_1241522 | 4921505C17RIK    | 1.13221457  | 0.0002995  | 0.01489206 | 0.0002995  | 0.01335371 | 6.62E-07   | 0.0001602  | 0.00000201 | 0.000441415 | 1 | 6.16514E-06 | 0.0021257  |
| ILMN_1226239 | INPP4B           | 1.132137878 | 0.00176049 | 0.0385938  | 0.00176049 | 0.03635757 | 0.00019583 | 0.01059928 | 0.00041    | 0.01769293  | 1 | 0.000540669 | 0.02850419 |
| ILMN_2613422 | ITK              | 1.131935528 | 0.0006399  | 0.0211535  | 0.0006399  | 0.01941092 | 0.0000104  | 0.00127268 | 0.000056   | 0.004602895 | 1 | 0.000140602 | 0.01273272 |
| ILMN_2593554 | IGTP             | 1.131930192 | 0.0002995  | 0.01489206 | 0.0002995  | 0.01335371 | 0.0000358  | 0.00314503 | 0.00000464 | 0.000834646 | 1 | 1.67194E-05 | 0.0037966  |
| ILMN_1229804 | LTA              | 1.131546852 | 0.00583002 | 0.08214635 | 0.00252097 | 0.04602629 | 0.00028612 | 0.01388718 | 0.00121075 | 0.035093672 | 0 | 0.008450429 | 0.12538799 |
| ILMN_2607160 | PUM2             | 1.130377924 | 0.0006399  | 0.0211535  | 0.0002995  | 0.01335371 | 0.00000172 | 0.00033587 | 0.00000121 | 0.000298774 | 1 | 2.76434E-05 | 0.00493033 |
| ILMN_3072437 | 6330500D04RIK    | 1.130133265 | 0.00301234 | 0.05440113 | 0.00252097 | 0.04602629 | 0.00089012 | 0.02903745 | 0.0012227  | 0.035284033 | 0 | 0.00210642  | 0.05997046 |
| ILMN_1251170 | AFF4             | 1.130045502 | 0.0002995  | 0.01489206 | 0.0002995  | 0.01335371 | 0.0000524  | 0.00405887 | 0.00011408 | 0.007718214 | 1 | 7.0054E-05  | 0.00846962 |
| ILMN_1246582 | LOC436541        | 1.129946125 | 0.0006399  | 0.0211535  | 0.0006399  | 0.01941092 | 0.0000207  | 0.00211087 | 0.0000462  | 0.004074421 | 1 | 0.000176289 | 0.01444673 |
| ILMN_1244891 | CST7             | 1.1298809   | 0.0002995  | 0.01489206 | 0.0002995  | 0.01335371 | 0.0000285  | 0.00265981 | 0.0000142  | 0.001859837 | 1 | 0.000146035 | 0.01292295 |
| ILMN_2697693 | GRHPR            | 1.129040446 | 0.0006399  | 0.0211535  | 0.0006399  | 0.01941092 | 0.0000147  | 0.00164902 | 0.0000385  | 0.003609572 | 1 | 0.000157497 | 0.01350097 |
| ILMN_1233402 | LOC100045981     | 1.129004666 | 0.0002995  | 0.01489206 | 0.0002995  | 0.01335371 | 1.69E-07   | 0.0000566  | 0.00000129 | 0.000312387 | 1 | 7.03988E-06 | 0.00230764 |
| ILMN_1258864 | BC106179         | 1.128947865 | 0.0002995  | 0.01489206 | 0.0002995  | 0.01335371 | 0.00043723 | 0.01861404 | 0.00059166 | 0.022629221 | 1 | 0.000317538 | 0.02078825 |
| ILMN_1234796 | HSD17B12         | 1.128868369 | 0.0002995  | 0.01489206 | 0.0002995  | 0.01335371 | 0.0000811  | 0.00570333 | 0.00021329 | 0.011819303 | 1 | 0.000197175 | 0.01547711 |
| ILMN_1236595 | SLA2             | 1.128559293 | 0.00176049 | 0.0385938  | 0.00122569 | 0.02881591 | 0.0000231  | 0.00227606 | 0.00024722 | 0.012817366 | 1 | 0.001344859 | 0.0469611  |
| ILMN_1241952 | 6230415M23RIK    | 1.12852499  | 0.0002995  | 0.01489206 | 0.0006399  | 0.01941092 | 0.00028485 | 0.01386905 | 0.00098023 | 0.030953762 | 1 | 0.00148248  | 0.04961268 |
| ILMN_2657980 | FAAH             | 1.128386309 | 0.0002995  | 0.01489206 | 0.0002995  | 0.01335371 | 0.0000342  | 0.00304391 | 0.00014089 | 0.009031912 | 1 | 0.00040803  | 0.02413289 |
| ILMN_2745614 | FAM134B          | 1.127986989 | 0.0002995  | 0.01489206 | 0.0002995  | 0.01335371 | 0.0000227  | 0.00225688 | 0.000034   | 0.003321814 | 1 | 0.000264806 | 0.01861919 |
| ILMN_1240415 | LOC234987        | 1.127947991 | 0.0002995  | 0.01489206 | 0.0002995  | 0.01335371 | 0.0000121  | 0.00143247 | 0.0000715  | 0.005501275 | 1 | 0.000163531 | 0.01374071 |
| ILMN_2552490 | 6720463L11RIK    | 1.127757726 | 0.0006399  | 0.0211535  | 0.0002995  | 0.01335371 | 0.0000289  | 0.00267683 | 0.00012185 | 0.008102409 | 1 | 0.000317538 | 0.02078825 |
| ILMN_2729447 | 9030612M13RIK    | 1.12772184  | 0.0002995  | 0.01489206 | 0.0002995  | 0.01335371 | 0.00000038 | 0.0001073  | 0.00000154 | 0.000360893 | 1 | 1.24004E-05 | 0.00322459 |
| ILMN_1233293 | GBP1             | 1.127491461 | 0.0002995  | 0.01489206 | 0.0002995  | 0.01335371 | 0.00077034 | 0.02679885 | 0.0000253  | 0.002787107 | 1 | 3.39668E-05 | 0.00570777 |
| ILMN_1236105 | FYB              | 1.127293421 | 0.00176049 | 0.0385938  | 0.0020184  | 0.03953445 | 0.00046297 | 0.01920664 | 0.00246862 | 0.053569604 | 0 | 0.003663228 | 0.08166297 |
| ILMN_3009860 | SELL             | 1.126985915 | 0.0006399  | 0.0211535  | 0.0002995  | 0.01335371 | 0.00000258 | 0.00046493 | 0.0000101  | 0.001437553 | 1 | 6.47271E-05 | 0.00803428 |
| ILMN_1217929 | LOC667005        | 1.126757091 | 0.00094262 | 0.02607154 | 0.00094262 | 0.02430167 | 0.00030191 | 0.01442973 | 0.00061251 | 0.023197995 | 1 | 0.000763113 | 0.03482416 |
| ILMN_1219896 | LOC623121        | 1.126643386 | 0.0002995  | 0.01489206 | 0.0006399  | 0.01941092 | 0.00017252 | 0.00966351 | 0.00036014 | 0.0162751   | 1 | 0.000169803 | 0.01418997 |
| ILMN_2808485 | GBP10            | 1.126535797 | 0.00094262 | 0.02607154 | 0.00094262 | 0.02430167 | 0.00089514 | 0.02913696 | 0.00032196 | 0.015214362 | 1 | 0.000903743 | 0.03800048 |
| ILMN_2628271 | LOC100045967     | 1.126530154 | 0.00122569 | 0.03054155 | 0.0006399  | 0.01941092 | 0.00000934 | 0.00118696 | 0.00014347 | 0.009094873 | 1 | 0.001741399 | 0.05411008 |
| ILMN_2959272 | RNU6             | 1.126488141 | 0.0002995  | 0.01489206 | 0.0002995  | 0.01335371 | 0.0001271  | 0.00781497 | 0.0000785  | 0.005894011 | 1 | 5.52021E-05 | 0.00760204 |
| ILMN_1240857 | COX7A1           | 1.126488113 | 0.0002995  | 0.01489206 | 0.0002995  | 0.01335371 | 0.00000712 | 0.00098878 | 0.0000106  | 0.001479487 | 1 | 1.08955E-05 | 0.00300091 |
| ILMN_1248837 | TBXA2R           | 1.126308353 | 0.0006399  | 0.0211535  | 0.0006399  | 0.01941092 | 0.0000496  | 0.00391795 | 0.0000556  | 0.004598957 | 1 | 0.00010758  | 0.01083883 |
| ILMN_1213986 | LOC380617        | 1.126269609 | 0.0002995  | 0.01489206 | 0.0002995  | 0.01335371 | 0.0000257  | 0.00247459 | 0.0000184  | 0.002261567 | 1 | 2.24533E-05 | 0.00440984 |
| ILMN_2565089 | A830083H19RIK    | 1.126188031 | 0.0002995  | 0.01489206 | 0.0002995  | 0.01335371 | 0.0000412  | 0.00347143 | 0.000057   | 0.00465062  | 1 | 3.99889E-05 | 0.00618393 |
| ILMN_2756628 | CMC1             | 1.125722229 | 0.0002995  | 0.01489206 | 0.0002995  | 0.01335371 | 1.76E-09   | 0.00000151 | 6.75E-09   | 0.00000872  | 1 | 3.51784E-07 | 0.00045485 |

|              |                  |             |            |            |            |            |            |            |            |             |   |             |            |
|--------------|------------------|-------------|------------|------------|------------|------------|------------|------------|------------|-------------|---|-------------|------------|
| ILMN_2689307 | SPNB2            | 1.125305551 | 0.0002995  | 0.01489206 | 0.0002995  | 0.01335371 | 0.0000723  | 0.00525285 | 0.00023598 | 0.01249632  | 1 | 0.000284828 | 0.01943975 |
| ILMN_2551741 | 0610010I05RIK    | 1.124918642 | 0.0006399  | 0.0211535  | 0.0006399  | 0.01941092 | 0.00046313 | 0.01920664 | 0.00104266 | 0.032055996 | 1 | 0.000540698 | 0.02850419 |
| ILMN_1343062 | control_ILMN_134 | 1.124836817 | 0.06518171 | 0.31189827 | 0.05958295 | 0.29527363 | 0.05222749 | 0.29304733 | 0.05948765 | 0.305188121 | 0 | 0.168994973 | 0.52187414 |
| ILMN_2749364 | LOC382646        | 1.124580104 | 0.00276802 | 0.05133777 | 0.00176049 | 0.03635757 | 0.0000498  | 0.00393109 | 0.00024533 | 0.01278781  | 0 | 0.002963349 | 0.07240684 |
| ILMN_2784272 | IFNGR2           | 1.124504822 | 0.0020184  | 0.04200694 | 0.00176049 | 0.03635757 | 0.0008594  | 0.02845121 | 0.0016295  | 0.041583456 | 1 | 0.000903743 | 0.03800048 |
| ILMN_1225348 | FAM102A          | 1.12448091  | 0.0002995  | 0.01489206 | 0.0002995  | 0.01335371 | 0.00000714 | 0.00098905 | 0.0000248  | 0.002755904 | 1 | 0.000189968 | 0.01508948 |
| ILMN_2630739 | PHF20L1          | 1.124360297 | 0.00094262 | 0.02607154 | 0.00149689 | 0.03284241 | 0.00051915 | 0.02079588 | 0.00041925 | 0.017887063 | 1 | 0.000393771 | 0.02371136 |
| ILMN_2418366 | 6720427H10RIK    | 1.124259069 | 0.0002995  | 0.01489206 | 0.0002995  | 0.01335371 | 0.00014538 | 0.00867674 | 0.00026831 | 0.013575239 | 1 | 0.000540727 | 0.02850419 |
| ILMN_2846731 | 1110059E24RIK    | 1.124049613 | 0.0002995  | 0.01489206 | 0.0002995  | 0.01335371 | 2.88E-08   | 0.0000149  | 1.45E-07   | 0.0000709   | 1 | 2.15328E-05 | 0.0043202  |
| ILMN_2594855 | PDPK1            | 1.124023837 | 0.0002995  | 0.01489206 | 0.0002995  | 0.01335371 | 0.0000466  | 0.00377453 | 0.0000558  | 0.004598957 | 1 | 0.000189956 | 0.01508948 |
| ILMN_1246543 | SIAT7C           | 1.124022495 | 0.0002995  | 0.01489206 | 0.0002995  | 0.01335371 | 0.00032001 | 0.01501554 | 0.00045251 | 0.018972559 | 1 | 0.000737547 | 0.0342621  |
| ILMN_2614884 | PIA1             | 1.123647984 | 0.0002995  | 0.01489206 | 0.0002995  | 0.01335371 | 0.00000151 | 0.00030356 | 0.00000406 | 0.000761994 | 1 | 1.74444E-05 | 0.00390377 |
| ILMN_1250418 | NPC1             | 1.123625032 | 0.0002995  | 0.01489206 | 0.0002995  | 0.01335371 | 1.39E-07   | 0.0000492  | 2.76E-07   | 0.000109783 | 1 | 2.27642E-06 | 0.00127663 |
| ILMN_2706514 | LOC100046608     | 1.123601186 | 0.00094262 | 0.02607154 | 0.0006399  | 0.01941092 | 0.00010046 | 0.00665173 | 0.00032888 | 0.015447583 | 1 | 0.001581552 | 0.05126497 |
| ILMN_1241924 | ARL6IP5          | 1.123582409 | 0.0002995  | 0.01489206 | 0.0002995  | 0.01335371 | 0.0000299  | 0.00274992 | 0.00010627 | 0.007284834 | 1 | 0.00027463  | 0.01910904 |
| ILMN_2750265 | ELMO1            | 1.123418741 | 0.00122569 | 0.03054155 | 0.00122569 | 0.02881591 | 0.0004071  | 0.01774258 | 0.00092146 | 0.02980611  | 1 | 0.001915982 | 0.05666025 |
| ILMN_2712895 | 4631423B10RIK    | 1.123402203 | 0.0002995  | 0.01489206 | 0.0002995  | 0.01335371 | 0.0000422  | 0.0035217  | 0.00010479 | 0.007215102 | 1 | 0.000176289 | 0.01444673 |
| ILMN_2719139 | AB124611         | 1.122548641 | 0.00122569 | 0.03054155 | 0.0006399  | 0.01941092 | 0.00023483 | 0.0121047  | 0.00029401 | 0.014330244 | 1 | 0.001581552 | 0.05126497 |
| ILMN_2692986 | 2810410P22RIK    | 1.122423336 | 0.00149689 | 0.03478153 | 0.00122569 | 0.02881591 | 0.00015964 | 0.00916202 | 0.00016472 | 0.009931795 | 1 | 0.0007895   | 0.03543767 |
| ILMN_1228333 | PRF1             | 1.122189532 | 0.00276802 | 0.05133777 | 0.00122569 | 0.02881591 | 0.0001055  | 0.00691623 | 0.00012319 | 0.008156571 | 0 | 0.002173782 | 0.0607706  |
| ILMN_2940446 | DGKA             | 1.122160698 | 0.00176049 | 0.0385938  | 0.00149689 | 0.03284241 | 0.0000799  | 0.00565291 | 0.00044116 | 0.018633965 | 1 | 0.003449313 | 0.07881943 |
| ILMN_3034381 | NUP88            | 1.121988063 | 0.00094262 | 0.02607154 | 0.00094262 | 0.02430167 | 0.00011496 | 0.00735062 | 0.00016939 | 0.010108673 | 1 | 0.000246108 | 0.01770572 |
| ILMN_2668387 | CGGBP1           | 1.121946931 | 0.0002995  | 0.01489206 | 0.0002995  | 0.01335371 | 0.00000034 | 0.0000984  | 1.68E-07   | 0.0000078   | 1 | 3.59866E-06 | 0.00158025 |
| ILMN_2592953 | SCG5             | 1.121946089 | 0.0002995  | 0.01489206 | 0.0002995  | 0.01335371 | 0.000026   | 0.00247667 | 0.0000347  | 0.003370075 | 1 | 0.000228655 | 0.01684049 |
| ILMN_1228867 | A130082M07RIK    | 1.121929865 | 0.00094262 | 0.02607154 | 0.0002995  | 0.01335371 | 0.00000462 | 0.00072482 | 0.0000117  | 0.001595024 | 1 | 0.00042277  | 0.02466001 |
| ILMN_2785454 | HIST2H2AB        | 1.121848738 | 0.00898742 | 0.10547593 | 0.00965407 | 0.10652405 | 0.00889504 | 0.11365284 | 0.01039259 | 0.121665992 | 0 | 0.049191671 | 0.30108149 |
| ILMN_2773900 | GLIPR2           | 1.1217158   | 0.0006399  | 0.0211535  | 0.0006399  | 0.01941092 | 6.02E-07   | 0.00014992 | 0.00000244 | 0.000512485 | 1 | 3.83949E-05 | 0.00609954 |
| ILMN_2647102 | ACTL6A           | 1.121390591 | 0.0002995  | 0.01489206 | 0.0002995  | 0.01335371 | 0.00000884 | 0.00115212 | 0.0000424  | 0.00387062  | 1 | 7.57938E-05 | 0.00879794 |
| ILMN_1256574 | NCOA2            | 1.121377157 | 0.00094262 | 0.02607154 | 0.00094262 | 0.02430167 | 0.0000493  | 0.00391165 | 0.00022291 | 0.012129499 | 1 | 0.00040803  | 0.02413289 |
| ILMN_1243902 | A530024C08RIK    | 1.12112103  | 0.0020184  | 0.04200694 | 0.00176049 | 0.03635757 | 0.00045505 | 0.01903079 | 0.00088129 | 0.029196677 | 1 | 0.00305523  | 0.07341857 |
| ILMN_1343048 | control_ILMN_134 | 1.120964441 | 0.0006399  | 0.0211535  | 0.0006399  | 0.01941092 | 0.00023856 | 0.01218903 | 0.00027171 | 0.013620278 | 1 | 0.000934606 | 0.03863507 |
| ILMN_2878979 | TNFAIP8L2        | 1.120676477 | 0.0002995  | 0.01489206 | 0.0002995  | 0.01335371 | 4.64E-07   | 0.00012621 | 0.00000373 | 0.000722783 | 1 | 1.74444E-05 | 0.00390377 |
| ILMN_2887619 | RPS25            | 1.120128473 | 0.03241096 | 0.21464233 | 0.03788279 | 0.2312766  | 0.02525122 | 0.20197503 | 0.03226412 | 0.224678675 | 0 | 0.039320852 | 0.27099019 |
| ILMN_2678724 | DUSP10           | 1.119986223 | 0.0006399  | 0.0211535  | 0.0002995  | 0.01335371 | 0.00021616 | 0.0114725  | 0.00028764 | 0.014123395 | 1 | 0.000379979 | 0.02324165 |
| ILMN_1244135 | ARPC5            | 1.119864481 | 0.00301234 | 0.05440113 | 0.00373333 | 0.05925673 | 0.00703752 | 0.09959734 | 0.00558971 | 0.086699245 | 0 | 0.00450999  | 0.09155774 |
| ILMN_2651297 | 4632428N05RIK    | 1.119607561 | 0.0002995  | 0.01489206 | 0.0002995  | 0.01335371 | 0.00000985 | 0.00121884 | 0.00000212 | 0.00045645  | 1 | 1.35117E-05 | 0.00345566 |
| ILMN_2822842 | 1600014C10RIK    | 1.119392625 | 0.0002995  | 0.01489206 | 0.0002995  | 0.01335371 | 0.0000173  | 0.00183184 | 0.00000567 | 0.00097714  | 1 | 1.97985E-05 | 0.00420804 |
| ILMN_2665545 | RIN3             | 1.119281709 | 0.0002995  | 0.01489206 | 0.0002995  | 0.01335371 | 0.0000502  | 0.0039435  | 0.0000406  | 0.003782136 | 1 | 0.000246108 | 0.01770572 |
| ILMN_2703321 | ANKZF1           | 1.119253    | 0.0002995  | 0.01489206 | 0.0002995  | 0.01335371 | 0.0000123  | 0.0014435  | 0.0000441  | 0.003965776 | 1 | 0.000146035 | 0.01292295 |
| ILMN_1259917 | D330001F19RIK    | 1.119179745 | 0.0002995  | 0.01489206 | 0.0002995  | 0.01335371 | 0.0002103  | 0.01126316 | 0.00034508 | 0.015942739 | 1 | 0.000353739 | 0.02219068 |
| ILMN_1237871 | AMPD1            | 1.119072973 | 0.0002995  | 0.01489206 | 0.0002995  | 0.01335371 | 0.000036   | 0.00314503 | 0.0000107  | 0.001483462 | 1 | 4.70154E-05 | 0.00688184 |
| ILMN_1256950 | NEURL2           | 1.11903277  | 0.0006399  | 0.0211535  | 0.0006399  | 0.01941092 | 0.0000169  | 0.00180017 | 0.0000192  | 0.002327044 | 1 | 3.83949E-05 | 0.00609954 |
| ILMN_1228020 | 1500010G04RIK    | 1.118985348 | 0.00122569 | 0.03054155 | 0.00094262 | 0.02430167 | 0.0000866  | 0.00599563 | 0.00023442 | 0.012474872 | 1 | 0.000934606 | 0.03863507 |
| ILMN_1227573 | IRF7             | 1.118870281 | 0.00397039 | 0.064249   | 0.00397039 | 0.06196763 | 0.0023181  | 0.05257933 | 0.00445393 | 0.076746435 | 0 | 0.002387591 | 0.06387081 |
| ILMN_2726315 | SDF4             | 1.118652369 | 0.00149689 | 0.03478153 | 0.0006399  | 0.01941092 | 0.00000926 | 0.00118448 | 0.0000286  | 0.002983758 | 1 | 0.000621233 | 0.03109305 |
| ILMN_1227907 | GMFG             | 1.11859249  | 0.0002995  | 0.01489206 | 0.0002995  | 0.01335371 | 1.41E-08   | 0.00000898 | 1.13E-07   | 0.0000599   | 1 | 7.03866E-06 | 0.00230764 |
| ILMN_2881296 | TMEM66           | 1.118516263 | 0.0002995  | 0.01489206 | 0.0002995  | 0.01335371 | 0.00000179 | 0.00034718 | 0.00000451 | 0.000814057 | 1 | 1.29447E-05 | 0.00332893 |

|              |                  |             |            |            |            |            |            |             |            |             |   |             |            |
|--------------|------------------|-------------|------------|------------|------------|------------|------------|-------------|------------|-------------|---|-------------|------------|
| ILMN_3043245 | JMJD1A           | 1.118512017 | 0.0002995  | 0.01489206 | 0.0002995  | 0.01335371 | 2.31E-07   | 0.0000712   | 5.23E-07   | 0.000168884 | 1 | 3.93982E-06 | 0.00166715 |
| ILMN_2580159 | C230070D10RIK    | 1.118494179 | 0.00094262 | 0.02607154 | 0.00094262 | 0.02430167 | 0.00055671 | 0.02167037  | 0.00125356 | 0.035750241 | 1 | 0.000712779 | 0.03334445 |
| ILMN_1252472 | ITK              | 1.118457931 | 0.00227139 | 0.04545806 | 0.00276802 | 0.04845153 | 0.0005963  | 0.02265805  | 0.00234006 | 0.051632853 | 0 | 0.001856078 | 0.05577459 |
| ILMN_2828916 | FRMD6            | 1.11830741  | 0.0006399  | 0.0211535  | 0.0006399  | 0.01941092 | 0.00017343 | 0.000968113 | 0.0000582  | 0.004700168 | 1 | 0.000182997 | 0.01471244 |
| ILMN_1257771 | LOC638301        | 1.118249781 | 0.00149689 | 0.03478153 | 0.00094262 | 0.02430167 | 0.0000793  | 0.00561815  | 0.0000839  | 0.006145701 | 1 | 0.001218998 | 0.0445025  |
| ILMN_3002095 | IL27RA           | 1.118221343 | 0.0006399  | 0.0211535  | 0.0006399  | 0.01941092 | 0.0000149  | 0.00166378  | 0.0000489  | 0.004233399 | 1 | 0.000621233 | 0.03109305 |
| ILMN_2658961 | DGKA             | 1.118166028 | 0.00176049 | 0.0385938  | 0.00176049 | 0.03635757 | 0.00026591 | 0.01325214  | 0.00064942 | 0.024048059 | 1 | 0.002314175 | 0.06295874 |
| ILMN_2038771 | control_ILMN_203 | 1.118161322 | 0.06020572 | 0.30013907 | 0.05480359 | 0.28252036 | 0.05700779 | 0.30549638  | 0.05139364 | 0.283318913 | 0 | 0.154914896 | 0.50337338 |
| ILMN_2981801 | HIST1H2AG        | 1.118065046 | 0.00094262 | 0.02607154 | 0.0006399  | 0.01941092 | 0.00037162 | 0.01664832  | 0.00020154 | 0.011374568 | 1 | 0.000504223 | 0.02732257 |
| ILMN_1249710 | E030038D23RIK    | 1.117909411 | 0.0002995  | 0.01489206 | 0.0002995  | 0.01335371 | 0.0000376  | 0.00323771  | 0.00015401 | 0.009469751 | 1 | 0.000306263 | 0.02048222 |
| ILMN_2943057 | ARL5C            | 1.117880079 | 0.00176049 | 0.0385938  | 0.00094262 | 0.02430167 | 0.00042833 | 0.01837561  | 0.00044307 | 0.018680938 | 1 | 0.000763113 | 0.03482416 |
| ILMN_1235856 | 8030474H12RIK    | 1.117810336 | 0.0002995  | 0.01489206 | 0.0002995  | 0.01335371 | 0.00024238 | 0.01232448  | 0.00022154 | 0.012090825 | 1 | 0.000103509 | 0.01061242 |
| ILMN_1247942 | MGEA5            | 1.117806646 | 0.0006399  | 0.0211535  | 0.0006399  | 0.01941092 | 0.00030694 | 0.0145343   | 0.00051962 | 0.020743454 | 1 | 0.00042277  | 0.02466001 |
| ILMN_1258509 | SIT1             | 1.117432738 | 0.0006399  | 0.0211535  | 0.0002995  | 0.01335371 | 0.00015174 | 0.00888405  | 0.00010235 | 0.007068104 | 1 | 0.000237231 | 0.01736224 |
| ILMN_2544056 | HBB-B1           | 1.117213432 | 0.03914176 | 0.23704991 | 0.03599148 | 0.22485976 | 0.02097723 | 0.18409981  | 0.02922158 | 0.212190751 | 0 | 0.025142431 | 0.2182235  |
| ILMN_2729953 | PPM1B            | 1.117036433 | 0.00537037 | 0.07818332 | 0.00537037 | 0.07497442 | 0.00364121 | 0.06763268  | 0.00503541 | 0.081966426 | 0 | 0.008450429 | 0.12538799 |
| ILMN_1219602 | LOC100048770     | 1.116440805 | 0.00397039 | 0.064249   | 0.00373333 | 0.05925673 | 0.00631793 | 0.09355312  | 0.00215116 | 0.049131535 | 0 | 0.004251793 | 0.08882774 |
| ILMN_2681670 | VPS37B           | 1.116406759 | 0.0002995  | 0.01489206 | 0.0002995  | 0.01335371 | 0.00000824 | 0.0010961   | 0.0000174  | 0.002162819 | 1 | 6.22097E-05 | 0.00789013 |
| ILMN_1234955 | 6430573H23RIK    | 1.116406299 | 0.00176049 | 0.0385938  | 0.0020184  | 0.03953445 | 0.00074236 | 0.02603981  | 0.00161499 | 0.04134913  | 1 | 0.002387591 | 0.06387081 |
| ILMN_2582659 | E030040J04RIK    | 1.116391042 | 0.0002995  | 0.01489206 | 0.0002995  | 0.01335371 | 0.0000266  | 0.00251609  | 0.000057   | 0.00465062  | 1 | 0.00010758  | 0.01083883 |
| ILMN_1252514 | C920016N10RIK    | 1.116354745 | 0.00176049 | 0.0385938  | 0.00122569 | 0.02881591 | 0.00015113 | 0.00885986  | 0.00043359 | 0.018347587 | 1 | 0.0007895   | 0.03543767 |
| ILMN_2617433 | ACTB             | 1.11629809  | 0.00397039 | 0.064249   | 0.0032539  | 0.05432415 | 0.00287066 | 0.05995273  | 0.00272663 | 0.057221177 | 0 | 0.00553098  | 0.10148188 |
| ILMN_2738972 | CNOT4            | 1.116182237 | 0.0002995  | 0.01489206 | 0.0002995  | 0.01335371 | 0.0000107  | 0.00130299  | 0.00000896 | 0.00133296  | 1 | 2.65234E-05 | 0.00480383 |
| ILMN_2553280 | 4732470M22RIK    | 1.1161327   | 0.0002995  | 0.01489206 | 0.0002995  | 0.01335371 | 0.00000649 | 0.00093461  | 0.0000318  | 0.003192608 | 1 | 0.000111802 | 0.01097902 |
| ILMN_1238725 | C130086J11RIK    | 1.116108151 | 0.01382667 | 0.13456133 | 0.01513108 | 0.13869555 | 0.01286055 | 0.14095122  | 0.01459273 | 0.14770671  | 0 | 0.023367993 | 0.21022612 |
| ILMN_2998813 | SEMA4F           | 1.115968974 | 0.0002995  | 0.01489206 | 0.0002995  | 0.01335371 | 0.0000207  | 0.00221087  | 0.0000384  | 0.003609572 | 1 | 8.86334E-05 | 0.00982291 |
| ILMN_1236445 | 9130227N12RIK    | 1.115922245 | 0.00252097 | 0.04839275 | 0.00176049 | 0.03635757 | 0.00096123 | 0.03064541  | 0.0019356  | 0.046142977 | 1 | 0.00305523  | 0.07341857 |
| ILMN_1220893 | ZFP281           | 1.115869505 | 0.0002995  | 0.01489206 | 0.0002995  | 0.01335371 | 0.00000124 | 0.00026043  | 8.12E-07   | 0.000227616 | 1 | 5.3945E-06  | 0.00202516 |
| ILMN_2417398 | IGHV10S1_AF0644  | 1.115826459 | 0.00490758 | 0.07399298 | 0.0056004  | 0.0767776  | 0.00919199 | 0.1159197   | 0.0048635  | 0.080501378 | 0 | 0.005531174 | 0.10148188 |
| ILMN_1238893 | LIME1            | 1.115781178 | 0.00176049 | 0.0385938  | 0.0006399  | 0.01941092 | 0.00012493 | 0.00775324  | 0.00014361 | 0.009094873 | 1 | 0.001141234 | 0.04287409 |
| ILMN_2706550 | SUSD3            | 1.115744092 | 0.00122569 | 0.03054155 | 0.00094262 | 0.02430167 | 0.00014378 | 0.00861922  | 0.00016702 | 0.010005399 | 1 | 0.000816732 | 0.0360345  |
| ILMN_1242235 | TOP2A            | 1.115488708 | 0.0006399  | 0.0211535  | 0.0002995  | 0.01335371 | 9.23E-07   | 0.00020859  | 0.00000447 | 0.00081037  | 1 | 7.28705E-05 | 0.00865281 |
| ILMN_2638923 | RN18S            | 1.115471516 | 0.00301234 | 0.05440113 | 0.00583002 | 0.07876136 | 0.00712305 | 0.10016817  | 0.00794885 | 0.10463667  | 0 | 0.002620495 | 0.06768933 |
| ILMN_1232894 | ZNRF1            | 1.115445926 | 0.0002995  | 0.01489206 | 0.0002995  | 0.01335371 | 0.0000217  | 0.00217431  | 0.0000588  | 0.004724126 | 1 | 0.00010758  | 0.01083883 |
| ILMN_1218799 | EMB              | 1.115430499 | 0.0002995  | 0.01489206 | 0.0002995  | 0.01335371 | 0.00000545 | 0.00080859  | 0.00000586 | 0.00100296  | 1 | 1.04339E-05 | 0.00292569 |
| ILMN_1257209 | WIPF1            | 1.115376002 | 0.0002995  | 0.01489206 | 0.0002995  | 0.01335371 | 0.0000145  | 0.00163779  | 0.000022   | 0.002530716 | 1 | 9.57926E-05 | 0.01018072 |
| ILMN_2711705 | DUSP11           | 1.115060696 | 0.0002995  | 0.01489206 | 0.0002995  | 0.01335371 | 1.99E-07   | 0.0000652   | 0.0000011  | 0.000288061 | 1 | 3.99889E-05 | 0.00618393 |
| ILMN_1236202 | C430015M08RIK    | 1.114991211 | 0.0006399  | 0.0211535  | 0.00094262 | 0.02430167 | 0.00030256 | 0.01442973  | 0.00099864 | 0.031261571 | 1 | 0.002041151 | 0.05875662 |
| ILMN_1233474 | IL2RA            | 1.114952254 | 0.00809366 | 0.10014632 | 0.00537037 | 0.07497442 | 0.00167948 | 0.04316669  | 0.00320035 | 0.063041403 | 0 | 0.005220076 | 0.09861156 |
| ILMN_2762863 | AI606181         | 1.114892504 | 0.0006399  | 0.0211535  | 0.0002995  | 0.01335371 | 0.00019259 | 0.01044808  | 0.00019794 | 0.011235697 | 1 | 0.0007895   | 0.03543767 |
| ILMN_2644350 | THY1             | 1.114766581 | 0.00094262 | 0.02607154 | 0.0006399  | 0.01941092 | 0.0000457  | 0.00372533  | 0.00012026 | 0.008031164 | 1 | 0.002463032 | 0.06525142 |
| ILMN_1255860 | KLRD1            | 1.114664485 | 0.0002995  | 0.01489206 | 0.0002995  | 0.01335371 | 0.00017959 | 0.00990444  | 0.0000691  | 0.005350074 | 1 | 0.000183009 | 0.01471244 |
| ILMN_2636403 | AXUD1            | 1.11465607  | 0.0002995  | 0.01489206 | 0.0002995  | 0.01335371 | 9.85E-07   | 0.00021734  | 6.14E-07   | 0.00018775  | 1 | 1.08955E-05 | 0.00300091 |
| ILMN_2918002 | GBP3             | 1.114435116 | 0.00094262 | 0.02607154 | 0.0002995  | 0.01335371 | 0.00057359 | 0.02206532  | 0.00015319 | 0.009469751 | 1 | 0.0007895   | 0.03543767 |
| ILMN_2649068 | IRF1             | 1.114384547 | 0.00719408 | 0.09294718 | 0.00719408 | 0.09003289 | 0.00662885 | 0.09604617  | 0.00588889 | 0.088967898 | 0 | 0.006383386 | 0.10923805 |
| ILMN_1215939 | TRBV13-1_M1561   | 1.114252325 | 0.0006399  | 0.0211535  | 0.0006399  | 0.01941092 | 0.0000276  | 0.00258118  | 0.000058   | 0.004693744 | 1 | 0.000111795 | 0.01097902 |
| ILMN_2520264 | 201001618RIK     | 1.114246403 | 0.00122569 | 0.03054155 | 0.00149689 | 0.03284241 | 0.00065214 | 0.02390174  | 0.00109041 | 0.033000801 | 1 | 0.001389407 | 0.04772897 |



|              |               |             |            |            |            |            |            |             |            |             |   |             |            |
|--------------|---------------|-------------|------------|------------|------------|------------|------------|-------------|------------|-------------|---|-------------|------------|
| ILMN_1220889 | NBR1          | 1.114192214 | 0.0002995  | 0.01489206 | 0.0002995  | 0.01335371 | 0.00041846 | 0.01811912  | 0.0000489  | 0.004233399 | 1 | 0.000103509 | 0.01061242 |
| ILMN_2706803 | CRLF3         | 1.114104774 | 0.0002995  | 0.01489206 | 0.0002995  | 0.01335371 | 0.00012104 | 0.00760514  | 0.0000382  | 0.003601497 | 1 | 0.000212368 | 0.01604723 |
| ILMN_2751603 | PHXR4         | 1.11385586  | 0.00876432 | 0.0143511  | 0.01317262 | 0.12756294 | 0.00581702 | 0.08937751  | 0.01967293 | 0.172805787 | 0 | 0.017311316 | 0.18018556 |
| ILMN_1240030 | NFATC3        | 1.113638258 | 0.0002995  | 0.01489206 | 0.0002995  | 0.01335371 | 0.0000187  | 0.000193661 | 0.000099   | 0.006922165 | 1 | 0.000204639 | 0.01592867 |
| ILMN_1242390 | ACTN4         | 1.113610426 | 0.0067415  | 0.08943186 | 0.00537037 | 0.07497442 | 0.00225911 | 0.05195492  | 0.00310551 | 0.061933186 | 0 | 0.002963349 | 0.07240684 |
| ILMN_2510694 | NME7          | 1.113521644 | 0.0020184  | 0.04200694 | 0.00176049 | 0.03635757 | 0.00018011 | 0.0099096   | 0.0002504  | 0.012926945 | 1 | 0.002540648 | 0.06640064 |
| ILMN_1258466 | LOC380623     | 1.113479163 | 0.00149689 | 0.03478153 | 0.00122569 | 0.02881591 | 0.0000863  | 0.00599563  | 0.00049148 | 0.020138305 | 1 | 0.001104095 | 0.04229821 |
| ILMN_1252089 | NFATC3        | 1.113257321 | 0.00094262 | 0.02607154 | 0.0006399  | 0.01941092 | 0.00044981 | 0.01893053  | 0.00134792 | 0.037368442 | 1 | 0.001344859 | 0.0469611  |
| ILMN_2522571 | SETD7         | 1.113080478 | 0.0002995  | 0.01489206 | 0.0002995  | 0.01335371 | 0.0001715  | 0.00962449  | 0.0000765  | 0.005770769 | 1 | 1.81978E-05 | 0.00399552 |
| ILMN_2593002 | ST6GAL2       | 1.113003988 | 0.0002995  | 0.01489206 | 0.0002995  | 0.01335371 | 0.0000472  | 0.00380085  | 0.00000968 | 0.001390556 | 1 | 4.89467E-05 | 0.00705363 |
| ILMN_1248379 | EG434077      | 1.112625375 | 0.0002995  | 0.01489206 | 0.0002995  | 0.01335371 | 0.0000115  | 0.00138752  | 0.000012   | 0.001629081 | 1 | 1.53585E-05 | 0.00359242 |
| ILMN_1223119 | BCL11B        | 1.112508226 | 0.0020184  | 0.04200694 | 0.00122569 | 0.02881591 | 0.0000582  | 0.00441806  | 0.00012873 | 0.008463041 | 1 | 0.000688785 | 0.03268184 |
| ILMN_3059798 | FOKK1         | 1.112313504 | 0.00122569 | 0.03054155 | 0.00094262 | 0.02430167 | 0.00017816 | 0.00984919  | 0.00028068 | 0.013898949 | 1 | 0.000688785 | 0.03268184 |
| ILMN_2534794 | LOC236170     | 1.112310228 | 0.0051392  | 0.07619761 | 0.00420612 | 0.06441203 | 0.00030301 | 0.01443599  | 0.00092888 | 0.029963118 | 0 | 0.002620495 | 0.06768933 |
| ILMN_2618549 | RAB7          | 1.112121637 | 0.0006399  | 0.0211535  | 0.00122569 | 0.02881591 | 0.00187936 | 0.0464569   | 0.00194545 | 0.046343295 | 1 | 0.001915982 | 0.05666025 |
| ILMN_2468405 | 5630401D06RIK | 1.111986642 | 0.0002995  | 0.01489206 | 0.0002995  | 0.01335371 | 2.09E-07   | 0.0000667   | 0.00000224 | 0.00047443  | 1 | 9.99008E-06 | 0.00281847 |
| ILMN_1258587 | LOC100044376  | 1.111863958 | 0.0002995  | 0.01489206 | 0.0002995  | 0.01335371 | 0.00000504 | 0.00076175  | 0.00000641 | 0.001075031 | 1 | 2.76413E-05 | 0.00493033 |
| ILMN_1218732 | 2810426P10RIK | 1.11161873  | 0.0002995  | 0.01489206 | 0.0002995  | 0.01335371 | 0.0000688  | 0.00501883  | 0.00013675 | 0.008839595 | 1 | 0.000183009 | 0.01471244 |
| ILMN_1237980 | 0610010D24RIK | 1.111616983 | 0.0006399  | 0.0211535  | 0.0002995  | 0.01335371 | 0.00014715 | 0.00873651  | 0.00031915 | 0.015112162 | 1 | 0.000486846 | 0.02669165 |
| ILMN_1214874 | LOC386068     | 1.111606821 | 0.00094262 | 0.02607154 | 0.0002995  | 0.01335371 | 0.0000748  | 0.0053805   | 0.0001023  | 0.007068104 | 1 | 0.000844832 | 0.03651291 |
| ILMN_1220418 | HGST          | 1.111606518 | 0.0002995  | 0.01489206 | 0.0002995  | 0.01335371 | 0.0001505  | 0.0085642   | 0.0000483  | 0.004205779 | 1 | 5.74463E-05 | 0.00761864 |
| ILMN_2550291 | 2310032M22RIK | 1.111606315 | 0.0006399  | 0.0211535  | 0.0006399  | 0.01941092 | 0.00010944 | 0.00711397  | 0.00012106 | 0.008061295 | 1 | 0.000135361 | 0.01242731 |
| ILMN_1234202 | PHIP          | 1.111345184 | 0.0002995  | 0.01489206 | 0.00094262 | 0.02430167 | 0.00090293 | 0.02928231  | 0.00134681 | 0.037363102 | 1 | 0.000486846 | 0.02669165 |
| ILMN_2426949 | TNFRSF14      | 1.111293325 | 0.0006399  | 0.0211535  | 0.0006399  | 0.01941092 | 0.0000768  | 0.00547429  | 0.00020508 | 0.011473406 | 1 | 0.000453754 | 0.02560106 |
| ILMN_2497395 | 9130004J05RIK | 1.111130133 | 0.00122569 | 0.03054155 | 0.00122569 | 0.02881591 | 0.00027804 | 0.01366608  | 0.00076296 | 0.026721993 | 1 | 0.002106509 | 0.05997046 |
| ILMN_2175730 | SPN           | 1.111033738 | 0.0002995  | 0.01489206 | 0.0006399  | 0.01941092 | 0.0000115  | 0.00138491  | 0.0000749  | 0.005687727 | 1 | 0.000284828 | 0.01943975 |
| ILMN_1217606 | 1500005K14RIK | 1.110936144 | 0.00122569 | 0.03054155 | 0.00149689 | 0.03284241 | 0.00036072 | 0.01628339  | 0.00024226 | 0.012705581 | 1 | 0.000737547 | 0.0342621  |
| ILMN_1216313 | STIM1         | 1.110931979 | 0.00122569 | 0.03054155 | 0.00227139 | 0.0429166  | 0.00138944 | 0.03799885  | 0.00340804 | 0.065686921 | 0 | 0.004644684 | 0.0931111  |
| ILMN_1252761 | DRG1          | 1.110887212 | 0.00122569 | 0.03054155 | 0.0006399  | 0.01941092 | 0.00096761 | 0.03080362  | 0.00048307 | 0.019916078 | 1 | 0.000486846 | 0.02669165 |
| ILMN_2710312 | LOC100046650  | 1.110811588 | 0.0002995  | 0.01489206 | 0.0002995  | 0.01335371 | 0.00000957 | 0.00121086  | 0.0000519  | 0.004442214 | 1 | 0.000470003 | 0.02607676 |
| ILMN_1232668 | MAD           | 1.110784132 | 0.0002995  | 0.01489206 | 0.0002995  | 0.01335371 | 0.00026552 | 0.01324676  | 0.00020949 | 0.011649906 | 1 | 0.000212368 | 0.01604723 |
| ILMN_2593774 | 1190002H23RIK | 1.110704    | 0.0002995  | 0.01489206 | 0.0002995  | 0.01335371 | 0.00000489 | 0.00074347  | 0.00000986 | 0.001403781 | 1 | 6.47271E-05 | 0.00803428 |
| ILMN_2559724 | A130014O09RIK | 1.110598097 | 0.01142074 | 0.12058349 | 0.00876432 | 0.10074305 | 0.00510266 | 0.08281496  | 0.00678734 | 0.095622483 | 0 | 0.005692914 | 0.10310819 |
| ILMN_3002505 | ABHD8         | 1.110530454 | 0.00094262 | 0.02607154 | 0.00094262 | 0.02430167 | 0.0000941  | 0.00638343  | 0.00019979 | 0.011313575 | 1 | 0.000540727 | 0.02850419 |
| ILMN_2441724 | 9430014F16RIK | 1.110454831 | 0.0006399  | 0.0211535  | 0.0006399  | 0.01941092 | 0.00023109 | 0.01201016  | 0.00020319 | 0.011438788 | 1 | 0.000665544 | 0.03206944 |
| ILMN_1229005 | TRAT1         | 1.110421282 | 0.0006399  | 0.0211535  | 0.0006399  | 0.01941092 | 0.00027271 | 0.01347531  | 0.00019498 | 0.011135911 | 1 | 0.001104043 | 0.04229821 |
| ILMN_1229518 | B230340J04RIK | 1.11037499  | 0.0002995  | 0.01489206 | 0.0002995  | 0.01335371 | 0.00000774 | 0.0010503   | 0.00000785 | 0.001234703 | 1 | 9.56597E-06 | 0.00274856 |
| ILMN_2576568 | D130062J21RIK | 1.110225832 | 0.00176049 | 0.0385938  | 0.00276802 | 0.04845153 | 0.0029345  | 0.06072226  | 0.00575947 | 0.08793067  | 0 | 0.004510321 | 0.09155774 |
| ILMN_2491182 | A130010C12RIK | 1.110126472 | 0.01426212 | 0.13687557 | 0.0179397  | 0.15296839 | 0.0043924  | 0.07547173  | 0.01868086 | 0.168124091 | 0 | 0.037563093 | 0.2654797  |
| ILMN_2484278 | 9930031P18RIK | 1.110094091 | 0.00252097 | 0.04839275 | 0.00301234 | 0.05155233 | 0.00533746 | 0.08531507  | 0.00968357 | 0.116862873 | 0 | 0.012022966 | 0.14955451 |
| ILMN_2827780 | D14ERTD668E   | 1.11008286  | 0.0006399  | 0.0211535  | 0.0002995  | 0.01335371 | 0.0000427  | 0.00354604  | 0.0000575  | 0.004674319 | 1 | 0.000642967 | 0.03157309 |
| ILMN_3112873 | TXNIP         | 1.110031984 | 0.00094262 | 0.02607154 | 0.0006399  | 0.01941092 | 0.0001431  | 0.00861123  | 0.0002438  | 0.012729351 | 1 | 0.001141234 | 0.04287409 |
| ILMN_3117602 | CD6           | 1.109929013 | 0.0002995  | 0.01489206 | 0.0002995  | 0.01335371 | 0.00000663 | 0.00094987  | 0.0000261  | 0.002837023 | 1 | 0.000197163 | 0.01547711 |
| ILMN_1233424 | LBCL1         | 1.109898196 | 0.0002995  | 0.01489206 | 0.0002995  | 0.01335371 | 0.0000427  | 0.00354604  | 0.0000532  | 0.004485638 | 1 | 0.000103509 | 0.01061242 |
| ILMN_2681601 | SLC44A2       | 1.109888463 | 0.010097   | 0.11285122 | 0.00854165 | 0.09937884 | 0.00254344 | 0.05584417  | 0.0068766  | 0.096328868 | 0 | 0.009432203 | 0.13248473 |
| ILMN_2762956 | SPCS2         | 1.109838126 | 0.0002995  | 0.01489206 | 0.0002995  | 0.01335371 | 0.0000411  | 0.00346811  | 0.00013104 | 0.00859081  | 1 | 0.000189968 | 0.01508948 |
| ILMN_2632230 | D2ERTD391E    | 1.109720922 | 0.0002995  | 0.01489206 | 0.0002995  | 0.01335371 | 0.00000699 | 0.00098038  | 0.0000266  | 0.002856495 | 1 | 0.000317538 | 0.02078825 |

|              |               |             |            |            |            |            |            |            |            |             |   |             |            |
|--------------|---------------|-------------|------------|------------|------------|------------|------------|------------|------------|-------------|---|-------------|------------|
| ILMN_3052501 | CD27          | 1.109550882 | 0.00094262 | 0.02607154 | 0.0006399  | 0.01941092 | 0.0000571  | 0.00436027 | 0.00011777 | 0.007898943 | 1 | 0.000966442 | 0.03935694 |
| ILMN_2615096 | DPP4          | 1.109531905 | 0.0002995  | 0.01489206 | 0.0002995  | 0.01335371 | 4.24E-07   | 0.00011758 | 2.57E-07   | 0.000106375 | 1 | 2.49646E-06 | 0.00133566 |
| ILMN_2629112 | ASAH3L        | 1.109478785 | 0.0002995  | 0.01489206 | 0.0002995  | 0.01335371 | 0.0000279  | 0.00260327 | 0.0000227  | 0.002596277 | 1 | 3.53859E-05 | 0.0058616  |
| ILMN_1254916 | LOC386508     | 1.109314765 | 0.00094262 | 0.02607154 | 0.0006399  | 0.01941092 | 0.0000268  | 0.00252935 | 0.00029189 | 0.014258943 | 1 | 0.002106509 | 0.00597046 |
| ILMN_2686115 | RAPGEF6       | 1.109219239 | 0.00605844 | 0.08369461 | 0.00444101 | 0.06659434 | 0.00124244 | 0.03553479 | 0.00286075 | 0.059099453 | 0 | 0.008219665 | 0.12365894 |
| ILMN_3153010 | SLITRK5       | 1.109095163 | 0.0002995  | 0.01489206 | 0.0002995  | 0.01335371 | 0.00015814 | 0.00910989 | 0.0000467  | 0.004101953 | 1 | 5.97852E-05 | 0.00777325 |
| ILMN_2571616 | C430002D13RIK | 1.109088506 | 0.00122569 | 0.03054155 | 0.0020184  | 0.03953445 | 0.00120471 | 0.03493809 | 0.00223335 | 0.05034168  | 0 | 0.001797898 | 0.05487657 |
| ILMN_1231785 | HDAC2         | 1.10904434  | 0.0006399  | 0.0211535  | 0.0002995  | 0.01335371 | 0.00011044 | 0.00713983 | 0.00026456 | 0.013458572 | 1 | 0.000237231 | 0.01736224 |
| ILMN_1221831 | TCFAP2E       | 1.10874714  | 0.00176049 | 0.0385938  | 0.00176049 | 0.03635757 | 0.0006064  | 0.02285402 | 0.00061856 | 0.023351316 | 1 | 0.001344859 | 0.0469611  |
| ILMN_2646456 | RNPC2         | 1.108556752 | 0.00397039 | 0.064249   | 0.00349473 | 0.0566205  | 0.00206214 | 0.04929958 | 0.00297458 | 0.060346491 | 0 | 0.003346676 | 0.07734743 |
| ILMN_2504686 | MT-ATP6       | 1.108358727 | 0.00876432 | 0.1043511  | 0.00898742 | 0.10212898 | 0.006843   | 0.09776578 | 0.01129715 | 0.127943658 | 0 | 0.013719454 | 0.16025079 |
| ILMN_2712867 | TIMP2         | 1.108193843 | 0.0002995  | 0.01489206 | 0.0002995  | 0.01335371 | 0.0000462  | 0.00374496 | 0.0000657  | 0.005137493 | 1 | 5.74504E-05 | 0.00761864 |
| ILMN_1234006 | LOC277136     | 1.10816163  | 0.00373333 | 0.06184411 | 0.0020184  | 0.03953445 | 0.0000764  | 0.00546326 | 0.00034246 | 0.015876812 | 0 | 0.001104095 | 0.04229821 |
| ILMN_2965669 | XLR4A         | 1.108141291 | 0.0002995  | 0.01489206 | 0.0002995  | 0.01335371 | 0.00000486 | 0.00074167 | 0.00000396 | 0.000746457 | 1 | 1.23984E-05 | 0.00322459 |
| ILMN_2447538 | L210018M11RIK | 1.10801562  | 0.0006399  | 0.0211535  | 0.0006399  | 0.01941092 | 0.0000305  | 0.00278714 | 0.0000653  | 0.005121772 | 1 | 0.000306263 | 0.02048222 |
| ILMN_1222917 | PTPN1         | 1.107980121 | 0.0032539  | 0.05678214 | 0.00373333 | 0.05925673 | 0.00204418 | 0.04892042 | 0.00362761 | 0.068031509 | 0 | 0.007351981 | 0.11667667 |
| ILMN_1255086 | Z810454F19RIK | 1.107686745 | 0.0067415  | 0.08943186 | 0.00651414 | 0.08446632 | 0.00242497 | 0.05418861 | 0.00487539 | 0.080587642 | 0 | 0.007351739 | 0.11667667 |
| ILMN_1233554 | PBRM1         | 1.107679536 | 0.00149689 | 0.03478153 | 0.00094262 | 0.02430167 | 0.00059016 | 0.02253483 | 0.00040478 | 0.01751061  | 1 | 0.000844832 | 0.03651291 |
| ILMN_1234072 | PDLIM1        | 1.107488297 | 0.0002995  | 0.01489206 | 0.0002995  | 0.01335371 | 0.0000459  | 0.00372562 | 0.0000726  | 0.005551592 | 1 | 0.000306263 | 0.02048222 |
| ILMN_1216561 | CAMK2D        | 1.107443275 | 0.00122569 | 0.03054155 | 0.00094262 | 0.02430167 | 0.00076398 | 0.02667747 | 0.00134692 | 0.037363102 | 1 | 0.00305523  | 0.07341857 |
| ILMN_2590638 | BCL2L11       | 1.107365706 | 0.00122569 | 0.03054155 | 0.00122569 | 0.02881591 | 0.0000915  | 0.00623516 | 0.0000482  | 0.004197605 | 1 | 0.000176289 | 0.01444673 |
| ILMN_2705878 | LIMD2         | 1.107359113 | 0.0002995  | 0.01489206 | 0.0002995  | 0.01335371 | 0.00000896 | 0.00116209 | 0.00000904 | 0.001335714 | 1 | 6.22097E-05 | 0.00789013 |
| ILMN_1227100 | E130112E08RIK | 1.107230432 | 0.0020184  | 0.04200694 | 0.00276802 | 0.04845153 | 0.00208027 | 0.04952957 | 0.00135255 | 0.037429791 | 1 | 0.00040803  | 0.02413289 |
| ILMN_1254814 | CLK1          | 1.10722634  | 0.00094262 | 0.02607154 | 0.00094262 | 0.02430167 | 0.00022953 | 0.01197773 | 0.00041438 | 0.017763501 | 1 | 0.00099928  | 0.0402366  |
| ILMN_2986458 | TERF2IP       | 1.107174717 | 0.0002995  | 0.01489206 | 0.0002995  | 0.01335371 | 0.00036565 | 0.01644438 | 0.00025266 | 0.013009278 | 1 | 0.000470028 | 0.02607676 |
| ILMN_1239729 | KIF1B         | 1.106854993 | 0.0006399  | 0.0211535  | 0.0006399  | 0.01941092 | 0.00137718 | 0.03773799 | 0.00099268 | 0.031178183 | 1 | 0.000504223 | 0.02732257 |
| ILMN_1217480 | LOC100046080  | 1.106833133 | 0.00696781 | 0.09115463 | 0.00490758 | 0.07073729 | 0.00117721 | 0.03450589 | 0.00170887 | 0.042787906 | 0 | 0.004379328 | 0.09051712 |
| ILMN_2652857 | IFI47         | 1.106721599 | 0.00943231 | 0.10825947 | 0.0076447  | 0.09407685 | 0.0082845  | 0.10948849 | 0.00387692 | 0.070436711 | 0 | 0.006383169 | 0.10923805 |
| ILMN_1257107 | LOC100043821  | 1.106674621 | 0.0006399  | 0.0211535  | 0.0006399  | 0.01941092 | 0.00054092 | 0.02135537 | 0.00117775 | 0.034456682 | 1 | 0.001179524 | 0.04378253 |
| ILMN_2636339 | IRF9          | 1.106644992 | 0.00252097 | 0.04839275 | 0.00094262 | 0.02430167 | 0.00029795 | 0.01428302 | 0.00076743 | 0.026757653 | 1 | 0.00270263  | 0.06885567 |
| ILMN_2479848 | SIF1          | 1.106503824 | 0.0002995  | 0.01489206 | 0.0002995  | 0.01335371 | 3.51E-08   | 0.0000177  | 2.82E-07   | 0.000110081 | 1 | 5.89482E-06 | 0.0021116  |
| ILMN_1226514 | GAB3          | 1.106492684 | 0.0002995  | 0.01489206 | 0.0002995  | 0.01335371 | 0.00000136 | 0.0002775  | 2.37E-07   | 0.000101599 | 1 | 6.1646E-06  | 0.0021257  |
| ILMN_3141048 | SEPP1         | 1.106305884 | 0.00149689 | 0.03478153 | 0.00094262 | 0.02430167 | 0.00028342 | 0.01382831 | 0.0001664  | 0.009994028 | 1 | 0.000643    | 0.03157309 |
| ILMN_2635871 | 3110057O12RIK | 1.106105831 | 0.0006399  | 0.0211535  | 0.0006399  | 0.01941092 | 0.00015081 | 0.00885986 | 0.00020499 | 0.011473406 | 1 | 0.000643034 | 0.03157309 |
| ILMN_2829625 | NTNG1         | 1.106001213 | 0.00122569 | 0.03054155 | 0.00122569 | 0.02881591 | 0.00014765 | 0.00875482 | 0.00041707 | 0.017826837 | 1 | 0.000438006 | 0.02507734 |
| ILMN_2635132 | FOXP3         | 1.105736567 | 0.0006399  | 0.0211535  | 0.0002995  | 0.01335371 | 0.00000368 | 0.00061365 | 0.00000951 | 0.00136995  | 1 | 0.001301631 | 0.04617913 |
| ILMN_1225109 | Z310047C21RIK | 1.105585656 | 0.00094262 | 0.02607154 | 0.00094262 | 0.02430167 | 0.00023145 | 0.01201016 | 0.00046395 | 0.019281568 | 1 | 0.000559888 | 0.02915112 |
| ILMN_1228653 | ZBP1          | 1.105391357 | 0.00898742 | 0.10547593 | 0.00809366 | 0.09652695 | 0.00364092 | 0.06763268 | 0.00593208 | 0.089284737 | 0 | 0.011706901 | 0.14779526 |
| ILMN_1236585 | LOC634213     | 1.105197029 | 0.0032539  | 0.05678214 | 0.00149689 | 0.03284241 | 0.00010667 | 0.00697357 | 0.00036187 | 0.016337543 | 0 | 0.001797898 | 0.05487657 |
| ILMN_1227803 | LOC674707     | 1.105118227 | 0.0006399  | 0.0211535  | 0.00094262 | 0.02430167 | 0.00000863 | 0.00113739 | 0.0000456  | 0.00403955  | 1 | 7.28705E-05 | 0.00865281 |
| ILMN_2706631 | LOC100048076  | 1.105000545 | 0.0002995  | 0.01489206 | 0.0002995  | 0.01335371 | 5.68E-07   | 0.00014379 | 0.00000114 | 0.000290477 | 1 | 7.68769E-06 | 0.0024016  |
| ILMN_2949605 | UBAC2         | 1.104949833 | 0.0002995  | 0.01489206 | 0.0002995  | 0.01335371 | 4.68E-07   | 0.00012677 | 0.00000161 | 0.000370841 | 1 | 7.28705E-05 | 0.00865281 |
| ILMN_2651054 | LOC100047173  | 1.104947245 | 0.00122569 | 0.03054155 | 0.00094262 | 0.02430167 | 0.0001854  | 0.01012894 | 0.00020712 | 0.011559512 | 1 | 0.002540648 | 0.06640064 |
| ILMN_2691192 | RBBP7         | 1.104851088 | 0.00741953 | 0.09487807 | 0.01186014 | 0.12006629 | 0.0247443  | 0.19992306 | 0.01812994 | 0.165469515 | 0 | 0.013719454 | 0.16025079 |
| ILMN_2569336 | A130024J05RIK | 1.104817015 | 0.00965407 | 0.11001819 | 0.01031818 | 0.11074271 | 0.00502937 | 0.08208706 | 0.00762986 | 0.10204046  | 0 | 0.012022966 | 0.14955451 |
| ILMN_1222346 | A630097D09RIK | 1.104807842 | 0.0002995  | 0.01489206 | 0.0002995  | 0.01335371 | 0.00000699 | 0.00098038 | 0.0000116  | 0.001590823 | 1 | 1.60246E-05 | 0.00367466 |
| ILMN_1255419 | ZFPN1A1       | 1.10475855  | 0.00122569 | 0.03054155 | 0.00122569 | 0.02881591 | 0.00023251 | 0.01202516 | 0.00046107 | 0.019196381 | 1 | 0.001633268 | 0.05224999 |

|              |               |             |            |            |            |            |            |            |            |             |   |             |            |
|--------------|---------------|-------------|------------|------------|------------|------------|------------|------------|------------|-------------|---|-------------|------------|
| ILMN_2704822 | ACAA2         | 1.104751617 | 0.00227139 | 0.04545806 | 0.00227139 | 0.0429166  | 0.00073722 | 0.02599654 | 0.00150758 | 0.039781954 | 1 | 0.002041151 | 0.05875662 |
| ILMN_2595967 | LOC100039532  | 1.104726083 | 0.0002995  | 0.01489206 | 0.0002995  | 0.01335371 | 0.0000399  | 0.00337413 | 0.0000835  | 0.006132211 | 1 | 0.000353719 | 0.02219068 |
| ILMN_2628174 | ACSS1         | 1.104609544 | 0.0002995  | 0.01489206 | 0.0002995  | 0.01335371 | 0.00000673 | 0.00095405 | 0.00000329 | 0.000651535 | 1 | 5.51982E-05 | 0.00760204 |
| ILMN_2457324 | TSSC1         | 1.10460787  | 0.00094262 | 0.02607154 | 0.0006399  | 0.01941092 | 0.00037762 | 0.01683607 | 0.00068122 | 0.024908549 | 1 | 0.001301631 | 0.04617913 |
| ILMN_2631994 | HEXIM1        | 1.104522651 | 0.0002995  | 0.01489206 | 0.0002995  | 0.01335371 | 7.94E-07   | 0.00018585 | 5.26E-07   | 0.000168884 | 1 | 3.28593E-06 | 0.00154495 |
| ILMN_2544890 | PDE4B         | 1.104516163 | 0.00276802 | 0.05133777 | 0.0032539  | 0.05432415 | 0.00144645 | 0.03905335 | 0.00467606 | 0.078680163 | 0 | 0.00388914  | 0.08408165 |
| ILMN_2696491 | PHF11         | 1.104484414 | 0.00420612 | 0.06669083 | 0.00252097 | 0.04602629 | 0.00130622 | 0.0366489  | 0.00177754 | 0.04368478  | 0 | 0.003888993 | 0.08408165 |
| ILMN_2775098 | CYB5          | 1.104384533 | 0.0002995  | 0.01489206 | 0.0002995  | 0.01335371 | 0.00000016 | 0.0000542  | 3.92E-07   | 0.00013797  | 1 | 5.89742E-06 | 0.0021116  |
| ILMN_2880467 | LASS4         | 1.104325447 | 0.00227139 | 0.04545806 | 0.00176049 | 0.03635757 | 0.00059615 | 0.02265805 | 0.00077485 | 0.026955849 | 1 | 0.00099928  | 0.0402366  |
| ILMN_2812244 | MPPE1         | 1.104198108 | 0.0002995  | 0.01489206 | 0.0002995  | 0.01335371 | 0.00000576 | 0.00084519 | 0.00000933 | 0.001361621 | 1 | 4.33673E-05 | 0.0065968  |
| ILMN_3133748 | GAB3          | 1.1040901   | 0.00149689 | 0.03478153 | 0.00122569 | 0.02881591 | 0.000026   | 0.00247667 | 0.0001002  | 0.00697141  | 1 | 0.000600122 | 0.03046224 |
| ILMN_2518828 | ZNF24         | 1.104037027 | 0.0006399  | 0.0211535  | 0.0002995  | 0.01335371 | 0.0000988  | 0.00658207 | 0.00018603 | 0.010797146 | 1 | 0.00011618  | 0.0112429  |
| ILMN_1258965 | TMEM66        | 1.10397338  | 0.00094262 | 0.02607154 | 0.00094262 | 0.02430167 | 0.00012203 | 0.00760514 | 0.00027116 | 0.013615504 | 1 | 0.0007895   | 0.03543767 |
| ILMN_1237886 | ENC1          | 1.103956093 | 0.0006399  | 0.0211535  | 0.0002995  | 0.01335371 | 0.0000265  | 0.00250371 | 0.0000379  | 0.003587283 | 1 | 0.000135361 | 0.01242731 |
| ILMN_2492102 | LOC630408     | 1.103768241 | 0.0006399  | 0.0211535  | 0.0002995  | 0.01335371 | 0.00021339 | 0.0113638  | 0.00034026 | 0.015806312 | 1 | 0.000966442 | 0.03935694 |
| ILMN_2710166 | DDX3X         | 1.103764891 | 0.0051392  | 0.07619761 | 0.00467484 | 0.06877491 | 0.00321609 | 0.06358903 | 0.00370058 | 0.068707988 | 0 | 0.004510321 | 0.09155774 |
| ILMN_2742928 | FXYD5         | 1.103662574 | 0.0198742  | 0.16408427 | 0.01491383 | 0.13744404 | 0.00597998 | 0.09087506 | 0.00889638 | 0.111496961 | 0 | 0.013017012 | 0.15603988 |
| ILMN_3071525 | CD226         | 1.103645914 | 0.00349473 | 0.05908105 | 0.0020184  | 0.03953445 | 0.00073613 | 0.02597776 | 0.00079434 | 0.027327392 | 0 | 0.001977658 | 0.05767797 |
| ILMN_2720820 | A230046K03RIK | 1.103616266 | 0.0002995  | 0.01489206 | 0.0002995  | 0.01335371 | 0.00000291 | 0.00051317 | 0.0000077  | 0.001222667 | 1 | 8.19763E-05 | 0.00930671 |
| ILMN_1238069 | 4930539E08RIK | 1.103535154 | 0.0002995  | 0.01489206 | 0.0002995  | 0.01335371 | 0.0000032  | 0.00055228 | 0.0000217  | 0.002508955 | 1 | 0.000157497 | 0.01350097 |
| ILMN_1238285 | DCUN1D5       | 1.103527312 | 0.00149689 | 0.03478153 | 0.00149689 | 0.03284241 | 0.00034811 | 0.01594848 | 0.00028909 | 0.014164441 | 1 | 0.000284812 | 0.01943975 |
| ILMN_1234133 | 3632431M01RIK | 1.103406406 | 0.00094262 | 0.02607154 | 0.0006399  | 0.01941092 | 0.00032    | 0.01501554 | 0.00049525 | 0.020203747 | 1 | 0.000284828 | 0.01943975 |
| ILMN_1217705 | C130002K18RIK | 1.103274712 | 0.00831809 | 0.10165638 | 0.01031818 | 0.11074271 | 0.00823865 | 0.10909937 | 0.01077307 | 0.124430321 | 0 | 0.015225452 | 0.168939   |
| ILMN_2614966 | RAB27A        | 1.103217796 | 0.0002995  | 0.01489206 | 0.0002995  | 0.01335371 | 8.05E-08   | 0.0000329  | 2.31E-08   | 0.0000187   | 1 | 1.2393E-06  | 0.00090134 |
| ILMN_1245393 | STXBP3        | 1.103174614 | 0.00397039 | 0.064249   | 0.00227139 | 0.0429166  | 0.0011527  | 0.03421849 | 0.00190089 | 0.045691414 | 0 | 0.00553098  | 0.10148188 |
| ILMN_1239726 | SNAI3         | 1.103168493 | 0.0006399  | 0.0211535  | 0.0006399  | 0.01941092 | 0.0000322  | 0.00289276 | 0.00011372 | 0.007705253 | 1 | 0.000665544 | 0.03206944 |
| ILMN_1223028 | D230020C06RIK | 1.103101789 | 0.0006399  | 0.0211535  | 0.0006399  | 0.01941092 | 0.00028646 | 0.01388928 | 0.00034886 | 0.016068328 | 1 | 0.000873828 | 0.03714525 |
| ILMN_2854878 | NECAP1        | 1.103026603 | 0.0002995  | 0.01489206 | 0.0002995  | 0.01335371 | 0.00000877 | 0.00114799 | 0.0000229  | 0.002603706 | 1 | 8.19763E-05 | 0.00930671 |
| ILMN_1242802 | RAB6          | 1.103017062 | 0.00094262 | 0.02607154 | 0.0006399  | 0.01941092 | 0.00061393 | 0.02295322 | 0.00031887 | 0.015112162 | 1 | 0.001856078 | 0.05577459 |
| ILMN_2535779 | LOC383706     | 1.102993315 | 0.0006399  | 0.0211535  | 0.00094262 | 0.02430167 | 0.00056898 | 0.02197867 | 0.00070261 | 0.025381142 | 1 | 0.001104095 | 0.04229821 |
| ILMN_1228235 | CTSE          | 1.102982206 | 0.00094262 | 0.02607154 | 0.00094262 | 0.02430167 | 0.00029079 | 0.01407    | 0.00018402 | 0.010707081 | 1 | 0.00057968  | 0.02968357 |
| ILMN_3163163 | A430078G23RIK | 1.102898707 | 0.0006399  | 0.0211535  | 0.0006399  | 0.01941092 | 0.00013728 | 0.00835294 | 0.00013654 | 0.008839388 | 1 | 0.00022037  | 0.01646479 |
| ILMN_2732190 | PBRM1         | 1.102890972 | 0.00605844 | 0.08369461 | 0.00397039 | 0.06196763 | 0.00114065 | 0.03401276 | 0.00113476 | 0.033772175 | 0 | 0.013719454 | 0.16025079 |
| ILMN_1246770 | YBX3          | 1.102889488 | 0.00349473 | 0.05908105 | 0.00301234 | 0.05155233 | 0.00358474 | 0.06731425 | 0.00316517 | 0.062746493 | 0 | 0.005858095 | 0.10440833 |
| ILMN_1250135 | A930005H10RIK | 1.102857125 | 0.0006399  | 0.0211535  | 0.0006399  | 0.01941092 | 0.0000434  | 0.00359485 | 0.0000827  | 0.006091257 | 1 | 0.000329201 | 0.02128238 |
| ILMN_3114641 | PIK3R1        | 1.102785193 | 0.0002995  | 0.01489206 | 0.0002995  | 0.01335371 | 0.00000126 | 0.00026389 | 0.00000119 | 0.00029799  | 1 | 1.47177E-05 | 0.00353126 |
| ILMN_2677056 | LOC100048622  | 1.102768087 | 0.0020184  | 0.04200694 | 0.0020184  | 0.03953445 | 0.00246416 | 0.05479494 | 0.00260119 | 0.055447887 | 0 | 0.003774648 | 0.08295494 |
| ILMN_1243042 | LOC381214     | 1.102758352 | 0.0002995  | 0.01489206 | 0.0002995  | 0.01335371 | 0.00000214 | 0.0004015  | 0.0000184  | 0.002263583 | 1 | 4.33673E-05 | 0.0065968  |
| ILMN_2917338 | RNF125        | 1.102623511 | 0.00373333 | 0.06184411 | 0.0032539  | 0.05432415 | 0.00210043 | 0.0498312  | 0.00339438 | 0.065464235 | 0 | 0.00270263  | 0.06885567 |
| ILMN_2433964 | GIGYF1        | 1.102596985 | 0.00176049 | 0.0385938  | 0.00149689 | 0.03284241 | 0.00047117 | 0.01946027 | 0.00035965 | 0.0162751   | 1 | 0.00057968  | 0.02968357 |
| ILMN_2566477 | C730026O12RIK | 1.102585731 | 0.00854165 | 0.10305721 | 0.01076004 | 0.11338366 | 0.00953803 | 0.11842272 | 0.01173891 | 0.130774947 | 0 | 0.012346572 | 0.15195555 |
| ILMN_2704823 | ACAA2         | 1.102584401 | 0.00176049 | 0.0385938  | 0.00122569 | 0.02881591 | 0.00099103 | 0.03127428 | 0.00059447 | 0.022718354 | 1 | 0.001104095 | 0.04229821 |
| ILMN_1249863 | SLAMF1        | 1.102358687 | 0.00149689 | 0.03478153 | 0.00094262 | 0.02430167 | 0.00053162 | 0.02111665 | 0.00018539 | 0.010773166 | 1 | 0.001686537 | 0.05325863 |
| ILMN_2617820 | PPP3CC        | 1.10232076  | 0.0002995  | 0.01489206 | 0.0002995  | 0.01335371 | 5.55E-07   | 0.00014264 | 7.19E-07   | 0.000216047 | 1 | 1.47177E-05 | 0.00353126 |
| ILMN_1238109 | PP11R         | 1.102299387 | 0.0002995  | 0.01489206 | 0.0002995  | 0.01335371 | 0.00010362 | 0.00682223 | 0.0000106  | 0.001483462 | 1 | 3.68613E-05 | 0.00599924 |
| ILMN_1257463 | BCL11A        | 1.102238843 | 0.00094262 | 0.02607154 | 0.00094262 | 0.02430167 | 0.00064732 | 0.02378135 | 0.00029644 | 0.014423405 | 1 | 0.001531347 | 0.05016159 |
| ILMN_2634157 | ZFP654        | 1.102206279 | 0.0002995  | 0.01489206 | 0.0002995  | 0.01335371 | 0.00000507 | 0.00076441 | 0.0000188  | 0.002298746 | 1 | 3.12891E-05 | 0.00543437 |

|                                                |                  |              |            |            |            |            |            |            |            |             |   |             |            |
|------------------------------------------------|------------------|--------------|------------|------------|------------|------------|------------|------------|------------|-------------|---|-------------|------------|
| ILMN_1238869                                   | LOC278666        | 1.102138175  | 0.00467484 | 0.07150478 | 0.00276802 | 0.04845153 | 0.0006377  | 0.02359297 | 0.00121677 | 0.035196389 | 0 | 0.00305523  | 0.07341857 |
| ILMN_1215910                                   | FOXN2            | 1.102070233  | 0.0002995  | 0.01489206 | 0.0002995  | 0.01335371 | 0.00074588 | 0.02612373 | 0.00053798 | 0.021230722 | 1 | 0.000438006 | 0.02507734 |
| ILMN_2621086                                   | FLI1             | 1.102009965  | 0.00122569 | 0.03054155 | 0.00149689 | 0.03284241 | 0.00147107 | 0.03946627 | 0.00070355 | 0.025381142 | 1 | 0.000873828 | 0.03714525 |
| ILMN_2699531                                   | RGS10            | 1.101989172  | 0.00227139 | 0.04545806 | 0.00149689 | 0.03284241 | 0.00051989 | 0.02080755 | 0.00041221 | 0.017749337 | 1 | 0.001068077 | 0.04167292 |
| ILMN_2603187                                   | MECP2            | 1.101917508  | 0.0002995  | 0.01489206 | 0.0002995  | 0.01335371 | 0.00000123 | 0.00026043 | 0.00000145 | 0.000347545 | 1 | 5.39498E-06 | 0.00202516 |
| ILMN_2982781                                   | KCNK5            | 1.101765886  | 0.0006399  | 0.0211535  | 0.0006399  | 0.01941092 | 0.0000223  | 0.00222523 | 0.0000282  | 0.002959627 | 1 | 0.000151664 | 0.01324485 |
| ILMN_1244845                                   | NARF             | 1.101738476  | 0.00094262 | 0.02607154 | 0.00094262 | 0.02430167 | 0.0000508  | 0.00397491 | 0.00015962 | 0.00973796  | 1 | 0.000453754 | 0.02560106 |
| ILMN_2680398                                   | ZC3H12D          | 1.10146721   | 0.0002995  | 0.01489206 | 0.0002995  | 0.01335371 | 0.000001   | 0.00021909 | 9.52E-07   | 0.000257701 | 1 | 7.03927E-06 | 0.00230764 |
| ILMN_2605031                                   | E330018D03RIK    | 1.101463118  | 0.0056004  | 0.08017457 | 0.00831809 | 0.09800443 | 0.00453712 | 0.07707642 | 0.01264569 | 0.136133148 | 0 | 0.010802479 | 0.14220108 |
| ILMN_2617477                                   | 8030476J24       | 1.101261776  | 0.00122569 | 0.03054155 | 0.00122569 | 0.02881591 | 0.00015789 | 0.00910673 | 0.00017366 | 0.010310561 | 1 | 0.00010758  | 0.01083883 |
| ILMN_2901284                                   | ADD3             | 1.101189602  | 0.0002995  | 0.01489206 | 0.0002995  | 0.01335371 | 0.0000471  | 0.00380085 | 0.0000359  | 0.003445285 | 1 | 4.70154E-05 | 0.00688184 |
| ILMN_2506499                                   | UBE3A            | 1.101180473  | 0.00252097 | 0.04839275 | 0.00252097 | 0.04602629 | 0.00053169 | 0.02111665 | 0.00192593 | 0.046019516 | 1 | 0.004924874 | 0.09535694 |
| ILMN_2605960                                   | RAB19            | 1.101133403  | 0.0020184  | 0.04200694 | 0.00149689 | 0.03284241 | 0.00042802 | 0.01837561 | 0.00058953 | 0.022608846 | 1 | 0.001141234 | 0.04287409 |
| ILMN_2562725                                   | C730013O11RIK    | 1.101075632  | 0.00094262 | 0.02607154 | 0.00094262 | 0.02430167 | 0.00087707 | 0.02868922 | 0.00102151 | 0.031783537 | 1 | 0.000504223 | 0.02732257 |
| ILMN_2567626                                   | PUM1             | 1.101065176  | 0.00628646 | 0.08573635 | 0.0056004  | 0.0767776  | 0.00642098 | 0.09434264 | 0.0045757  | 0.077674245 | 0 | 0.012677869 | 0.1539569  |
| ILMN_2954868                                   | OASL2            | 1.101052773  | 0.00227139 | 0.04545806 | 0.00301234 | 0.05155233 | 0.00495144 | 0.08123106 | 0.00212755 | 0.048753581 | 0 | 0.0010331   | 0.04099743 |
| ILMN_1233894                                   | DTNB             | 1.100978861  | 0.0002995  | 0.01489206 | 0.0002995  | 0.01335371 | 0.00039474 | 0.01735374 | 0.00100272 | 0.0313667   | 1 | 0.00057968  | 0.02968357 |
| ILMN_1229245                                   | INPP4B           | 1.100970899  | 0.00227139 | 0.04545806 | 0.00176049 | 0.03635757 | 0.0004464  | 0.01884113 | 0.00062485 | 0.023550381 | 1 | 0.000873828 | 0.03714525 |
| ILMN_1256639                                   | CD247            | 1.100911079  | 0.0006399  | 0.0211535  | 0.0002995  | 0.01335371 | 0.0000315  | 0.0028568  | 0.0000379  | 0.003587283 | 1 | 0.000353739 | 0.02219068 |
| ILMN_2631192                                   | VPS26B           | 1.100779486  | 0.00467484 | 0.07150478 | 0.00227139 | 0.0429166  | 0.00243729 | 0.05437251 | 0.00115122 | 0.03404972  | 0 | 0.006029251 | 0.10646569 |
| ILMN_2038768                                   | control_ILMN_203 | 1.1007468    | 0.10926429 | 0.40116694 | 0.10721317 | 0.39734945 | 0.11759807 | 0.4332967  | 0.11009287 | 0.413665062 | 0 | 0.246250128 | 0.60756362 |
| ILMN_2668977                                   | 1500032D16RIK    | 1.100684878  | 0.0002995  | 0.01489206 | 0.0002995  | 0.01335371 | 0.00000386 | 0.00063236 | 0.00000566 | 0.00097714  | 1 | 1.1877E-05  | 0.00314139 |
| ILMN_1248211                                   | SIDT1            | 1.100585537  | 0.00301234 | 0.05440113 | 0.0020184  | 0.03953445 | 0.00115892 | 0.03427199 | 0.00160715 | 0.041193921 | 0 | 0.002873882 | 0.07130914 |
| ILMN_2534151                                   | IRGB10           | 1.100553681  | 0.00537037 | 0.07818332 | 0.00628646 | 0.0826602  | 0.03005319 | 0.22151796 | 0.00905543 | 0.112610992 | 0 | 0.007994557 | 0.1216087  |
| ILMN_1224211                                   | EPB4.1L2         | 1.100521767  | 0.0051392  | 0.07619761 | 0.00696781 | 0.08825299 | 0.00796439 | 0.10708222 | 0.01547157 | 0.152284836 | 0 | 0.023367993 | 0.21022612 |
| ILMN_2771182                                   | H2-Q8            | 1.100477595  | 0.00252097 | 0.04839275 | 0.00176049 | 0.03635757 | 0.00048225 | 0.01977742 | 0.00025467 | 0.01309856  | 1 | 0.003246828 | 0.07602117 |
| ILMN_2890357                                   | 2610027C15RIK    | 1.10037148   | 0.0006399  | 0.0211535  | 0.0006399  | 0.01941092 | 0.00044866 | 0.01889928 | 0.00040132 | 0.017418469 | 1 | 0.000559888 | 0.02915112 |
| ILMN_2705732                                   | INADL            | 1.100280563  | 0.00094262 | 0.02607154 | 0.00122569 | 0.02881591 | 0.00026059 | 0.01305657 | 0.00022306 | 0.012129499 | 1 | 0.000559888 | 0.02915112 |
| ILMN_2422023                                   | C330006D17RIK    | 1.10024538   | 0.00397039 | 0.064249   | 0.0051392  | 0.07282894 | 0.00529378 | 0.08485181 | 0.00649293 | 0.093577166 | 0 | 0.007351981 | 0.11667667 |
| ILMN_1239398                                   | LOC100046817     | 1.100205887  | 0.02094553 | 0.16993323 | 0.02372203 | 0.17961616 | 0.01005217 | 0.12237853 | 0.02557207 | 0.198492675 | 0 | 0.044021446 | 0.28499962 |
| ILMN_1256245                                   | RLF              | 1.100181996  | 0.00537037 | 0.07818332 | 0.00786961 | 0.09521779 | 0.00363532 | 0.06760424 | 0.00863224 | 0.109699863 | 0 | 0.005373592 | 0.10008988 |
| ILMN_1243846                                   | NRF1             | 1.100170193  | 0.00122569 | 0.03054155 | 0.00149689 | 0.03284241 | 0.00073562 | 0.02597776 | 0.00238171 | 0.052317743 | 0 | 0.001633268 | 0.05224999 |
| ILMN_1242769                                   | AKAP8L           | 1.100071536  | 0.00349473 | 0.05908105 | 0.00349473 | 0.0566205  | 0.00184551 | 0.04588832 | 0.0029622  | 0.060255548 | 0 | 0.002387591 | 0.06387081 |
| ILMN_2993109                                   | DDIT4            | 1.100038813  | 0.0002995  | 0.01489206 | 0.0002995  | 0.01335371 | 0.00000961 | 0.00121195 | 0.000042   | 0.003865058 | 1 | 0.000146035 | 0.01292295 |
| ILMN_1245987                                   | HNRNPK           | 1.100037736  | 0.01965954 | 0.16292455 | 0.0283949  | 0.19737141 | 0.02738494 | 0.21092553 | 0.04211374 | 0.257862175 | 0 | 0.051397104 | 0.30742496 |
| ~~~~~                                          |                  |              |            |            |            |            |            |            |            |             |   |             |            |
| Probes with  Fold Change  < 1.10 not displayed |                  |              |            |            |            |            |            |            |            |             |   |             |            |
| ~~~~~                                          |                  |              |            |            |            |            |            |            |            |             |   |             |            |
| ILMN_2715198                                   | GOLGA2           | -1.100056844 | 0.00719408 | 0.09294718 | 0.0076447  | 0.09407685 | 0.01094039 | 0.12840196 | 0.00946169 | 0.115200974 | 0 | 0.008929411 | 0.12924045 |
| ILMN_2711045                                   | SIRT5            | -1.100175511 | 0.0006399  | 0.0211535  | 0.00094262 | 0.02430167 | 0.00048467 | 0.01985889 | 0.00026924 | 0.013583836 | 1 | 0.000264806 | 0.01861919 |
| ILMN_2734856                                   | A930009M04RIK    | -1.10024481  | 0.0002995  | 0.01489206 | 0.0002995  | 0.01335371 | 0.00000347 | 0.00058692 | 0.00000793 | 0.001243596 | 1 | 1.97985E-05 | 0.00420804 |
| ILMN_1253854                                   | TGIF1            | -1.100335725 | 0.01098073 | 0.11810945 | 0.00898742 | 0.10212898 | 0.00427564 | 0.07428823 | 0.00643797 | 0.093170157 | 0 | 0.017311316 | 0.18018556 |
| ILMN_2769945                                   | BCO14795         | -1.10036431  | 0.00094262 | 0.02607154 | 0.00094262 | 0.02430167 | 0.0000879  | 0.00605816 | 0.00020323 | 0.011438788 | 1 | 0.000522178 | 0.02800209 |
| ILMN_2954195                                   | SCYL1            | -1.100565484 | 0.00809366 | 0.10014632 | 0.00651414 | 0.08446632 | 0.00354956 | 0.06694553 | 0.00616438 | 0.090932677 | 0 | 0.009177877 | 0.1304834  |
| ILMN_2988572                                   | EZH2             | -1.100604827 | 0.00628646 | 0.08573635 | 0.00605844 | 0.08075955 | 0.00163133 | 0.0423263  | 0.00517364 | 0.083183907 | 0 | 0.011706901 | 0.14779526 |

|              |               |              |            |            |            |            |            |            |            |             |   |             |            |
|--------------|---------------|--------------|------------|------------|------------|------------|------------|------------|------------|-------------|---|-------------|------------|
| ILMN_2728118 | RRP12         | -1.100673522 | 0.0002995  | 0.01489206 | 0.0002995  | 0.01335371 | 0.0000058  | 0.00084519 | 0.00000976 | 0.001398167 | 1 | 2.34093E-05 | 0.00450296 |
| ILMN_1235470 | HNRNPC        | -1.100796556 | 0.0002995  | 0.01489206 | 0.0002995  | 0.01335371 | 2.8E-08    | 0.0000148  | 1.42E-07   | 0.0000709   | 1 | 4.50906E-06 | 0.00180983 |
| ILMN_2774410 | STFA1         | -1.100797564 | 0.0336756  | 0.21913659 | 0.03956153 | 0.23673264 | 0.03507069 | 0.2404769  | 0.03975572 | 0.250087018 | 0 | 0.058515334 | 0.32634954 |
| ILMN_2856095 | ZC3H12A       | -1.101004577 | 0.00149689 | 0.03478153 | 0.00094262 | 0.02430167 | 0.00016088 | 0.00919959 | 0.00033043 | 0.015473218 | 1 | 0.001259689 | 0.04555924 |
| ILMN_2985447 | CMTM7         | -1.101081672 | 0.00094262 | 0.02607154 | 0.00094262 | 0.02430167 | 0.00036007 | 0.01627185 | 0.00030875 | 0.014785413 | 1 | 0.000438006 | 0.02507734 |
| ILMN_2870487 | CPNE2         | -1.101235208 | 0.00301234 | 0.05440113 | 0.00176049 | 0.03635757 | 0.00015688 | 0.0090601  | 0.00033839 | 0.015735209 | 0 | 0.002173782 | 0.0607706  |
| ILMN_2736762 | IFRD2         | -1.101280587 | 0.00943231 | 0.10825947 | 0.00898742 | 0.10212898 | 0.00427352 | 0.07427913 | 0.00677904 | 0.095608851 | 0 | 0.021171123 | 0.19968637 |
| ILMN_2620061 | TBCB          | -1.101312875 | 0.0002995  | 0.01489206 | 0.0002995  | 0.01335371 | 0.0000296  | 0.00274031 | 0.0000316  | 0.003180587 | 1 | 9.5799E-05  | 0.01018072 |
| ILMN_1252016 | ABHD2         | -1.101327755 | 0.00176049 | 0.0385938  | 0.0006399  | 0.01941092 | 0.0000452  | 0.003705   | 0.00013411 | 0.00874694  | 1 | 0.000453754 | 0.02560106 |
| ILMN_2683802 | NUDT9         | -1.101534614 | 0.0002995  | 0.01489206 | 0.0002995  | 0.01335371 | 0.00000633 | 0.00091523 | 0.0000127  | 0.001692242 | 1 | 7.57938E-05 | 0.00879794 |
| ILMN_2758087 | CCNT1         | -1.101561438 | 0.00349473 | 0.05908105 | 0.0032539  | 0.05432415 | 0.00117117 | 0.034443   | 0.00137359 | 0.03783222  | 0 | 0.003663228 | 0.08166297 |
| ILMN_1222246 | ADFP          | -1.101682242 | 0.00943231 | 0.10825947 | 0.00854165 | 0.09937884 | 0.00289096 | 0.0601428  | 0.00520412 | 0.083438223 | 0 | 0.013017012 | 0.15603988 |
| ILMN_1250149 | DNMT3L        | -1.101692032 | 0.00094262 | 0.02607154 | 0.0002995  | 0.01335371 | 0.0000385  | 0.00328743 | 0.000081   | 0.006004936 | 1 | 0.000135361 | 0.01242731 |
| ILMN_2855423 | UBE3B         | -1.101823534 | 0.00467484 | 0.07150478 | 0.00444101 | 0.06659434 | 0.00097578 | 0.0310015  | 0.00261887 | 0.055581773 | 0 | 0.011096803 | 0.14428014 |
| ILMN_3093150 | NPM3          | -1.101881244 | 0.01076004 | 0.11696153 | 0.01207886 | 0.12146481 | 0.00748853 | 0.10343287 | 0.01078041 | 0.12447925  | 0 | 0.018679697 | 0.18694557 |
| ILMN_2887208 | RAB1B         | -1.1018898   | 0.00741953 | 0.09487807 | 0.00467484 | 0.06877491 | 0.00211426 | 0.04998366 | 0.00162135 | 0.041443788 | 0 | 0.005220076 | 0.09861156 |
| ILMN_1246622 | 9130204C11RIK | -1.102206651 | 0.00094262 | 0.02607154 | 0.0006399  | 0.01941092 | 0.0000832  | 0.0058247  | 0.0000636  | 0.005055758 | 1 | 0.000246108 | 0.01770572 |
| ILMN_1237507 | DLST          | -1.102242835 | 0.0002995  | 0.01489206 | 0.0002995  | 0.01335371 | 0.0000239  | 0.0023395  | 0.0000261  | 0.002837023 | 1 | 4.70154E-05 | 0.00688184 |
| ILMN_2615739 | GM459         | -1.102378757 | 0.01750895 | 0.15321051 | 0.0211598  | 0.1686674  | 0.01902429 | 0.17493554 | 0.02815215 | 0.207735874 | 0 | 0.018679697 | 0.18694557 |
| ILMN_2605767 | REPIN1        | -1.102407679 | 0.0002995  | 0.01489206 | 0.0002995  | 0.01335371 | 0.00047865 | 0.01968165 | 0.0000565  | 0.004637506 | 1 | 0.000120719 | 0.01149104 |
| ILMN_2675033 | SLC9A7        | -1.102560823 | 0.0002995  | 0.01489206 | 0.0002995  | 0.01335371 | 0.0000189  | 0.00194817 | 0.0000376  | 0.003576126 | 1 | 9.5799E-05  | 0.01018072 |
| ILMN_2531520 | GM962         | -1.10277933  | 0.0006399  | 0.0211535  | 0.0006399  | 0.01941092 | 0.0000441  | 0.00363684 | 0.0000899  | 0.006457872 | 1 | 0.000393771 | 0.02371136 |
| ILMN_2952587 | INTS5         | -1.102916647 | 0.01469649 | 0.13944707 | 0.01273594 | 0.12533842 | 0.00646817 | 0.09479661 | 0.00750925 | 0.101343301 | 0 | 0.008450429 | 0.12538799 |
| ILMN_3162081 | WDR6          | -1.103000504 | 0.00149689 | 0.03478153 | 0.0020184  | 0.03953445 | 0.00047402 | 0.01954308 | 0.00088629 | 0.029245777 | 1 | 0.000934606 | 0.03863507 |
| ILMN_2823778 | SC4MOL        | -1.103118657 | 0.00094262 | 0.02607154 | 0.0002995  | 0.01335371 | 0.00060963 | 0.02290284 | 0.00035368 | 0.016129651 | 1 | 0.000176289 | 0.01444673 |
| ILMN_2637804 | 4933407P14RIK | -1.103123645 | 0.02775949 | 0.19711952 | 0.02881875 | 0.19934791 | 0.03335811 | 0.23451441 | 0.02708149 | 0.204795156 | 0 | 0.03192796  | 0.24475474 |
| ILMN_2944939 | CAMK1         | -1.103291951 | 0.0002995  | 0.01489206 | 0.0002995  | 0.01335371 | 0.0000298  | 0.00274909 | 0.0000185  | 0.002263791 | 1 | 3.12891E-05 | 0.00543437 |
| ILMN_2966386 | RCL1          | -1.10330649  | 0.0006399  | 0.0211535  | 0.0006399  | 0.01941092 | 0.00000151 | 0.00030356 | 0.00000531 | 0.000929895 | 1 | 8.86216E-05 | 0.00982291 |
| ILMN_2721208 | MSTO1         | -1.103313852 | 0.0076447  | 0.09672601 | 0.0051392  | 0.07282894 | 0.00087596 | 0.02868922 | 0.00154119 | 0.04014427  | 0 | 0.005531174 | 0.10148188 |
| ILMN_1243107 | CENTD3        | -1.103383796 | 0.0006399  | 0.0211535  | 0.0006399  | 0.01941092 | 0.0000139  | 0.00158406 | 0.0000239  | 0.002688276 | 1 | 0.000204639 | 0.01592867 |
| ILMN_2491232 | USP36         | -1.103389463 | 0.0020184  | 0.04200694 | 0.00149689 | 0.03284241 | 0.00016003 | 0.00916202 | 0.00017844 | 0.010486465 | 1 | 0.003055109 | 0.07341857 |
| ILMN_1259100 | PILRB1        | -1.103436708 | 0.00490758 | 0.07399298 | 0.00301234 | 0.05155233 | 0.00088463 | 0.0288961  | 0.0019523  | 0.046411523 | 0 | 0.002173782 | 0.0607706  |
| ILMN_1225747 | ZNFN1A3       | -1.103489414 | 0.0002995  | 0.01489206 | 0.0002995  | 0.01335371 | 0.0000072  | 0.00099242 | 0.0000278  | 0.002931426 | 1 | 0.000453754 | 0.02560106 |
| ILMN_2721149 | ARL11         | -1.103567882 | 0.0032539  | 0.05678214 | 0.00349473 | 0.05666205 | 0.00078155 | 0.02696727 | 0.00091667 | 0.029754618 | 0 | 0.002620495 | 0.06768933 |
| ILMN_1244424 | ADORA2B       | -1.103675196 | 0.00420612 | 0.06669083 | 0.00252097 | 0.04602629 | 0.00070446 | 0.02533145 | 0.00066071 | 0.024405921 | 0 | 0.00388914  | 0.08408165 |
| ILMN_1228832 | NGP           | -1.103786521 | 0.01295435 | 0.12973001 | 0.01076004 | 0.11338366 | 0.00414593 | 0.07330247 | 0.00400122 | 0.071825953 | 0 | 0.011398229 | 0.14607747 |
| ILMN_1260456 | HSD3B7        | -1.103805679 | 0.0002995  | 0.01489206 | 0.0002995  | 0.01335371 | 8.64E-07   | 0.00019904 | 0.00000221 | 0.000472255 | 1 | 2.15311E-05 | 0.0043202  |
| ILMN_1227235 | TIMM10        | -1.103984846 | 0.00122569 | 0.03054155 | 0.00122569 | 0.02881591 | 0.0003537  | 0.01612517 | 0.0005671  | 0.0219992   | 1 | 0.000763113 | 0.03482416 |
| ILMN_2871749 | EAR6          | -1.10402136  | 0.0032539  | 0.05678214 | 0.00490758 | 0.07073729 | 0.00962513 | 0.11918617 | 0.00641492 | 0.093049294 | 0 | 0.005220076 | 0.09861156 |
| ILMN_2911344 | PLSCR1        | -1.104115255 | 0.0002995  | 0.01489206 | 0.0002995  | 0.01335371 | 0.00055175 | 0.02156346 | 0.00011527 | 0.007776142 | 1 | 0.000329201 | 0.02128238 |
| ILMN_2698494 | NFU1          | -1.104319371 | 0.00122569 | 0.03054155 | 0.00122569 | 0.02881591 | 0.00101187 | 0.03167407 | 0.00130944 | 0.036673066 | 1 | 0.001301631 | 0.04617913 |
| ILMN_2603898 | CLEC4B1       | -1.104355951 | 0.00149689 | 0.03478153 | 0.0006399  | 0.01941092 | 0.00047724 | 0.01964113 | 0.00013919 | 0.008973291 | 1 | 0.00042277  | 0.02466001 |
| ILMN_2749448 | PLEKHO2       | -1.104536512 | 0.00149689 | 0.03478153 | 0.00149689 | 0.03284241 | 0.0000583  | 0.00441806 | 0.00017802 | 0.010475755 | 1 | 0.000600091 | 0.03046224 |
| ILMN_2631014 | PIAS3         | -1.104655312 | 0.0002995  | 0.01489206 | 0.0002995  | 0.01335371 | 0.00000858 | 0.00113395 | 0.0000309  | 0.003134864 | 1 | 3.39668E-05 | 0.00570777 |
| ILMN_2595863 | CHST10        | -1.10468852  | 0.0002995  | 0.01489206 | 0.0002995  | 0.01335371 | 0.00011639 | 0.00743132 | 0.00030356 | 0.01463008  | 1 | 0.00022037  | 0.01646479 |
| ILMN_1231439 | AATK          | -1.104893386 | 0.00227139 | 0.04545806 | 0.00149689 | 0.03284241 | 0.0000541  | 0.00416529 | 0.00025931 | 0.013278569 | 1 | 0.003449313 | 0.07881943 |
| ILMN_2923607 | PHLDA3        | -1.105141716 | 0.0006399  | 0.0211535  | 0.0002995  | 0.01335371 | 0.0000359  | 0.00314503 | 0.0000324  | 0.003223303 | 1 | 5.09531E-05 | 0.00725295 |

|              |               |              |            |            |            |            |            |            |            |             |   |             |            |
|--------------|---------------|--------------|------------|------------|------------|------------|------------|------------|------------|-------------|---|-------------|------------|
| ILMN_2544343 | STAB1         | -1.105676499 | 0.0002995  | 0.01489206 | 0.0002995  | 0.01335371 | 0.00000574 | 0.00084519 | 0.0000233  | 0.002627969 | 1 | 0.000176289 | 0.01444673 |
| ILMN_1238102 | IDE           | -1.105690099 | 0.04959771 | 0.27047142 | 0.05750633 | 0.289534   | 0.03780343 | 0.24938156 | 0.06636787 | 0.321827801 | 0 | 0.059776798 | 0.32882056 |
| ILMN_2834198 | SCN1B         | -1.106256844 | 0.0002995  | 0.01489206 | 0.0006399  | 0.01941092 | 0.00023767 | 0.01217572 | 0.00044649 | 0.018790822 | 1 | 0.000453754 | 0.02560106 |
| ILMN_1236702 | LILRB4        | -1.10637923  | 0.01076004 | 0.11696153 | 0.00898742 | 0.10212898 | 0.00224068 | 0.05176032 | 0.00387533 | 0.070435395 | 0 | 0.017311316 | 0.18018556 |
| ILMN_2979639 | H2-DMB2       | -1.106407472 | 0.00227139 | 0.04545806 | 0.0020184  | 0.03953445 | 0.00172654 | 0.04391533 | 0.00099673 | 0.031258932 | 1 | 0.00270263  | 0.06885567 |
| ILMN_1256817 | SLPI          | -1.106517473 | 0.04395927 | 0.25213143 | 0.03008794 | 0.20371558 | 0.01322187 | 0.14325168 | 0.01654123 | 0.157798872 | 0 | 0.038432634 | 0.26812964 |
| ILMN_2590350 | UBE2F         | -1.106602174 | 0.00094262 | 0.02607154 | 0.00094262 | 0.02430167 | 0.00030653 | 0.0145343  | 0.000065   | 0.005110515 | 1 | 0.000157497 | 0.01350097 |
| ILMN_1240318 | SLC7A7        | -1.106705276 | 0.0002995  | 0.01489206 | 0.0002995  | 0.01335371 | 0.00037337 | 0.01669711 | 0.0005249  | 0.020878705 | 1 | 0.000470028 | 0.02607676 |
| ILMN_1215893 | ALG3          | -1.106724214 | 0.0002995  | 0.01489206 | 0.0002995  | 0.01335371 | 0.00000791 | 0.00106049 | 0.00000859 | 0.001299233 | 1 | 0.000212368 | 0.01604723 |
| ILMN_2780915 | PRMT7         | -1.106850835 | 0.00149689 | 0.03478153 | 0.00122569 | 0.02881591 | 0.00043663 | 0.01861404 | 0.0006752  | 0.024769672 | 1 | 0.002387492 | 0.06387081 |
| ILMN_2746830 | BCO22224      | -1.106855817 | 0.00397039 | 0.064249   | 0.0020184  | 0.03953445 | 0.00012205 | 0.00760514 | 0.000874   | 0.02899696  | 0 | 0.005858907 | 0.10440833 |
| ILMN_3120014 | SRI           | -1.106861448 | 0.00876432 | 0.1043511  | 0.01053919 | 0.11232356 | 0.01267052 | 0.13982328 | 0.01322195 | 0.139651023 | 0 | 0.029744406 | 0.23776625 |
| ILMN_2959292 | UPP1          | -1.107047972 | 0.0067415  | 0.08943186 | 0.00831809 | 0.09800443 | 0.00616669 | 0.09223153 | 0.00737179 | 0.100219589 | 0 | 0.008450429 | 0.12538799 |
| ILMN_2633457 | 1110057K04RIK | -1.107066336 | 0.0006399  | 0.0211535  | 0.0006399  | 0.01941092 | 0.0002621  | 0.01311825 | 0.00018047 | 0.010552902 | 1 | 0.000688785 | 0.03268184 |
| ILMN_2646209 | CDK10         | -1.107106695 | 0.01164003 | 0.12184595 | 0.00965407 | 0.10652405 | 0.00837294 | 0.10993164 | 0.00597071 | 0.089478328 | 0 | 0.004644853 | 0.0931111  |
| ILMN_2680440 | ATP6V1B2      | -1.107126066 | 0.00122569 | 0.03054155 | 0.00094262 | 0.02430167 | 0.0000173  | 0.00183184 | 0.00015479 | 0.009492492 | 1 | 0.00057965  | 0.02968357 |
| ILMN_2691706 | SAC3D1        | -1.107157088 | 0.00227139 | 0.04545806 | 0.0020184  | 0.03953445 | 0.00059451 | 0.02265805 | 0.00187868 | 0.045262385 | 1 | 0.001531347 | 0.05016159 |
| ILMN_1241909 | ATL3          | -1.107229662 | 0.00176049 | 0.0385938  | 0.0002995  | 0.01335371 | 0.0001247  | 0.00774952 | 0.0002357  | 0.012495554 | 1 | 0.001301631 | 0.04617913 |
| ILMN_2686975 | FAM129B       | -1.107251043 | 0.00094262 | 0.02607154 | 0.0006399  | 0.01941092 | 0.00010016 | 0.00665043 | 0.0000642  | 0.005083088 | 1 | 0.000621233 | 0.03109305 |
| ILMN_2900557 | KIF15         | -1.107418991 | 0.0056004  | 0.08017457 | 0.00252097 | 0.04602629 | 0.00050815 | 0.02053213 | 0.00073746 | 0.02616347  | 0 | 0.002314175 | 0.06295874 |
| ILMN_2745954 | 1110007L15RIK | -1.107513874 | 0.0006399  | 0.0211535  | 0.0002995  | 0.01335371 | 0.00025743 | 0.01295401 | 0.00026747 | 0.013561762 | 1 | 0.000284828 | 0.01943975 |
| ILMN_1226372 | RFFL          | -1.107562515 | 0.00094262 | 0.02607154 | 0.0006399  | 0.01941092 | 0.0000159  | 0.00174469 | 0.000055   | 0.004568149 | 1 | 0.000379979 | 0.02324165 |
| ILMN_3084818 | NR2C2AP       | -1.107652217 | 0.00227139 | 0.04545806 | 0.00122569 | 0.02881591 | 0.00042107 | 0.01819815 | 0.00097889 | 0.030933174 | 1 | 0.001797898 | 0.05487657 |
| ILMN_1248733 | PA2G4         | -1.107667438 | 0.00176049 | 0.0385938  | 0.00252097 | 0.04602629 | 0.00225915 | 0.05195492 | 0.0039532  | 0.071295686 | 0 | 0.002787111 | 0.07008733 |
| ILMN_2630605 | FSCN1         | -1.107768152 | 0.00809366 | 0.10014632 | 0.00605844 | 0.08075955 | 0.0018293  | 0.04560708 | 0.00255619 | 0.054799056 | 0 | 0.007351981 | 0.11667667 |
| ILMN_3003631 | PPAP2C        | -1.10780952  | 0.00276802 | 0.05133777 | 0.00276802 | 0.04845153 | 0.00099443 | 0.03132914 | 0.00125441 | 0.035750241 | 0 | 0.000934606 | 0.03863507 |
| ILMN_2598775 | STARD3NL      | -1.107943892 | 0.00176049 | 0.0385938  | 0.00149689 | 0.03284241 | 0.0000601  | 0.00452448 | 0.00015332 | 0.009469751 | 1 | 0.000737547 | 0.0342621  |
| ILMN_2588995 | RAB8B         | -1.108140051 | 0.00467484 | 0.07150478 | 0.0020184  | 0.03953445 | 0.00061097 | 0.02292456 | 0.00068182 | 0.024911182 | 0 | 0.00099904  | 0.0402366  |
| ILMN_2936468 | 5730596K20RIK | -1.108252625 | 0.0002995  | 0.01489206 | 0.0002995  | 0.01335371 | 8.48E-07   | 0.00019639 | 0.00000286 | 0.000576709 | 1 | 3.26018E-05 | 0.00557911 |
| ILMN_2699522 | DYRK3         | -1.108291839 | 0.0002995  | 0.01489206 | 0.0002995  | 0.01335371 | 0.0000346  | 0.00306253 | 0.0000326  | 0.003233591 | 1 | 2.65234E-05 | 0.00480383 |
| ILMN_2611431 | PPP3CA        | -1.108544093 | 0.01901516 | 0.15981086 | 0.02308219 | 0.177055   | 0.0308581  | 0.22442614 | 0.03082622 | 0.218815938 | 0 | 0.043046488 | 0.28193118 |
| ILMN_2908056 | TMBIM1        | -1.108696543 | 0.0002995  | 0.01489206 | 0.0002995  | 0.01335371 | 0.00035559 | 0.01617837 | 0.00070271 | 0.025381142 | 1 | 0.000844832 | 0.03651291 |
| ILMN_2744909 | GMPPB         | -1.108708169 | 0.0006399  | 0.0211535  | 0.0006399  | 0.01941092 | 0.00218189 | 0.05098423 | 0.00160119 | 0.041131766 | 0 | 0.001218998 | 0.0445025  |
| ILMN_2925281 | ABCD3         | -1.108715146 | 0.0002995  | 0.01489206 | 0.0002995  | 0.01335371 | 1.43E-07   | 0.0000497  | 1.83E-07   | 0.0000833   | 1 | 1.89069E-06 | 0.00111411 |
| ILMN_2988931 | STFA1         | -1.108889714 | 0.01426212 | 0.13687557 | 0.01621381 | 0.14443088 | 0.0128175  | 0.14064502 | 0.01425719 | 0.145852642 | 0 | 0.022800994 | 0.20757243 |
| ILMN_2819679 | TMEM50A       | -1.108893575 | 0.01664564 | 0.14895372 | 0.01858605 | 0.1562833  | 0.01881688 | 0.17402897 | 0.01897851 | 0.169539906 | 0 | 0.032684998 | 0.24738569 |
| ILMN_2698430 | BCL2L1        | -1.109012645 | 0.00094262 | 0.02607154 | 0.00094262 | 0.02430167 | 0.00084298 | 0.02806722 | 0.00013557 | 0.008801061 | 1 | 0.000621233 | 0.03109305 |
| ILMN_3137980 | ZFP41         | -1.109014707 | 0.0002995  | 0.01489206 | 0.0002995  | 0.01335371 | 0.0000051  | 0.00076551 | 0.00000777 | 0.001225434 | 1 | 3.25994E-05 | 0.00557911 |
| ILMN_2914507 | NDUFB6        | -1.109148444 | 0.00628646 | 0.08573635 | 0.00628646 | 0.0826602  | 0.00323475 | 0.06374761 | 0.00475793 | 0.079602307 | 0 | 0.007994557 | 0.1216087  |
| ILMN_1243329 | DAB2          | -1.109426935 | 0.01186014 | 0.12340942 | 0.00809366 | 0.09652695 | 0.0024452  | 0.05450994 | 0.00311624 | 0.062120568 | 0 | 0.029045675 | 0.23488344 |
| ILMN_2640453 | WDR55         | -1.109433931 | 0.0006399  | 0.0211535  | 0.0006399  | 0.01941092 | 0.0000894  | 0.00612683 | 0.00012054 | 0.008038629 | 1 | 0.000237231 | 0.01736224 |
| ILMN_2867696 | CDC42BPB      | -1.110032665 | 0.0002995  | 0.01489206 | 0.0002995  | 0.01335371 | 0.0000456  | 0.00372478 | 0.0001107  | 0.007522402 | 1 | 0.000379979 | 0.02324165 |
| ILMN_2795412 | TMEM176A      | -1.110201644 | 0.0006399  | 0.0211535  | 0.0006399  | 0.01941092 | 0.0000316  | 0.00285855 | 0.0000256  | 0.002802168 | 1 | 8.86334E-05 | 0.00982291 |
| ILMN_2727273 | SWAP70        | -1.110366306 | 0.0002995  | 0.01489206 | 0.0002995  | 0.01335371 | 0.00000132 | 0.00027167 | 0.0000026  | 0.000530708 | 1 | 2.44059E-05 | 0.00463717 |
| ILMN_2620767 | ABHD2         | -1.110517436 | 0.0002995  | 0.01489206 | 0.0002995  | 0.01335371 | 0.00000256 | 0.00046493 | 0.00000565 | 0.00097714  | 1 | 4.33673E-05 | 0.0065968  |
| ILMN_1221920 | PLEKHG3       | -1.110664539 | 0.0002995  | 0.01489206 | 0.0002995  | 0.01335371 | 0.0000203  | 0.00208152 | 0.0000086  | 0.001299233 | 1 | 1.74444E-05 | 0.00390377 |
| ILMN_2764607 | 1810009N02RIK | -1.110668063 | 0.0002995  | 0.01489206 | 0.0002995  | 0.01335371 | 0.00000473 | 0.0007333  | 0.0000076  | 0.001211113 | 1 | 4.89467E-05 | 0.00705366 |

|              |                 |              |            |            |            |            |            |            |            |             |   |             |            |
|--------------|-----------------|--------------|------------|------------|------------|------------|------------|------------|------------|-------------|---|-------------|------------|
| ILMN_2842767 | NACC1           | -1.110682075 | 0.0006399  | 0.0211535  | 0.0006399  | 0.01941092 | 0.00023804 | 0.01217572 | 0.00022635 | 0.012236289 | 1 | 0.00042277  | 0.02466001 |
| ILMN_2755399 | PPP2R4          | -1.110682315 | 0.00276802 | 0.05133777 | 0.00227139 | 0.04291666 | 0.0021293  | 0.05017441 | 0.00148083 | 0.039320129 | 0 | 0.001531347 | 0.05016159 |
| ILMN_1256354 | GCLM            | -1.110765414 | 0.00149689 | 0.03478153 | 0.00094262 | 0.02430167 | 0.0000865  | 0.00599563 | 0.0000573  | 0.004664893 | 1 | 7.57938E-05 | 0.00879794 |
| ILMN_2981689 | NUP133          | -1.11080026  | 0.0002995  | 0.01489206 | 0.0002995  | 0.01335371 | 0.000013   | 0.00149316 | 0.0000117  | 0.000296995 | 1 | 7.35697E-06 | 0.00232956 |
| ILMN_2915303 | TREM3           | -1.110935528 | 0.00094262 | 0.02607154 | 0.00122569 | 0.02881591 | 0.0001306  | 0.00798826 | 0.00024248 | 0.012705581 | 1 | 0.000228655 | 0.01684049 |
| ILMN_1215209 | CLECSF9         | -1.110943822 | 0.0198742  | 0.16408427 | 0.02030331 | 0.16494841 | 0.01231585 | 0.13728535 | 0.01456125 | 0.147630924 | 0 | 0.016448649 | 0.17608907 |
| ILMN_2841290 | TNFAIP2         | -1.110987512 | 0.0002995  | 0.01489206 | 0.0006399  | 0.01941092 | 0.00030838 | 0.01458748 | 0.00018794 | 0.010853565 | 1 | 0.000212368 | 0.01604723 |
| ILMN_2959293 | UPP1            | -1.111007524 | 0.00149689 | 0.03478153 | 0.00149689 | 0.03284241 | 0.00100994 | 0.03163507 | 0.00135104 | 0.037410476 | 1 | 0.002314272 | 0.06295874 |
| ILMN_2614563 | APOL7C          | -1.111021044 | 0.0002995  | 0.01489206 | 0.0002995  | 0.01335371 | 0.0000444  | 0.00364378 | 0.00014172 | 0.009037925 | 1 | 0.000237231 | 0.01736224 |
| ILMN_3160203 | ZFP213          | -1.11102856  | 0.0006399  | 0.0211535  | 0.0006399  | 0.01941092 | 0.0000159  | 0.00174469 | 0.0000628  | 0.00500903  | 1 | 0.000306263 | 0.02048222 |
| ILMN_2601379 | MGC18837        | -1.111045685 | 0.0002995  | 0.01489206 | 0.0002995  | 0.01335371 | 0.0000105  | 0.00128151 | 0.0000199  | 0.002370654 | 1 | 4.51564E-05 | 0.00675851 |
| ILMN_1235000 | Y1F1A           | -1.111117156 | 0.0006399  | 0.0211535  | 0.0006399  | 0.01941092 | 0.0000128  | 0.00148603 | 0.00000478 | 0.000855756 | 1 | 3.83949E-05 | 0.00609954 |
| ILMN_2640995 | SPIRE2          | -1.111127251 | 0.0002995  | 0.01489206 | 0.0002995  | 0.01335371 | 1.43E-07   | 0.0000497  | 5.59E-07   | 0.000175929 | 1 | 5.39498E-06 | 0.00202516 |
| ILMN_2884098 | GORASP2         | -1.111288278 | 0.0002995  | 0.01489206 | 0.0002995  | 0.01335371 | 0.00000784 | 0.00105936 | 0.0000312  | 0.003152395 | 1 | 7.28705E-05 | 0.00865281 |
| ILMN_1256142 | MARCKS          | -1.111356803 | 0.00537037 | 0.07818332 | 0.00176049 | 0.03635757 | 0.0000741  | 0.00534833 | 0.00026102 | 0.01332625  | 0 | 0.000643034 | 0.03157309 |
| ILMN_2601147 | KDEL1           | -1.111368149 | 0.00176049 | 0.0385938  | 0.0020184  | 0.03953445 | 0.00053473 | 0.0212191  | 0.00078635 | 0.027233771 | 1 | 0.001581552 | 0.05126497 |
| ILMN_2680549 | PIK3CB          | -1.111474769 | 0.0002995  | 0.01489206 | 0.0002995  | 0.01335371 | 0.00025023 | 0.01267398 | 0.00045843 | 0.01916188  | 1 | 0.001686462 | 0.05325863 |
| ILMN_1218181 | IFITM6          | -1.111515015 | 0.00122569 | 0.03054155 | 0.00122569 | 0.02881591 | 0.00094292 | 0.03016485 | 0.00037738 | 0.0167608   | 1 | 0.000643034 | 0.03157309 |
| ILMN_2550095 | 6230425C21RIK   | -1.111625769 | 0.00149689 | 0.03478153 | 0.00176049 | 0.03635757 | 0.00081345 | 0.02755739 | 0.00195454 | 0.046417419 | 1 | 0.003149701 | 0.07483876 |
| ILMN_1224390 | 1700129I04RIK   | -1.111956114 | 0.0002995  | 0.01489206 | 0.0002995  | 0.01335371 | 0.00000447 | 0.00070872 | 0.0000272  | 0.002888688 | 1 | 0.000189968 | 0.01508948 |
| ILMN_1240746 | MCPT4           | -1.111968534 | 0.00444101 | 0.0691859  | 0.00176049 | 0.03635757 | 0.0001123  | 0.0072499  | 0.00028643 | 0.014095117 | 0 | 0.002173782 | 0.0607706  |
| ILMN_1230423 | SH3PXD2B        | -1.111999219 | 0.0002995  | 0.01489206 | 0.0002995  | 0.01335371 | 0.0000155  | 0.00171658 | 0.00000487 | 0.000862773 | 1 | 7.88278E-05 | 0.00901523 |
| ILMN_1247468 | FTSJ3           | -1.112004157 | 0.0002995  | 0.01489206 | 0.0002995  | 0.01335371 | 0.0000521  | 0.00404506 | 0.0000644  | 0.005086516 | 1 | 6.47271E-05 | 0.00803428 |
| ILMN_3140913 | TBC1D2          | -1.112150855 | 0.0002995  | 0.01489206 | 0.0002995  | 0.01335371 | 0.0000389  | 0.00330101 | 0.00000834 | 0.001279253 | 1 | 0.000111802 | 0.01097902 |
| ILMN_2519673 | VWF             | -1.112341924 | 0.0006399  | 0.0211535  | 0.0002995  | 0.01335371 | 0.0000321  | 0.00289074 | 0.0000414  | 0.003820132 | 1 | 9.21504E-05 | 0.00995203 |
| ILMN_2617468 | CHAC1           | -1.112462827 | 0.00122569 | 0.03054155 | 0.00094262 | 0.02430167 | 0.00100678 | 0.03156276 | 0.00039234 | 0.017180018 | 1 | 0.000665544 | 0.03206944 |
| ILMN_2450031 | SCL0004020.1_31 | -1.112588927 | 0.00094262 | 0.02607154 | 0.00094262 | 0.02430167 | 0.0000097  | 0.00121762 | 0.0000309  | 0.003134864 | 1 | 3.68613E-05 | 0.00599924 |
| ILMN_2450155 | IGLC2_J00595_IG | -1.112608245 | 0.0002995  | 0.01489206 | 0.0002995  | 0.01335371 | 0.00000122 | 0.00025882 | 0.0000337  | 0.003292439 | 1 | 0.000317448 | 0.02078825 |
| ILMN_1218104 | 5630401D24RIK   | -1.112744368 | 0.0002995  | 0.01489206 | 0.0002995  | 0.01335371 | 0.00000346 | 0.00058692 | 0.00000396 | 0.000746457 | 1 | 5.74504E-05 | 0.00761864 |
| ILMN_1237743 | LOC382813       | -1.112766578 | 0.0002995  | 0.01489206 | 0.0002995  | 0.01335371 | 6.54E-07   | 0.0001601  | 0.00000198 | 0.000436891 | 1 | 1.08955E-05 | 0.00300091 |
| ILMN_1222872 | WBSCR16         | -1.112770151 | 0.00373333 | 0.06184411 | 0.00397039 | 0.06196763 | 0.00137828 | 0.03773799 | 0.00362037 | 0.068005458 | 0 | 0.004924874 | 0.09535694 |
| ILMN_2687828 | ARID3A          | -1.112982962 | 0.00965407 | 0.11001819 | 0.00786961 | 0.09521779 | 0.00278855 | 0.05902629 | 0.00354237 | 0.067235737 | 0 | 0.011096803 | 0.14428014 |
| ILMN_2772492 | TSR1            | -1.11339113  | 0.0002995  | 0.01489206 | 0.0002995  | 0.01335371 | 0.0000835  | 0.00583655 | 0.0000958  | 0.0067548   | 1 | 0.000146035 | 0.01292295 |
| ILMN_2868480 | EAR4            | -1.11346403  | 0.06828805 | 0.3184975  | 0.07366518 | 0.32882749 | 0.05977412 | 0.31205079 | 0.07952314 | 0.35376248  | 0 | 0.035872649 | 0.25847743 |
| ILMN_1219168 | GPN1            | -1.113513745 | 0.0002995  | 0.01489206 | 0.0002995  | 0.01335371 | 0.00012201 | 0.00760514 | 0.00045913 | 0.01916188  | 1 | 0.000621233 | 0.03109305 |
| ILMN_1214608 | PLXND1          | -1.113701478 | 0.00094262 | 0.02607154 | 0.0006399  | 0.01941092 | 0.0000167  | 0.00178763 | 0.0000626  | 0.00500138  | 1 | 0.000816732 | 0.0360345  |
| ILMN_2723708 | FNBP1           | -1.113872343 | 0.0002995  | 0.01489206 | 0.0002995  | 0.01335371 | 0.00000754 | 0.00103182 | 0.0000151  | 0.001938491 | 1 | 5.09531E-05 | 0.00725295 |
| ILMN_2806180 | CSF3R           | -1.11399081  | 0.00176049 | 0.0385938  | 0.00149689 | 0.03284241 | 0.00012188 | 0.00760514 | 0.00034547 | 0.015942739 | 1 | 0.001977658 | 0.05767797 |
| ILMN_2652172 | NAGK            | -1.114167208 | 0.00094262 | 0.02607154 | 0.00094262 | 0.02430167 | 0.0000386  | 0.00328743 | 0.00010625 | 0.007284834 | 1 | 0.000212368 | 0.01604723 |
| ILMN_2859847 | PYGL            | -1.114288643 | 0.00149689 | 0.03478153 | 0.00149689 | 0.03284241 | 0.00010118 | 0.00668036 | 0.0003779  | 0.0167608   | 1 | 0.001482614 | 0.04961268 |
| ILMN_2470360 | BC037704        | -1.11448614  | 0.0002995  | 0.01489206 | 0.0002995  | 0.01335371 | 0.00000126 | 0.00026389 | 0.00000148 | 0.000354054 | 1 | 9.15833E-06 | 0.00268109 |
| ILMN_1217040 | 1300001I01RIK   | -1.114584244 | 0.00276802 | 0.05133777 | 0.00349473 | 0.0566205  | 0.00171808 | 0.04381888 | 0.00349757 | 0.066721909 | 0 | 0.005373592 | 0.10008988 |
| ILMN_1223285 | HSPA2           | -1.115046275 | 0.0002995  | 0.01489206 | 0.0002995  | 0.01335371 | 7.97E-07   | 0.00018585 | 0.00000345 | 0.000677604 | 1 | 4.70154E-05 | 0.00688184 |
| ILMN_2950814 | GM962           | -1.115047143 | 0.0067415  | 0.08943186 | 0.00537037 | 0.07497442 | 0.00081444 | 0.02757069 | 0.00231909 | 0.051476756 | 0 | 0.004783009 | 0.09409752 |
| ILMN_1214952 | CLN3            | -1.115097709 | 0.0002995  | 0.01489206 | 0.0002995  | 0.01335371 | 0.00000672 | 0.00095405 | 0.0000454  | 0.004033989 | 1 | 6.73408E-05 | 0.00831435 |
| ILMN_3163504 | METTL4          | -1.115151964 | 0.0002995  | 0.01489206 | 0.0002995  | 0.01335371 | 0.0000174  | 0.00183259 | 0.00000733 | 0.001185124 | 1 | 5.09531E-05 | 0.00725295 |
| ILMN_2822552 | UBTD2           | -1.115214016 | 0.00094262 | 0.02607154 | 0.00122569 | 0.02881591 | 0.00077456 | 0.02682534 | 0.00233485 | 0.051588335 | 0 | 0.00270263  | 0.06885567 |

|              |               |              |            |            |            |            |            |            |            |             |   |             |            |
|--------------|---------------|--------------|------------|------------|------------|------------|------------|------------|------------|-------------|---|-------------|------------|
| ILMN_2717678 | MUC13         | -1.115246667 | 0.0006399  | 0.0211535  | 0.0002995  | 0.01335371 | 0.00000878 | 0.00114799 | 0.0000157  | 0.00199766  | 1 | 5.97852E-05 | 0.00777325 |
| ILMN_2433547 | TRP53BP1      | -1.115309394 | 0.0002995  | 0.01489206 | 0.0002995  | 0.01335371 | 0.00000111 | 0.00024093 | 0.00000369 | 0.000720943 | 1 | 3.53859E-05 | 0.0058616  |
| ILMN_2788073 | HMOX1         | -1.115323968 | 0.00696781 | 0.09115463 | 0.00397039 | 0.06196763 | 0.00102352 | 0.0318673  | 0.00150214 | 0.039708565 | 0 | 0.001977658 | 0.05767797 |
| ILMN_1219208 | NOL6          | -1.115717769 | 0.0002995  | 0.01489206 | 0.0002995  | 0.01335371 | 0.00000446 | 0.00070872 | 0.0000167  | 0.00209125  | 1 | 0.000146035 | 0.01292295 |
| ILMN_1237430 | PHLPP         | -1.11586422  | 0.00122569 | 0.03054155 | 0.00122569 | 0.02881591 | 0.00024063 | 0.01226772 | 0.00035426 | 0.016129651 | 1 | 0.000844832 | 0.03651291 |
| ILMN_2723483 | POLR1B        | -1.115874714 | 0.00122569 | 0.03054155 | 0.0006399  | 0.01941092 | 0.0000273  | 0.00256319 | 0.0000442  | 0.003965776 | 1 | 0.000228655 | 0.01684049 |
| ILMN_2958484 | NLRX1         | -1.115901939 | 0.0006399  | 0.0211535  | 0.0006399  | 0.01941092 | 0.00000911 | 0.00116871 | 0.0000192  | 0.002327044 | 1 | 0.000157497 | 0.01350097 |
| ILMN_2661367 | HYOU1         | -1.11593221  | 0.0006399  | 0.0211535  | 0.0006399  | 0.01941092 | 0.00036758 | 0.01649923 | 0.00030102 | 0.014549744 | 1 | 0.000306263 | 0.02048222 |
| ILMN_2608145 | HDHD3         | -1.116104843 | 0.0002995  | 0.01489206 | 0.0002995  | 0.01335371 | 0.000037   | 0.00321551 | 0.000031   | 0.003134864 | 1 | 0.000228655 | 0.01684049 |
| ILMN_2791028 | APP           | -1.116183137 | 0.00276802 | 0.05133777 | 0.00276802 | 0.04845153 | 0.00012627 | 0.00779232 | 0.00047158 | 0.019546304 | 0 | 0.000540727 | 0.02850419 |
| ILMN_2524865 | CHI3L4        | -1.11643408  | 0.0056004  | 0.08017457 | 0.00420612 | 0.06441203 | 0.00119938 | 0.03484851 | 0.00116094 | 0.034266489 | 0 | 0.012346572 | 0.15195555 |
| ILMN_1254929 | RCL1          | -1.116461155 | 0.0002995  | 0.01489206 | 0.0002995  | 0.01335371 | 6.64E-07   | 0.0001602  | 0.00000774 | 0.001225133 | 1 | 9.21504E-05 | 0.00995203 |
| ILMN_2939185 | BCO56474      | -1.116523763 | 0.0002995  | 0.01489206 | 0.0002995  | 0.01335371 | 0.0000038  | 0.00063012 | 0.00000221 | 0.000472255 | 1 | 1.1878E-05  | 0.00314139 |
| ILMN_1228613 | PYCR1         | -1.116634512 | 0.0002995  | 0.01489206 | 0.0002995  | 0.01335371 | 0.00014129 | 0.00855208 | 0.000044   | 0.003965776 | 1 | 5.74504E-05 | 0.00761864 |
| ILMN_2877507 | PIGQ          | -1.11667927  | 0.00094262 | 0.02607154 | 0.0006399  | 0.01941092 | 0.0000468  | 0.00378362 | 0.00015238 | 0.009444363 | 1 | 0.000621233 | 0.03109305 |
| ILMN_2868131 | PIGT          | -1.117024219 | 0.00122569 | 0.03054155 | 0.00122569 | 0.02881591 | 0.0000929  | 0.00632166 | 0.00031205 | 0.014897503 | 1 | 0.0007895   | 0.03543767 |
| ILMN_1221943 | SDF2L1        | -1.117198955 | 0.00301234 | 0.05440113 | 0.0020184  | 0.03953445 | 0.00040857 | 0.01777361 | 0.00080514 | 0.027596907 | 0 | 0.001389407 | 0.04772897 |
| ILMN_2750515 | FOS           | -1.11747226  | 0.0002995  | 0.01489206 | 0.0002995  | 0.01335371 | 0.0000144  | 0.00162351 | 0.000053   | 0.004480844 | 1 | 0.000643034 | 0.03157309 |
| ILMN_3005873 | SORT1         | -1.11753372  | 0.0002995  | 0.01489206 | 0.0002995  | 0.01335371 | 4.28E-07   | 0.00011785 | 5.34E-07   | 0.000169129 | 1 | 3.83949E-05 | 0.00609954 |
| ILMN_2934448 | TJAP1         | -1.118088782 | 0.0002995  | 0.01489206 | 0.0002995  | 0.01335371 | 0.0000041  | 0.00066517 | 0.00000738 | 0.001188627 | 1 | 2.54447E-05 | 0.00475651 |
| ILMN_1240615 | OLFM1         | -1.118125635 | 0.0020184  | 0.04200694 | 0.00122569 | 0.02881591 | 0.0000124  | 0.00144846 | 0.000029   | 0.003012161 | 1 | 0.000284828 | 0.01943975 |
| ILMN_2706231 | SYNGR2        | -1.118544974 | 0.0020184  | 0.04200694 | 0.00227139 | 0.0429166  | 0.00192157 | 0.04705068 | 0.00155324 | 0.040345167 | 1 | 0.00270263  | 0.06885567 |
| ILMN_2776850 | GAS7          | -1.118567525 | 0.0006399  | 0.0211535  | 0.0006399  | 0.01941092 | 0.0000167  | 0.00178977 | 0.0000788  | 0.005900268 | 1 | 0.000140602 | 0.01273272 |
| ILMN_2815889 | GRWD1         | -1.118687936 | 0.0002995  | 0.01489206 | 0.0002995  | 0.01335371 | 0.0000165  | 0.00178433 | 0.0000203  | 0.002399815 | 1 | 3.99889E-05 | 0.00618393 |
| ILMN_1258394 | AARS          | -1.118724378 | 0.0002995  | 0.01489206 | 0.0002995  | 0.01335371 | 1.52E-08   | 0.00000944 | 3.84E-08   | 0.0000267   | 1 | 2.99936E-06 | 0.00146959 |
| ILMN_2685565 | TYMP          | -1.119134268 | 0.0002995  | 0.01489206 | 0.0002995  | 0.01335371 | 5.95E-07   | 0.00014895 | 0.00000154 | 0.000360893 | 1 | 6.47271E-05 | 0.00803428 |
| ILMN_1249313 | RABL3         | -1.119280075 | 0.0002995  | 0.01489206 | 0.0002995  | 0.01335371 | 0.00000837 | 0.00111027 | 0.0000181  | 0.002239201 | 1 | 8.19708E-05 | 0.00930671 |
| ILMN_2630459 | CXCR4         | -1.119486645 | 0.01664564 | 0.14895372 | 0.010097   | 0.10925562 | 0.00150846 | 0.04007654 | 0.00513661 | 0.082861032 | 0 | 0.009432496 | 0.13248473 |
| ILMN_2736690 | 2210411K11RIK | -1.119517225 | 0.0002995  | 0.01489206 | 0.0002995  | 0.01335371 | 0.00000361 | 0.00060385 | 3.36E-07   | 0.00012714  | 1 | 1.64374E-06 | 0.00107762 |
| ILMN_2987863 | PER2          | -1.119751625 | 0.0020184  | 0.04200694 | 0.00122569 | 0.02881591 | 0.00049047 | 0.0200248  | 0.00050945 | 0.020548879 | 1 | 0.001389407 | 0.04772897 |
| ILMN_2600744 | RGS16         | -1.119945836 | 0.0006399  | 0.0211535  | 0.0002995  | 0.01335371 | 0.0000862  | 0.00599563 | 0.0000228  | 0.002596277 | 1 | 5.09531E-05 | 0.00725295 |
| ILMN_3091641 | DAB2          | -1.120084423 | 0.0056004  | 0.08017457 | 0.00349473 | 0.0566205  | 0.00031561 | 0.01486932 | 0.00066486 | 0.024504648 | 0 | 0.003346676 | 0.07734743 |
| ILMN_2684651 | MSI2H         | -1.120151943 | 0.0006399  | 0.0211535  | 0.00094262 | 0.02430167 | 0.00015616 | 0.00905564 | 0.00017757 | 0.010475755 | 1 | 0.00036664  | 0.02284602 |
| ILMN_2425415 | UBE3B         | -1.12020859  | 0.0002995  | 0.01489206 | 0.0002995  | 0.01335371 | 2.27E-07   | 0.0000712  | 3.67E-07   | 0.000134456 | 1 | 2.65234E-05 | 0.00480383 |
| ILMN_2733733 | TLR2          | -1.120344381 | 0.00176049 | 0.0385938  | 0.00149689 | 0.03284241 | 0.0000662  | 0.00487536 | 0.00022244 | 0.012123944 | 1 | 0.000844832 | 0.03651291 |
| ILMN_2855261 | SLC25A39      | -1.120465978 | 0.0002995  | 0.01489206 | 0.0002995  | 0.01335371 | 0.00020524 | 0.01103168 | 0.00039608 | 0.017311138 | 1 | 0.00042277  | 0.02466001 |
| ILMN_2713464 | ABHD4         | -1.120638738 | 0.0002995  | 0.01489206 | 0.0002995  | 0.01335371 | 0.0000249  | 0.00241551 | 0.000033   | 0.003242217 | 1 | 2.76455E-05 | 0.00493033 |
| ILMN_2574165 | SLC7A11       | -1.120754955 | 0.0002995  | 0.01489206 | 0.0002995  | 0.01335371 | 0.00000981 | 0.00121884 | 0.0000519  | 0.004442214 | 1 | 7.0054E-05  | 0.00846962 |
| ILMN_1259069 | F730003H07RIK | -1.121065354 | 0.02201501 | 0.1748995  | 0.01513108 | 0.13869555 | 0.00567109 | 0.08820028 | 0.00888129 | 0.111410421 | 0 | 0.019156396 | 0.19024382 |
| ILMN_1252157 | A330102K04RIK | -1.121227393 | 0.0006399  | 0.0211535  | 0.0006399  | 0.01941092 | 0.0000632  | 0.00470014 | 0.0000802  | 0.005962962 | 1 | 0.001179468 | 0.04378253 |
| ILMN_2935032 | FBXL6         | -1.121239133 | 0.0002995  | 0.01489206 | 0.0002995  | 0.01335371 | 5.04E-07   | 0.00013181 | 0.00000874 | 0.00131658  | 1 | 0.000120719 | 0.01149104 |
| ILMN_1253919 | CCL3          | -1.121443309 | 0.00965407 | 0.11001819 | 0.00965407 | 0.10652405 | 0.00345725 | 0.06587166 | 0.00570388 | 0.08745013  | 0 | 0.009432496 | 0.13248473 |
| ILMN_1260585 | STFA2         | -1.121655647 | 0.00094262 | 0.02607154 | 0.0006399  | 0.01941092 | 0.00017433 | 0.00971369 | 0.00029736 | 0.01443844  | 1 | 0.000816732 | 0.0360345  |
| ILMN_3136638 | SNCA          | -1.121686063 | 0.00786961 | 0.09842737 | 0.00373333 | 0.05925673 | 0.00040521 | 0.01771    | 0.00102328 | 0.031817359 | 0 | 0.033458819 | 0.25026637 |
| ILMN_2936380 | SGPL1         | -1.121901135 | 0.0002995  | 0.01489206 | 0.0002995  | 0.01335371 | 0.0000477  | 0.00381669 | 0.0000543  | 0.004539402 | 1 | 6.47271E-05 | 0.00803428 |
| ILMN_2673211 | PFN1          | -1.121964524 | 0.00467484 | 0.07150478 | 0.00176049 | 0.03635757 | 0.0006747  | 0.02461215 | 0.00083935 | 0.02829048  | 0 | 0.005858907 | 0.10440833 |
| ILMN_1221451 | DHRX          | -1.12290417  | 0.00176049 | 0.0385938  | 0.00176049 | 0.03635757 | 0.00051556 | 0.02072359 | 0.0008206  | 0.027941947 | 1 | 0.0007895   | 0.03543767 |



|              |               |              |            |            |            |            |            |            |            |             |   |             |            |
|--------------|---------------|--------------|------------|------------|------------|------------|------------|------------|------------|-------------|---|-------------|------------|
| ILMN_2450491 | TRFR2         | -1.122926835 | 0.0002995  | 0.01489206 | 0.0002995  | 0.01335371 | 0.00000472 | 0.0007333  | 0.0000173  | 0.002159478 | 1 | 5.74504E-05 | 0.00761864 |
| ILMN_2790512 | 1110039B18RIK | -1.123368404 | 0.0002995  | 0.01489206 | 0.0002995  | 0.01335371 | 0.00000228 | 0.0004265  | 0.0000102  | 0.001443157 | 1 | 9.21504E-05 | 0.00995203 |
| ILMN_2894450 | SNX15         | -1.123418502 | 0.0002995  | 0.01489206 | 0.0002995  | 0.01335371 | 8.55E-08   | 0.0000344  | 6.06E-07   | 0.000186894 | 1 | 1.89821E-05 | 0.00409055 |
| ILMN_1223966 | LOC385959     | -1.123693602 | 0.00122569 | 0.03054155 | 0.00149689 | 0.03284241 | 0.00280154 | 0.05916668 | 0.00128214 | 0.036191446 | 0 | 0.001686537 | 0.05325863 |
| ILMN_2736347 | PRMT7         | -1.123726664 | 0.0002995  | 0.01489206 | 0.0002995  | 0.01335371 | 1.05E-09   | 0.00000111 | 1.93E-09   | 0.00000357  | 1 | 2.60834E-07 | 0.00041187 |
| ILMN_2491099 | XPOT          | -1.123742439 | 0.0002995  | 0.01489206 | 0.0002995  | 0.01335371 | 0.00000196 | 0.00037186 | 0.00000128 | 0.000311058 | 1 | 3.43889E-06 | 0.00156931 |
| ILMN_1232396 | EAR2          | -1.123772011 | 0.06497475 | 0.31131649 | 0.06269472 | 0.3035407  | 0.05031812 | 0.28834804 | 0.06049753 | 0.307739355 | 0 | 0.057275046 | 0.32303182 |
| ILMN_1218602 | G6PC3         | -1.124251076 | 0.00276802 | 0.05133777 | 0.00176049 | 0.03635757 | 0.00027886 | 0.01369203 | 0.00034532 | 0.015942739 | 0 | 0.001531347 | 0.05016159 |
| ILMN_3135781 | ANXA3         | -1.124627391 | 0.00122569 | 0.03054155 | 0.0006399  | 0.01941092 | 0.0000259  | 0.00247667 | 0.0000866  | 0.006296133 | 1 | 0.000873828 | 0.03714525 |
| ILMN_2892376 | DHX29         | -1.124906344 | 0.0002995  | 0.01489206 | 0.0002995  | 0.01335371 | 9.49E-07   | 0.00021238 | 0.00000258 | 0.000529628 | 1 | 2.384E-06   | 0.00130551 |
| ILMN_3161878 | BID           | -1.124973739 | 0.0002995  | 0.01489206 | 0.0002995  | 0.01335371 | 0.00000056 | 0.00014321 | 5.74E-07   | 0.000179299 | 1 | 2.61375E-06 | 0.00136712 |
| ILMN_2847787 | EMR1          | -1.125484607 | 0.00420612 | 0.06669083 | 0.00276802 | 0.04845153 | 0.0000979  | 0.00654917 | 0.0007017  | 0.025381142 | 0 | 0.00388914  | 0.08408165 |
| ILMN_2646878 | BLMH          | -1.12551314  | 0.0002995  | 0.01489206 | 0.0002995  | 0.01335371 | 0.00000334 | 0.00057008 | 0.0000062  | 0.001053987 | 1 | 1.41013E-05 | 0.00347315 |
| ILMN_2706853 | SCAMP1        | -1.125532389 | 0.0002995  | 0.01489206 | 0.0002995  | 0.01335371 | 4.75E-07   | 0.00012706 | 8.24E-07   | 0.00022965  | 1 | 1.41024E-05 | 0.00347315 |
| ILMN_2843698 | SMARCAL1      | -1.125762101 | 0.0002995  | 0.01489206 | 0.0002995  | 0.01335371 | 0.00000964 | 0.00121216 | 0.0000268  | 0.002862094 | 1 | 2.65234E-05 | 0.00480383 |
| ILMN_2717366 | OASL1         | -1.125975138 | 0.0006399  | 0.0211535  | 0.0002995  | 0.01335371 | 0.00013051 | 0.00798826 | 0.0000663  | 0.005180373 | 1 | 0.000317538 | 0.02078825 |
| ILMN_2546073 | WDR68         | -1.126231678 | 0.0002995  | 0.01489206 | 0.0002995  | 0.01335371 | 1.61E-07   | 0.0000542  | 2.79E-07   | 0.000110081 | 1 | 2.86522E-06 | 0.00144964 |
| ILMN_3128907 | CD33          | -1.126420996 | 0.00176049 | 0.0385938  | 0.00149689 | 0.03284241 | 0.00054271 | 0.02136604 | 0.00067862 | 0.02485273  | 1 | 0.002387591 | 0.06387081 |
| ILMN_2678355 | AMIGO2        | -1.126430355 | 0.0002995  | 0.01489206 | 0.0002995  | 0.01335371 | 9.13E-08   | 0.000036   | 1.85E-07   | 0.0000834   | 1 | 2.65193E-05 | 0.00480383 |
| ILMN_2655895 | AKT2          | -1.126825454 | 0.0002995  | 0.01489206 | 0.0002995  | 0.01335371 | 2.01E-07   | 0.0000653  | 1.53E-07   | 0.0000735   | 1 | 1.49656E-06 | 0.00102442 |
| ILMN_2625114 | CDKAL1        | -1.127010951 | 0.00122569 | 0.03054155 | 0.00094262 | 0.02430167 | 0.00000936 | 0.00118696 | 0.0000213  | 0.002477176 | 1 | 5.52021E-05 | 0.00760204 |
| ILMN_2667384 | SLC6A9        | -1.127361604 | 0.0002995  | 0.01489206 | 0.0002995  | 0.01335371 | 0.00000932 | 0.00118696 | 0.0000174  | 0.002159478 | 1 | 0.000246108 | 0.01770572 |
| ILMN_1222988 | LOC386268     | -1.127498485 | 0.00094262 | 0.02607154 | 0.0002995  | 0.01335371 | 0.00058613 | 0.02242668 | 0.00019971 | 0.011313575 | 1 | 0.001104095 | 0.04229821 |
| ILMN_2895557 | GFI1B         | -1.127535545 | 0.0006399  | 0.0211535  | 0.0002995  | 0.01335371 | 0.00000674 | 0.00095405 | 0.0000135  | 0.001778728 | 1 | 7.88278E-05 | 0.00901523 |
| ILMN_2925653 | EAR2          | -1.127584391 | 0.04792887 | 0.26510337 | 0.0460496  | 0.2570874  | 0.02741967 | 0.21097335 | 0.04301028 | 0.260513034 | 0 | 0.073688628 | 0.36208008 |
| ILMN_1216972 | CLEC4E        | -1.128106489 | 0.00373333 | 0.06184411 | 0.0020184  | 0.03953445 | 0.00014878 | 0.00879971 | 0.0003322  | 0.01550964  | 0 | 0.007560831 | 0.11797989 |
| ILMN_2652385 | BAZ2A         | -1.128274842 | 0.0020184  | 0.04200694 | 0.0020184  | 0.03953445 | 0.00086242 | 0.02851067 | 0.00124947 | 0.035680505 | 1 | 0.001482614 | 0.04961268 |
| ILMN_3158659 | C230096C10RIK | -1.128382209 | 0.00149689 | 0.03478153 | 0.00094262 | 0.02430167 | 0.00022091 | 0.01167139 | 0.00013978 | 0.008999194 | 1 | 0.000966442 | 0.03935694 |
| ILMN_2675223 | CD33          | -1.128563646 | 0.00094262 | 0.02607154 | 0.0006399  | 0.01941092 | 0.00001    | 0.00123611 | 0.0000453  | 0.004030508 | 1 | 0.000844832 | 0.03651291 |
| ILMN_2609073 | MGAT4B        | -1.128660345 | 0.0002995  | 0.01489206 | 0.0002995  | 0.01335371 | 0.0000179  | 0.00186806 | 0.00013637 | 0.008839388 | 1 | 0.000204627 | 0.01592867 |
| ILMN_2588055 | ACTB          | -1.128864948 | 0.31306407 | 0.64308013 | 0.32394852 | 0.65411508 | 0.24448523 | 0.59865801 | 0.32099244 | 0.661760783 | 0 | 0.345393797 | 0.69414296 |
| ILMN_2680686 | ALG12         | -1.129043435 | 0.0002995  | 0.01489206 | 0.0002995  | 0.01335371 | 0.0000444  | 0.00364378 | 0.0000134  | 0.001768921 | 1 | 1.29447E-05 | 0.00332893 |
| ILMN_1219820 | 1200002N14RIK | -1.129152823 | 0.0006399  | 0.0211535  | 0.0006399  | 0.01941092 | 0.00000983 | 0.00121884 | 0.0000795  | 0.0059192   | 1 | 9.95836E-05 | 0.01046347 |
| ILMN_2589893 | TBRG4         | -1.129261707 | 0.0006399  | 0.0211535  | 0.0006399  | 0.01941092 | 0.00017752 | 0.00983669 | 0.00024679 | 0.012817366 | 1 | 0.00036664  | 0.02284602 |
| ILMN_2975312 | FCER2A        | -1.129737894 | 0.00252097 | 0.04839275 | 0.0020184  | 0.03953445 | 0.00029365 | 0.01413478 | 0.00040153 | 0.017418469 | 1 | 0.002243019 | 0.06192516 |
| ILMN_2667033 | ZXDC          | -1.130679589 | 0.0002995  | 0.01489206 | 0.0002995  | 0.01335371 | 0.00000237 | 0.0004394  | 0.0000082  | 0.00127918  | 1 | 2.34111E-05 | 0.00450296 |
| ILMN_2622671 | ACSL1         | -1.131479516 | 0.0006399  | 0.0211535  | 0.0002995  | 0.01335371 | 3.66E-07   | 0.00010462 | 8.01E-07   | 0.000227328 | 1 | 9.15833E-06 | 0.00268109 |
| ILMN_2674324 | THOP1         | -1.131537424 | 0.0006399  | 0.0211535  | 0.0006399  | 0.01941092 | 0.0000524  | 0.00405887 | 0.00013374 | 0.008742949 | 1 | 0.000486846 | 0.02669165 |
| ILMN_1259290 | AKT3          | -1.131538979 | 0.0002995  | 0.01489206 | 0.0002995  | 0.01335371 | 6.4E-08    | 0.0000271  | 2.38E-07   | 0.000101599 | 1 | 3.28593E-06 | 0.00154495 |
| ILMN_2932539 | PRNG1         | -1.132133147 | 0.0002995  | 0.01489206 | 0.0002995  | 0.01335371 | 6.86E-07   | 0.00016462 | 7.68E-07   | 0.000219738 | 1 | 2.15328E-05 | 0.0043202  |
| ILMN_1253819 | PRKR2B        | -1.132148923 | 0.0002995  | 0.01489206 | 0.0002995  | 0.01335371 | 2.15E-08   | 0.0000125  | 1.03E-07   | 0.0000554   | 1 | 5.39498E-06 | 0.00202516 |
| ILMN_2995688 | EG433016      | -1.132494728 | 0.01944482 | 0.1617544  | 0.01642977 | 0.14555842 | 0.00686131 | 0.09782114 | 0.01011034 | 0.119739224 | 0 | 0.023367993 | 0.21022612 |
| ILMN_1238640 | 2310003H01RIK | -1.132552815 | 0.0006399  | 0.0211535  | 0.0006399  | 0.01941092 | 0.0000179  | 0.00186806 | 0.0000445  | 0.003979315 | 1 | 0.000264806 | 0.01861919 |
| ILMN_2696696 | GYP A         | -1.132817135 | 0.00276802 | 0.05133777 | 0.00149689 | 0.03284241 | 0.0000495  | 0.00391795 | 0.00035484 | 0.016129651 | 0 | 0.00270263  | 0.06885567 |
| ILMN_1225192 | NFKBID        | -1.133066098 | 0.0002995  | 0.01489206 | 0.0002995  | 0.01335371 | 3.36E-10   | 5.04E-07   | 1.02E-09   | 0.00000206  | 1 | 6.54696E-08 | 0.00025395 |
| ILMN_1243066 | IL1A          | -1.133413071 | 0.02008879 | 0.16526703 | 0.01426212 | 0.13387405 | 0.00667676 | 0.09657646 | 0.00714689 | 0.098567729 | 0 | 0.046032778 | 0.29096791 |
| ILMN_2937320 | SCHIP1        | -1.133751669 | 0.00094262 | 0.02607154 | 0.0002995  | 0.01335371 | 0.0000122  | 0.00143971 | 0.0000348  | 0.003370933 | 1 | 0.000176289 | 0.01444673 |

|              |               |              |            |            |            |            |            |            |            |             |   |             |            |
|--------------|---------------|--------------|------------|------------|------------|------------|------------|------------|------------|-------------|---|-------------|------------|
| ILMN_2731237 | D8ERTD82E     | -1.134047583 | 0.0002995  | 0.01489206 | 0.0002995  | 0.01335371 | 0.0000214  | 0.00216179 | 0.0000762  | 0.005756583 | 1 | 0.00040803  | 0.02413289 |
| ILMN_2599657 | FMNL3         | -1.134171185 | 0.0002995  | 0.01489206 | 0.0002995  | 0.01335371 | 0.00000477 | 0.00073484 | 0.00000943 | 0.00136995  | 1 | 1.81963E-05 | 0.00399552 |
| ILMN_2731550 | BRP17         | -1.134397653 | 0.0002995  | 0.01489206 | 0.0002995  | 0.01335371 | 0.00000353 | 0.00059317 | 0.00000482 | 0.000858959 | 1 | 6.47271E-05 | 0.00803428 |
| ILMN_2762189 | GPATCH1       | -1.134466014 | 0.0002995  | 0.01489206 | 0.0002995  | 0.01335371 | 3.36E-08   | 0.00001172 | 7.56E-07   | 0.000219513 | 1 | 9.99092E-06 | 0.00281847 |
| ILMN_2959291 | UPP1          | -1.13449718  | 0.00094262 | 0.02607154 | 0.00094262 | 0.02430167 | 0.00041631 | 0.01805945 | 0.00028061 | 0.013898949 | 1 | 0.001301631 | 0.04617913 |
| ILMN_2841289 | TNFAIP2       | -1.134827216 | 0.0002995  | 0.01489206 | 0.0002995  | 0.01335371 | 0.00000721 | 0.00099242 | 0.00000322 | 0.00064069  | 1 | 3.26018E-05 | 0.00557911 |
| ILMN_2671411 | KLC1          | -1.135147123 | 0.0002995  | 0.01489206 | 0.0002995  | 0.01335371 | 5.07E-08   | 0.0000227  | 3.61E-07   | 0.00013352  | 1 | 5.15939E-06 | 0.0020181  |
| ILMN_2596522 | MT1           | -1.135343672 | 0.0002995  | 0.01489206 | 0.0002995  | 0.01335371 | 0.00000371 | 0.00061709 | 4.42E-07   | 0.000148085 | 1 | 1.41024E-05 | 0.00347315 |
| ILMN_2939681 | LYZS          | -1.136569055 | 0.0056004  | 0.08017457 | 0.00444101 | 0.06659434 | 0.00127184 | 0.03607589 | 0.0015594  | 0.040474884 | 0 | 0.004644853 | 0.0931111  |
| ILMN_2964076 | TSPAN31       | -1.137017412 | 0.00122569 | 0.03054155 | 0.00094262 | 0.02430167 | 0.00012131 | 0.00760514 | 0.00019258 | 0.011039321 | 1 | 0.000504223 | 0.02732257 |
| ILMN_2692797 | SLC11A1       | -1.137029044 | 0.00094262 | 0.02607154 | 0.0002995  | 0.01335371 | 0.0000212  | 0.00215125 | 0.0000583  | 0.004702444 | 1 | 0.001259689 | 0.04555924 |
| ILMN_2693124 | RAB1B         | -1.137428102 | 0.01965954 | 0.16292455 | 0.01142074 | 0.11750706 | 0.00353484 | 0.06674889 | 0.00513165 | 0.08285783  | 0 | 0.015623977 | 0.17119804 |
| ILMN_1220769 | LMAN2L        | -1.138159096 | 0.0002995  | 0.01489206 | 0.0002995  | 0.01335371 | 1.01E-08   | 0.00000691 | 8.75E-08   | 0.0000485   | 1 | 5.74828E-07 | 0.00056929 |
| ILMN_2701271 | PLSCR1        | -1.138607055 | 0.0002995  | 0.01489206 | 0.0002995  | 0.01335371 | 1.15E-07   | 0.0000431  | 5.41E-08   | 0.0000344   | 1 | 5.21457E-07 | 0.00053938 |
| ILMN_2778289 | CXCL2         | -1.140544603 | 0.0264868  | 0.19288541 | 0.01404445 | 0.132649   | 0.0022071  | 0.05134118 | 0.00600321 | 0.089676275 | 0 | 0.041147128 | 0.27693959 |
| ILMN_1249362 | LOC386298     | -1.141212883 | 0.00122569 | 0.03054155 | 0.00122569 | 0.02881591 | 0.00022562 | 0.01181303 | 0.00059102 | 0.022623651 | 1 | 0.001141234 | 0.04287409 |
| ILMN_2661287 | AKP2          | -1.141256855 | 0.0002995  | 0.01489206 | 0.0002995  | 0.01335371 | 4.01E-07   | 0.00011255 | 7.15E-07   | 0.000216027 | 1 | 3.59833E-06 | 0.00158025 |
| ILMN_2846865 | ACTB          | -1.141333782 | 0.27330516 | 0.60657516 | 0.28441349 | 0.61784421 | 0.20397044 | 0.5535661  | 0.27555162 | 0.619558566 | 0 | 0.257914169 | 0.61888498 |
| ILMN_2925711 | DUSP6         | -1.142932506 | 0.0006399  | 0.0211535  | 0.0002995  | 0.01335371 | 9.85E-07   | 0.00021734 | 0.0000039  | 0.000746457 | 1 | 4.70154E-05 | 0.00688184 |
| ILMN_2803674 | S100A9        | -1.1442518   | 0.0020184  | 0.04200694 | 0.00094262 | 0.02430167 | 0.00032351 | 0.01511104 | 0.00019143 | 0.01098713  | 1 | 0.001633268 | 0.05224999 |
| ILMN_2866276 | CSF2RA        | -1.144341375 | 0.0002995  | 0.01489206 | 0.0002995  | 0.01335371 | 0.0000165  | 0.00178433 | 0.0000775  | 0.005835203 | 1 | 0.00040803  | 0.02413289 |
| ILMN_2524986 | EAR3          | -1.144901605 | 0.01707784 | 0.15127561 | 0.01858605 | 0.1562833  | 0.01561583 | 0.15736519 | 0.02212242 | 0.183826235 | 0 | 0.019643695 | 0.19233384 |
| ILMN_2479717 | PILRA         | -1.145002307 | 0.0002995  | 0.01489206 | 0.0002995  | 0.01335371 | 0.00000201 | 0.000379   | 0.00000853 | 0.001297207 | 1 | 2.65234E-05 | 0.00480383 |
| ILMN_2987709 | SLC15A3       | -1.145009054 | 0.0002995  | 0.01489206 | 0.0002995  | 0.01335371 | 0.0000166  | 0.00178433 | 0.0000144  | 0.001881854 | 1 | 0.000212368 | 0.01604723 |
| ILMN_1224736 | ZMIZ1         | -1.145106147 | 0.0002995  | 0.01489206 | 0.0002995  | 0.01335371 | 0.0000174  | 0.00183609 | 0.0000098  | 0.001399019 | 1 | 2.34111E-05 | 0.00450296 |
| ILMN_3155815 | 9830134C10RIK | -1.145114089 | 0.0002995  | 0.01489206 | 0.0002995  | 0.01335371 | 2.35E-07   | 0.0000718  | 0.00000169 | 0.000383182 | 1 | 6.16514E-06 | 0.0021257  |
| ILMN_2654754 | GP38          | -1.146427658 | 0.00854165 | 0.10305721 | 0.0056004  | 0.0767776  | 0.00506605 | 0.08253748 | 0.00357137 | 0.067411346 | 0 | 0.016875145 | 0.17884503 |
| ILMN_3104139 | RBM12         | -1.147016272 | 0.0002995  | 0.01489206 | 0.0002995  | 0.01335371 | 1.43E-08   | 0.00000901 | 1.38E-08   | 0.0000126   | 1 | 1.15863E-07 | 0.00029962 |
| ILMN_2712986 | CHI3L3        | -1.147371605 | 0.00122569 | 0.03054155 | 0.00149689 | 0.03284241 | 0.00087512 | 0.02868922 | 0.00073982 | 0.026207168 | 1 | 0.004127635 | 0.08709385 |
| ILMN_2757368 | CRELD2        | -1.147374056 | 0.0002995  | 0.01489206 | 0.0002995  | 0.01335371 | 2.3E-09    | 0.00000185 | 1.18E-08   | 0.0000119   | 1 | 2.74304E-07 | 0.00041187 |
| ILMN_2491202 | VNN3          | -1.148153174 | 0.0002995  | 0.01489206 | 0.0002995  | 0.01335371 | 4.51E-09   | 0.00000339 | 8.56E-09   | 0.0000105   | 1 | 2.24455E-07 | 0.00037313 |
| ILMN_1230766 | SCMH1         | -1.148605754 | 0.0002995  | 0.01489206 | 0.0002995  | 0.01335371 | 4.83E-08   | 0.0000223  | 1.86E-07   | 0.0000834   | 1 | 4.93323E-06 | 0.00196262 |
| ILMN_2771380 | CD52          | -1.149676808 | 0.00898742 | 0.10547593 | 0.0076447  | 0.09407685 | 0.00210007 | 0.0498312  | 0.00636866 | 0.092696085 | 0 | 0.009693098 | 0.13460577 |
| ILMN_1230708 | CLEC4A1       | -1.149760601 | 0.0002995  | 0.01489206 | 0.0002995  | 0.01335371 | 1.72E-07   | 0.0000571  | 0.00000112 | 0.000290018 | 1 | 1.53585E-05 | 0.00359242 |
| ILMN_2684575 | PCYOX1L       | -1.149890332 | 0.00122569 | 0.03054155 | 0.0006399  | 0.01941092 | 0.0000565  | 0.00431632 | 0.00014233 | 0.009037925 | 1 | 0.000438006 | 0.02507734 |
| ILMN_1218347 | MYLK          | -1.151233811 | 0.0002995  | 0.01489206 | 0.0002995  | 0.01335371 | 1.44E-09   | 0.00000136 | 5.7E-09    | 0.00000758  | 1 | 3.34766E-07 | 0.00044521 |
| ILMN_2601946 | 5033414K04RIK | -1.151524006 | 0.0002995  | 0.01489206 | 0.0002995  | 0.01335371 | 0.00000259 | 0.00046493 | 0.00000166 | 0.000379819 | 1 | 0.000317538 | 0.02078825 |
| ILMN_2835117 | CCL7          | -1.1516614   | 0.0002995  | 0.01489206 | 0.0002995  | 0.01335371 | 7.99E-07   | 0.00018585 | 0.00000889 | 0.001330104 | 1 | 9.5799E-05  | 0.01018072 |
| ILMN_2759484 | C3            | -1.152531108 | 0.0006399  | 0.0211535  | 0.0002995  | 0.01335371 | 0.0000685  | 0.00500185 | 0.0000487  | 0.004231895 | 1 | 0.000438006 | 0.02507734 |
| ILMN_1223416 | FER1L3        | -1.152772279 | 0.0002995  | 0.01489206 | 0.0002995  | 0.01335371 | 4.78E-08   | 0.0000223  | 3.94E-07   | 0.00013797  | 1 | 3.99889E-05 | 0.00618393 |
| ILMN_2901626 | TNFRSF21      | -1.153121675 | 0.00094262 | 0.02607154 | 0.0006399  | 0.01941092 | 0.00000168 | 0.00033087 | 0.0000142  | 0.001859837 | 1 | 0.00010758  | 0.01083883 |
| ILMN_2693895 | ACTA2         | -1.153348714 | 0.0002995  | 0.01489206 | 0.0002995  | 0.01335371 | 0.00000119 | 0.00025415 | 0.00000516 | 0.00090936  | 1 | 0.000151664 | 0.01324485 |
| ILMN_2777498 | IL1B          | -1.153646647 | 0.0056004  | 0.08017457 | 0.00420612 | 0.06441203 | 0.00135477 | 0.03741307 | 0.0017555  | 0.043416704 | 0 | 0.004379328 | 0.09051712 |
| ILMN_2789900 | CD177         | -1.154670942 | 0.0006399  | 0.0211535  | 0.0002995  | 0.01335371 | 0.00000234 | 0.00043645 | 0.00000186 | 0.000412865 | 1 | 1.89821E-05 | 0.00409055 |
| ILMN_2618423 | ZXDC          | -1.15475865  | 0.0002995  | 0.01489206 | 0.0002995  | 0.01335371 | 9.02E-10   | 9.76E-07   | 2E-09      | 0.00000357  | 1 | 1.04496E-07 | 0.00029962 |
| ILMN_1242457 | FPR2          | -1.155423301 | 0.00301234 | 0.05440113 | 0.0020184  | 0.03953445 | 0.00012201 | 0.00760514 | 0.00017744 | 0.010475755 | 0 | 0.00093456  | 0.03863507 |
| ILMN_2742075 | CD14          | -1.15645531  | 0.0032539  | 0.05678214 | 0.00252097 | 0.04602629 | 0.00038681 | 0.01712826 | 0.00049905 | 0.020287507 | 0 | 0.001389407 | 0.04772897 |

|              |               |              |            |            |            |            |            |            |            |             |   |             |            |
|--------------|---------------|--------------|------------|------------|------------|------------|------------|------------|------------|-------------|---|-------------|------------|
| ILMN_2868220 | INHBA         | -1.156681552 | 0.00122569 | 0.03054155 | 0.00094262 | 0.02430167 | 0.00016524 | 0.00937956 | 0.00024079 | 0.012650343 | 1 | 0.000470028 | 0.02607676 |
| ILMN_2674884 | SLC11A1       | -1.157414839 | 0.00094262 | 0.02607154 | 0.00094262 | 0.02430167 | 0.0000257  | 0.00247314 | 0.0000641  | 0.00508011  | 1 | 0.000438006 | 0.02507734 |
| ILMN_3161601 | SNCA          | -1.157946415 | 0.0020184  | 0.04200694 | 0.00149689 | 0.03284241 | 0.00000758 | 0.00103523 | 0.0000792  | 0.005917903 | 1 | 0.007351981 | 0.11667667 |
| ILMN_2705860 | TPSAB1        | -1.160383394 | 0.00094262 | 0.02607154 | 0.0006399  | 0.01941092 | 0.0000113  | 0.00149316 | 0.00006    | 0.004813511 | 1 | 0.000934606 | 0.03863507 |
| ILMN_2710905 | S100A8        | -1.163713512 | 0.0006399  | 0.0211535  | 0.0002995  | 0.01335371 | 0.0000119  | 0.00142619 | 0.0000147  | 0.001907372 | 1 | 0.000182986 | 0.01471244 |
| ILMN_2595732 | LOC100046232  | -1.165021501 | 0.0002995  | 0.01489206 | 0.0002995  | 0.01335371 | 0.000001   | 0.00021909 | 2.17E-07   | 0.0000944   | 1 | 5.15939E-06 | 0.0020181  |
| ILMN_2719732 | MS4A3         | -1.166305486 | 0.0006399  | 0.0211535  | 0.0002995  | 0.01335371 | 0.00000901 | 0.00116445 | 0.0000212  | 0.002477176 | 1 | 0.000540727 | 0.02850419 |
| ILMN_1221700 | ELA2          | -1.167300103 | 0.0002995  | 0.01489206 | 0.0002995  | 0.01335371 | 3.27E-09   | 0.00000253 | 1.67E-09   | 0.00000324  | 1 | 2.02641E-08 | 0.00018865 |
| ILMN_1224472 | CCL4          | -1.167531549 | 0.00094262 | 0.02607154 | 0.0006399  | 0.01941092 | 0.00000658 | 0.0009452  | 0.0000352  | 0.003396141 | 1 | 0.000255296 | 0.01817016 |
| ILMN_2728038 | ARHGAP24      | -1.167825732 | 0.0002995  | 0.01489206 | 0.0002995  | 0.01335371 | 4.47E-11   | 8.33E-08   | 1.1E-10    | 0.000000395 | 1 | 6.03547E-07 | 0.00057333 |
| ILMN_1252819 | PRMT7         | -1.167997376 | 0.0002995  | 0.01489206 | 0.0002995  | 0.01335371 | 8.95E-10   | 9.76E-07   | 7.15E-10   | 0.00000159  | 1 | 4.07147E-08 | 0.00024945 |
| ILMN_2538531 | LOC386360     | -1.168408104 | 0.0002995  | 0.01489206 | 0.0002995  | 0.01335371 | 0.00012104 | 0.00760514 | 0.00051103 | 0.020559076 | 1 | 0.001104095 | 0.04229821 |
| ILMN_2493826 | UGT1A10       | -1.169469481 | 0.0002995  | 0.01489206 | 0.0002995  | 0.01335371 | 1.33E-08   | 0.0000087  | 8.14E-08   | 0.0000468   | 1 | 3.13951E-06 | 0.00152224 |
| ILMN_2834379 | TGFB1         | -1.172758284 | 0.00176049 | 0.0385938  | 0.00122569 | 0.02881591 | 0.00093773 | 0.03009876 | 0.00024903 | 0.012894089 | 1 | 0.001068077 | 0.04167292 |
| ILMN_1222543 | UGT1A10       | -1.173528971 | 0.0002995  | 0.01489206 | 0.0002995  | 0.01335371 | 1.46E-09   | 0.00000136 | 4.37E-08   | 0.0000295   | 1 | 3.59866E-06 | 0.00158025 |
| ILMN_2983516 | SLC11A1       | -1.17650384  | 0.00122569 | 0.03054155 | 0.0006399  | 0.01941092 | 0.0000123  | 0.00144253 | 0.0000539  | 0.004524583 | 1 | 0.000643034 | 0.03157309 |
| ILMN_2426480 | 3830612M24    | -1.17764975  | 0.0006399  | 0.0211535  | 0.0002995  | 0.01335371 | 7.32E-08   | 0.0000304  | 0.00000104 | 0.000275608 | 1 | 9.21504E-05 | 0.00995203 |
| ILMN_2592554 | REXO1         | -1.182418789 | 0.0002995  | 0.01489206 | 0.0002995  | 0.01335371 | 2.19E-09   | 0.00000179 | 2.9E-08    | 0.0000218   | 1 | 7.3257E-07  | 0.00068198 |
| ILMN_1220548 | LRRC41        | -1.183163213 | 0.0002995  | 0.01489206 | 0.0002995  | 0.01335371 | 2.09E-08   | 0.0000125  | 3.74E-07   | 0.000136    | 1 | 9.99092E-06 | 0.00281847 |
| ILMN_1233336 | LOC386199     | -1.183990269 | 0.0006399  | 0.0211535  | 0.0006399  | 0.01941092 | 0.0000163  | 0.00177372 | 0.0000255  | 0.00279613  | 1 | 0.00040803  | 0.02413289 |
| ILMN_2646985 | ATF5          | -1.18420231  | 0.0002995  | 0.01489206 | 0.0002995  | 0.01335371 | 1.22E-07   | 0.0000454  | 0.00000123 | 0.000301817 | 1 | 2.15311E-05 | 0.0043202  |
| ILMN_2925094 | MPO           | -1.185131735 | 0.0002995  | 0.01489206 | 0.0002995  | 0.01335371 | 0.00000078 | 0.0001843  | 0.00000115 | 0.000292494 | 1 | 1.89821E-05 | 0.00409055 |
| ILMN_1252076 | LYZ2          | -1.187850205 | 0.00349473 | 0.05908105 | 0.00149689 | 0.03284241 | 0.0000728  | 0.00528008 | 0.00032836 | 0.015438431 | 0 | 0.002314272 | 0.06295874 |
| ILMN_2948143 | SLC7A11       | -1.188505133 | 0.0002995  | 0.01489206 | 0.0002995  | 0.01335371 | 5.44E-07   | 0.00014066 | 0.00000159 | 0.000369569 | 1 | 0.000120719 | 0.01149104 |
| ILMN_1219230 | LOC100043402  | -1.188859089 | 0.0002995  | 0.01489206 | 0.0002995  | 0.01335371 | 0.00000132 | 0.00027167 | 0.00000103 | 0.000274668 | 1 | 2.15328E-05 | 0.0043202  |
| ILMN_1230140 | LOC385923     | -1.189899209 | 0.0002995  | 0.01489206 | 0.0002995  | 0.01335371 | 0.00000304 | 0.00052754 | 0.0000057  | 0.000979318 | 1 | 3.53859E-05 | 0.0058616  |
| ILMN_3162125 | GRM6          | -1.194679101 | 0.0002995  | 0.01489206 | 0.0002995  | 0.01335371 | 2.08E-07   | 0.0000667  | 1.2E-08    | 0.0000119   | 1 | 4.9657E-07  | 0.00052531 |
| ILMN_2771176 | CCL7          | -1.196175382 | 0.0002995  | 0.01489206 | 0.0002995  | 0.01335371 | 1.02E-11   | 2.5E-08    | 4.19E-10   | 0.000000976 | 1 | 4.07997E-07 | 0.00049976 |
| ILMN_2847115 | GPR109A       | -1.199553298 | 0.0006399  | 0.0211535  | 0.0006399  | 0.01941092 | 0.00000482 | 0.0007403  | 0.0000154  | 0.001964139 | 1 | 0.00011618  | 0.0112429  |
| ILMN_2758029 | PRTN3         | -1.205025411 | 0.0002995  | 0.01489206 | 0.0002995  | 0.01335371 | 1.53E-10   | 2.64E-07   | 3.43E-10   | 0.00000084  | 1 | 5.59305E-08 | 0.00024945 |
| ILMN_2722996 | SIRPA         | -1.209776171 | 0.0002995  | 0.01489206 | 0.0002995  | 0.01335371 | 1.66E-09   | 0.00000149 | 3.18E-09   | 0.00000462  | 1 | 3.28593E-06 | 0.00154495 |
| ILMN_2657828 | RHBDP1        | -1.216435604 | 0.0002995  | 0.01489206 | 0.0002995  | 0.01335371 | 2.44E-12   | 9.46E-09   | 1.36E-10   | 0.000000429 | 1 | 5.89499E-08 | 0.00024945 |
| ILMN_2712075 | LCN2          | -1.216711224 | 0.0006399  | 0.0211535  | 0.0002995  | 0.01335371 | 0.00000262 | 0.00046695 | 0.00000288 | 0.000577427 | 1 | 2.44059E-05 | 0.00463717 |
| ILMN_2878071 | LYZ           | -1.22864681  | 0.0002995  | 0.01489206 | 0.0002995  | 0.01335371 | 5.41E-08   | 0.000024   | 0.00000139 | 0.000336099 | 1 | 7.57938E-05 | 0.00879794 |
| ILMN_2705628 | CLEC4D        | -1.228745779 | 0.0006399  | 0.0211535  | 0.0006399  | 0.01941092 | 0.00000062 | 0.00015362 | 0.0000039  | 0.000746457 | 1 | 7.0054E-05  | 0.00846962 |
| ILMN_1233982 | LOC270589     | -1.22932799  | 0.0002995  | 0.01489206 | 0.0002995  | 0.01335371 | 0.00000694 | 0.00097871 | 0.00000394 | 0.000746457 | 1 | 4.51564E-05 | 0.00675851 |
| ILMN_1377923 | ACTB          | -1.230879389 | 0.07635019 | 0.3372365  | 0.05022289 | 0.26966529 | 0.00918324 | 0.11590351 | 0.03014873 | 0.215797746 | 0 | 0.014835081 | 0.16656218 |
| ILMN_1249030 | MPO           | -1.231747939 | 0.0002995  | 0.01489206 | 0.0002995  | 0.01335371 | 0.0000017  | 0.00033473 | 0.0000195  | 0.002344998 | 1 | 0.00022037  | 0.01646479 |
| ILMN_2538242 | LOC386144     | -1.239189285 | 0.0002995  | 0.01489206 | 0.0002995  | 0.01335371 | 0.000015   | 0.00166908 | 0.0000107  | 0.001483462 | 1 | 0.000135361 | 0.01242731 |
| ILMN_2993314 | CLEC4N        | -1.244916169 | 0.0006399  | 0.0211535  | 0.0002995  | 0.01335371 | 0.00000115 | 0.00024883 | 0.000015   | 0.001929689 | 1 | 0.000163541 | 0.01374071 |
| ILMN_2750842 | M610027L16RIK | -1.245539485 | 0.0002995  | 0.01489206 | 0.0002995  | 0.01335371 | 0.00000254 | 0.00046434 | 0.00000545 | 0.000950899 | 1 | 6.44447E-06 | 0.00218957 |
| ILMN_2600421 | MPO           | -1.29293209  | 0.0002995  | 0.01489206 | 0.0002995  | 0.01335371 | 8.09E-10   | 9.34E-07   | 2.37E-08   | 0.0000187   | 1 | 8.76731E-06 | 0.00261597 |
| ILMN_2763245 | CXCL1         | -1.3         | 0.0006399  | 0.0211535  | 0.0002995  | 0.01335371 | 2.37E-07   | 0.0000718  | 0.00000181 | 0.000406    | 1 | 9.95836E-05 | 0.01046347 |
| ILMN_1253874 | SERPIN2       | -1.31        | 0.0002995  | 0.01489206 | 0.0002995  | 0.01335371 | 6.55E-10   | 8.24E-07   | 9.01E-09   | 0.0000105   | 1 | 2.38377E-06 | 0.00130551 |
| ILMN_1215076 | F830002E14RIK | -1.32        | 0.0020184  | 0.04200694 | 0.00122569 | 0.02881591 | 0.00115136 | 0.03420847 | 0.000886   | 0.0292      | 1 | 0.001344859 | 0.0469611  |
| ILMN_2725259 | IL2           | -1.37        | 0.0002995  | 0.01489206 | 0.0002995  | 0.01335371 | 5.55E-14   | 6.46E-10   | 1.82E-11   | 0.000000121 | 1 | 9.40233E-09 | 0.00012222 |
