# Supplementary material for: Comparing the Biological Impact of Glatiramer Acetate with the Biological Impact of a Generic
Source: PubMed Central journal article supplement (PMC3885444; doi:10.1371/journal.pone.0083757), 2014-01-08
Supplement: pone.0083757.s014.pdf [file pone.0083757.s014.pdf]

| Reference Set                                  | User Set        | N     | K    | n   | k  | P        | BHP_P    |
|------------------------------------------------|-----------------|-------|------|-----|----|----------|----------|
| BLALOCK_ALZHEIMERS_DISEASE_UP                  | wilcox_up_in_GA | 31847 | 1691 | 392 | 54 | 0        | 0        |
| PILON_KLF1_TARGETS_DN                          | wilcox_up_in_GA | 31847 | 1972 | 392 | 80 | 0        | 0        |
| MEMBRANE                                       | wilcox_up_in_GA | 31847 | 1994 | 392 | 65 | 0        | 0        |
| GRAESSMANN_APOPTOSIS_BY_DOXORUBICIN_DN         | wilcox_up_in_GA | 31847 | 1781 | 392 | 60 | 0        | 0        |
| GGGAGGRR_V\$MAZ_Q6                             | wilcox_up_in_GA | 31847 | 2274 | 392 | 69 | 0        | 0        |
| SIGNAL_TRANSDUCTION                            | wilcox_up_in_GA | 31847 | 1634 | 392 | 60 | 0        | 0        |
| TTGTTT_V\$FOXO4_01                             | wilcox_up_in_GA | 31847 | 2061 | 392 | 64 | 0        | 0        |
| DUTERTRE ESTRADIOL_RESPONSE_24HR_DN            | wilcox_up_in_GA | 31847 | 505  | 392 | 30 | 0        | 0        |
| GNF2_MATK                                      | wilcox_up_in_GA | 31847 | 25   | 392 | 10 | 0        | 0        |
| PID_TCR_PATHWAY                                | wilcox_up_in_GA | 31847 | 66   | 392 | 14 | 3.55E-12 | 8.55E-10 |
| MEMBRANE_PART                                  | wilcox_up_in_GA | 31847 | 1670 | 392 | 53 | 8.99E-12 | 1.97E-09 |
| BIOPOLYMER_METABOLIC_PROCESS                   | wilcox_up_in_GA | 31847 | 1684 | 392 | 53 | 1.10E-11 | 2.20E-09 |
| PID_CD8TCRDOWNSTREAMPATHWAY                    | wilcox_up_in_GA | 31847 | 65   | 392 | 12 | 4.02E-11 | 7.45E-09 |
| REACTOME_TCR_SIGNALING                         | wilcox_up_in_GA | 31847 | 54   | 392 | 13 | 4.93E-11 | 8.47E-09 |
| PID_CD8TCRPATHWAY                              | wilcox_up_in_GA | 31847 | 53   | 392 | 12 | 7.51E-11 | 1.21E-08 |
| SMID_BREAST_CANCER_NORMAL_LIKE_UP              | wilcox_up_in_GA | 31847 | 476  | 392 | 48 | 9.86E-11 | 1.44E-08 |
| PUJANA_ATM_PCC_NETWORK                         | wilcox_up_in_GA | 31847 | 1442 | 392 | 52 | 1.02E-10 | 1.44E-08 |
| GNF2_PTPN4                                     | wilcox_up_in_GA | 31847 | 51   | 392 | 11 | 1.17E-10 | 1.57E-08 |
| MODULE_64                                      | wilcox_up_in_GA | 31847 | 518  | 392 | 28 | 1.30E-10 | 1.59E-08 |
| PID_IL12_STAT4PATHWAY                          | wilcox_up_in_GA | 31847 | 33   | 392 | 9  | 1.37E-10 | 1.59E-08 |
| ZHENG_BOUND_BY_FOXP3                           | wilcox_up_in_GA | 31847 | 491  | 392 | 56 | 1.42E-10 | 1.59E-08 |
| DIAZ_CHRONIC_MEYLOGENOUS_LEUKEMIA_UP           | wilcox_up_in_GA | 31847 | 1382 | 392 | 51 | 1.46E-10 | 1.59E-08 |
| CHEN_METABOLIC_SYNDROM_NETWORK                 | wilcox_up_in_GA | 31847 | 1210 | 392 | 46 | 1.72E-10 | 1.79E-08 |
| MODULE_75                                      | wilcox_up_in_GA | 31847 | 399  | 392 | 29 | 1.86E-10 | 1.80E-08 |
| MODULE_84                                      | wilcox_up_in_GA | 31847 | 549  | 392 | 38 | 1.87E-10 | 1.80E-08 |
| MARSON_BOUND_BY_FOXP3_UNSTIMULATED             | wilcox_up_in_GA | 31847 | 1229 | 392 | 66 | 2.04E-10 | 1.80E-08 |
| LINDGREN_BLADDER_CANCER_CLUSTER_2B             | wilcox_up_in_GA | 31847 | 392  | 392 | 29 | 2.12E-10 | 1.80E-08 |
| SANSOM_APC_TARGETS_DN                          | wilcox_up_in_GA | 31847 | 366  | 392 | 25 | 2.16E-10 | 1.80E-08 |
| MODULE_46                                      | wilcox_up_in_GA | 31847 | 395  | 392 | 29 | 2.27E-10 | 1.80E-08 |
| SMID_BREAST_CANCER_LUMINAL_B_DN                | wilcox_up_in_GA | 31847 | 564  | 392 | 30 | 2.32E-10 | 1.80E-08 |
| GCACTTT,MIR-17-5P,MIR-20A,MIR-106A,MIR-106B,MI | wilcox_up_in_GA | 31847 | 595  | 392 | 33 | 2.46E-10 | 1.80E-08 |
| NUYTEN_EZH2_TARGETS_UP                         | wilcox_up_in_GA | 31847 | 1037 | 392 | 44 | 2.46E-10 | 1.80E-08 |
| KUMAR_TARGETS_OF_MLL_AF9_FUSION                | wilcox_up_in_GA | 31847 | 405  | 392 | 26 | 2.47E-10 | 1.80E-08 |
| MARSON_BOUND_BY_FOXP3_STIMULATED               | wilcox_up_in_GA | 31847 | 1022 | 392 | 54 | 2.65E-10 | 1.83E-08 |
| GOBERT_OLIGODENDROCYTE_DIFFERENTIATION_DN      | wilcox_up_in_GA | 31847 | 1080 | 392 | 44 | 2.67E-10 | 1.83E-08 |
| REACTOME_IMMUNE_SYSTEM                         | wilcox_up_in_GA | 31847 | 933  | 392 | 51 | 2.82E-10 | 1.88E-08 |

| MODULE_45                                  | wilcox_up_in_GA      | 31847 | 583  | 392 | 33 | 2.99E-10 | 1.95E-08 |
|--------------------------------------------|----------------------|-------|------|-----|----|----------|----------|
| ~~~~~                                      |                      |       |      |     |    |          |          |
| Reference Set                              | User Set             | N     | K    | n   | k  | P        | BHP_P    |
| CYTOPLASM                                  | wilcox_up_in_generic | 31847 | 2131 | 439 | 68 | 0        | 0        |
| BLALOCK_ALZHEIMERS_DISEASE_UP              | wilcox_up_in_generic | 31847 | 1691 | 439 | 59 | 0        | 0        |
| PUJANA_BRCA1_PCC_NETWORK                   | wilcox_up_in_generic | 31847 | 1652 | 439 | 57 | 0        | 0        |
| PILON_KLF1_TARGETS_DN                      | wilcox_up_in_generic | 31847 | 1972 | 439 | 81 | 0        | 0        |
| GRAESSMANN_APOPTOSIS_BY_DOXORUBICIN_DN     | wilcox_up_in_generic | 31847 | 1781 | 439 | 68 | 0        | 0        |
| DIAZ_CHRONIC_MEYLOGENOUS_LEUKEMIA_UP       | wilcox_up_in_generic | 31847 | 1382 | 439 | 56 | 6.56E-11 | 2.51E-08 |
| KRIGE_RESPONSE_TO_TOSEDOSTAT_6HR_UP        | wilcox_up_in_generic | 31847 | 953  | 439 | 46 | 1.20E-10 | 3.57E-08 |
| KRIGE_RESPONSE_TO_TOSEDOSTAT_24HR_DN       | wilcox_up_in_generic | 31847 | 1011 | 439 | 51 | 1.24E-10 | 3.57E-08 |
| GRAESSMANN_APOPTOSIS_BY_DOXORUBICIN_UP     | wilcox_up_in_generic | 31847 | 1142 | 439 | 46 | 2.24E-10 | 5.64E-08 |
| REACTOME_IMMUNE_SYSTEM                     | wilcox_up_in_generic | 31847 | 933  | 439 | 41 | 2.48E-10 | 5.64E-08 |
| KRIGE_RESPONSE_TO_TOSEDOSTAT_6HR_DN        | wilcox_up_in_generic | 31847 | 911  | 439 | 45 | 2.74E-10 | 5.64E-08 |
| CHEN_METABOLIC_SYNDROM_NETWORK             | wilcox_up_in_generic | 31847 | 1210 | 439 | 48 | 2.95E-10 | 5.64E-08 |
| PROTEIN_METABOLIC_PROCESS                  | wilcox_up_in_generic | 31847 | 1231 | 439 | 48 | 3.86E-10 | 6.58E-08 |
| LEE_BMP2_TARGETS_DN                        | wilcox_up_in_generic | 31847 | 882  | 439 | 52 | 4.01E-10 | 6.58E-08 |
| WEI_MYCN_TARGETS_WITH_E_BOX                | wilcox_up_in_generic | 31847 | 795  | 439 | 39 | 5.50E-10 | 8.42E-08 |
| MODULE_5                                   | wilcox_up_in_generic | 31847 | 434  | 439 | 26 | 6.51E-10 | 9.34E-08 |
| GGGCGGR_V\$SP1_Q6                          | wilcox_up_in_generic | 31847 | 2940 | 439 | 95 | 7.24E-10 | 9.78E-08 |
| BYSTRYKH_HEMATOPOIESIS_STEM_CELL_QTL_TRANS | wilcox_up_in_generic | 31847 | 882  | 439 | 38 | 1.16E-09 | 1.48E-07 |
| ENK_UV_RESPONSE_EPIDERMIS_UP               | wilcox_up_in_generic | 31847 | 293  | 439 | 21 | 1.31E-09 | 1.59E-07 |
| MONNIER_POSTRADIATION_TUMOR_ESCAPE_UP      | wilcox_up_in_generic | 31847 | 393  | 439 | 24 | 1.69E-09 | 1.94E-07 |
| BROWN_MYELOID_CELL_DEVELOPMENT_UP          | wilcox_up_in_generic | 31847 | 165  | 439 | 16 | 1.91E-09 | 2.09E-07 |
| SENESE_HDAC3_TARGETS_UP                    | wilcox_up_in_generic | 31847 | 501  | 439 | 27 | 2.47E-09 | 2.58E-07 |
| BIOPOLYMER_METABOLIC_PROCESS               | wilcox_up_in_generic | 31847 | 1684 | 439 | 55 | 2.71E-09 | 2.71E-07 |
| GNF2_CARD15                                | wilcox_up_in_generic | 31847 | 70   | 439 | 11 | 3.41E-09 | 3.26E-07 |
| DODD_NASOPHARYNGEAL_CARCINOMA_DN           | wilcox_up_in_generic | 31847 | 1375 | 439 | 48 | 4.41E-09 | 4.05E-07 |
| SCGGAAGY_V\$ELK1_02                        | wilcox_up_in_generic | 31847 | 1199 | 439 | 44 | 4.79E-09 | 4.23E-07 |
| VERHAAK_AML_WITH_NPM1_MUTATED_UP           | wilcox_up_in_generic | 31847 | 183  | 439 | 16 | 6.55E-09 | 5.57E-07 |
| CAIRO_HEPATOBLASTOMA_CLASSES_UP            | wilcox_up_in_generic | 31847 | 605  | 439 | 29 | 8.42E-09 | 6.91E-07 |
| GNF2_CD1D                                  | wilcox_up_in_generic | 31847 | 45   | 439 | 9  | 9.51E-09 | 7.53E-07 |
| RUTELLA_RESPONSE_TO_CSF2RB_AND_IL4_UP      | wilcox_up_in_generic | 31847 | 338  | 439 | 21 | 1.29E-08 | 9.69E-07 |
| LI_INDUCED_T_TO_NATURAL_KILLER_UP          | wilcox_up_in_generic | 31847 | 307  | 439 | 20 | 1.31E-08 | 9.69E-07 |
| BOYLAN_MULTIPLE_MYELOMA_C_D_DN             | wilcox_up_in_generic | 31847 | 252  | 439 | 18 | 1.73E-08 | 1.24E-06 |
| KEGG_TOLL_LIKE_RECEPTOR_SIGNALING_PATHWAY  | wilcox_up_in_generic | 31847 | 102  | 439 | 12 | 1.83E-08 | 1.27E-06 |

|                                            |                      |       |      |     |    |          |          |
|--------------------------------------------|----------------------|-------|------|-----|----|----------|----------|
| MODULE_6                                   | wilcox_up_in_generic | 31847 | 416  | 439 | 23 | 2.30E-08 | 1.55E-06 |
| RUTELLA_RESPONSE_TO_HGF_UP                 | wilcox_up_in_generic | 31847 | 418  | 439 | 23 | 2.51E-08 | 1.65E-06 |
| MODULE_3                                   | wilcox_up_in_generic | 31847 | 385  | 439 | 22 | 2.59E-08 | 1.65E-06 |
| CHARAFE_BREAST_CANCER_LUMINAL_VS_BASAL_DN  | wilcox_up_in_generic | 31847 | 455  | 439 | 24 | 2.78E-08 | 1.73E-06 |
| MARTENS_BOUND_BY_PML_RARA_FUSION           | wilcox_up_in_generic | 31847 | 456  | 439 | 24 | 2.90E-08 | 1.75E-06 |
| GNF2_CD33                                  | wilcox_up_in_generic | 31847 | 52   | 439 | 9  | 3.62E-08 | 2.13E-06 |
| NUCLEOBASENUCLEOSIDENUCLEOTIDE_AND_NUCLEIC | wilcox_up_in_generic | 31847 | 1244 | 439 | 43 | 3.88E-08 | 2.23E-06 |
| TONKS_TARGETS_OF_RUNX1_RUNX1T1_FUSION_ERY  | wilcox_up_in_generic | 31847 | 157  | 439 | 14 | 4.29E-08 | 2.41E-06 |
| FOSTER_KDM1A_TARGETS_DN                    | wilcox_up_in_generic | 31847 | 211  | 439 | 16 | 4.64E-08 | 2.54E-06 |
| NUYTEN_EZH2_TARGETS_UP                     | wilcox_up_in_generic | 31847 | 1037 | 439 | 38 | 5.75E-08 | 3.05E-06 |
| MARKEY_RB1_ACUTE_LOF_UP                    | wilcox_up_in_generic | 31847 | 215  | 439 | 16 | 6.02E-08 | 3.05E-06 |
| CASORELLI_ACUTE_PROMYELOCYTIC_LEUKEMIA_DN  | wilcox_up_in_generic | 31847 | 663  | 439 | 29 | 6.04E-08 | 3.05E-06 |
| MODULE_16                                  | wilcox_up_in_generic | 31847 | 511  | 439 | 25 | 6.11E-08 | 3.05E-06 |
| BRUINS_UVC_RESPONSE_LATE                   | wilcox_up_in_generic | 31847 | 1137 | 439 | 40 | 7.46E-08 | 3.65E-06 |
| ZHANG_TLX_TARGETS_36HR_UP                  | wilcox_up_in_generic | 31847 | 221  | 439 | 16 | 8.79E-08 | 4.21E-06 |
| RODWELL_AGING_KIDNEY_UP                    | wilcox_up_in_generic | 31847 | 487  | 439 | 24 | 9.84E-08 | 4.61E-06 |
| SEKI_INFLAMMATORY_RESPONSE_LPS_UP          | wilcox_up_in_generic | 31847 | 77   | 439 | 10 | 1.08E-07 | 4.96E-06 |
| HESS_TARGETS_OF_HOXA9_AND_MEIS1_DN         | wilcox_up_in_generic | 31847 | 77   | 439 | 10 | 1.08E-07 | 4.96E-06 |
| IVANOVA_HEMATOPOIESIS_EARLY_PROGENITOR     | wilcox_up_in_generic | 31847 | 532  | 439 | 25 | 1.31E-07 | 5.77E-06 |
| CELLULAR_PROTEIN_METABOLIC_PROCESS         | wilcox_up_in_generic | 31847 | 1117 | 439 | 39 | 1.33E-07 | 5.77E-06 |
| ACEVEDO_LIVER_TUMOR_VS_NORMAL_ADJACENT_TI  | wilcox_up_in_generic | 31847 | 863  | 439 | 33 | 1.69E-07 | 7.21E-06 |
| WANG_IMMORTALIZED_BY_HOXA9_AND_MEIS1_UP    | wilcox_up_in_generic | 31847 | 31   | 439 | 7  | 1.78E-07 | 7.36E-06 |
| RYTTCCTG_V\$ETS2_B                         | wilcox_up_in_generic | 31847 | 1085 | 439 | 38 | 1.80E-07 | 7.36E-06 |
| CELLULAR_MACROMOLECULE_METABOLIC_PROCESS   | wilcox_up_in_generic | 31847 | 1131 | 439 | 39 | 1.83E-07 | 7.36E-06 |
| KOINUMA_TARGETS_OF_SMAD2_OR_SMAD3          | wilcox_up_in_generic | 31847 | 824  | 439 | 32 | 1.86E-07 | 7.37E-06 |
| KRIGE_RESPONSE_TO_TOSEDOSTAT_24HR_UP       | wilcox_up_in_generic | 31847 | 783  | 439 | 31 | 1.91E-07 | 7.45E-06 |
| MODULE_45                                  | wilcox_up_in_generic | 31847 | 583  | 439 | 26 | 2.03E-07 | 7.76E-06 |
| RASHI_RESPONSE_TO_IONIZING_RADIATION_2     | wilcox_up_in_generic | 31847 | 127  | 439 | 12 | 2.09E-07 | 7.88E-06 |
| RESPONSE_TO_STRESS                         | wilcox_up_in_generic | 31847 | 508  | 439 | 24 | 2.13E-07 | 7.88E-06 |
| LENAOUR_DENDRITIC_CELL_MATURATION_DN       | wilcox_up_in_generic | 31847 | 128  | 439 | 12 | 2.28E-07 | 8.31E-06 |
| MODULE_84                                  | wilcox_up_in_generic | 31847 | 549  | 439 | 25 | 2.37E-07 | 8.49E-06 |
| GROSS_HYPOXIA_VIA_ELK3_UP                  | wilcox_up_in_generic | 31847 | 209  | 439 | 15 | 2.48E-07 | 8.76E-06 |
| GTGCCAA,MIR-96                             | wilcox_up_in_generic | 31847 | 303  | 439 | 18 | 2.73E-07 | 9.49E-06 |
| MARTENS_TRETINOIN_RESPONSE_DN              | wilcox_up_in_generic | 31847 | 841  | 439 | 32 | 2.92E-07 | 1.00E-05 |
| MGGAAGTG_V\$GABP_B                         | wilcox_up_in_generic | 31847 | 757  | 439 | 30 | 2.96E-07 | 1.00E-05 |
| ACEVEDO_LIVER_CANCER_UP                    | wilcox_up_in_generic | 31847 | 973  | 439 | 35 | 3.01E-07 | 1.00E-05 |
| NEGATIVE_REGULATION_OF_BIOLOGICAL_PROCESS  | wilcox_up_in_generic | 31847 | 677  | 439 | 28 | 3.18E-07 | 1.04E-05 |
| MODULE_118                                 | wilcox_up_in_generic | 31847 | 410  | 439 | 21 | 3.33E-07 | 1.08E-05 |

|                                           |                      |       |      |     |    |          |          |
|-------------------------------------------|----------------------|-------|------|-----|----|----------|----------|
| GAL_LEUKEMIC_STEM_CELL_DN                 | wilcox_up_in_generic | 31847 | 244  | 439 | 16 | 3.38E-07 | 1.08E-05 |
| MOOTHA_MITOCHONDRIA                       | wilcox_up_in_generic | 31847 | 447  | 439 | 22 | 3.44E-07 | 1.08E-05 |
| LINDSTEDT_DENDRITIC_CELL_MATURATION_A     | wilcox_up_in_generic | 31847 | 67   | 439 | 9  | 3.49E-07 | 1.08E-05 |
| MEMBRANE                                  | wilcox_up_in_generic | 31847 | 1994 | 439 | 56 | 3.55E-07 | 1.09E-05 |
| TARTE_PLASMA_CELL_VS_PLASMABLAST_DN       | wilcox_up_in_generic | 31847 | 309  | 439 | 18 | 3.64E-07 | 1.10E-05 |
| NEGATIVE_REGULATION_OF_CELLULAR_PROCESS   | wilcox_up_in_generic | 31847 | 646  | 439 | 27 | 4.22E-07 | 1.25E-05 |
| GRAESSMANN_RESPONSE_TO_MC_AND_DOXORUBIC   | wilcox_up_in_generic | 31847 | 770  | 439 | 30 | 4.23E-07 | 1.25E-05 |
| GNF2_CD14                                 | wilcox_up_in_generic | 31847 | 35   | 439 | 7  | 4.35E-07 | 1.26E-05 |
| RPS14_DN.V1_UP                            | wilcox_up_in_generic | 31847 | 192  | 439 | 14 | 5.14E-07 | 1.47E-05 |
| PUJANA_CHEK2_PCC_NETWORK                  | wilcox_up_in_generic | 31847 | 779  | 439 | 30 | 5.39E-07 | 1.53E-05 |
| BERENJENO_TRANSFORMED_BY_RHOA_UP          | wilcox_up_in_generic | 31847 | 536  | 439 | 24 | 5.57E-07 | 1.56E-05 |
| CELL_DEVELOPMENT                          | wilcox_up_in_generic | 31847 | 577  | 439 | 25 | 5.92E-07 | 1.64E-05 |
| ONDER_CDH1_TARGETS_2_DN                   | wilcox_up_in_generic | 31847 | 464  | 439 | 22 | 6.44E-07 | 1.76E-05 |
| REACTOME_ACTIVATED_TLR4_SIGNALLING        | wilcox_up_in_generic | 31847 | 93   | 439 | 10 | 6.52E-07 | 1.76E-05 |
| MTOR_UP.N4.V1_UP                          | wilcox_up_in_generic | 31847 | 196  | 439 | 14 | 6.59E-07 | 1.76E-05 |
| CYTOPLASMIC_PART                          | wilcox_up_in_generic | 31847 | 1383 | 439 | 43 | 6.89E-07 | 1.82E-05 |
| NEGATIVE_REGULATION_OF_DEVELOPMENTAL_PROC | wilcox_up_in_generic | 31847 | 197  | 439 | 14 | 7.00E-07 | 1.83E-05 |
| GNF2_HCK                                  | wilcox_up_in_generic | 31847 | 94   | 439 | 10 | 7.21E-07 | 1.86E-05 |
| COFACTOR_METABOLIC_PROCESS                | wilcox_up_in_generic | 31847 | 54   | 439 | 8  | 7.31E-07 | 1.87E-05 |
| SIGNAL_TRANSDUCTION                       | wilcox_up_in_generic | 31847 | 1634 | 439 | 48 | 7.57E-07 | 1.91E-05 |
| PROGRAMMED_CELL_DEATH                     | wilcox_up_in_generic | 31847 | 432  | 439 | 21 | 7.76E-07 | 1.94E-05 |
