# Supplementary material for: Comparing the Biological Impact of Glatiramer Acetate with the Biological Impact of a Generic
Source: PubMed Central journal article supplement (PMC3885444; doi:10.1371/journal.pone.0083757), 2014-01-08
Supplement: pone.0083757.s015.pdf [file pone.0083757.s015.pdf]

|               |              |           |           |           |           |           |           |             |               |             |             |  |  |  |  |  |  |  |  |
|---------------|--------------|-----------|-----------|-----------|-----------|-----------|-----------|-------------|---------------|-------------|-------------|--|--|--|--|--|--|--|--|
| GPDI1         | ILMN_2991214 | 0.1997722 | 0.178415  | 0.0042358 | 0.9835298 | 0.0176093 | 0.010363  | 5.962863333 | 6.012323684   | 6.011677941 | 6.122713636 |  |  |  |  |  |  |  |  |
| BC018242      | ILMN_2757716 | 0.1034275 | 0.1944064 | 0.0010031 | 0.4484675 | 0.0133763 | 0.0006339 | 6.208366667 | 6.270368421   | 6.249745588 | 6.367659091 |  |  |  |  |  |  |  |  |
| C230090D14    | ILMN_2760468 | 0.1391611 | 0.1359473 | 0.0003776 | 0.7852333 | 0.0077452 | 0.0008987 | 5.947733333 | 5.998884211   | 5.99155     | 6.106377273 |  |  |  |  |  |  |  |  |
| TSPAN31       | ILMN_2964076 | 0.6180744 | 0.5437157 | 0.0117624 | 0.1745861 | 0.0079256 | 0.0001926 | 6.763363333 | 6.787294737   | 6.736430882 | 6.921695455 |  |  |  |  |  |  |  |  |
| POLB          | ILMN_2789425 | 0.21319   | 0.1631492 | 0.0003315 | 0.8404281 | 0.0038193 | 0.009116  | 6.965993333 | 7.0099        | 7.016457353 | 7.124222727 |  |  |  |  |  |  |  |  |
| SIAH1B        | ILMN_2903734 | 0.1289666 | 0.5780849 | 0.0028784 | 0.1912821 | 0.0358219 | 0.0012247 | 6.37228     | 6.436939474   | 6.393475    | 6.528490909 |  |  |  |  |  |  |  |  |
| LOC383036     | ILMN_2536553 | 0.1482323 | 0.0774628 | 0.000893  | 0.9606867 | 0.0431433 | 0.0108233 | 6.41209     | 6.474181579   | 6.472569118 | 6.567927273 |  |  |  |  |  |  |  |  |
| LYNX1         | ILMN_1258942 | 0.4077937 | 0.1416243 | 0.0015633 | 0.4557018 | 0.0014763 | 0.0111326 | 6.817296667 | 6.848018421   | 6.870923529 | 6.972218182 |  |  |  |  |  |  |  |  |
| ZFP41         | ILMN_3137980 | 0.2677737 | 0.8515377 | 0.0002013 | 0.2293824 | 0.0012063 | 7.766E-06 | 7.414063333 | 7.450618421   | 7.419467647 | 7.568736364 |  |  |  |  |  |  |  |  |
| TSPAN33       | ILMN_1219904 | 0.3878386 | 0.0719326 | 0.001134  | 0.3407473 | 0.003853  | 0.0131555 | 6.582713333 | 6.613352632   | 6.641277941 | 6.735368182 |  |  |  |  |  |  |  |  |
| MEGF8         | ILMN_2685985 | 0.0926907 | 0.2228606 | 0.0001841 | 0.2853957 | 0.010053  | 2.972E-05 | 7.129433333 | 7.184897368   | 7.159761765 | 7.281790909 |  |  |  |  |  |  |  |  |
| GPA1          | ILMN_1255423 | 0.8857298 | 0.2373073 | 0.0110271 | 0.1266454 | 0.0022423 | 0.0336273 | 7.391883333 | 7.385360526   | 7.441967647 | 7.544040909 |  |  |  |  |  |  |  |  |
| SLC7A8        | ILMN_2598877 | 0.4887311 | 0.3156157 | 0.0025282 | 0.7614574 | 0.0036332 | 0.0037823 | 6.23386     | 6.259007895   | 6.268110294 | 6.384822727 |  |  |  |  |  |  |  |  |
| RHOF          | ILMN_2992047 | 0.7851793 | 0.0647153 | 0.0010468 | 0.067057  | 0.0001766 | 0.005019  | 9.890486667 | 9.899973684   | 9.947642647 | 10.04121364 |  |  |  |  |  |  |  |  |
| 2810453106RIK | ILMN_2510771 | 0.1564431 | 0.1008447 | 0.0002368 | 0.9907679 | 0.0184046 | 0.0061613 | 8.4568      | 8.506107895   | 8.506408824 | 8.607172727 |  |  |  |  |  |  |  |  |
| PCDHAC1       | ILMN_2980110 | 0.0595308 | 0.2312302 | 0.0003196 | 0.3053608 | 0.0147271 | 0.0005897 | 5.65515     | 5.716521053   | 5.689845588 | 5.804577273 |  |  |  |  |  |  |  |  |
| SCN1B         | ILMN_2834198 | 0.8275725 | 0.9374337 | 0.0010911 | 0.8649437 | 0.0010695 | 0.0004465 | 5.966606667 | 5.975315789   | 5.969526471 | 6.115209091 |  |  |  |  |  |  |  |  |
| CDC42BPB      | ILMN_2867696 | 0.2957513 | 0.9359791 | 0.0007209 | 0.2637103 | 8.89E-06  | 0.0001107 | 7.155186667 | 7.118955263   | 7.152523529 | 7.303131818 |  |  |  |  |  |  |  |  |
| BC037704      | ILMN_2470360 | 0.677388  | 0.7421918 | 0.0001022 | 0.3876608 | 0.0001132 | 1.483E-06 | 7.20203     | 7.214631579   | 7.193013235 | 7.3494      |  |  |  |  |  |  |  |  |
| ADAR          | ILMN_3021272 | 0.0580027 | 0.0512931 | 0.0005744 | 0.9625952 | 0.0334299 | 0.0278485 | 8.79254     | 8.859055263   | 8.857651471 | 8.939627273 |  |  |  |  |  |  |  |  |
| UACA          | ILMN_2492716 | 0.3533152 | 0.1224782 | 0.0003107 | 0.627983  | 0.0021344 | 0.0012063 | 6.05639     | 6.087271053   | 6.099835294 | 6.203304545 |  |  |  |  |  |  |  |  |
| HIST2H2AA1    | ILMN_1228849 | 0.0884511 | 0.1005373 | 0.0004786 | 0.9320942 | 0.0153242 | 0.0150984 | 6.169153333 | 6.226644737   | 6.224104412 | 6.315718182 |  |  |  |  |  |  |  |  |
| PRDX2         | ILMN_2773554 | 0.1385282 | 0.1338746 | 0.0002502 | 0.8935302 | 0.0062484 | 0.0019358 | 11.56810333 | 11.61388947   | 11.61041618 | 11.71427273 |  |  |  |  |  |  |  |  |
| TFRC          | ILMN_2619848 | 0.085162  | 0.0916788 | 0.0022929 | 0.6998758 | 0.016039  | 0.0059977 | 9.730386667 | 9.798923684   | 9.788595588 | 9.876177273 |  |  |  |  |  |  |  |  |
| MTAP15        | ILMN_2657432 | 0.6904967 | 0.2003168 | 0.0006583 | 0.0590439 | 8.877E-05 | 0.0020646 | 8.951766667 | 8.937260526   | 8.991608824 | 9.097072727 |  |  |  |  |  |  |  |  |
| D11WSU47E     | ILMN_2700833 | 0.225963  | 0.1430469 | 0.000121  | 0.8628336 | 0.0036318 | 0.0031777 | 7.024173333 | 7.063092105   | 7.067933824 | 7.168595455 |  |  |  |  |  |  |  |  |
| ADPRHL2       | ILMN_2639063 | 0.6840518 | 0.3473478 | 0.0053945 | 0.1186338 | 0.0008991 | 0.0054003 | 6.74877     | 6.730905263   | 6.782579412 | 6.892372727 |  |  |  |  |  |  |  |  |
| SYMPK         | ILMN_1245437 | 0.7197743 | 0.5936817 | 0.0010108 | 0.891984  | 0.0060061 | 0.002917  | 8.383586667 | 8.397528947   | 8.402226471 | 8.52715     |  |  |  |  |  |  |  |  |
| GYPA          | ILMN_2696696 | 0.7389014 | 0.3632769 | 0.0251901 | 0.4987125 | 0.0031931 | 0.0003548 | 6.934123333 | 6.9204        | 6.897686765 | 7.0776      |  |  |  |  |  |  |  |  |
| KLHDC3        | ILMN_2851023 | 0.783022  | 0.2437231 | 0.0037638 | 0.269885  | 0.0004288 | 0.0080675 | 7.81348     | 7.822594737   | 7.853058824 | 7.955713636 |  |  |  |  |  |  |  |  |
| 3110070M22RIK | ILMN_2696066 | 0.1073796 | 0.2050209 | 0.0014511 | 0.4866036 | 0.0398205 | 0.0035237 | 6.120523333 | 6.180081579   | 6.160217647 | 6.262866364 |  |  |  |  |  |  |  |  |
| TRUB1         | ILMN_1240735 | 0.2953657 | 0.0734389 | 9.239E-05 | 0.5610317 | 0.0008692 | 0.0006353 | 8.182053333 | 8.2163        | 8.230364706 | 8.323472727 |  |  |  |  |  |  |  |  |
| AKT2          | ILMN_2655895 | 0.8442971 | 0.2577229 | 4.546E-05 | 0.3437085 | 4.35E-05  | 1.532E-07 | 5.950246667 | 5.944173684   | 5.919175    | 6.091436364 |  |  |  |  |  |  |  |  |
| RSC1A1        | ILMN_1230668 | 0.6840115 | 0.0539208 | 0.0004297 | 0.0858665 | 0.0001366 | 0.0020164 | 7.647993333 | 7.659592105   | 7.697304412 | 7.787868182 |  |  |  |  |  |  |  |  |
| FRY           | ILMN_2623288 | 0.4184333 | 0.1716296 | 0.0008519 | 0.5808814 | 0.0035019 | 0.005631  | 5.699756667 | 5.725107895   | 5.740185294 | 5.839477273 |  |  |  |  |  |  |  |  |
| TJAP1         | ILMN_2934448 | 0.4648067 | 0.4800185 | 0.0005054 | 0.1039589 | 0.0031371 | 7.38E-06  | 8.189586667 | 8.215047368   | 8.167745588 | 8.328781818 |  |  |  |  |  |  |  |  |
| CNGA4         | ILMN_2875896 | 0.4128026 | 0.838024  | 0.0042111 | 0.4856524 | 0.0262685 | 0.0031015 | 5.99744     | 6.028623684   | 6.004719118 | 6.136186364 |  |  |  |  |  |  |  |  |
| SGSM3         | ILMN_2987294 | 0.2852907 | 0.1799385 | 0.000553  | 0.8524482 | 0.0023816 | 0.0020158 | 7.17779     | 7.212339474   | 7.217123529 | 7.316372727 |  |  |  |  |  |  |  |  |
| 9430078K10RIK | ILMN_2500041 | 0.5504554 | 0.1164212 | 0.0017546 | 0.3083079 | 0.0041732 | 0.0165627 | 6.076453333 | 6.095631579   | 6.124530882 | 6.214954545 |  |  |  |  |  |  |  |  |
| SLC26A6       | ILMN_2668261 | 0.3512318 | 0.3748397 | 0.0020554 | 0.9305283 | 0.0138219 | 0.0112631 | 6.420846667 | 6.4567        | 6.453741176 | 6.5591      |  |  |  |  |  |  |  |  |
| LYSMD4        | ILMN_2701435 | 0.3263893 | 0.7070625 | 0.0012552 | 0.3678655 | 0.0028218 | 6.468E-05 | 6.801406667 | 6.835131579   | 6.812473529 | 6.939245455 |  |  |  |  |  |  |  |  |
| PCBD2         | ILMN_2876775 | 0.838579  | 0.0685734 | 0.0009368 | 0.0565928 | 7.067E-05 | 0.0052888 | 10.26506    | 10.27223684   | 10.32058088 | 10.40271364 |  |  |  |  |  |  |  |  |
| UAP1          | ILMN_2502542 | 0.2165725 | 0.9854187 | 0.0009075 | 0.1340454 | 0.0318819 | 0.0002473 | 8.167053333 | 8.216581579   | 8.167673529 | 8.304695455 |  |  |  |  |  |  |  |  |
| RNF40         | ILMN_1242623 | 0.211788  | 0.099174  | 0.0001084 | 0.6579531 | 0.0001075 | 0.0007106 | 6.104593333 | 6.138042105   | 6.147527941 | 6.241636364 |  |  |  |  |  |  |  |  |
| LOC277049     | ILMN_1240399 | 0.2934571 | 0.1060159 | 0.0003221 | 0.5755921 | 0.0029932 | 0.005663  | 5.871153333 | 5.901181579   | 5.915414706 | 6.006836364 |  |  |  |  |  |  |  |  |
| LOC100047603  | ILMN_2697057 | 0.5317771 | 0.4972328 | 0.0027997 | 0.9033529 | 0.0040861 | 0.000286  | 6.163923333 | 6.187207895   | 6.184048529 | 6.299472727 |  |  |  |  |  |  |  |  |
| BCL2L12       | ILMN_2935909 | 0.4501663 | 0.1507583 | 0.0008312 | 0.5408152 | 0.0049174 | 0.0069966 | 6.95393     | 6.980221053   | 6.997483824 | 7.088572727 |  |  |  |  |  |  |  |  |
| HMGCL         | ILMN_1256234 | 0.2979737 | 0.3874272 | 0.0028899 | 0.8735481 | 0.0135305 | 0.0202339 | 7.923806667 | 7.963534211   | 7.958       | 8.0583      |  |  |  |  |  |  |  |  |
| TRPV4         | ILMN_2466284 | 0.2514505 | 0.3380365 | 0.0003131 | 0.6827345 | 0.0188364 | 0.002112  | 5.866016667 | 5.907376316   | 5.895151471 | 5.999986364 |  |  |  |  |  |  |  |  |
| 9030624J02RIK | ILMN_2872639 | 0.782004  | 0.4170399 | 0.0001144 | 0.603075  | 0.0003567 | 0.0003189 | 9.494316667 | 9.503005263   | 9.516620588 | 9.627690909 |  |  |  |  |  |  |  |  |
| 1110020P15RIK | ILMN_3142224 | 0.1212065 | 0.0502281 | 3.997E-06 | 0.9858039 | 0.0010157 | 5.228E-05 | 12.83764667 | 12.8778       | 12.87814853 | 12.97065    |  |  |  |  |  |  |  |  |
| SNCA          | ILMN_3059393 | 0.2626604 | 0.2088617 | 4.536E-05 | 0.8934317 | 0.0030156 | 0.0039725 | 5.838986667 | 5.871242105   | 5.874923529 | 5.971345455 |  |  |  |  |  |  |  |  |
| 9130011J15RIK | ILMN_2593484 | 0.2364945 | 0.4354212 | 0.0007902 | 0.4843251 | 0.0049498 | 0.0001633 | 8.423743333 | 8.460226316   | 8.444064706 | 8.556095455 |  |  |  |  |  |  |  |  |
| ATPB9         | ILMN_1233770 | 0.8250675 | 0.1176255 | 0.0007899 | 0.1465289 | 0.0004474 | 0.0031797 | 5.876853333 | 5.884023684   | 5.920125    | 6.008981818 |  |  |  |  |  |  |  |  |
| KCNC3         | ILMN_2681742 | 0.372855  | 0.7150701 | 0.0018064 | 0.4859011 | 0.0082036 | 0.0005546 | 5.950906667 | 5.980818421   | 5.961808824 | 6.082136364 |  |  |  |  |  |  |  |  |
| LOC100045460  | ILMN_1216433 | 0.5101012 | 0.3577678 | 0.0010288 | 0.0673625 | 3.894E-05 | 0.0009365 | 5.620116667 | 5.600318421   | 5.645004412 | 5.749863636 |  |  |  |  |  |  |  |  |
| MAGEE2        | ILMN_2477690 | 0.1710845 | 0.05934   | 0.0011835 | 0.6011098 | 0.007276  | 0.0102496 | 5.760393333 | 5.796631579   | 5.808379412 | 5.889972727 |  |  |  |  |  |  |  |  |
| LOC100047194  | ILMN_1217481 | 0.1593328 | 0.0981729 | 1.405E-05 | 0.9398443 | 0.0118878 | 0.0069427 | 5.874716667 | 5.918439474   | 5.920526471 | 6.00425     |  |  |  |  |  |  |  |  |
| MS4A7         | ILMN_3091003 | 0.5729752 | 0.4820176 | 0.0137711 | 0.8972357 | 0.0231728 | 0.0210323 | 6.47951     | 6.501352632   | 6.505692647 | 6.608881818 |  |  |  |  |  |  |  |  |
| EFCAB6        | ILMN_2928498 | 0.7632342 | 0.3221721 | 0.0043956 | 0.4863548 | 0.0034302 | 0.002517  | 5.580346667 | 5.591255263</ |             |             |  |  |  |  |  |  |  |  |

|               |              |           |           |           |           |           |           |             |             |             |             |  |  |  |  |  |  |  |  |
|---------------|--------------|-----------|-----------|-----------|-----------|-----------|-----------|-------------|-------------|-------------|-------------|--|--|--|--|--|--|--|--|
| CEBPE         | ILMN_3029849 | 0.8078374 | 0.1732849 | 0.0030771 | 0.2318701 | 0.002828  | 0.0162265 | 6.161636667 | 6.170128947 | 6.20425     | 6.289590909 |  |  |  |  |  |  |  |  |
| LOC100046781  | ILMN_1249142 | 0.6583194 | 0.8334352 | 0.0014968 | 0.468952  | 0.0038563 | 0.0003991 | 6.09563     | 6.110731579 | 6.088780882 | 6.223009091 |  |  |  |  |  |  |  |  |
| C920004C08RIK | ILMN_1222071 | 0.3850288 | 0.0700544 | 0.0038178 | 0.3880992 | 0.0125303 | 0.0225901 | 11.32737    | 11.35911842 | 11.38204412 | 11.45473636 |  |  |  |  |  |  |  |  |
| TNXB          | ILMN_2444411 | 0.1496148 | 0.1054688 | 0.0005018 | 0.8805468 | 0.002138  | 0.0019133 | 5.663876667 | 5.699578947 | 5.702611765 | 5.790745455 |  |  |  |  |  |  |  |  |
| ADAL          | ILMN_2948663 | 0.2369654 | 0.1716393 | 0.0033817 | 0.9717648 | 0.0463896 | 0.0180219 | 6.324213333 | 6.367818421 | 6.366766176 | 6.450545455 |  |  |  |  |  |  |  |  |
| INTS7         | ILMN_2726174 | 0.2732407 | 0.586879  | 0.0058704 | 0.4179798 | 0.0040954 | 0.0010741 | 9.293426667 | 9.331626316 | 9.311188235 | 9.41915     |  |  |  |  |  |  |  |  |
| FOXP4         | ILMN_2650317 | 0.7459436 | 0.5627063 | 0.0170549 | 0.7551376 | 0.0023531 | 0.005287  | 6.264146667 | 6.276007895 | 6.284380882 | 6.389745455 |  |  |  |  |  |  |  |  |
| Ageneric5L    | ILMN_1217612 | 0.8329932 | 0.9146392 | 0.0004805 | 0.6953516 | 3.709E-05 | 1.483E-05 | 8.109116667 | 8.115305263 | 8.106152941 | 8.234490909 |  |  |  |  |  |  |  |  |
| CD44          | ILMN_2474229 | 0.2692964 | 0.1478198 | 0.0055493 | 0.9255312 | 0.044715  | 0.0173939 | 5.908876667 | 5.950365789 | 5.953       | 6.034186364 |  |  |  |  |  |  |  |  |
| ZMAT3         | ILMN_2418426 | 0.2565844 | 0.8631643 | 0.0022322 | 0.0994823 | 0.026959  | 8.304E-05 | 7.620363333 | 7.659939474 | 7.615426471 | 7.745318182 |  |  |  |  |  |  |  |  |
| PRPF3         | ILMN_2941431 | 0.480392  | 0.0666872 | 0.0019168 | 0.1846098 | 0.0003537 | 0.0072291 | 9.9884      | 10.01081053 | 10.04008088 | 10.11331818 |  |  |  |  |  |  |  |  |
| RPUSD3        | ILMN_1214740 | 0.2304027 | 0.2327958 | 0.0025548 | 0.8325719 | 0.0169034 | 0.004917  | 6.720803333 | 6.761342105 | 6.755892647 | 6.845586364 |  |  |  |  |  |  |  |  |
| ZBTB6         | ILMN_2525819 | 0.1308718 | 0.1225869 | 0.001417  | 0.6993416 | 0.0195411 | 0.0014442 | 5.991976667 | 6.036765789 | 6.028576471 | 6.116695455 |  |  |  |  |  |  |  |  |
| MAGEA9        | ILMN_1252512 | 0.8309473 | 0.0845974 | 0.0006887 | 0.1188421 | 0.0013866 | 0.0180155 | 5.76786     | 5.7748      | 5.817098529 | 5.892554545 |  |  |  |  |  |  |  |  |
| PTPRF         | ILMN_1219189 | 0.2190425 | 0.0867244 | 0.0005635 | 0.5640646 | 0.0042956 | 0.0157663 | 5.6626      | 5.695144737 | 5.709207353 | 5.786977273 |  |  |  |  |  |  |  |  |
| NSF           | ILMN_2760629 | 0.1931859 | 0.360736  | 0.0008575 | 0.5595835 | 0.0051887 | 0.0009574 | 9.924636667 | 9.963881579 | 9.949961765 | 10.04892273 |  |  |  |  |  |  |  |  |
| SARDH         | ILMN_2903455 | 0.7960502 | 0.7785859 | 0.0101605 | 0.51361   | 0.0013035 | 0.0028363 | 5.826933333 | 5.817136842 | 5.836519118 | 5.949331818 |  |  |  |  |  |  |  |  |
| XPO5          | ILMN_1216198 | 0.7050569 | 0.679202  | 0.0238434 | 0.3306391 | 0.042049  | 0.0055737 | 7.6071      | 7.625202632 | 7.592019118 | 7.729186364 |  |  |  |  |  |  |  |  |
| VGLL2         | ILMN_2495753 | 0.3493614 | 0.2615197 | 0.0061246 | 0.8419134 | 0.0101935 | 0.024173  | 5.813743333 | 5.846973684 | 5.852779412 | 5.935795455 |  |  |  |  |  |  |  |  |
| HSD3B2        | ILMN_1233611 | 0.3857508 | 0.8465226 | 0.0001419 | 0.1997045 | 0.0047757 | 4.855E-06 | 5.780146667 | 5.805763158 | 5.775658824 | 5.9017      |  |  |  |  |  |  |  |  |
| CAPZB         | ILMN_1230100 | 0.1875435 | 0.0603499 | 0.0021735 | 0.6758285 | 0.0277333 | 0.0323886 | 5.8003      | 5.843094737 | 5.853869118 | 5.921709091 |  |  |  |  |  |  |  |  |
| PKIB          | ILMN_3052870 | 0.7009613 | 0.2792825 | 0.0002337 | 0.4501659 | 0.0004146 | 0.0035889 | 5.772683333 | 5.783521053 | 5.802783824 | 5.894004545 |  |  |  |  |  |  |  |  |
| A230005A19RIK | ILMN_2564767 | 0.6380251 | 0.1891714 | 2.648E-05 | 0.0553869 | 1.159E-05 | 8.044E-05 | 5.803403333 | 5.79155     | 5.830422059 | 5.924704545 |  |  |  |  |  |  |  |  |
| USP10         | ILMN_1217931 | 0.7946592 | 0.8388046 | 0.0096273 | 0.934     | 0.0095534 | 0.0064299 | 6.42393     | 6.434371053 | 6.431577941 | 6.544827273 |  |  |  |  |  |  |  |  |
| NCND          | ILMN_1231405 | 0.8169843 | 0.416902  | 0.0066776 | 0.2035153 | 0.0002209 | 0.0077846 | 8.381273333 | 8.373278947 | 8.408173529 | 8.501877273 |  |  |  |  |  |  |  |  |
| SYN1          | ILMN_1235133 | 0.6694849 | 0.2578995 | 0.0045018 | 0.0779335 | 0.0008223 | 0.0099512 | 5.950843333 | 5.935671053 | 5.984697059 | 6.071295455 |  |  |  |  |  |  |  |  |
| ARVCF         | ILMN_2573293 | 0.4469461 | 0.7566684 | 0.0010282 | 0.6294586 | 0.003341  | 0.0008631 | 5.718253333 | 5.738763158 | 5.726697059 | 5.838531818 |  |  |  |  |  |  |  |  |
| SMG7          | ILMN_2953017 | 0.4258797 | 0.3806893 | 0.0188944 | 0.9166145 | 0.0218454 | 0.0080269 | 9.624156667 | 9.658326316 | 9.655355882 | 9.744204545 |  |  |  |  |  |  |  |  |
| 5730472N09RIK | ILMN_2765936 | 0.4083926 | 0.6082371 | 0.0019425 | 0.6700575 | 0.0125348 | 0.0017913 | 7.63479     | 7.660244737 | 7.648992647 | 7.754604545 |  |  |  |  |  |  |  |  |
| ZMIZ1         | ILMN_1224736 | 0.3763442 | 0.055049  | 0.0136689 | 0.3984977 | 0.0022425 | 9.798E-06 | 7.174863333 | 7.131644737 | 7.099030882 | 7.294513636 |  |  |  |  |  |  |  |  |
| ZFP162        | ILMN_1215244 | 0.2014047 | 0.7434902 | 0.003566  | 0.2275352 | 1.516E-05 | 0.0001463 | 7.66155     | 7.620365789 | 7.651876471 | 7.781118182 |  |  |  |  |  |  |  |  |
| DUS2L         | ILMN_1256843 | 0.8561644 | 0.446428  | 0.0038192 | 0.2785569 | 0.0008641 | 0.0017291 | 6.93203     | 6.926063158 | 6.953073529 | 7.050854545 |  |  |  |  |  |  |  |  |
| BZRP1         | ILMN_2635718 | 0.6185068 | 0.574723  | 0.0190054 | 0.9031811 | 0.0430169 | 0.0044684 | 6.187326667 | 6.206431579 | 6.203076471 | 6.306068182 |  |  |  |  |  |  |  |  |
| ARFGAP2       | ILMN_2853409 | 0.8237825 | 0.8515888 | 0.001996  | 0.9447898 | 0.0067887 | 0.00413   | 9.42326     | 9.430544737 | 9.428569118 | 9.541945455 |  |  |  |  |  |  |  |  |
| 9330183F02RIK | ILMN_2558866 | 0.3261468 | 0.1733477 | 0.0005571 | 0.6332639 | 0.0058003 | 0.0168183 | 5.949093333 | 5.973960526 | 5.98625     | 6.067668182 |  |  |  |  |  |  |  |  |
| DBF4          | ILMN_2952661 | 0.6240393 | 0.8384865 | 0.0122907 | 0.3985923 | 0.0191309 | 0.0016656 | 8.57731     | 8.598042105 | 8.569597059 | 8.695836364 |  |  |  |  |  |  |  |  |
| ATG3          | ILMN_2595188 | 0.6213315 | 0.9031596 | 0.0084176 | 0.5772204 | 0.0012036 | 0.0002088 | 5.596373333 | 5.578073684 | 5.592863235 | 5.714631818 |  |  |  |  |  |  |  |  |
| ISCA1         | ILMN_2888842 | 0.3595758 | 0.7809579 | 0.0076209 | 0.4365809 | 0.0372539 | 0.0050363 | 9.365886207 | 9.401326316 | 9.377892647 | 9.484090909 |  |  |  |  |  |  |  |  |
| 4930544L04RIK | ILMN_1256258 | 0.1212117 | 0.1444176 | 0.0006835 | 0.7308269 | 0.0319887 | 0.0066889 | 5.835473333 | 5.881492105 | 5.873111765 | 5.953290909 |  |  |  |  |  |  |  |  |
| 2610209A20RIK | ILMN_2744228 | 0.222251  | 0.0503501 | 0.0038665 | 0.6307725 | 0.0388641 | 0.030015  | 5.954303333 | 5.9957      | 6.007576471 | 6.072068182 |  |  |  |  |  |  |  |  |
| 2810046M22RIK | ILMN_2714278 | 0.7932571 | 0.3413647 | 0.0069021 | 0.4306555 | 0.0021317 | 0.0072284 | 5.965796667 | 5.974528947 | 5.994625    | 6.08355     |  |  |  |  |  |  |  |  |
| DHDH          | ILMN_1234086 | 0.7472445 | 0.5905975 | 0.0017523 | 0.8697156 | 0.0002079 | 4.284E-06 | 7.466183333 | 7.457073684 | 7.453639706 | 7.583509091 |  |  |  |  |  |  |  |  |
| ALOX15        | ILMN_2789023 | 0.4945088 | 0.5363894 | 0.005707  | 0.910931  | 0.0080107 | 0.005256  | 5.948553333 | 5.970678947 | 5.967667647 | 6.065718182 |  |  |  |  |  |  |  |  |
| RNF183        | ILMN_2753931 | 0.2692191 | 0.1884299 | 0.0068692 | 0.88654   | 0.0201168 | 0.0253897 | 5.951953333 | 5.990247368 | 5.994061765 | 6.069068182 |  |  |  |  |  |  |  |  |
| LOC385989     | ILMN_2538010 | 0.186073  | 0.2002142 | 0.0019194 | 0.7581627 | 0.0262803 | 0.0047078 | 5.9626      | 6.003389474 | 5.996039706 | 6.079709091 |  |  |  |  |  |  |  |  |
| RBPM5         | ILMN_3026557 | 0.9676317 | 0.5622495 | 0.0034885 | 0.5434605 | 0.0007213 | 8.217E-06 | 6.082373333 | 6.081173684 | 6.068086765 | 6.199422727 |  |  |  |  |  |  |  |  |
| MTRR          | ILMN_2969314 | 0.138014  | 0.2808236 | 0.0027479 | 0.4487716 | 0.0454004 | 0.0033295 | 6.4451      | 6.491657895 | 6.473463235 | 6.562140909 |  |  |  |  |  |  |  |  |
| 5930400G23RIK | ILMN_1252245 | 0.4046753 | 0.4652826 | 0.0034776 | 0.8465238 | 0.0314305 | 0.0114345 | 5.852196667 | 5.880894737 | 5.875044118 | 5.968995455 |  |  |  |  |  |  |  |  |
| CD151         | ILMN_2492403 | 0.9211922 | 0.6734808 | 0.0126171 | 0.5508714 | 0.0052828 | 0.0014538 | 7.20143     | 7.205263158 | 7.185635294 | 7.318127273 |  |  |  |  |  |  |  |  |
| LOC380636     | ILMN_2533773 | 0.1214529 | 0.0880914 | 0.0005543 | 0.9948424 | 0.0233225 | 0.0116027 | 5.523523333 | 5.565797368 | 5.565647059 | 5.639413636 |  |  |  |  |  |  |  |  |
| ITFG2         | ILMN_1252621 | 0.7616105 | 0.4091743 | 0.0012221 | 0.1959224 | 0.0002063 | 0.0008307 | 8.126836667 | 8.117552632 | 8.148073529 | 8.242622727 |  |  |  |  |  |  |  |  |
| PALM          | ILMN_2815626 | 0.2721038 | 0.6017592 | 0.0070254 | 0.0526414 | 9.931E-05 | 0.0046269 | 6.404466667 | 6.3666      | 6.420661765 | 6.519804545 |  |  |  |  |  |  |  |  |
| ZFP563        | ILMN_2642938 | 0.193144  | 0.3057901 | 0.0038908 | 0.6058345 | 0.0392958 | 0.0064416 | 5.780793333 | 5.821705263 | 5.808876471 | 5.894754545 |  |  |  |  |  |  |  |  |
| LOC382813     | ILMN_1237743 | 0.3244602 | 0.1328203 | 0.0011393 | 0.6695764 | 6.759E-05 | 1.98E-06  | 5.826046667 | 5.796476316 | 5.785617647 | 5.939763636 |  |  |  |  |  |  |  |  |
| BC017612      | ILMN_2631514 | 0.8355212 | 0.8501323 | 0.0180931 | 0.6600593 | 0.0099305 | 0.0082377 | 7.401256667 | 7.409202632 | 7.393575    | 7.514886364 |  |  |  |  |  |  |  |  |
| CBARA1        | ILMN_2686513 | 0.8613971 | 0.9466614 | 0.0179951 | 0.8857374 | 0.0071062 | 0.0037732 | 7.51929     | 7.512352632 | 7.516942647 | 7.632227273 |  |  |  |  |  |  |  |  |
| COQ9          | ILMN_2774456 | 0.5907585 | 0.1375329 | 0.0008612 | 0.3490039 | 0.0062178 | 0.027967  | 8.24214     | 8.258726316 | 8.284261765 | 8.355045455 |  |  |  |  |  |  |  |  |
| USP36         | ILMN_2491232 | 0.5694926 | 0.3860962 | 0.0302749 | 0.0731112 | 0.0419255 | 0.0001784 | 8.529063333 | 8.552176316 | 8.49982353  | 8.641940909 |  |  |  |  |  |  |  |  |
| 1700063H04RIK | ILMN_1244141 | 0.6351553 | 0.1080972 | 0.0089017 | 0.2270816 | 0.0088517 | 0.0343723 | 5.77347     | 5.789544737 | 5.819770588 | 5.886254545 |  |  |  |  |  |  |  |  |
| JPH1          | ILMN_1217728 | 0.3436531 | 0.0971616 | 0.0031993 | 0.5357723 | 0.0137897 | 0.0215332 | 5.62534     | 5.656123684 | 5.671236765 |             |  |  |  |  |  |  |  |  |



|                  |              |           |           |           |           |           |           |              |             |             |             |  |  |  |  |  |  |  |  |
|------------------|--------------|-----------|-----------|-----------|-----------|-----------|-----------|--------------|-------------|-------------|-------------|--|--|--|--|--|--|--|--|
| CTNNA3           | ILMN_2834525 | 0.3536454 | 0.3754631 | 0.0119809 | 0.8661483 | 0.0305254 | 0.0104644 | 5.677696667  | 5.704381579 | 5.700572059 | 5.780836364 |  |  |  |  |  |  |  |  |
| 9430003J03RIK    | ILMN_1258022 | 0.6557114 | 0.28191   | 0.0019528 | 0.4896149 | 0.0018663 | 0.0071396 | 6.223606667  | 6.235028947 | 6.250230882 | 6.326727273 |  |  |  |  |  |  |  |  |
| NAPRT1           | ILMN_2799590 | 0.9601419 | 0.3307608 | 0.0079905 | 0.2665183 | 0.006164  | 0.0003234 | 6.49092      | 6.492510526 | 6.460433824 | 6.593895455 |  |  |  |  |  |  |  |  |
| SYNGR1           | ILMN_3101732 | 0.9391257 | 0.3508257 | 0.009843  | 0.3004176 | 0.0132862 | 0.0303686 | 5.925626667  | 5.922781579 | 5.953997059 | 6.028540909 |  |  |  |  |  |  |  |  |
| LOC380723        | ILMN_1243160 | 0.3774093 | 0.6761875 | 0.0014385 | 0.516955  | 0.0077931 | 0.0002965 | 5.8033       | 5.824481579 | 5.811860294 | 5.906168182 |  |  |  |  |  |  |  |  |
| D130017N08RIK    | ILMN_1247385 | 0.1666711 | 0.4830741 | 0.0101915 | 0.4217883 | 0.0440035 | 0.0140436 | 6.040376667  | 6.081463158 | 6.061413235 | 6.142936364 |  |  |  |  |  |  |  |  |
| LOC677528        | ILMN_2656362 | 0.4798284 | 0.945782  | 0.0071564 | 0.4145076 | 0.0002681 | 0.0010366 | 9.500013333  | 9.476392105 | 9.497989706 | 9.602481818 |  |  |  |  |  |  |  |  |
| BCL2L2           | ILMN_2551387 | 0.2281858 | 0.2152442 | 0.0047362 | 0.9737233 | 0.0130062 | 0.0159752 | 5.758356667  | 5.792813158 | 5.792060294 | 5.86055     |  |  |  |  |  |  |  |  |
| ZEB2             | ILMN_1227793 | 0.6576569 | 0.5718117 | 0.0004937 | 0.9218797 | 0.0019558 | 0.0010995 | 5.58955      | 5.600247368 | 5.602375    | 5.691709091 |  |  |  |  |  |  |  |  |
| UBE2A            | ILMN_2476804 | 0.8177897 | 0.9500046 | 0.0174358 | 0.7405797 | 0.0172227 | 0.0118181 | 7.649666667  | 7.640873684 | 7.651729412 | 7.751495455 |  |  |  |  |  |  |  |  |
| BC040758         | ILMN_3034303 | 0.2893187 | 0.3769258 | 0.005221  | 0.7981817 | 0.037212  | 0.0192599 | 6.051266667  | 6.083378947 | 6.076677941 | 6.153059091 |  |  |  |  |  |  |  |  |
| FOX1             | ILMN_3163279 | 0.8430818 | 0.9489308 | 0.0179908 | 0.7493004 | 0.0116943 | 0.0050916 | 5.774953333  | 5.767334211 | 5.776966176 | 5.876681818 |  |  |  |  |  |  |  |  |
| BCKDK            | ILMN_1249301 | 0.2175888 | 0.9222956 | 0.0155004 | 0.1187378 | 8.623E-05 | 0.0058096 | 9.482256667  | 9.443044737 | 9.485333824 | 9.583913636 |  |  |  |  |  |  |  |  |
| TRIM15           | ILMN_1246816 | 0.6897495 | 0.1295912 | 0.0020197 | 0.2301412 | 0.0022952 | 0.0177117 | 5.583353333  | 5.593910526 | 5.620164706 | 5.684890909 |  |  |  |  |  |  |  |  |
| HOXC10           | ILMN_2836885 | 0.8983767 | 0.7071051 | 0.0314001 | 0.5904321 | 0.0430888 | 0.0058908 | 6.14456      | 6.149455263 | 6.131916176 | 6.246045455 |  |  |  |  |  |  |  |  |
| NFKB1            | ILMN_2592476 | 0.7689871 | 0.9504177 | 0.0029537 | 0.6379058 | 0.0079048 | 6.316E-05 | 11.572606667 | 11.58177368 | 11.57118529 | 11.67374091 |  |  |  |  |  |  |  |  |
| OLFR228          | ILMN_2818216 | 0.2773733 | 0.6197379 | 0.0024911 | 0.0611951 | 6.157E-05 | 0.0029144 | 5.64159      | 5.606563158 | 5.655326471 | 5.742690909 |  |  |  |  |  |  |  |  |
| CLCN1            | ILMN_2802672 | 0.4944629 | 0.9550135 | 0.0048403 | 0.4679323 | 0.0412931 | 0.0034553 | 5.78522      | 5.807239474 | 5.786810294 | 5.886245455 |  |  |  |  |  |  |  |  |
| 6330579M01RIK    | ILMN_1256365 | 0.375962  | 0.8389799 | 0.0018333 | 0.2222726 | 0.0075945 | 0.0001729 | 5.81892      | 5.839239474 | 5.814498529 | 5.919422727 |  |  |  |  |  |  |  |  |
| SFRS2IP          | ILMN_2713448 | 0.7374842 | 0.4155913 | 0.0163379 | 0.1530212 | 0.0073823 | 7.545E-05 | 9.258286667  | 9.270178947 | 9.233055882 | 9.358495455 |  |  |  |  |  |  |  |  |
| 4930543G11RIK    | ILMN_1233640 | 0.8229463 | 0.6641014 | 0.0021213 | 0.4370222 | 0.0015111 | 1.198E-05 | 5.784193333  | 5.78985263  | 5.775158824 | 5.88425     |  |  |  |  |  |  |  |  |
| 2900090M10RIK    | ILMN_1260170 | 0.2843888 | 0.1051492 | 0.0006685 | 0.7017619 | 0.0214413 | 0.0209832 | 5.65543      | 5.685610526 | 5.694514706 | 5.755240909 |  |  |  |  |  |  |  |  |
| LOC100048331     | ILMN_1242041 | 0.5890128 | 0.8478217 | 0.0260322 | 0.3738719 | 0.029814  | 0.0038906 | 5.8999       | 5.918623684 | 5.893625    | 5.999568182 |  |  |  |  |  |  |  |  |
| TFIP11           | ILMN_2661666 | 0.9021335 | 0.1601949 | 0.0059321 | 0.0744788 | 0.0006418 | 0.042188  | 8.054953333  | 8.051084211 | 8.095283824 | 8.154390909 |  |  |  |  |  |  |  |  |
| TTC4             | ILMN_1220820 | 0.5058343 | 0.9987373 | 0.0157986 | 0.4538196 | 0.0009629 | 0.0059389 | 8.308693333  | 8.288452632 | 8.308645588 | 8.408109091 |  |  |  |  |  |  |  |  |
| CAMK1            | ILMN_2944939 | 0.1046081 | 0.1579896 | 0.0245902 | 0.5280152 | 5.12E-05  | 1.848E-05 | 6.459003333  | 6.399568421 | 6.416069118 | 6.557886364 |  |  |  |  |  |  |  |  |
| 2600005J22RIK    | ILMN_1246515 | 0.8404354 | 0.1647097 | 0.0093088 | 0.1506204 | 0.0012756 | 0.0457951 | 5.692316667  | 5.698397368 | 5.732252941 | 5.790959091 |  |  |  |  |  |  |  |  |
| PSCD2            | ILMN_1251874 | 0.3499468 | 0.4129054 | 0.0056646 | 0.7717056 | 0.0009164 | 0.0001789 | 6.155033333  | 6.126615789 | 6.134001471 | 6.253527273 |  |  |  |  |  |  |  |  |
| control_ILMN_137 | ILMN_1378911 | 0.3266769 | 0.4247131 | 0.0042881 | 0.8607028 | 0.0134591 | 0.0075772 | 5.681283333  | 5.703731579 | 5.700030882 | 5.779386364 |  |  |  |  |  |  |  |  |
| F830116E18RIK    | ILMN_2905525 | 0.4896761 | 0.3190837 | 0.0167845 | 0.9051036 | 0.009933  | 0.0007604 | 5.922473333  | 5.896713158 | 5.892973529 | 6.020572727 |  |  |  |  |  |  |  |  |
| ATPBD3           | ILMN_2783557 | 0.7558553 | 0.8869908 | 0.0168345 | 0.8187708 | 0.0274611 | 0.0027203 | 6.565073333  | 6.575857895 | 6.569377941 | 6.663122727 |  |  |  |  |  |  |  |  |
| SLC22A21         | ILMN_1234533 | 0.1702699 | 0.8254046 | 0.0092515 | 0.0945147 | 0.0370609 | 0.0005133 | 5.769        | 5.808589474 | 5.774551471 | 5.867009091 |  |  |  |  |  |  |  |  |
| FBXL15           | ILMN_2792047 | 0.4234882 | 0.5212452 | 0.0145001 | 0.8581854 | 0.0008434 | 0.0015336 | 7.304583333  | 7.278686842 | 7.283870588 | 7.402495455 |  |  |  |  |  |  |  |  |
| 4930481A15RIK    | ILMN_1248737 | 0.6128947 | 0.6812972 | 0.0065184 | 0.8872365 | 0.0042368 | 0.0033059 | 5.86779      | 5.882173684 | 5.878910294 | 5.965627273 |  |  |  |  |  |  |  |  |
| E030016N13RIK    | ILMN_1235317 | 0.7352544 | 0.3676594 | 0.0179538 | 0.5831603 | 0.0100781 | 0.001144  | 6.23018      | 6.217034211 | 6.198725    | 6.328004545 |  |  |  |  |  |  |  |  |
| PDGFB            | ILMN_2618714 | 0.9502168 | 0.6373694 | 0.0146617 | 0.6615403 | 0.0091513 | 0.0067522 | 6.229823333  | 6.231968421 | 6.243358824 | 6.327645455 |  |  |  |  |  |  |  |  |
| 4933437N03RIK    | ILMN_2774580 | 0.5990406 | 0.4084001 | 0.0399537 | 0.7236668 | 0.0224403 | 0.0412527 | 6.072506667  | 6.089789474 | 6.098586765 | 6.169759091 |  |  |  |  |  |  |  |  |
| 2310046A06RIK    | ILMN_2700344 | 0.0969343 | 0.3378204 | 0.0036116 | 0.4052594 | 9.837E-06 | 0.005952  | 5.654603333  | 5.617594737 | 5.633589706 | 5.7515      |  |  |  |  |  |  |  |  |
| MAK10            | ILMN_2828599 | 0.5752463 | 0.9983123 | 0.0046274 | 0.4325795 | 3.775E-05 | 8.271E-05 | 9.515693333  | 9.500657895 | 9.515651471 | 9.612581818 |  |  |  |  |  |  |  |  |
| LOC277236        | ILMN_2530354 | 0.7457257 | 0.6674914 | 0.0050773 | 0.9777173 | 0.0168366 | 0.0030544 | 5.9668       | 5.976176316 | 5.976830882 | 6.063481818 |  |  |  |  |  |  |  |  |
| TMEM43           | ILMN_2700505 | 0.0835943 | 0.0626718 | 0.0036365 | 0.7250175 | 0.049367  | 0.0089064 | 9.091776667  | 9.138781579 | 9.132544118 | 9.1884      |  |  |  |  |  |  |  |  |
| CAMK1            | ILMN_2671721 | 0.4436506 | 0.5545176 | 0.0132409 | 0.7570204 | 0.0275119 | 0.0108723 | 5.496296667  | 5.521871053 | 5.513919118 | 5.592581818 |  |  |  |  |  |  |  |  |
| SPIN2            | ILMN_2934522 | 0.6340554 | 0.9950055 | 0.0251077 | 0.5423285 | 0.0292125 | 0.0044587 | 6.355673333  | 6.370976316 | 6.355486765 | 6.451927273 |  |  |  |  |  |  |  |  |
| V1RC23           | ILMN_3004978 | 0.8737593 | 0.741798  | 0.0106524 | 0.86417   | 0.0198366 | 0.018027  | 5.682017     | 5.686805263 | 5.691661765 | 5.77972727  |  |  |  |  |  |  |  |  |
| ZFP239           | ILMN_3127381 | 0.581699  | 0.6616131 | 0.0039776 | 0.2408011 | 0.0001224 | 0.0024932 | 7.216716667  | 7.201723684 | 7.227942647 | 7.312536364 |  |  |  |  |  |  |  |  |
| COQ6             | ILMN_2766720 | 0.0609297 | 0.1767637 | 0.0005158 | 0.5643333 | 0.0293836 | 0.0150091 | 9.932686667  | 9.977407895 | 9.965157353 | 10.02839545 |  |  |  |  |  |  |  |  |
| CLCNKB           | ILMN_2757283 | 0.5241885 | 0.7711142 | 0.0094468 | 0.329601  | 0.0020966 | 0.0219642 | 5.946433333  | 5.926278947 | 5.955783824 | 6.042031818 |  |  |  |  |  |  |  |  |
| 2310051M13RIK    | ILMN_1237270 | 0.9665468 | 0.7712352 | 0.010363  | 0.7144495 | 0.0083616 | 0.005952  | 5.616203333  | 5.617539474 | 5.608520588 | 5.7118      |  |  |  |  |  |  |  |  |
| RHOT1            | ILMN_1242500 | 0.0880116 | 0.115869  | 0.0021147 | 0.7432917 | 0.0370818 | 0.0149865 | 9.741433333  | 9.783013158 | 9.776666176 | 9.836890909 |  |  |  |  |  |  |  |  |
| GPR106_LGR8_GPC  | ILMN_1232852 | 0.6559832 | 0.1943148 | 0.0048859 | 0.3798783 | 0.0075116 | 0.018548  | 5.783516667  | 5.794997368 | 5.813719118 | 5.878945455 |  |  |  |  |  |  |  |  |
| OLFR907          | ILMN_2598615 | 0.808605  | 0.1558679 | 0.0060448 | 0.074934  | 0.0033194 | 0.0356122 | 5.608323333  | 5.601023684 | 5.643789706 | 5.703095455 |  |  |  |  |  |  |  |  |
| TRABD            | ILMN_2978533 | 0.9932761 | 0.6202648 | 0.0298695 | 0.5756887 | 0.0186853 | 0.0070355 | 8.528336667  | 8.528678947 | 8.508880882 | 8.623013636 |  |  |  |  |  |  |  |  |
| BLCAP            | ILMN_2705802 | 0.2000735 | 0.9166434 | 0.0072842 | 0.0669285 | 4.606E-05 | 0.0060762 | 8.161383333  | 8.124126316 | 8.163920588 | 8.255986364 |  |  |  |  |  |  |  |  |
| GM628            | ILMN_3160644 | 0.5486986 | 0.373997  | 0.0198613 | 0.8226972 | 0.0470765 | 0.0434019 | 5.719166667  | 5.740194737 | 5.746419118 | 5.813490909 |  |  |  |  |  |  |  |  |
| DNM3             | ILMN_2482131 | 0.257664  | 0.2129101 | 0.0029941 | 0.9502021 | 0.0252594 | 0.0271116 | 5.678993333  | 5.708965789 | 5.710380882 | 5.771918182 |  |  |  |  |  |  |  |  |
| MCPT6            | ILMN_3161036 | 0.3075769 | 0.3338097 | 0.0163978 | 0.9128994 | 0.0019187 | 0.0012382 | 5.812683333  | 5.779026316 | 5.782316176 | 5.905395455 |  |  |  |  |  |  |  |  |
| MAMPKPK2         | ILMN_2614212 | 0.3405698 | 0.9789861 | 0.0144365 | 0.2270708 | 0.0002685 | 0.0036369 | 10.01880333  | 9.9891      | 10.01956471 | 10.11131818 |  |  |  |  |  |  |  |  |
| FAM123A          | ILMN_2456075 | 0.40995   | 0.9842072 | 0.0055417 | 0.3393686 | 0.0161379 | 0.0011625 | 5.86123      | 5.882305263 | 5.861704412 | 5.953740909 |  |  |  |  |  |  |  |  |
| SAMD10           | ILMN_2656359 | 0.1227068 | 0.7510529 | 0.0333693 | 0.0739749 | 0.0008446 | 0.0023264 | 6.993723333  | 6.932505263 | 6.984454412 | 7.085995455 |  |  |  |  |  |  |  |  |
| ZFP748           | ILMN_3083372 | 0.9505811 | 0.723013  |           |           |           |           |              |             |             |             |  |  |  |  |  |  |  |  |

|                  |              |           |           |           |           |           |           |             |             |             |             |  |  |  |  |  |  |
|------------------|--------------|-----------|-----------|-----------|-----------|-----------|-----------|-------------|-------------|-------------|-------------|--|--|--|--|--|--|
| MLANA            | ILMN_2624504 | 0.8366064 | 0.9717368 | 0.0342591 | 0.7724045 | 0.0094546 | 0.0116815 | 5.76753     | 5.760731579 | 5.768636765 | 5.8595      |  |  |  |  |  |  |
| ITGA2B           | ILMN_2911123 | 0.5523529 | 0.8240584 | 0.0280837 | 0.6767155 | 0.0063309 | 0.0116275 | 6.458176667 | 6.438010526 | 6.450829412 | 6.550131818 |  |  |  |  |  |  |
| CYGB             | ILMN_2801891 | 0.7970836 | 0.5797241 | 0.0284966 | 0.3738972 | 0.0169884 | 0.0497784 | 6.101066667 | 6.091292105 | 6.119488235 | 6.193004545 |  |  |  |  |  |  |
| ATP13A1          | ILMN_1250382 | 0.504888  | 0.5304265 | 0.0137751 | 0.9567733 | 0.0278898 | 0.0261892 | 8.999603333 | 9.019186842 | 9.017792647 | 9.091486364 |  |  |  |  |  |  |
| TRIM2            | ILMN_1234848 | 0.8635114 | 0.7258571 | 0.0480353 | 0.5690486 | 0.0364928 | 0.0284386 | 5.767873333 | 5.761813158 | 5.777947059 | 5.859163636 |  |  |  |  |  |  |
| A230084A06RIK    | ILMN_1230144 | 0.438214  | 0.7908668 | 0.017746  | 0.5822307 | 0.0008696 | 0.0054444 | 5.812173333 | 5.788897368 | 5.803954412 | 5.903431818 |  |  |  |  |  |  |
| CXCL14           | ILMN_2659426 | 0.3672578 | 0.6984898 | 0.0227136 | 0.5363132 | 0.0014648 | 0.0040045 | 5.63365     | 5.604478947 | 5.621769118 | 5.724809091 |  |  |  |  |  |  |
| TTC15            | ILMN_2502614 | 0.9478116 | 0.2793105 | 0.0146119 | 0.2251028 | 0.0003816 | 0.0003816 | 7.225596667 | 7.227939474 | 7.191466176 | 7.316681818 |  |  |  |  |  |  |
| TG737RPW         | ILMN_2772847 | 0.769335  | 0.5408913 | 0.0125609 | 0.3251282 | 0.0054868 | 0.032187  | 6.282606667 | 6.273515789 | 6.300575    | 6.372831818 |  |  |  |  |  |  |
| AMBRA1           | ILMN_3048294 | 0.4436924 | 0.3474318 | 0.0044493 | 0.897776  | 0.0232608 | 0.0215698 | 5.725223333 | 5.745826316 | 5.748851471 | 5.815154545 |  |  |  |  |  |  |
| control_ILMN_137 | ILMN_1378677 | 0.9834438 | 0.4208402 | 0.0119587 | 0.3634062 | 0.0064359 | 0.0105893 | 5.97326     | 5.972618421 | 5.993672059 | 6.063127273 |  |  |  |  |  |  |
| PEF1             | ILMN_2643723 | 0.3190562 | 0.349924  | 0.0023136 | 0.9026663 | 0.0456968 | 0.0324455 | 9.281666667 | 9.310060526 | 9.306907353 | 9.371368182 |  |  |  |  |  |  |
| DOHXS9928E       | ILMN_2856628 | 0.9868439 | 0.2430322 | 0.0119803 | 0.1947226 | 0.0068983 | 0.0411307 | 9.81716     | 9.816639474 | 9.848302941 | 9.90685     |  |  |  |  |  |  |
| 9/2/13           | ILMN_2756696 | 0.4036944 | 0.7067578 | 0.0062425 | 0.6412731 | 0.032992  | 0.0116011 | 5.95884     | 5.979671053 | 5.968436765 | 6.048472727 |  |  |  |  |  |  |
| OLFR519          | ILMN_2854265 | 0.6487248 | 0.8306964 | 0.0441492 | 0.4397773 | 0.0088403 | 0.0439192 | 5.661136667 | 5.643110526 | 5.669105882 | 5.750636364 |  |  |  |  |  |  |
| OLFR312          | ILMN_3161363 | 0.3709362 | 0.9122832 | 0.0341618 | 0.2388347 | 0.0006155 | 0.0205264 | 5.722203333 | 5.691555263 | 5.725964706 | 5.811631818 |  |  |  |  |  |  |
| AMBRA1           | ILMN_3124160 | 0.1300997 | 0.3534726 | 0.0171014 | 0.387355  | 2.983E-05 | 0.0002112 | 8.782346667 | 8.732421053 | 8.754764706 | 8.87175     |  |  |  |  |  |  |
| COL4A1           | ILMN_2621643 | 0.4260512 | 0.741024  | 0.0226211 | 0.5854495 | 0.000579  | 0.0037227 | 6.219506667 | 6.194963158 | 6.209345588 | 6.308686364 |  |  |  |  |  |  |
| A1844366         | ILMN_2684007 | 0.8267983 | 0.7540866 | 0.0158645 | 0.9546165 | 0.0021707 | 0.0003333 | 5.80145     | 5.794457895 | 5.793163235 | 5.890395455 |  |  |  |  |  |  |
| CAR6             | ILMN_1257323 | 0.6178161 | 0.3420742 | 0.0128943 | 0.0987578 | 0.0011396 | 0.0434174 | 5.65408     | 5.63995     | 5.680355882 | 5.743022727 |  |  |  |  |  |  |
| PLD1             | ILMN_2595408 | 0.6933796 | 0.4598863 | 0.0261827 | 0.1848692 | 0.0031361 | 0.0417093 | 5.90579     | 5.893855263 | 5.927305882 | 5.994177273 |  |  |  |  |  |  |
| C230092H20RIK    | ILMN_1233960 | 0.6635724 | 0.8478167 | 0.0125377 | 0.4360673 | 0.0039406 | 0.0017189 | 5.8978      | 5.885568421 | 5.901997059 | 5.986186364 |  |  |  |  |  |  |
| GSTK1            | ILMN_2792924 | 0.4032401 | 0.7012269 | 0.0255146 | 0.5506278 | 0.0012396 | 0.003184  | 8.39841     | 8.369881579 | 8.386477941 | 8.48635     |  |  |  |  |  |  |
| EPM2A            | ILMN_2920454 | 0.8794744 | 0.8061546 | 0.0132493 | 0.959312  | 0.0124013 | 0.0011846 | 5.76621     | 5.761413158 | 5.760173529 | 5.853804545 |  |  |  |  |  |  |
| LOC383439        | ILMN_2539543 | 0.2952126 | 0.9774352 | 0.0025687 | 0.1846293 | 0.0001346 | 0.0003456 | 5.70715     | 5.681865789 | 5.707725    | 5.794672727 |  |  |  |  |  |  |
| C730048C13RIK    | ILMN_2685022 | 0.2852307 | 0.2000217 | 0.0027292 | 0.9797444 | 0.036687  | 0.0173485 | 5.911796667 | 5.940139474 | 5.940685294 | 5.9992      |  |  |  |  |  |  |
| 2210010L05RIK    | ILMN_2599306 | 0.7962894 | 0.7235455 | 0.0103897 | 0.9415268 | 0.0088344 | 0.0059479 | 5.890833333 | 5.596602632 | 5.598317647 | 5.676368182 |  |  |  |  |  |  |
| NAPA             | ILMN_2865822 | 0.765486  | 0.7354396 | 0.0219155 | 0.9886115 | 0.0101871 | 0.0021767 | 8.002653333 | 7.993915789 | 7.994260294 | 8.089840909 |  |  |  |  |  |  |
| GABRG1           | ILMN_1245521 | 0.8166826 | 0.7082468 | 0.0148667 | 0.8735121 | 0.0120432 | 0.0154195 | 5.539946667 | 5.546115789 | 5.549933824 | 5.626995455 |  |  |  |  |  |  |
| 4930471I01RIK    | ILMN_1249396 | 0.2839252 | 0.5667521 | 0.0059659 | 0.5439773 | 0.0084971 | 0.0042064 | 5.840526667 | 5.865676316 | 5.854005882 | 5.927468182 |  |  |  |  |  |  |
| COBL1            | ILMN_2782634 | 0.9710692 | 0.2118397 | 0.0255754 | 0.1196364 | 0.0050579 | 4.622E-05 | 7.115376667 | 7.116502632 | 7.080435294 | 7.202304545 |  |  |  |  |  |  |
| CNTLN            | ILMN_1240584 | 0.3068149 | 0.1586001 | 0.0077427 | 0.7782586 | 0.0372153 | 0.0339742 | 5.61508     | 5.641421053 | 5.647154412 | 5.701913636 |  |  |  |  |  |  |
| TSNAXIP1         | ILMN_2881498 | 0.9924676 | 0.90236   | 0.0071163 | 0.9143399 | 0.0261038 | 0.0062068 | 5.814843333 | 5.814523684 | 5.811405882 | 5.901509091 |  |  |  |  |  |  |
| A4GALT           | ILMN_3009373 | 0.8116153 | 0.5693332 | 0.0184883 | 0.736504  | 0.021082  | 0.0257947 | 5.785286667 | 5.792531579 | 5.801111765 | 5.871859091 |  |  |  |  |  |  |
| CHGA             | ILMN_2814927 | 0.3483913 | 0.7266219 | 0.0096339 | 0.1381136 | 0.0005824 | 0.0091828 | 5.746556667 | 5.719539474 | 5.755676471 | 5.832945455 |  |  |  |  |  |  |
| SOX7             | ILMN_1234505 | 0.6093964 | 0.3749197 | 0.021001  | 0.097519  | 0.0254778 | 0.0002976 | 6.187313333 | 6.202473684 | 6.163425    | 6.273668182 |  |  |  |  |  |  |
| KIF17            | ILMN_2704842 | 0.3924928 | 0.7016444 | 0.0148383 | 0.5102019 | 0.0442288 | 0.0077901 | 5.8875      | 5.912607895 | 5.897030882 | 5.973745455 |  |  |  |  |  |  |
| KDCA1            | ILMN_2755241 | 0.9154914 | 0.5353693 | 0.0386027 | 0.3891859 | 0.0087424 | 0.0495258 | 5.64207     | 5.638189474 | 5.662566176 | 5.727986364 |  |  |  |  |  |  |
| TCF7L2           | ILMN_1231177 | 0.6368615 | 0.7232551 | 0.0093115 | 0.7890029 | 0.0050373 | 0.0004892 | 5.724723333 | 5.710573684 | 5.716716176 | 5.810431818 |  |  |  |  |  |  |
| OLFR506          | ILMN_2813771 | 0.2185635 | 0.1278011 | 0.0257981 | 0.934357  | 0.0002361 | 2.424E-05 | 5.67991     | 5.637868421 | 5.635769118 | 5.765595455 |  |  |  |  |  |  |
| WNK2             | ILMN_1214402 | 0.9320074 | 0.6358419 | 0.0308033 | 0.662214  | 0.0141372 | 0.0324535 | 5.703856667 | 5.706834211 | 5.718935294 | 5.789340909 |  |  |  |  |  |  |
| 8030455F02RIK    | ILMN_2551098 | 0.5985382 | 0.1917938 | 0.0111058 | 0.4126604 | 0.0153009 | 0.0482003 | 5.73374     | 5.748163158 | 5.765951471 | 5.819077273 |  |  |  |  |  |  |
| D430013G08RIK    | ILMN_1241865 | 0.4394908 | 0.7898042 | 0.0137003 | 0.5944586 | 0.0174799 | 0.0124872 | 5.650593333 | 5.670342105 | 5.657922059 | 5.735872727 |  |  |  |  |  |  |
| NRXN1            | ILMN_2550623 | 0.4470251 | 0.6243021 | 0.0095758 | 0.7062275 | 0.0001669 | 0.0003535 | 5.979573333 | 5.959471053 | 5.967466176 | 6.064813636 |  |  |  |  |  |  |
| WIZ              | ILMN_3095005 | 0.3430532 | 0.7241176 | 0.0455579 | 0.3711582 | 0.0016648 | 0.0030671 | 7.21713     | 7.182071053 | 7.206314706 | 7.301809091 |  |  |  |  |  |  |
| BPHL             | ILMN_2747284 | 0.7341613 | 0.6190805 | 0.0071592 | 0.3685003 | 0.0121313 | 0.0012581 | 5.726646667 | 5.735092105 | 5.714341176 | 5.811322727 |  |  |  |  |  |  |
| EG665903         | ILMN_2624523 | 0.867418  | 0.9975489 | 0.0130084 | 0.8205651 | 0.0023711 | 0.0012322 | 5.54671     | 5.541965789 | 5.546788235 | 5.631263636 |  |  |  |  |  |  |
| GPSN2            | ILMN_2606579 | 0.6369265 | 0.6787878 | 0.0467409 | 0.2847033 | 0.0127211 | 0.0376058 | 11.36477667 | 11.34527632 | 11.37852794 | 11.44931364 |  |  |  |  |  |  |
| V1RG5            | ILMN_2838831 | 0.824207  | 0.9841046 | 0.013051  | 0.8081059 | 0.0152872 | 0.0055188 | 5.585696667 | 5.592194737 | 5.586235294 | 5.669590909 |  |  |  |  |  |  |
| LOC668779        | ILMN_1248416 | 0.6353751 | 0.7961937 | 0.0193804 | 0.3512141 | 0.008817  | 0.0011392 | 5.82907     | 5.841984211 | 5.822419118 | 5.91275     |  |  |  |  |  |  |
| AW538212         | ILMN_2688996 | 0.1153576 | 0.0942852 | 0.004006  | 0.992924  | 0.0001064 | 3.481E-05 | 5.662       | 5.618852632 | 5.619076471 | 5.745609091 |  |  |  |  |  |  |
| D930029H24RIK    | ILMN_1228871 | 0.4741864 | 0.4712487 | 0.0066788 | 0.986283  | 0.001112  | 0.000874  | 5.586836667 | 5.5675      | 5.567926471 | 5.670409091 |  |  |  |  |  |  |
| control_ILMN_137 | ILMN_1379309 | 0.7754473 | 0.6056504 | 0.0167735 | 0.8189121 | 0.0339137 | 0.0412178 | 5.740433333 | 5.749018421 | 5.755252941 | 5.823736364 |  |  |  |  |  |  |
| MFS07C           | ILMN_1248190 | 0.921069  | 0.2732591 | 0.0172727 | 0.216696  | 0.0190112 | 0.0492927 | 5.92774     | 5.924468421 | 5.955697059 | 6.011031818 |  |  |  |  |  |  |
| EFNA5            | ILMN_2662536 | 0.3652588 | 0.5570784 | 0.0099712 | 0.1089818 | 0.0016573 | 0.0402057 | 5.71599     | 5.688497368 | 5.732614706 | 5.799154545 |  |  |  |  |  |  |
| DMXL1            | ILMN_2429071 | 0.549142  | 0.9045195 | 0.0143862 | 0.5220237 | 0.0117717 | 0.0018762 | 5.96065     | 5.975723684 | 5.963417647 | 6.043718182 |  |  |  |  |  |  |
| LOC276803        | ILMN_2534316 | 0.1660366 | 0.5484472 | 0.0219723 | 0.2751194 | 0.0007734 | 0.00151   | 5.940693333 | 5.897260526 | 5.924936765 | 6.02375     |  |  |  |  |  |  |
| 2810043G13RIK    | ILMN_2705440 | 0.8139185 | 0.2479328 | 0.0098315 | 0.326601  | 0.0071206 | 0.0171305 | 5.881486667 | 5.887989474 | 5.907816176 | 5.964436364 |  |  |  |  |  |  |
| ABCF3            | ILMN_2677696 | 0.0807858 | 0.6364522 | 0.0019293 | 0.1713271 | 3.673E-05 | 0.0011514 | 9.548456667 | 9.504076316 | 9.536877941 | 9.6311      |  |  |  |  |  |  |
| 9830166F08RIK    | ILMN_2586977 | 0.7065803 | 0.8033313 | 0.037432  | 0.8797518 | 0.0111999 | 0.0167932 | 5.70739     | 5.718118421 | 5.714625    | 5.789945455 |  |  |  |  |  |  |









|               |              |           |           |           |           |           |           |             |             |             |             |  |  |  |  |  |  |
|---------------|--------------|-----------|-----------|-----------|-----------|-----------|-----------|-------------|-------------|-------------|-------------|--|--|--|--|--|--|
| HLTF          | ILMN_2604086 | 0.1043547 | 0.0745037 | 0.0008757 | 0.9698134 | 0.015693  | 0.0119087 | 6.093073333 | 6.029134211 | 6.027913235 | 5.924654545 |  |  |  |  |  |  |
| FNBP4         | ILMN_1260410 | 0.8308135 | 0.2444176 | 0.0026371 | 0.3010981 | 0.00159   | 0.0094423 | 7.02603     | 7.015605263 | 6.975920588 | 6.858595455 |  |  |  |  |  |  |
| LOC623121     | ILMN_2526938 | 0.1192934 | 0.3685915 | 0.0126513 | 0.3275128 | 6.554E-05 | 0.0001654 | 7.308336667 | 7.396323684 | 7.352626471 | 7.142136364 |  |  |  |  |  |  |
| 3300001P08RIK | ILMN_2798797 | 0.2603699 | 0.0906179 | 0.0011878 | 0.7227731 | 0.0025688 | 0.0005881 | 10.70506    | 10.66184211 | 10.65289118 | 10.53989545 |  |  |  |  |  |  |
| LOC100048622  | ILMN_2677056 | 0.8875675 | 0.6150394 | 0.0061871 | 0.4324741 | 0.000341  | 0.0026012 | 9.917543333 | 9.924692105 | 9.894410294 | 9.753277273 |  |  |  |  |  |  |
| C430005L07RIK | ILMN_1231989 | 0.058126  | 0.0629128 | 0.0006098 | 0.8300766 | 0.0137559 | 0.0072494 | 6.22569     | 6.156028947 | 6.162217647 | 6.062545455 |  |  |  |  |  |  |
| ZFP654        | ILMN_2634157 | 0.0690439 | 0.4576866 | 7.378E-06 | 0.2158423 | 0.0004514 | 1.882E-05 | 7.83237     | 7.779128947 | 7.811010294 | 7.670627273 |  |  |  |  |  |  |
| E030040J04RIK | ILMN_2582659 | 0.6078898 | 0.9458919 | 0.0006524 | 0.5975726 | 1.549E-05 | 5.698E-05 | 6.016863333 | 5.998997368 | 6.014388235 | 5.85555     |  |  |  |  |  |  |
| ARL4C         | ILMN_1232537 | 0.7411904 | 0.1262729 | 0.0022258 | 0.0511661 | 0.0052297 | 3.71E-06  | 8.98283     | 8.969447368 | 9.037364706 | 8.822018182 |  |  |  |  |  |  |
| ARID4A        | ILMN_1249368 | 0.6347784 | 0.2253888 | 0.0129741 | 0.4512613 | 0.0144791 | 0.0290618 | 7.24665     | 7.221260526 | 7.191375    | 7.086068182 |  |  |  |  |  |  |
| LOC546629     | ILMN_2514130 | 0.1422128 | 0.1149133 | 0.0001395 | 0.842507  | 0.0031759 | 0.0067875 | 6.201816667 | 6.155281579 | 6.149257353 | 6.041940909 |  |  |  |  |  |  |
| TDP1          | ILMN_1222101 | 0.2047179 | 0.2160393 | 0.000427  | 0.7660188 | 0.009534  | 0.0015996 | 7.001043333 | 6.9467      | 6.956392647 | 6.841454545 |  |  |  |  |  |  |
| CUL1          | ILMN_1226323 | 0.0934383 | 0.0689027 | 0.0020377 | 0.7614183 | 0.0417649 | 0.0066512 | 8.832946667 | 8.763292105 | 8.772133824 | 8.675431818 |  |  |  |  |  |  |
| D030041G07RIK | ILMN_1242969 | 0.1886471 | 0.0625491 | 0.0009933 | 0.6143277 | 0.0080014 | 0.01659   | 7.062546667 | 7.013210526 | 6.998004412 | 6.907159091 |  |  |  |  |  |  |
| E130014H08RIK | ILMN_2680388 | 0.0669437 | 0.0611037 | 6.369E-05 | 0.9737956 | 0.0118435 | 0.0114303 | 6.120063333 | 6.056794737 | 6.057810294 | 5.964904545 |  |  |  |  |  |  |
| TRAF5         | ILMN_2440604 | 0.5245563 | 0.240113  | 0.0069051 | 0.5272163 | 0.002895  | 0.021429  | 6.81995     | 6.790965789 | 6.768398529 | 6.664904545 |  |  |  |  |  |  |
| PPP2R5C       | ILMN_2742461 | 0.1137921 | 0.0822204 | 0.000379  | 0.9294784 | 0.0116573 | 0.003355  | 6.077013333 | 6.021755263 | 6.024205882 | 5.922486364 |  |  |  |  |  |  |
| MTF2          | ILMN_2703913 | 0.2003631 | 0.2985865 | 0.0037587 | 0.69841   | 0.0338986 | 0.0131918 | 10.53759667 | 10.48152632 | 10.49541324 | 10.38590909 |  |  |  |  |  |  |
| WDR20B        | ILMN_1235032 | 0.2378139 | 0.4785172 | 0.0001924 | 0.4562457 | 6.383E-05 | 6.788E-06 | 5.85008     | 5.813589474 | 5.830157353 | 5.698718182 |  |  |  |  |  |  |
| RNF125        | ILMN_1232600 | 0.9821989 | 0.0966035 | 0.0004117 | 0.0954952 | 0.0011395 | 5.261E-07 | 7.012443333 | 7.011668421 | 7.063036765 | 6.861245455 |  |  |  |  |  |  |
| 9330168G06RIK | ILMN_1246293 | 0.541902  | 0.4831022 | 0.0002415 | 0.9455771 | 0.001393  | 0.0014771 | 6.250186667 | 6.227921053 | 6.225692647 | 6.100836364 |  |  |  |  |  |  |
| LAMP2         | ILMN_2577206 | 0.8191765 | 0.0539446 | 0.0008346 | 0.0790161 | 0.0013531 | 0.0184912 | 6.187146667 | 6.178439474 | 6.124277941 | 6.037936364 |  |  |  |  |  |  |
| JMJD1A        | ILMN_3043245 | 0.3184575 | 0.6524928 | 0.0002081 | 0.0721281 | 0.0003896 | 5.234E-07 | 8.215583333 | 8.183889474 | 8.228458824 | 8.066877273 |  |  |  |  |  |  |
| ST8SIA4       | ILMN_2784230 | 0.1349801 | 0.4757493 | 0.0010337 | 0.2606324 | 0.0282489 | 0.0007833 | 9.773773333 | 9.715015789 | 9.749726471 | 9.625213636 |  |  |  |  |  |  |
| LRBA          | ILMN_2659960 | 0.1799484 | 0.133935  | 0.0017445 | 0.9397744 | 0.0020409 | 0.0009886 | 9.108856667 | 9.059176316 | 9.061001471 | 8.960695455 |  |  |  |  |  |  |
| TDE2          | ILMN_2775381 | 0.9569371 | 0.1312657 | 0.0031592 | 0.0902878 | 0.0004224 | 0.023742  | 9.271143333 | 9.2688      | 9.211947059 | 9.123181818 |  |  |  |  |  |  |
| 9/6/13        | ILMN_2681293 | 0.6376283 | 0.2496409 | 0.013978  | 0.4764143 | 0.0147626 | 0.042388  | 7.035323333 | 7.010981579 | 6.982983824 | 6.888654545 |  |  |  |  |  |  |
| D830015B12RIK | ILMN_1234367 | 0.3056546 | 0.0722794 | 0.000227  | 0.5230609 | 0.0080097 | 0.0113831 | 6.263736667 | 6.227584211 | 6.208301471 | 6.117745455 |  |  |  |  |  |  |
| PARD6G        | ILMN_1237631 | 0.6758842 | 0.678385  | 0.0008684 | 0.9647959 | 0.0005219 | 0.0001265 | 7.15756     | 7.144507895 | 7.145636765 | 7.011668182 |  |  |  |  |  |  |
| 4933400A11RIK | ILMN_1250324 | 0.1935489 | 0.4946985 | 0.0004042 | 0.3406698 | 0.0187275 | 0.0002919 | 5.711286667 | 5.661910526 | 5.690280882 | 5.565481818 |  |  |  |  |  |  |
| 2210016L21RIK | ILMN_1251123 | 0.0684124 | 0.16045   | 0.0003539 | 0.64567   | 0.0044914 | 0.0025111 | 5.983086667 | 5.929236842 | 5.940947059 | 5.837568182 |  |  |  |  |  |  |
| MDM1          | ILMN_2754667 | 0.2519943 | 0.245198  | 0.0003565 | 0.8734112 | 0.0067575 | 0.0011209 | 5.990166667 | 5.953171053 | 5.957473529 | 5.8456      |  |  |  |  |  |  |
| CDC37L1       | ILMN_1242724 | 0.432965  | 0.761838  | 0.0018235 | 0.5048792 | 0.0099697 | 0.0004164 | 6.163896667 | 6.133318421 | 6.153929412 | 6.019554545 |  |  |  |  |  |  |
| B230215E14RIK | ILMN_1229011 | 0.592917  | 0.1953042 | 0.0001056 | 0.4836819 | 0.0009696 | 0.0011241 | 6.061116667 | 6.044002632 | 6.024869118 | 5.917009091 |  |  |  |  |  |  |
| POM121        | ILMN_1232596 | 0.4266327 | 0.8235093 | 0.0023101 | 0.2179086 | 5.406E-05 | 0.0005903 | 7.310896667 | 7.342360526 | 7.30295     | 7.167040909 |  |  |  |  |  |  |
| FOXN3         | ILMN_2844097 | 0.263597  | 0.2044031 | 0.0046681 | 0.8933949 | 0.0175122 | 0.0032148 | 8.376153333 | 8.329744737 | 8.333529412 | 8.232445455 |  |  |  |  |  |  |
| A130021K16RIK | ILMN_1251811 | 0.8195515 | 0.4426985 | 8.698E-05 | 0.2763052 | 6.792E-05 | 1.399E-05 | 5.984683333 | 5.9924      | 5.964948529 | 5.84155     |  |  |  |  |  |  |
| DAG1          | ILMN_2853957 | 0.4252381 | 0.0602344 | 0.0057935 | 0.2406018 | 0.0046716 | 0.021198  | 7.180286667 | 7.147947368 | 7.115838235 | 7.037163636 |  |  |  |  |  |  |
| BIRC6         | ILMN_1249233 | 0.4536278 | 0.3353887 | 0.0003783 | 0.8309255 | 0.0019878 | 0.0030886 | 6.940266667 | 6.915202632 | 6.908766176 | 6.797263636 |  |  |  |  |  |  |
| 4930529C04RIK | ILMN_2725583 | 0.0698677 | 0.1711347 | 0.0008444 | 0.3333943 | 0.0233341 | 0.0005803 | 6.085303333 | 6.024965789 | 6.048104412 | 5.942704545 |  |  |  |  |  |  |
| SLC16A6       | ILMN_1258950 | 0.2276815 | 0.1853384 | 0.0017589 | 0.9140867 | 0.0359606 | 0.0474072 | 7.43912     | 7.390255263 | 7.386244118 | 7.296981818 |  |  |  |  |  |  |
| LRRC40        | ILMN_2647476 | 0.4646448 | 0.0601038 | 0.0005519 | 0.2406174 | 0.0007111 | 0.0022764 | 6.164913333 | 6.141073684 | 6.113097059 | 6.023013636 |  |  |  |  |  |  |
| BC051070      | ILMN_1231143 | 0.2116225 | 0.6464236 | 0.0013109 | 0.3151572 | 0.0076044 | 0.0004444 | 5.77394     | 5.731926316 | 5.759560294 | 5.632954545 |  |  |  |  |  |  |
| LOC100045804  | ILMN_1234370 | 0.3382488 | 0.1790407 | 0.0002281 | 0.8746705 | 0.0040019 | 0.0007338 | 6.080636667 | 6.046034211 | 6.041739706 | 5.939822727 |  |  |  |  |  |  |
| HS2D          | ILMN_1239119 | 0.1471192 | 0.5429422 | 0.0124357 | 0.2283693 | 0.0322786 | 0.0041383 | 7.86715     | 7.806244737 | 7.842983824 | 7.726418182 |  |  |  |  |  |  |
| VPS26B        | ILMN_2631192 | 0.4877351 | 0.9609904 | 0.034198  | 0.3065398 | 0.0480956 | 0.0011512 | 6.30113     | 6.266228947 | 6.299214706 | 6.160686364 |  |  |  |  |  |  |
| ST6GAL2       | ILMN_2593002 | 0.9558336 | 0.6548532 | 0.0032893 | 0.6389678 | 0.00014   | 9.679E-06 | 5.81399     | 5.816073684 | 5.828707353 | 5.674245455 |  |  |  |  |  |  |
| TMPSR511A     | ILMN_2890069 | 0.2867067 | 0.0781389 | 0.0083851 | 0.5779337 | 0.0331219 | 0.0413402 | 5.94694     | 5.900107895 | 5.882957353 | 5.808109091 |  |  |  |  |  |  |
| RAB27A        | ILMN_2614966 | 0.3536785 | 0.847606  | 4.128E-05 | 0.1417117 | 0.0003182 | 2.305E-08 | 9.618303333 | 9.593155263 | 9.622351471 | 9.480636364 |  |  |  |  |  |  |
| LOC674087     | ILMN_1227317 | 0.7428081 | 0.5889824 | 0.0356504 | 0.8518412 | 0.0432128 | 0.0485043 | 8.063523333 | 8.043044737 | 8.033966176 | 7.926122727 |  |  |  |  |  |  |
| 1600012H06RIK | ILMN_2718861 | 0.8735272 | 0.6882422 | 0.0058169 | 0.8010036 | 0.0030669 | 0.0003194 | 7.32814     | 7.321276316 | 7.312647059 | 7.190854545 |  |  |  |  |  |  |
| 4733401O04RIK | ILMN_1241389 | 0.0677838 | 0.3952881 | 0.0014767 | 0.2311688 | 0.0481461 | 0.0036164 | 6.47715     | 6.413797368 | 6.449102941 | 6.340095455 |  |  |  |  |  |  |
| OLFR504       | ILMN_3161078 | 0.7901314 | 0.3313358 | 0.0005974 | 0.1655799 | 9.368E-05 | 0.0013106 | 5.74775     | 5.783405263 | 5.745994118 | 5.638240909 |  |  |  |  |  |  |
| ADRA1B        | ILMN_2606415 | 0.0567563 | 0.2886452 | 0.0007337 | 0.1648395 | 0.04211   | 0.0004266 | 5.788323333 | 5.726486842 | 5.760369118 | 5.652727273 |  |  |  |  |  |  |
| RAB6B         | ILMN_2761430 | 0.4774153 | 0.1361146 | 1.386E-05 | 0.4558055 | 0.0008766 | 0.0024321 | 5.805626667 | 5.7864      | 5.766961765 | 5.670081818 |  |  |  |  |  |  |
| HB-B1         | ILMN_2545963 | 0.4662621 | 0.3162032 | 0.0349087 | 0.8666362 | 0.0474617 | 0.0308178 | 13.32452667 | 13.28905789 | 13.28345588 | 13.18936818 |  |  |  |  |  |  |
| ARHGAP12      | ILMN_1227256 | 0.4817401 | 0.3480794 | 0.0002106 | 0.8572983 | 0.0007674 | 0.0003831 | 5.6783      | 5.657913158 | 5.653547059 | 5.543509091 |  |  |  |  |  |  |
| TYKI          | ILMN_1240864 | 0.7589136 | 0.2384231 | 0.0348989 | 0.0519785 | 0.0036441 | 0.0175894 | 7.718213333 | 7.733778947 | 7.673405882 | 7.583704545 |  |  |  |  |  |  |
| LOC100048616  | ILMN_1241963 | 0.7162173 | 0.3954892 | 0.0060337 | 0.6395898 | 0.0057424 | 0.0043046 | 6.623486667 | 6.608734211 | 6.594576471 | 6.489290909 |  |  |  |  |  |  |
| 2600011C06RIK | ILMN_1220104 | 0.868067  | 0.3631006 | 0.0049484 | 0.2111005 | 0.0004285 | 0.0132494 | 6.318883333 | 6.324634211 | 6.286382353 | 6.185263636 |  |  |  |  |  |  |

|                  |               |           |           |           |           |           |           |             |             |             |             |  |  |  |  |  |  |
|------------------|---------------|-----------|-----------|-----------|-----------|-----------|-----------|-------------|-------------|-------------|-------------|--|--|--|--|--|--|
| BIRC6            | ILMN_1246660  | 0.0672901 | 0.104734  | 0.0013114 | 0.7687882 | 0.0121322 | 0.0153815 | 6.316916667 | 6.256421053 | 6.264130882 | 6.184036364 |  |  |  |  |  |  |
| RGS19            | ILMN_2752044  | 0.3386985 | 0.0513674 | 0.0017904 | 0.4615514 | 0.0384581 | 0.0478533 | 6.648676667 | 6.608102632 | 6.584333824 | 6.516268182 |  |  |  |  |  |  |
| C130064E22RIK    | ILMN_1221892  | 0.273743  | 0.2907843 | 0.0008524 | 0.7721263 | 0.0288794 | 0.0045581 | 7.445486667 | 7.401763158 | 7.410882353 | 7.313245455 |  |  |  |  |  |  |
| ITK              | ILMN_2613422  | 0.2426571 | 0.1995844 | 0.0033648 | 0.9026044 | 0.0011014 | 5.597E-05 | 10.31404333 | 10.35670789 | 10.36085    | 10.18205455 |  |  |  |  |  |  |
| LCP2             | ILMN_1216191  | 0.922014  | 0.3769241 | 0.0037673 | 0.2893479 | 0.0026778 | 0.0129815 | 6.589333333 | 6.593478947 | 6.556810294 | 6.45785     |  |  |  |  |  |  |
| RBM18            | ILMN_2978585  | 0.8463194 | 0.3389752 | 0.0343126 | 0.1444854 | 0.0040046 | 0.0240736 | 7.331313333 | 7.341076316 | 7.292019118 | 7.200204545 |  |  |  |  |  |  |
| ZAP70            | ILMN_1223542  | 0.9044306 | 0.705428  | 0.0456215 | 0.540508  | 0.0105488 | 0.0188293 | 7.124003333 | 7.130486842 | 7.106404412 | 6.993336364 |  |  |  |  |  |  |
| control_ILMN_137 | ILMN_1378612  | 0.9737192 | 0.4660604 | 0.0008993 | 0.4172436 | 0.0008174 | 0.0016872 | 5.722833333 | 5.724013158 | 5.700172059 | 5.592318182 |  |  |  |  |  |  |
| MAT2A            | ILMN_1258415  | 0.9394328 | 0.9420671 | 0.0351956 | 0.8585218 | 0.0147359 | 0.0087062 | 8.35585     | 8.352134211 | 8.359186765 | 8.225568182 |  |  |  |  |  |  |
| 2210018M11RIK    | ILMN_2521686  | 0.4267156 | 0.2939019 | 0.0047618 | 0.9461691 | 0.0249755 | 0.0079197 | 6.638536667 | 6.604639474 | 6.602507353 | 6.508409091 |  |  |  |  |  |  |
| ASH1L            | ILMN_1245687  | 0.9747923 | 0.1188567 | 0.0053809 | 0.0649297 | 0.0009757 | 0.0241636 | 5.996946667 | 5.998094737 | 5.946575    | 5.8675      |  |  |  |  |  |  |
| LOXL3            | ILMN_2665272  | 0.0917949 | 0.3127426 | 0.0005144 | 0.2454262 | 0.0442597 | 0.0005322 | 5.826726667 | 5.771368421 | 5.800639706 | 5.697527273 |  |  |  |  |  |  |
| UTX              | ILMN_2506528  | 0.478826  | 0.3668646 | 0.0141063 | 0.8451567 | 0.0035826 | 0.0094907 | 9.849873333 | 9.822334211 | 9.816958824 | 9.722554545 |  |  |  |  |  |  |
| A730082L10RIK    | ILMN_1220032  | 0.4032959 | 0.0666118 | 0.0020628 | 0.3220654 | 0.0062779 | 0.0220739 | 6.309363333 | 6.281157895 | 6.255379412 | 6.182745455 |  |  |  |  |  |  |
| ITGA6            | ILMN_1223670  | 0.4066823 | 0.4327231 | 0.0030597 | 0.9994881 | 0.0018074 | 0.0045386 | 6.613506667 | 6.588739474 | 6.588763235 | 6.48725     |  |  |  |  |  |  |
| control_ILMN_137 | ILMN_1378679  | 0.7876358 | 0.0526071 | 0.0035316 | 0.0717594 | 0.0028401 | 0.033764  | 5.660046667 | 5.650981579 | 5.603908824 | 5.534195455 |  |  |  |  |  |  |
| 4930449I04RIK    | ILMN_1238088  | 0.2051735 | 0.2326247 | 3.072E-05 | 0.8975991 | 0.0010693 | 0.0008706 | 5.92482     | 5.89145     | 5.894451471 | 5.800354545 |  |  |  |  |  |  |
| TSC1             | ILMN_2423383  | 0.671018  | 0.2294959 | 0.0045867 | 0.4010538 | 0.0045924 | 0.01817   | 6.022403333 | 6.007705263 | 5.983791176 | 5.898672727 |  |  |  |  |  |  |
| MSH3             | ILMN_3068452  | 0.9862047 | 0.388591  | 0.0029183 | 0.3099282 | 0.0003842 | 0.0101609 | 6.317296667 | 6.317907895 | 6.287680882 | 6.193777273 |  |  |  |  |  |  |
| 9330171B01RIK    | ILMN_1234726  | 0.0550221 | 0.4614803 | 0.0013359 | 0.1264928 | 0.0450841 | 0.001052  | 5.83447     | 5.777323684 | 5.814472059 | 5.710968182 |  |  |  |  |  |  |
| UGT2A1           | ILMN_2434333  | 0.7105059 | 0.721824  | 0.004318  | 0.4166797 | 0.0006941 | 0.0029961 | 5.621583333 | 5.633452632 | 5.610448529 | 5.498127273 |  |  |  |  |  |  |
| C130078D09RIK    | ILMN_1244755  | 0.1278604 | 0.3250882 | 0.0031383 | 0.4791575 | 0.001815  | 0.0022079 | 6.053696552 | 6.004831579 | 6.019788235 | 5.930827273 |  |  |  |  |  |  |
| RHBDP2           | ILMN_1221129  | 0.8418475 | 0.5974591 | 0.0208933 | 0.7956291 | 0.0490314 | 0.0162212 | 6.356373333 | 6.346123684 | 6.336120588 | 6.233854545 |  |  |  |  |  |  |
| INPP4B           | ILMN_1226239  | 0.0845058 | 0.2023733 | 0.0305842 | 0.5569054 | 8.807E-05 | 0.00041   | 9.272156667 | 9.351981579 | 9.328983824 | 9.149936364 |  |  |  |  |  |  |
| NIPSNAP1         | ILMN_12619861 | 0.5290402 | 0.461368  | 0.0011652 | 0.113783  | 7.689E-05 | 0.0007688 | 9.28918     | 9.308102632 | 9.269794118 | 9.167031818 |  |  |  |  |  |  |
| LPIN2            | ILMN_1220680  | 0.8290993 | 0.4643068 | 0.0118867 | 0.6218323 | 0.0180038 | 0.0137632 | 7.60717     | 7.597921053 | 7.581547059 | 7.485290909 |  |  |  |  |  |  |
| 4833420G17RIK    | ILMN_1242705  | 0.1105861 | 0.9985108 | 0.0014004 | 0.0558918 | 0.0298299 | 0.000163  | 6.1815      | 6.133973684 | 6.181452941 | 6.059827273 |  |  |  |  |  |  |
| NTSC             | ILMN_1223097  | 0.9686998 | 0.1511051 | 0.0050398 | 0.0966739 | 0.0004879 | 0.0482836 | 10.14017667 | 10.13889474 | 10.09159412 | 10.0186     |  |  |  |  |  |  |
| D730033A03RIK    | ILMN_1237794  | 0.1053282 | 0.0793496 | 0.0011131 | 0.9966108 | 0.0192989 | 0.0159084 | 5.94283     | 5.894176316 | 5.894086765 | 5.821409091 |  |  |  |  |  |  |
| 1700011H14RIK    | ILMN_1240624  | 0.4264888 | 0.3197876 | 0.0026488 | 0.9921006 | 0.006664  | 0.0011802 | 5.766446667 | 5.738492105 | 5.738245588 | 5.645190909 |  |  |  |  |  |  |
| 4921505C17RIK    | ILMN_2552030  | 0.3260702 | 0.0961802 | 0.0032143 | 0.5557595 | 0.0192574 | 0.0277537 | 6.429206667 | 6.39755     | 6.381835294 | 6.309031818 |  |  |  |  |  |  |
| ZSCAN2           | ILMN_2481127  | 0.1016669 | 0.5049158 | 0.0025841 | 0.1920094 | 0.0493325 | 0.0019485 | 5.832116667 | 5.778686842 | 5.812569118 | 5.711959091 |  |  |  |  |  |  |
| ATL1             | ILMN_2689284  | 0.0990851 | 0.0909213 | 0.0022863 | 0.97929   | 0.0491833 | 0.0478299 | 5.71863     | 5.665681579 | 5.666389706 | 5.5989      |  |  |  |  |  |  |
| COP21            | ILMN_1223544  | 0.5564383 | 0.2108712 | 0.0079137 | 0.4514929 | 0.0094923 | 0.0431359 | 6.3019      | 6.281852632 | 6.259785294 | 6.182704545 |  |  |  |  |  |  |
| 4921506M07RIK    | ILMN_1226012  | 0.767214  | 0.1867961 | 0.004993  | 0.2845122 | 0.0061465 | 0.0237657 | 5.789413333 | 5.778978947 | 5.748717647 | 5.670604545 |  |  |  |  |  |  |
| 4921506J03RIK    | ILMN_2541863  | 0.058196  | 0.2388861 | 0.000234  | 0.3718193 | 0.0199308 | 0.0033724 | 9.92524     | 9.871423684 | 9.893135294 | 9.807481818 |  |  |  |  |  |  |
| GADD45GIP1       | ILMN_2830860  | 0.7473828 | 0.3343774 | 0.0065388 | 0.1661634 | 0.0033004 | 0.035656  | 5.926886667 | 5.9394      | 5.892926471 | 5.809209091 |  |  |  |  |  |  |
| RDH1             | ILMN_1230677  | 0.813449  | 0.2978746 | 0.0008105 | 0.3661283 | 0.000248  | 0.0023484 | 5.70993     | 5.703157895 | 5.681833824 | 5.592604545 |  |  |  |  |  |  |
| IKZF5            | ILMN_2963412  | 0.4399219 | 0.4429187 | 0.0164708 | 0.8589593 | 0.024909  | 0.0071278 | 7.25512     | 7.225368421 | 7.230170588 | 7.138109091 |  |  |  |  |  |  |
| LOC385046        | ILMN_2541806  | 0.430148  | 0.1400567 | 0.0010304 | 0.4703621 | 0.0012962 | 0.0068437 | 5.73528     | 5.711797368 | 5.694930882 | 5.618386364 |  |  |  |  |  |  |
| BC057371         | ILMN_2676745  | 0.3145201 | 0.5342862 | 0.0025901 | 0.4806966 | 0.0001558 | 1.217E-05 | 5.73612     | 5.768484211 | 5.751522059 | 5.619290909 |  |  |  |  |  |  |
| 9830118G07RIK    | ILMN_1214091  | 0.1906198 | 0.1768389 | 0.0059989 | 0.8446158 | 0.0326653 | 0.0100365 | 6.56715     | 6.525489474 | 6.530077941 | 6.450931818 |  |  |  |  |  |  |
| MRP531           | ILMN_2723162  | 0.1588756 | 0.3209264 | 0.0008342 | 0.4173279 | 0.0486679 | 0.0016695 | 5.696653333 | 5.649865789 | 5.670588235 | 5.580590909 |  |  |  |  |  |  |
| 1600029O10RIK    | ILMN_2546461  | 0.0997031 | 0.9814076 | 0.0169889 | 0.0514996 | 8.173E-05 | 0.0130412 | 7.692803333 | 7.769444737 | 7.691802941 | 7.576986364 |  |  |  |  |  |  |
| OLFR125          | ILMN_2730288  | 0.1313929 | 0.5800322 | 0.0003406 | 0.2929673 | 0.0309284 | 0.001393  | 5.710643333 | 5.670455263 | 5.696926471 | 5.594827273 |  |  |  |  |  |  |
| SPCS2            | ILMN_2762956  | 0.1761219 | 0.3131761 | 0.0115366 | 0.6079863 | 6.658E-05 | 0.000131  | 5.935356667 | 5.986028947 | 5.970344118 | 5.819986364 |  |  |  |  |  |  |
| BCL10            | ILMN_1215785  | 0.5150295 | 0.3431271 | 0.0067767 | 0.8020252 | 0.0235364 | 0.0239616 | 6.291966667 | 6.268534211 | 6.260922059 | 6.176790909 |  |  |  |  |  |  |
| BCL11B           | ILMN_1223119  | 0.1978185 | 0.243168  | 0.0250749 | 0.6949597 | 0.0005304 | 0.0001287 | 6.466986667 | 6.517447368 | 6.505741176 | 6.351922727 |  |  |  |  |  |  |
| control_ILMN_137 | ILMN_1379152  | 0.217537  | 0.0923344 | 0.0022973 | 0.6192088 | 0.016625  | 0.0433882 | 5.677653333 | 5.641942105 | 5.629272059 | 5.562736364 |  |  |  |  |  |  |
| DPPA4            | ILMN_3155408  | 0.1739081 | 0.2702328 | 0.0008807 | 0.4273251 | 0.0264242 | 0.0002288 | 5.814133333 | 5.774526316 | 5.790995588 | 5.699431818 |  |  |  |  |  |  |
| D12WSU95E        | ILMN_1224518  | 0.2458634 | 0.989498  | 0.0016895 | 0.1792432 | 2.626E-05 | 0.0006446 | 9.425403333 | 9.463215789 | 9.425804412 | 9.310904545 |  |  |  |  |  |  |
| 1700045I19RIK    | ILMN_2967255  | 0.1534703 | 0.2851101 | 0.0006986 | 0.543461  | 0.0309232 | 0.0036094 | 5.913596667 | 5.870136842 | 5.885326471 | 5.799536364 |  |  |  |  |  |  |
| MK167            | ILMN_1222340  | 0.2184501 | 0.1058261 | 0.0015179 | 0.6875769 | 0.0138791 | 0.0219347 | 5.71464     | 5.682371053 | 5.672839706 | 5.600581818 |  |  |  |  |  |  |
| HIRA             | ILMN_1255703  | 0.6950285 | 0.4770547 | 0.0026956 | 0.1888999 | 0.0015154 | 1.642E-05 | 5.71061     | 5.698692105 | 5.730233824 | 5.596768182 |  |  |  |  |  |  |
| BC016608         | ILMN_2652989  | 0.5083434 | 0.2407567 | 0.0072926 | 0.5462652 | 0.0029047 | 0.0137972 | 5.873616667 | 5.852886842 | 5.838388235 | 5.7599      |  |  |  |  |  |  |
| HIVEP3           | ILMN_3151547  | 0.6221573 | 0.5784284 | 0.0063473 | 0.9821112 | 0.02066   | 0.0080704 | 5.8143      | 5.795202632 | 5.795891176 | 5.700604545 |  |  |  |  |  |  |
| CDKN1B           | ILMN_2638428  | 0.917025  | 0.2609223 | 0.0009443 | 0.1910727 | 0.0007663 | 0.004622  | 6.319963333 | 6.323197368 | 6.290032353 | 6.206463636 |  |  |  |  |  |  |
| TMEM146          | ILMN_1234738  | 0.5596329 | 0.2605099 | 0.0104122 | 0.5389246 | 0.0080401 | 0.0295507 | 6.1685      | 6.148844737 | 6.132217647 | 6.056054545 |  |  |  |  |  |  |
| ELF2             | ILMN_1251296  | 0.6285277 | 0.9913975 | 0.0172094 | 0.5581871 | 0.0130433 | 0.0035537 | 6.475283333 | 6.457747368 | 6.474922059 | 6.362845455 |  |  |  |  |  |  |
| LOC100046343     | ILMN_1230976  | 0.9248882 | 0.4685428 | 0.0162763 | 0.4630621 | 0.0043081 | 0.0178511 | 8.632353333 | 8.628797368 | 8.607308824 | 8.521077273 |  |  |  |  |  |  |

|               |              |           |           |           |            |           |           |             |             |             |             |  |  |  |  |  |  |
|---------------|--------------|-----------|-----------|-----------|------------|-----------|-----------|-------------|-------------|-------------|-------------|--|--|--|--|--|--|
| INSL6         | ILMN_2677859 | 0.6412477 | 0.6050936 | 0.0176684 | 0.9547704  | 0.0058919 | 0.0015237 | 9.453976667 | 9.436828947 | 9.438182353 | 9.34275     |  |  |  |  |  |  |
| TSSC1         | ILMN_2457324 | 0.5346915 | 0.410146  | 0.011202  | 0.1038773  | 0.0344106 | 0.0006812 | 7.696453333 | 7.670657895 | 7.728852941 | 7.585313636 |  |  |  |  |  |  |
| APOM          | ILMN_2769418 | 0.7480536 | 0.1164096 | 0.0016309 | 0.1694297  | 0.001166  | 0.0114258 | 6.10942     | 6.101231579 | 6.071398529 | 5.998286364 |  |  |  |  |  |  |
| BCORL1        | ILMN_2755424 | 0.5064533 | 0.1306181 | 0.0057532 | 0.4880663  | 0.0243868 | 0.0204965 | 6.14217     | 6.119342105 | 6.101613235 | 6.031768182 |  |  |  |  |  |  |
| KAT2B         | ILMN_1215305 | 0.8074212 | 0.6843084 | 0.014961  | 0.0453479  | 0.0025428 | 0.0064719 | 6.576886667 | 6.58595     | 6.563575    | 6.466563636 |  |  |  |  |  |  |
| DPPA1         | ILMN_2656079 | 0.7292075 | 0.963383  | 0.0039038 | 0.7264915  | 0.0030607 | 0.0015125 | 5.75981     | 5.748876316 | 5.758391176 | 5.649590909 |  |  |  |  |  |  |
| LOC675899     | ILMN_1225187 | 0.6992463 | 0.5575826 | 0.0012713 | 0.9400753  | 0.0002217 | 7.695E-07 | 11.88372667 | 11.89631579 | 11.89802353 | 11.77363636 |  |  |  |  |  |  |
| CDH23         | ILMN_1252019 | 0.5014447 | 0.4307809 | 0.0049608 | 0.9860706  | 0.0304386 | 0.0154897 | 5.970186667 | 5.945952632 | 5.945426471 | 5.860313636 |  |  |  |  |  |  |
| LOC384240     | ILMN_1231241 | 0.2925775 | 0.1219751 | 0.0013544 | 0.6701582  | 0.0059351 | 0.0082697 | 5.845473333 | 5.816294737 | 5.807029412 | 5.735695455 |  |  |  |  |  |  |
| PHIP          | ILMN_1234202 | 0.0592684 | 0.3520945 | 0.0352473 | 0.2092254  | 1.647E-05 | 0.0013468 | 8.148903333 | 8.24305     | 8.191986765 | 8.039681818 |  |  |  |  |  |  |
| ZCCHC11       | ILMN_1231967 | 0.7880921 | 0.5355275 | 0.0122213 | 0.7373265  | 0.0118006 | 0.0075116 | 5.953363333 | 5.943892105 | 5.934814706 | 5.844218182 |  |  |  |  |  |  |
| C030004B10RIK | ILMN_1259439 | 0.7356044 | 0.8161726 | 0.0048939 | 0.8086789  | 0.0113031 | 0.0002193 | 5.714183333 | 5.7017      | 5.707923529 | 5.605068182 |  |  |  |  |  |  |
| SH3BP2        | ILMN_1255766 | 0.6289259 | 0.1060738 | 0.0005954 | 0.2239723  | 0.0008508 | 0.0113141 | 10.99547    | 10.98236842 | 10.95497941 | 10.88651364 |  |  |  |  |  |  |
| 9030003C19RIK | ILMN_2556478 | 0.3612766 | 0.2266165 | 0.0017932 | 0.7949485  | 0.012478  | 0.019561  | 6.30629     | 6.278178947 | 6.271342647 | 6.197777273 |  |  |  |  |  |  |
| PTP4A2        | ILMN_2642282 | 0.3416223 | 0.6921419 | 0.0495571 | 0.0973134  | 0.0026303 | 0.0369895 | 8.967936667 | 9.012752632 | 8.951845588 | 8.859495455 |  |  |  |  |  |  |
| B230120H23RIK | ILMN_2595189 | 0.7192865 | 0.7721243 | 0.0055388 | 0.4541691  | 0.0084984 | 0.0005516 | 5.60376     | 5.592065789 | 5.612216176 | 5.495790909 |  |  |  |  |  |  |
| LOC630421     | ILMN_1221849 | 0.0597593 | 0.2054214 | 0.0017667 | 0.409467   | 0.0443924 | 0.0065254 | 6.025783333 | 5.977681579 | 5.995302941 | 5.917995455 |  |  |  |  |  |  |
| MYO5C         | ILMN_1236641 | 0.7752801 | 0.095816  | 0.0021753 | 0.1881018  | 0.0106405 | 0.0488772 | 5.774123333 | 5.765497368 | 5.730282353 | 5.666459091 |  |  |  |  |  |  |
| A130027D22RIK | ILMN_1233685 | 0.2387366 | 0.5718522 | 0.0027726 | 0.4099722  | 0.0154264 | 0.0014254 | 6.198296667 | 6.165173684 | 6.183789706 | 6.090895455 |  |  |  |  |  |  |
| TMPO          | ILMN_1220051 | 0.5256872 | 0.5067008 | 0.0105314 | 0.1571467  | 0.0055601 | 0.0389159 | 8.557416667 | 8.585160526 | 8.533298529 | 8.450218182 |  |  |  |  |  |  |
| HSD3B2        | ILMN_1214838 | 0.3015491 | 0.3966672 | 0.0133709 | 0.8320674  | 0.0276584 | 0.0232042 | 5.771093333 | 5.73905     | 5.744586765 | 5.663945455 |  |  |  |  |  |  |
| NDRG1         | ILMN_1250195 | 0.7393745 | 0.8440065 | 0.0138642 | 0.8707552  | 0.0126874 | 0.0126154 | 7.336333333 | 7.323686842 | 7.329026471 | 7.229204545 |  |  |  |  |  |  |
| RAB4A         | ILMN_1212902 | 0.6265947 | 0.8422009 | 0.0252261 | 0.7357147  | 0.0086563 | 0.0096978 | 6.843623333 | 6.862610526 | 6.850907353 | 6.736786364 |  |  |  |  |  |  |
| RPL32         | ILMN_1232890 | 0.5442472 | 0.2599497 | 5.347E-05 | 0.5956239  | 0.0002718 | 0.0006143 | 13.83211333 | 13.81921842 | 13.80899412 | 13.72541364 |  |  |  |  |  |  |
| A930025D01RIK | ILMN_1223523 | 0.5576374 | 0.6523893 | 0.0140034 | 0.1994279  | 0.0219357 | 0.0003644 | 6.41673     | 6.396328947 | 6.430195588 | 6.310840909 |  |  |  |  |  |  |
| NUFIP2        | ILMN_2498813 | 0.5694042 | 0.1232094 | 0.0029603 | 0.3705824  | 0.0147044 | 0.0303234 | 6.071443333 | 6.053294737 | 6.030458824 | 5.966290909 |  |  |  |  |  |  |
| LOC236831     | ILMN_1253568 | 0.8342139 | 0.4698155 | 0.0014248 | 0.2468924  | 5.101E-05 | 9.813E-05 | 12.44257667 | 12.44817105 | 12.42664118 | 12.33750455 |  |  |  |  |  |  |
| GPR12         | ILMN_1221410 | 0.3734723 | 0.1790159 | 0.0027823 | 0.721614   | 0.0155188 | 0.0178744 | 5.7837      | 5.755857895 | 5.747101471 | 5.679290909 |  |  |  |  |  |  |
| GLRA1         | ILMN_2657254 | 0.1164174 | 0.0615803 | 0.0008728 | 0.7330262  | 0.0218002 | 0.0460066 | 5.690036667 | 5.6508      | 5.643054412 | 5.585631818 |  |  |  |  |  |  |
| TRPM1         | ILMN_3162921 | 0.5179639 | 0.3317461 | 0.0045132 | 0.0694575  | 0.0100765 | 5.237E-05 | 5.68666     | 5.650436842 | 5.694383824 | 5.564486364 |  |  |  |  |  |  |
| MS12          | ILMN_2592174 | 0.6893694 | 0.6094327 | 0.0311427 | 0.9283434  | 0.0061832 | 0.0024893 | 5.971716667 | 5.986276316 | 5.988970588 | 5.867713636 |  |  |  |  |  |  |
| USP47         | ILMN_2455217 | 0.2820285 | 0.0819176 | 0.0014364 | 0.4680971  | 0.0103573 | 0.0483787 | 6.113853333 | 6.0853      | 6.068192647 | 6.010090909 |  |  |  |  |  |  |
| DEFB14        | ILMN_3161733 | 0.215456  | 0.4928357 | 0.0066859 | 0.4878044  | 0.0389184 | 0.0087454 | 5.79444     | 5.758081579 | 5.775191176 | 5.690909091 |  |  |  |  |  |  |
| 1600032L17RIK | ILMN_2524058 | 0.4028161 | 0.6061978 | 0.0061233 | 0.1193815  | 0.0179857 | 0.0002792 | 6.07718     | 6.053210526 | 6.091069118 | 5.97365     |  |  |  |  |  |  |
| HEATR5B       | ILMN_2625626 | 0.574324  | 0.276723  | 0.0046491 | 0.6474795  | 0.01455   | 0.0132789 | 6.279636667 | 6.262047368 | 6.250626471 | 6.176159091 |  |  |  |  |  |  |
| EP400         | ILMN_2575376 | 0.7467958 | 0.2364198 | 0.0061003 | 0.3534152  | 0.0009459 | 2.344E-05 | 5.911806667 | 5.921736842 | 5.944972059 | 5.808472727 |  |  |  |  |  |  |
| C130075H21RIK | ILMN_1217814 | 0.4372626 | 0.8272666 | 0.0029509 | 0.2466091  | 0.0309872 | 0.0004333 | 5.863153333 | 5.838913158 | 5.868792647 | 5.76005     |  |  |  |  |  |  |
| MYB           | ILMN_2683910 | 0.3349069 | 0.6143999 | 0.0060498 | 0.5851071  | 0.0408895 | 0.0095484 | 5.96478     | 5.935865789 | 5.950458824 | 5.861781818 |  |  |  |  |  |  |
| 2810402E24RIK | ILMN_1251628 | 0.1019773 | 0.1865506 | 0.0019535 | 0.6416586  | 0.0311513 | 0.0141334 | 6.330663333 | 6.285539474 | 6.296026471 | 6.227672727 |  |  |  |  |  |  |
| DLGAP2        | ILMN_2937486 | 0.7642321 | 0.7416106 | 0.0200202 | 0.4795674  | 0.0100723 | 0.014501  | 5.728533333 | 5.739528947 | 5.718060294 | 5.625627273 |  |  |  |  |  |  |
| COL23A1       | ILMN_2650447 | 0.7700803 | 0.9975686 | 0.0090815 | 0.7133976  | 0.0005494 | 0.000973  | 7.128406667 | 7.137160526 | 7.128491176 | 7.025504545 |  |  |  |  |  |  |
| FAAH          | ILMN_1233816 | 0.3635331 | 0.0935749 | 0.006972  | 0.4402115  | 0.0206574 | 0.0464402 | 5.98956     | 5.964115789 | 5.946645588 | 5.886959091 |  |  |  |  |  |  |
| DLC1          | ILMN_2648569 | 0.4902596 | 0.5212585 | 0.0257642 | 0.8837077  | 0.0464994 | 0.022319  | 5.824196667 | 5.799747368 | 5.803795588 | 5.721713636 |  |  |  |  |  |  |
| E230016F22RIK | ILMN_2571134 | 0.0980216 | 0.0810981 | 0.0016428 | 0.9918235  | 0.0420266 | 0.0412482 | 5.729066667 | 5.684757895 | 5.684539706 | 5.627031818 |  |  |  |  |  |  |
| 1700073E17RIK | ILMN_2449074 | 0.7104372 | 0.5882121 | 0.0012296 | 0.8795209  | 0.0005211 | 0.0004859 | 5.641803333 | 5.631934211 | 5.628777941 | 5.539877273 |  |  |  |  |  |  |
| MDM2          | ILMN_1250774 | 0.1070369 | 0.1149383 | 0.0015467 | 0.8567834  | 0.0393432 | 0.0273539 | 10.50170333 | 10.45636579 | 10.46051324 | 10.39990909 |  |  |  |  |  |  |
| E530016P10RIK | ILMN_1224376 | 0.2990389 | 0.7400947 | 0.00936   | 0.298036   | 0.0488758 | 0.0016525 | 6.104856667 | 6.070465789 | 6.095805882 | 6.003086364 |  |  |  |  |  |  |
| ZFP212        | ILMN_2521753 | 0.9554209 | 0.6328582 | 0.0128533 | 0.5837145  | 0.0215432 | 0.0014743 | 6.38679     | 6.384781579 | 6.401176471 | 6.285086364 |  |  |  |  |  |  |
| IFI204        | ILMN_2623314 | 0.2394054 | 0.1406812 | 0.0036127 | 0.8595867  | 0.0187063 | 0.0137932 | 5.521196667 | 5.489834211 | 5.486161765 | 5.420104545 |  |  |  |  |  |  |
| TRPV3         | ILMN_2817797 | 0.2402655 | 0.2562584 | 0.0070217 | 0.9649527  | 0.0241875 | 0.0320415 | 5.62817     | 5.598486842 | 5.597452941 | 5.527354545 |  |  |  |  |  |  |
| SEC1          | ILMN_2733335 | 0.7407323 | 0.8997303 | 0.0491737 | 0.7662316  | 0.0375697 | 0.0126434 | 5.754276667 | 5.740523684 | 5.749694118 | 5.653522727 |  |  |  |  |  |  |
| 9330133014RIK | ILMN_2511527 | 0.8767403 | 0.318911  | 0.0196879 | 0.4675145  | 0.048507  | 0.0344143 | 6.23197     | 6.226260526 | 6.205191176 | 6.131222727 |  |  |  |  |  |  |
| GALNT1        | ILMN_2625681 | 0.9714869 | 0.2975368 | 0.0232723 | 0.2390968  | 0.0181203 | 0.0003745 | 7.85888     | 7.857452632 | 7.895080882 | 7.758145455 |  |  |  |  |  |  |
| FOXJ3         | ILMN_2650040 | 0.736441  | 0.4666574 | 0.014201  | 0.17106411 | 0.0127129 | 0.0117895 | 8.670526667 | 8.657994737 | 8.647885294 | 8.569918182 |  |  |  |  |  |  |
| 1810005K13RIK | ILMN_1246137 | 0.4055711 | 0.1510678 | 0.007145  | 0.5801246  | 0.0198345 | 0.033473  | 5.77925     | 5.75325     | 5.740070588 | 5.678704545 |  |  |  |  |  |  |
| CLASP1        | ILMN_1254008 | 0.731198  | 0.5150611 | 0.0017794 | 0.3022383  | 0.0017634 | 0.0230209 | 6.05413     | 6.064752632 | 6.034072059 | 5.95395     |  |  |  |  |  |  |
| 6030408K21RIK | ILMN_1218028 | 0.9050204 | 0.1935505 | 0.0009579 | 0.2122895  | 0.0008454 | 0.0038344 | 5.669393333 | 5.666268421 | 5.640398529 | 5.569368182 |  |  |  |  |  |  |
| A930008A22RIK | ILMN_2423730 | 0.0803392 | 0.6588565 | 0.0074583 | 0.1208183  | 8.172E-06 | 0.0004926 | 8.380963333 | 8.430597368 | 8.393158824 | 8.281059091 |  |  |  |  |  |  |
| 1810007M14RIK | ILMN_2681311 | 0.9867738 | 0.3264536 | 0.0153026 | 0.2792479  | 0.0105098 | 0.0498006 | 6.890543333 | 6.891115789 | 6.859664706 | 6.790654545 |  |  |  |  |  |  |
| BC003331      | ILMN_2719794 | 0.254712  | 0.5875327 | 0.0120195 | 0.5413595  | 0.0224451 | 0.0181672 | 7.384963333 | 7.351997368 | 7.367855882 | 7.285531818 |  |  |  |  |  |  |

|                  |              |           |           |           |           |           |           |             |             |             |             |  |  |  |  |
|------------------|--------------|-----------|-----------|-----------|-----------|-----------|-----------|-------------|-------------|-------------|-------------|--|--|--|--|
| LOC382061        | ILMN_1245034 | 0.9446984 | 0.3669927 | 0.0214387 | 0.351454  | 0.0090476 | 0.0014338 | 10.37113    | 10.37368684 | 10.40468824 | 10.27182273 |  |  |  |  |
| NAT12            | ILMN_2623754 | 0.7368378 | 0.1485143 | 0.0155508 | 0.2500962 | 0.0144701 | 0.0293627 | 8.314633333 | 8.302757895 | 8.275223529 | 8.215740909 |  |  |  |  |
| OLFR782          | ILMN_3161983 | 0.4504481 | 0.9262584 | 0.0059004 | 0.2714201 | 0.0111752 | 0.0002495 | 5.737763333 | 5.716676316 | 5.74        | 5.639059091 |  |  |  |  |
| CPEB2            | ILMN_1236346 | 0.754902  | 0.7192569 | 0.0028115 | 0.4630443 | 0.0006974 | 0.0044823 | 5.658066667 | 5.666544737 | 5.648361765 | 5.559427273 |  |  |  |  |
| 251004919RIK     | ILMN_2778799 | 0.9146496 | 0.4162817 | 0.0081101 | 0.4380233 | 0.0055305 | 0.0264759 | 6.335453333 | 6.332197368 | 6.311452941 | 6.236859091 |  |  |  |  |
| LCN3             | ILMN_1236379 | 0.3962847 | 0.4056312 | 0.0085751 | 0.9270237 | 0.038493  | 0.0271877 | 5.884476667 | 5.856815789 | 5.859325    | 5.786277273 |  |  |  |  |
| 9930021J03RIK    | ILMN_2626694 | 0.8473104 | 0.4195328 | 0.0096859 | 0.2816464 | 0.0050583 | 0.0227078 | 5.63169     | 5.637307895 | 5.609635294 | 5.53385     |  |  |  |  |
| LOC268939        | ILMN_1215666 | 0.9716605 | 0.2374067 | 0.0104938 | 0.1445345 | 0.0009112 | 0.0418775 | 6.025216667 | 6.026355263 | 5.989661765 | 5.928159091 |  |  |  |  |
| IGHV14S3_X03573  | ILMN_2453303 | 0.2247471 | 0.1772146 | 0.0113145 | 0.9609478 | 9.704E-05 | 1.92E-05  | 6.005066667 | 6.045584211 | 6.044322059 | 5.908227273 |  |  |  |  |
| 4930524L23RIK    | ILMN_2610591 | 0.9763316 | 0.4440562 | 0.0031664 | 0.4414658 | 0.00327   | 0.0050724 | 5.51084     | 5.509984211 | 5.492057353 | 5.414113636 |  |  |  |  |
| NANP             | ILMN_2629922 | 0.4439226 | 0.3354253 | 0.0027216 | 0.8669722 | 0.0134795 | 0.0132829 | 5.710083333 | 5.689892105 | 5.685992647 | 5.613513636 |  |  |  |  |
| PCSK2            | ILMN_1244247 | 0.9827126 | 0.5580062 | 0.0171803 | 0.5454144 | 0.0122208 | 0.0150089 | 5.669273333 | 5.668607895 | 5.653467647 | 5.572977273 |  |  |  |  |
| C87414           | ILMN_1243166 | 0.8301125 | 0.5806195 | 0.0205123 | 0.3878184 | 0.004923  | 0.0367684 | 5.990493333 | 5.997397368 | 5.972451471 | 5.8942      |  |  |  |  |
| TMEFF2           | ILMN_2518100 | 0.5540378 | 0.307364  | 0.0054996 | 0.6778876 | 0.0212317 | 0.0347081 | 5.677973333 | 5.660439474 | 5.649566176 | 5.581804545 |  |  |  |  |
| MIA3             | ILMN_2600646 | 0.8629119 | 0.5002241 | 0.0100169 | 0.619891  | 0.0060729 | 0.0003258 | 5.843996667 | 5.849473684 | 5.862173529 | 5.747836364 |  |  |  |  |
| EG546913         | ILMN_2531690 | 0.8300353 | 0.834077  | 0.0010234 | 0.9661145 | 0.0006485 | 0.0001001 | 5.761706667 | 5.767334211 | 5.766423529 | 5.665590909 |  |  |  |  |
| A630040J04RIK    | ILMN_1252015 | 0.4837888 | 0.87064   | 0.003201  | 0.5272259 | 0.0004243 | 0.0008928 | 5.993063333 | 6.012613158 | 5.997267647 | 5.897040909 |  |  |  |  |
| HARS             | ILMN_2769030 | 0.4861468 | 0.3140142 | 0.0113082 | 0.8091924 | 0.0132759 | 0.0117812 | 6.238436667 | 6.216931579 | 6.211557353 | 6.142640909 |  |  |  |  |
| HRK              | ILMN_1229407 | 0.2096328 | 0.1223179 | 0.0028847 | 0.8953488 | 0.0322491 | 0.0274662 | 5.75883     | 5.723236842 | 5.720327941 | 5.6631      |  |  |  |  |
| LOC100045437     | ILMN_1228865 | 0.7505552 | 0.926885  | 0.0100705 | 0.7929019 | 0.0077785 | 0.0061808 | 5.742806667 | 5.732802632 | 5.739961765 | 5.647127273 |  |  |  |  |
| AFMID            | ILMN_2702894 | 0.7349138 | 0.5055376 | 0.0152111 | 0.7727553 | 0.0480428 | 0.0461388 | 6.246823333 | 6.234655263 | 6.225633824 | 6.151559091 |  |  |  |  |
| PMS1             | ILMN_1250517 | 0.6367352 | 0.7197332 | 0.0222742 | 0.8956758 | 0.023488  | 0.0225456 | 5.817356667 | 5.801978947 | 5.805682353 | 5.722281818 |  |  |  |  |
| ID2              | ILMN_2887239 | 0.8702895 | 0.4751141 | 0.0279837 | 0.5421713 | 0.0158696 | 0.0431245 | 6.11898     | 6.112697368 | 6.094567647 | 6.024290909 |  |  |  |  |
| FABP2            | ILMN_2706493 | 0.8033747 | 0.7866504 | 0.0134488 | 0.9845572 | 0.0017729 | 0.0017791 | 5.574673333 | 5.581957895 | 5.582427941 | 5.48005     |  |  |  |  |
| ATG12            | ILMN_2663570 | 0.2765947 | 0.6693377 | 0.0022197 | 0.4153576 | 0.0299606 | 0.0036453 | 8.973293333 | 8.94255     | 8.962186765 | 8.87895     |  |  |  |  |
| FBXW13           | ILMN_2625152 | 0.5506756 | 0.6042237 | 0.0143692 | 0.8820256 | 0.037303  | 0.0150896 | 5.958916667 | 5.941       | 5.944770588 | 5.864777273 |  |  |  |  |
| TDH              | ILMN_1244724 | 0.2991268 | 0.2202766 | 0.001097  | 0.8646909 | 0.0280882 | 0.037229  | 5.632846667 | 5.605236842 | 5.600979412 | 5.538713636 |  |  |  |  |
| CALCRL           | ILMN_1235390 | 0.6192884 | 0.959516  | 0.0388553 | 0.5187058 | 0.0344821 | 0.0042841 | 5.57102     | 5.552502632 | 5.569420588 | 5.476895455 |  |  |  |  |
| IL1F9            | ILMN_2658704 | 0.9599679 | 0.362586  | 0.0027602 | 0.326151  | 0.004563  | 0.0107344 | 5.66582     | 5.667273684 | 5.643604412 | 5.571768182 |  |  |  |  |
| SYT10            | ILMN_2724250 | 0.367285  | 0.7220084 | 0.0144716 | 0.4300129 | 0.0404325 | 0.0041577 | 5.726353333 | 5.6979      | 5.716591176 | 5.632418182 |  |  |  |  |
| MEX3A            | ILMN_2479681 | 0.3380093 | 0.6957226 | 0.0209027 | 0.4889153 | 0.0224868 | 0.0151692 | 6.931541379 | 6.896444737 | 6.913239706 | 6.837772727 |  |  |  |  |
| PRICKLE2         | ILMN_3015864 | 0.8467823 | 0.7874096 | 0.0209157 | 0.9691369 | 0.0147291 | 0.0034501 | 5.850416667 | 5.857647368 | 5.858801471 | 5.756763636 |  |  |  |  |
| 5830415L20RIK    | ILMN_1257675 | 0.976909  | 0.9407398 | 0.0148166 | 0.9090173 | 0.0213148 | 0.0025673 | 7.799203333 | 7.800326316 | 7.79705     | 7.705868182 |  |  |  |  |
| GAPVD1           | ILMN_1238871 | 0.6367536 | 0.1355577 | 0.0054484 | 0.2719336 | 0.0050197 | 0.029116  | 9.875493333 | 9.862042105 | 9.838317647 | 9.782222727 |  |  |  |  |
| LOC381770        | ILMN_2539337 | 0.4275937 | 0.7376624 | 0.0151302 | 0.5639629 | 0.0383306 | 0.0148801 | 6.123156667 | 6.095863158 | 6.112223529 | 6.03        |  |  |  |  |
| TATDN3           | ILMN_2647204 | 0.7744865 | 0.2357237 | 0.0013057 | 0.2930066 | 0.0004448 | 0.0243529 | 5.724313333 | 5.717452632 | 5.693994118 | 5.631331818 |  |  |  |  |
| KRT32            | ILMN_2895346 | 0.8325026 | 0.5156987 | 0.0065035 | 0.639505  | 0.0011419 | 0.0001087 | 5.993876667 | 5.999742105 | 6.010070588 | 5.901004545 |  |  |  |  |
| LRRC18           | ILMN_2728504 | 0.8949315 | 0.5910011 | 0.005234  | 0.6690196 | 0.003179  | 0.0007924 | 5.526923333 | 5.530942105 | 5.542358824 | 5.434140909 |  |  |  |  |
| NIN              | ILMN_2778195 | 0.6803254 | 0.9897238 | 0.0093726 | 0.5882718 | 0.0017088 | 0.0014083 | 8.5343      | 8.546615789 | 8.533970588 | 8.442313636 |  |  |  |  |
| 5830411J07RIK    | ILMN_2679267 | 0.9168752 | 0.5707688 | 0.0080081 | 0.6350218 | 0.0095103 | 0.0108144 | 5.85217     | 5.849081579 | 5.837338235 | 5.760313636 |  |  |  |  |
| EEFSEC           | ILMN_2587281 | 0.7897267 | 0.9248816 | 0.0102229 | 0.6720642 | 0.0051822 | 0.0032708 | 5.65683     | 5.664715789 | 5.654432353 | 5.565031818 |  |  |  |  |
| SPDYB            | ILMN_2756787 | 0.4188197 | 0.3298557 | 0.0127321 | 0.9302795 | 0.0425628 | 0.0364783 | 5.668073333 | 5.642892105 | 5.640694118 | 5.576868182 |  |  |  |  |
| RNF150           | ILMN_3032501 | 0.1040409 | 0.2494973 | 0.0228449 | 0.3483212 | 8.548E-05 | 7.229E-05 | 5.896763333 | 5.955207895 | 5.930469118 | 5.805768182 |  |  |  |  |
| SYNGR4           | ILMN_3070294 | 0.5860337 | 0.7467844 | 0.0167894 | 0.7784429 | 0.0481033 | 0.0195099 | 5.656433333 | 5.638892105 | 5.646776471 | 5.565595455 |  |  |  |  |
| 6030408B16RIK    | ILMN_3125764 | 0.3754552 | 0.3898573 | 0.0040291 | 0.8844397 | 0.036486  | 0.0149594 | 6.25216     | 6.227231579 | 6.230682353 | 6.161786364 |  |  |  |  |
| C130039E17RIK    | ILMN_2494727 | 0.2570242 | 0.9444619 | 0.0074785 | 0.1965718 | 0.0186735 | 0.0012731 | 5.731136667 | 5.703355263 | 5.729467647 | 5.640990909 |  |  |  |  |
| KRIT1            | ILMN_2701155 | 0.2975452 | 0.1242828 | 0.0152567 | 0.6635597 | 0.0009445 | 8.52E-05  | 5.64008     | 5.672247368 | 5.683764706 | 5.549959091 |  |  |  |  |
| control_ILMN_137 | ILMN_1378774 | 0.9307556 | 0.2861095 | 0.0362832 | 0.2053394 | 0.0299291 | 0.0019757 | 5.669826667 | 5.666792105 | 5.707342647 | 5.580013636 |  |  |  |  |
| PAPPA            | ILMN_2630646 | 0.3757235 | 0.2469496 | 0.0127078 | 0.7949767 | 0.0313073 | 0.0437685 | 5.948626667 | 5.924163158 | 5.918261765 | 5.858904545 |  |  |  |  |
| 1700016L04RIK    | ILMN_2499229 | 0.9068536 | 0.3496515 | 0.003728  | 0.2877742 | 0.0068198 | 0.0356119 | 5.716706667 | 5.719863158 | 5.692752941 | 5.627036364 |  |  |  |  |
| C130072C03RIK    | ILMN_1233936 | 0.8083855 | 0.8398444 | 0.0117163 | 0.6209926 | 0.004497  | 0.0141431 | 6.081323333 | 6.089007895 | 6.075160294 | 5.992027273 |  |  |  |  |
| OLFR564          | ILMN_2771303 | 0.6059235 | 0.3617566 | 0.0038621 | 0.7522095 | 0.0085074 | 0.0036343 | 5.610586667 | 5.597744737 | 5.591648529 | 5.521359091 |  |  |  |  |
| 1700016G05RIK    | ILMN_2637903 | 0.7065492 | 0.586252  | 0.0380929 | 0.8980731 | 0.0087043 | 0.0024676 | 5.763153333 | 5.776560526 | 5.780139706 | 5.674022727 |  |  |  |  |
| RgenericRIP1     | ILMN_2681694 | 0.5272695 | 0.4436967 | 0.0030417 | 0.9475417 | 0.0227677 | 0.0158192 | 5.954443333 | 5.936397368 | 5.934783824 | 5.865727273 |  |  |  |  |
| K20D4            | ILMN_1240743 | 0.9620794 | 0.4376337 | 0.0016224 | 0.3884916 | 0.0019114 | 0.0055894 | 5.705186667 | 5.706357895 | 5.688022059 | 5.616690909 |  |  |  |  |
| 4922502D21RIK    | ILMN_2593944 | 0.4155873 | 0.2608502 | 0.0014164 | 0.8094367 | 0.0287873 | 0.0357882 | 5.802656667 | 5.779581579 | 5.773558824 | 5.714322727 |  |  |  |  |
| GM949            | ILMN_2531100 | 0.7554924 | 0.5739886 | 0.0258405 | 0.812046  | 0.0276837 | 0.025157  | 5.67855     | 5.668557895 | 5.662460294 | 5.590413636 |  |  |  |  |
| DLG4             | ILMN_2710764 | 0.8894548 | 0.6313459 | 0.0098786 | 0.719497  | 0.0092212 | 0.0139952 | 6.05743     | 6.053318421 | 6.044314706 | 5.969368182 |  |  |  |  |
| PTPN22           | ILMN_2766313 | 0.8914719 | 0.3978819 | 0.0059982 | 0.2959911 | 0.0071583 | 0.0002047 | 5.784923333 | 5.781565789 | 5.804307353 | 5.697240909 |  |  |  |  |
| MED1             | ILMN_2695175 | 0.6978466 | 0.3155412 | 0.0061145 | 0.5136009 | 0.0126153 | 0.0489572 | 5.69954     | 5.688523684 | 5.672022059 | 5.612195455 |  |  |  |  |

|               |              |           |           |           |           |           |           |             |             |             |             |         |  |  |  |  |  |
|---------------|--------------|-----------|-----------|-----------|-----------|-----------|-----------|-------------|-------------|-------------|-------------|---------|--|--|--|--|--|
| HPN           | ILMN_1240252 | 0.7037546 | 0.8400336 | 0.0251248 | 0.4693431 | 0.011654  | 0.0031729 | 5.78737     | 5.775389474 | 5.793452941 | 5.700045455 |         |  |  |  |  |  |
| USP47         | ILMN_1256774 | 0.8866563 | 0.0842761 | 0.0014934 | 0.0608501 | 0.0099391 | 2.783E-05 | 6.331733333 | 6.327818421 | 6.377101471 | 6.24445     |         |  |  |  |  |  |
| CTD5PL2       | ILMN_3154869 | 0.8735733 | 0.4599275 | 0.0147125 | 0.5616849 | 0.0151192 | 0.0017049 | 6.688386667 | 6.693771053 | 6.710814706 | 6.601177273 |         |  |  |  |  |  |
| PARP11        | ILMN_1221241 | 0.8903692 | 0.6638582 | 0.0011354 | 0.5632186 | 0.0047832 | 0.0101482 | 5.620256667 | 5.624031579 | 5.609260294 | 5.533118182 |         |  |  |  |  |  |
| LOC381561     | ILMN_2536925 | 0.1723748 | 0.216863  | 0.0075951 | 0.6464934 | 0.0439059 | 0.0093054 | 0.0093054   | 13.19958667 | 13.16311842 | 13.17164853 | 13.1126 |  |  |  |  |  |
| V1RD9         | ILMN_2959825 | 0.9788191 | 0.1317526 | 0.0069015 | 0.0979927 | 0.0057014 | 5.894E-06 | 5.658806667 | 5.657992105 | 5.697108824 | 5.572222727 |         |  |  |  |  |  |
| SPN           | ILMN_1255969 | 0.5596473 | 0.7111714 | 0.0075162 | 0.8578705 | 0.0095021 | 0.0137105 | 5.89838     | 5.884368421 | 5.888555882 | 5.811963636 |         |  |  |  |  |  |
| CKNK4         | ILMN_2625370 | 0.6927491 | 0.8658761 | 0.0447239 | 0.5016589 | 0.0064063 | 0.025991  | 5.664273333 | 5.677852632 | 5.658711765 | 5.577881818 |         |  |  |  |  |  |
| PAX6          | ILMN_2504978 | 0.6902548 | 0.2519094 | 0.0135426 | 0.0834441 | 0.0035471 | 0.0395486 | 5.669473333 | 5.681165789 | 5.640964706 | 5.583190909 |         |  |  |  |  |  |
| COP33         | ILMN_1218678 | 0.5169321 | 0.6368832 | 0.0237309 | 0.2024763 | 0.0050189 | 0.0265416 | 6.04268     | 6.063476316 | 6.029414706 | 5.956536364 |         |  |  |  |  |  |
| OLFR894       | ILMN_2631775 | 0.5583272 | 0.9984709 | 0.0439596 | 0.4213578 | 0.0033098 | 0.0079279 | 5.7664      | 5.789839474 | 5.766469118 | 5.6803      |         |  |  |  |  |  |
| 9530053H22    | ILMN_2617639 | 0.4188925 | 0.3540549 | 0.0035781 | 0.054257  | 0.0003069 | 0.011957  | 5.551996667 | 5.571878947 | 5.531242647 | 5.465995455 |         |  |  |  |  |  |
| 5830472H07RIK | ILMN_2755293 | 0.3650164 | 0.6660751 | 0.0204663 | 0.1182634 | 0.0003978 | 0.0274633 | 6.253593333 | 6.282686842 | 6.240239706 | 6.167636364 |         |  |  |  |  |  |
| D930007M19RIK | ILMN_2581178 | 0.7633954 | 0.6060461 | 0.0224101 | 0.335377  | 0.0045154 | 0.0172931 | 6.347126667 | 6.356386842 | 6.333030882 | 6.261340909 |         |  |  |  |  |  |
| D130078K04RIK | ILMN_2569683 | 0.6663672 | 0.2573497 | 0.0413511 | 0.0513247 | 0.028787  | 0.0001493 | 5.92102     | 5.905407895 | 5.957402941 | 5.835468182 |         |  |  |  |  |  |
| LOC384287     | ILMN_1226110 | 0.5438828 | 0.5814111 | 0.0033333 | 0.1920168 | 0.0174853 | 0.0001765 | 5.600046667 | 5.584278947 | 5.612377941 | 5.514790909 |         |  |  |  |  |  |
| LOC100048049  | ILMN_2708610 | 0.9521813 | 0.2559068 | 0.011481  | 0.2112315 | 0.0108032 | 0.0493348 | 5.83809     | 5.839768421 | 5.810255882 | 5.752986364 |         |  |  |  |  |  |
| 1700112H15RIK | ILMN_2743541 | 0.6486149 | 0.3201502 | 0.0108812 | 0.1093398 | 0.0211543 | 0.0002793 | 5.602223333 | 5.589636842 | 5.628055882 | 5.517240909 |         |  |  |  |  |  |
| RNF17         | ILMN_2741929 | 0.7134597 | 0.3039073 | 0.0055782 | 0.1747023 | 0.0115691 | 0.0273409 | 5.560576667 | 5.571157895 | 5.537982353 | 5.475609091 |         |  |  |  |  |  |
| NARF          | ILMN_1244845 | 0.3281369 | 0.0721462 | 0.0176127 | 0.4176605 | 0.0027905 | 0.0001596 | 7.168896667 | 7.19995     | 7.223792647 | 7.084013636 |         |  |  |  |  |  |
| HSPA1B        | ILMN_2530672 | 0.771466  | 0.9805427 | 0.0373104 | 0.7019187 | 0.0198453 | 0.017804  | 5.990493333 | 6.0012      | 5.989733824 | 5.905659091 |         |  |  |  |  |  |
| B930071N01RIK | ILMN_1247868 | 0.9632328 | 0.6442669 | 0.0062749 | 0.6522583 | 0.0040953 | 0.0014718 | 5.752686667 | 5.753815789 | 5.764302941 | 5.668054545 |         |  |  |  |  |  |
| SEMA3E        | ILMN_1228525 | 0.6303928 | 0.3243436 | 0.00681   | 0.6054607 | 0.0058388 | 0.0090843 | 5.622603333 | 5.610747368 | 5.600951471 | 5.538277273 |         |  |  |  |  |  |
| NALNT6        | ILMN_2627386 | 0.8144688 | 0.7918429 | 0.0284545 | 0.5404713 | 0.0260369 | 0.0019673 | 5.865516667 | 5.875652632 | 5.872851471 | 5.781409091 |         |  |  |  |  |  |
| GC0A2         | ILMN_2573793 | 0.8386801 | 0.9791901 | 0.0473111 | 0.8113465 | 0.0387878 | 0.0101734 | 5.96424     | 5.957523684 | 5.963505882 | 5.880186364 |         |  |  |  |  |  |
| LOC385027     | ILMN_1255900 | 0.6575389 | 0.4828937 | 0.0095649 | 0.2241955 | 0.0282209 | 0.0016544 | 5.646326667 | 5.633852632 | 5.665861765 | 5.562377273 |         |  |  |  |  |  |
| SPRR2K        | ILMN_2990390 | 0.4610699 | 0.1988329 | 0.0202078 | 0.5001156 | 0.0007792 | 0.000363  | 5.623606667 | 5.644615789 | 5.662151471 | 5.539818182 |         |  |  |  |  |  |
| STAT4         | ILMN_2752599 | 0.9033132 | 0.9223381 | 0.0125316 | 0.814329  | 0.0093633 | 0.0156657 | 5.838816667 | 5.842352632 | 5.836001471 | 5.755045455 |         |  |  |  |  |  |
| 1700006H02RIK | ILMN_1253202 | 0.7195873 | 0.4958858 | 0.0043993 | 0.7777704 | 0.0214114 | 0.0199032 | 5.87839     | 5.868286842 | 5.861352941 | 5.794681818 |         |  |  |  |  |  |
| OLFR463       | ILMN_2702643 | 0.941253  | 0.9542228 | 0.0460991 | 0.8736715 | 0.0244688 | 0.0162632 | 5.806456667 | 5.809223684 | 5.804622059 | 5.722768182 |         |  |  |  |  |  |
| LOC637082     | ILMN_1233896 | 0.9775942 | 0.7745997 | 0.0244268 | 0.7222327 | 0.0133239 | 0.0034332 | 5.796636667 | 5.795723684 | 5.804989706 | 5.71272727  |         |  |  |  |  |  |
| CHMP7         | ILMN_2588610 | 0.7259657 | 0.6457792 | 0.0163974 | 0.9779851 | 0.0047052 | 0.0004421 | 9.48094     | 9.490673684 | 9.491242647 | 9.397440909 |         |  |  |  |  |  |
| AGPAT5        | ILMN_1250939 | 0.9614614 | 0.5703106 | 0.0238288 | 0.574637  | 0.0157558 | 0.0166591 | 5.9402      | 5.938721053 | 5.925610294 | 5.856831818 |         |  |  |  |  |  |
| GRIN3         | ILMN_2722319 | 0.7193688 | 0.409426  | 0.0162081 | 0.1731738 | 0.0048228 | 0.0223676 | 5.649423333 | 5.661078947 | 5.627986795 | 5.566109091 |         |  |  |  |  |  |
| R3HDM1        | ILMN_2759868 | 0.5127528 | 0.8274176 | 0.0139212 | 0.3080578 | 0.043072  | 0.0024589 | 6.22318     | 6.204939474 | 6.228605882 | 6.140118182 |         |  |  |  |  |  |
| GM239         | ILMN_2814357 | 0.8564432 | 0.3607762 | 0.0107896 | 0.2673967 | 0.0125712 | 0.0213908 | 5.75041     | 5.755331579 | 5.730616176 | 5.667736364 |         |  |  |  |  |  |
| genericC      | ILMN_2606088 | 0.3693444 | 0.1421332 | 0.0063459 | 0.6205897 | 0.0007251 | 4.249E-05 | 5.638906667 | 5.663857895 | 5.675654412 | 5.556236364 |         |  |  |  |  |  |
| GUCY2C        | ILMN_2751551 | 0.9311439 | 0.6791989 | 0.0266953 | 0.727426  | 0.0192255 | 0.0190927 | 5.75101     | 5.748381579 | 5.739895588 | 5.668413636 |         |  |  |  |  |  |
| DNAJC28       | ILMN_2592571 | 0.7952743 | 0.9228959 | 0.0229884 | 0.6610701 | 0.006099  | 0.0044932 | 5.995306667 | 5.987768421 | 5.998058824 | 5.912995455 |         |  |  |  |  |  |
| A630057J21RIK | ILMN_1222357 | 0.2314964 | 0.6982961 | 0.0121469 | 0.0568623 | 0.0004558 | 0.0115815 | 5.72068     | 5.759102632 | 5.710363235 | 5.638481818 |         |  |  |  |  |  |
| PKD2          | ILMN_2737658 | 0.9107416 | 0.6160621 | 0.0448763 | 0.491808  | 0.0248585 | 0.0440472 | 5.95138     | 5.955163158 | 5.936645588 | 5.869513636 |         |  |  |  |  |  |
| 1110032A03RIK | ILMN_1215043 | 0.6042382 | 0.7715371 | 0.0053992 | 0.7763488 | 0.0169362 | 0.0057653 | 5.859373333 | 5.846365789 | 5.852595588 | 5.777881818 |         |  |  |  |  |  |
| 2310016E02RIK | ILMN_1254063 | 0.7048363 | 0.6541008 | 0.0108308 | 0.9525587 | 0.0146772 | 0.0200185 | 5.7544      | 5.743484211 | 5.742011765 | 5.672968182 |         |  |  |  |  |  |
| C330011J12RIK | ILMN_2615978 | 0.8586984 | 0.9201107 | 0.0156124 | 0.7486874 | 0.0019331 | 0.0052056 | 5.719083333 | 5.714607895 | 5.721825    | 5.637795455 |         |  |  |  |  |  |
| JRKL          | ILMN_1255837 | 0.9427248 | 0.8029279 | 0.0412463 | 0.8452461 | 0.023158  | 0.0194457 | 5.823186667 | 5.821102632 | 5.816498529 | 5.741981818 |         |  |  |  |  |  |
| ZFP120        | ILMN_2456317 | 0.8626171 | 0.8674089 | 0.0107547 | 0.9891192 | 0.0092609 | 0.0063626 | 5.540176667 | 5.535910526 | 5.536211765 | 5.459018182 |         |  |  |  |  |  |
| KISS1         | ILMN_2735829 | 0.7658177 | 0.2161865 | 0.007277  | 0.1117005 | 0.0202354 | 0.0001909 | 5.697123333 | 5.689555263 | 5.726642647 | 5.6162      |         |  |  |  |  |  |
| RTN3          | ILMN_2572492 | 0.5310507 | 0.7196946 | 0.0224205 | 0.7369927 | 0.0375872 | 0.019464  | 5.90647     | 5.888605263 | 5.896657353 | 5.825581818 |         |  |  |  |  |  |
| AW822252      | ILMN_2744956 | 0.9110759 | 0.6628267 | 0.0259589 | 0.4876944 | 0.0014865 | 0.0119086 | 5.76074     | 5.763905263 | 5.74905     | 5.679863636 |         |  |  |  |  |  |
| LRR39         | ILMN_1230043 | 0.7845283 | 0.8889288 | 0.0136074 | 0.8897264 | 0.0015873 | 0.00431   | 5.708436667 | 5.715042105 | 5.711988235 | 5.627659091 |         |  |  |  |  |  |
| SCNN1B        | ILMN_2618383 | 0.8982054 | 0.8224606 | 0.0343777 | 0.668188  | 0.0192109 | 0.0030956 | 5.610303333 | 5.606213158 | 5.616464706 | 5.529563636 |         |  |  |  |  |  |
| DLX6          | ILMN_1213404 | 0.9865922 | 0.6995028 | 0.0138319 | 0.6976892 | 0.0132859 | 0.0016274 | 5.75542     | 5.755936842 | 5.765739706 | 5.674818182 |         |  |  |  |  |  |
| GM438         | ILMN_1248574 | 0.2999972 | 0.5505015 | 0.0105011 | 0.6519213 | 0.0408515 | 0.0249861 | 5.745906667 | 5.720597368 | 5.730714706 | 5.665440909 |         |  |  |  |  |  |
| LOC236397     | ILMN_1239998 | 0.6819703 | 0.8225891 | 0.0234194 | 0.4609324 | 0.0237734 | 0.0055854 | 5.832173333 | 5.820278947 | 5.838497059 | 5.751754545 |         |  |  |  |  |  |
| LOC381448     | ILMN_2528515 | 0.7862356 | 0.3355951 | 0.0078061 | 0.517919  | 0.0070339 | 0.000228  | 12.88779333 | 12.89468947 | 12.89075882 | 12.80749091 |         |  |  |  |  |  |
| CCDC104       | ILMN_2643580 | 0.5512377 | 0.7068019 | 0.0074226 | 0.2389928 | 0.0024549 | 0.0036015 | 5.84063     | 5.859457895 | 5.831667647 | 5.760527273 |         |  |  |  |  |  |
| LOC279638     | ILMN_2588075 | 0.6434951 | 0.8289066 | 0.0190066 | 0.4385002 | 0.0044609 | 0.0166612 | 6.0283      | 6.041955263 | 6.022392647 | 5.948613636 |         |  |  |  |  |  |
| MADD          | ILMN_1256376 | 0.8841383 | 0.5873814 | 0.0049344 | 0.6978806 | 0.0174898 | 0.0249892 | 5.59808     | 5.593768421 | 5.583701471 | 5.518418182 |         |  |  |  |  |  |
| LOC333749     | ILMN_2530361 | 0.9961254 | 0.9454999 | 0.0089106 | 0.9434147 | 0.019264  | 0.0087053 | 5.940406667 | 5.940531579 | 5.938926471 | 5.860786364 |         |  |  |  |  |  |
| AGT           | ILMN_1227398 | 0.9838994 | 0.7108285 | 0.0317634 | 0.6822639 | 0.0310015 | 0.0379501 | 5.643776667 | 5.644352632 | 5.633804412 | 5.564418182 |         |  |  |  |  |  |

|                  |              |           |           |           |           |           |           |             |             |             |             |  |  |  |  |  |  |
|------------------|--------------|-----------|-----------|-----------|-----------|-----------|-----------|-------------|-------------|-------------|-------------|--|--|--|--|--|--|
| C77370           | ILMN_1218340 | 0.6355803 | 0.745389  | 0.0080885 | 0.3593414 | 0.0033986 | 0.0044323 | 5.701306667 | 5.713702632 | 5.694325    | 5.621972727 |  |  |  |  |  |  |
| LOC382454        | ILMN_1255829 | 0.9658817 | 0.7377271 | 0.0151115 | 0.7577817 | 0.0169871 | 0.0263888 | 5.770946667 | 5.769571053 | 5.761170588 | 5.692477273 |  |  |  |  |  |  |
| 9130601C02RIK    | ILMN_1216153 | 0.4110089 | 0.9474412 | 0.0052086 | 0.2671637 | 0.0448125 | 0.0007918 | 5.722513333 | 5.701268421 | 5.723889706 | 5.644172727 |  |  |  |  |  |  |
| B230216G23RIK    | ILMN_2481643 | 0.5738403 | 0.4818068 | 0.0061084 | 0.1632362 | 0.0005697 | 0.0262431 | 5.642603333 | 5.6564      | 5.625255882 | 5.56435     |  |  |  |  |  |  |
| BMPR1B           | ILMN_1219486 | 0.4614593 | 0.6682267 | 0.013751  | 0.6987948 | 0.0050068 | 0.0054518 | 5.720253333 | 5.742613158 | 5.732064706 | 5.642009091 |  |  |  |  |  |  |
| LOC100046568     | ILMN_1258903 | 0.3199598 | 0.565766  | 0.0457105 | 0.5006254 | 0.0056304 | 0.0043152 | 5.87139     | 5.907021053 | 5.888016176 | 5.793381818 |  |  |  |  |  |  |
| A130003P22RIK    | ILMN_1257646 | 0.7124793 | 0.8219187 | 0.0033766 | 0.8525193 | 0.0043866 | 0.0021054 | 6.037656667 | 6.046863158 | 6.042676471 | 5.959827273 |  |  |  |  |  |  |
| CF12             | ILMN_1249976 | 0.6912082 | 0.4701812 | 0.0194689 | 0.7779825 | 0.0435501 | 0.0357747 | 6.263776667 | 6.252907895 | 6.246395588 | 6.18595     |  |  |  |  |  |  |
| control_ILMN_137 | ILMN_1378775 | 0.2449939 | 0.2632084 | 0.032902  | 0.8118056 | 0.0016482 | 0.0006335 | 5.630993333 | 5.667786842 | 5.661682353 | 5.553213636 |  |  |  |  |  |  |
| TCFAP2C          | ILMN_2783225 | 0.7620181 | 0.9408748 | 0.0280774 | 0.8084718 | 0.0113623 | 0.0264556 | 5.818516667 | 5.827960526 | 5.820864706 | 5.740859091 |  |  |  |  |  |  |
| BHLHB3           | ILMN_2759227 | 0.5982206 | 0.9068422 | 0.0145963 | 0.4665519 | 0.0252029 | 0.0041333 | 5.618706667 | 5.606023684 | 5.621429412 | 5.541054545 |  |  |  |  |  |  |
| UGDH             | ILMN_1253090 | 0.8063706 | 0.9199699 | 0.0085069 | 0.866032  | 0.0213414 | 0.0094823 | 5.862666667 | 5.856173684 | 5.860194118 | 5.78535     |  |  |  |  |  |  |
| control_ILMN_137 | ILMN_1379205 | 0.7602591 | 0.9819625 | 0.0237431 | 0.7182357 | 0.0403374 | 0.014538  | 5.71972     | 5.711386842 | 5.720311765 | 5.642781818 |  |  |  |  |  |  |
| CRLF1            | ILMN_2747811 | 0.7979725 | 0.2898963 | 0.002394  | 0.1858294 | 0.0073264 | 0.039054  | 5.672033333 | 5.679189474 | 5.647736765 | 5.595127273 |  |  |  |  |  |  |
| SOX2             | ILMN_1248711 | 0.77498   | 0.6449247 | 0.0219339 | 0.8646521 | 0.0241069 | 0.0305053 | 5.68709     | 5.678613158 | 5.674401471 | 5.610327273 |  |  |  |  |  |  |
| LOC229152        | ILMN_1240991 | 0.7580748 | 0.5264719 | 0.0070411 | 0.8449809 | 0.0341744 | 0.0058696 | 5.61709     | 5.608715789 | 5.604654412 | 5.540372727 |  |  |  |  |  |  |
| 2210008F06RIK    | ILMN_2429915 | 0.9158323 | 0.9785725 | 0.0492365 | 0.8718555 | 0.0341603 | 0.0179371 | 5.65113     | 5.654563158 | 5.650383824 | 5.574586364 |  |  |  |  |  |  |
| 9530013H16RIK    | ILMN_2559067 | 0.5771389 | 0.3207617 | 0.0167735 | 0.7213419 | 0.0493211 | 0.0486017 | 5.806686667 | 5.790413158 | 5.782267647 | 5.730295455 |  |  |  |  |  |  |
| MACROD2          | ILMN_1226796 | 0.7170971 | 0.440629  | 0.0205588 | 0.7170822 | 0.0260174 | 0.0165478 | 5.871886667 | 5.861818421 | 5.854417647 | 5.795531818 |  |  |  |  |  |  |
| ZBTB44           | ILMN_2589136 | 0.4870447 | 0.6354427 | 0.0131313 | 0.7523904 | 0.0485749 | 0.0153755 | 5.652506667 | 5.634860526 | 5.641651471 | 5.576604545 |  |  |  |  |  |  |
| LOC209474        | ILMN_1245275 | 0.7909858 | 0.9579306 | 0.0172214 | 0.7236567 | 0.0147319 | 0.0078102 | 5.677973333 | 5.671436842 | 5.679282353 | 5.602077273 |  |  |  |  |  |  |
| OLFR1158         | ILMN_1254931 | 0.7711087 | 0.8950205 | 0.0269546 | 0.6148863 | 0.0349077 | 0.005344  | 5.90849     | 5.900489474 | 5.911680882 | 5.832872727 |  |  |  |  |  |  |
| LOC383612        | ILMN_1245739 | 0.9608875 | 0.4944551 | 0.0133369 | 0.5140363 | 0.0123428 | 0.0078986 | 5.58247     | 5.581242105 | 5.568833824 | 5.506859091 |  |  |  |  |  |  |
| NFAT5            | ILMN_2732123 | 0.7220709 | 0.6373046 | 0.013798  | 0.3755303 | 0.0051969 | 0.0342599 | 5.82748     | 5.836571053 | 5.815392647 | 5.751886364 |  |  |  |  |  |  |
| IGHV5S15_AF2909  | ILMN_2432375 | 0.2332618 | 0.593919  | 0.0082754 | 0.0524827 | 0.00034   | 0.0201746 | 5.96497     | 5.996957895 | 5.952066176 | 5.889468182 |  |  |  |  |  |  |
| ELMO2            | ILMN_3058341 | 0.1248663 | 0.2456725 | 0.0320446 | 0.6570195 | 0.0004545 | 0.0012868 | 5.873053333 | 5.918702632 | 5.906870588 | 5.79765     |  |  |  |  |  |  |
| 3110079015RIK    | ILMN_2598181 | 0.691136  | 0.3535547 | 0.0016101 | 0.1785755 | 0.0025887 | 0.0184064 | 5.66052     | 5.669471053 | 5.641986765 | 5.585468182 |  |  |  |  |  |  |
| GFR3             | ILMN_3029078 | 0.622644  | 0.9274573 | 0.0176204 | 0.6517359 | 0.0389289 | 0.0210445 | 5.61845     | 5.603889474 | 5.615789706 | 5.543463636 |  |  |  |  |  |  |
| OSBPL6           | ILMN_1219286 | 0.421244  | 0.4236816 | 0.0162348 | 0.9386201 | 0.001723  | 0.0008632 | 5.831956667 | 5.852805263 | 5.8511      | 5.757227273 |  |  |  |  |  |  |
| DLG1             | ILMN_2763839 | 0.738961  | 0.8043745 | 0.0497966 | 0.8747949 | 0.0096557 | 0.006355  | 5.726496667 | 5.737444737 | 5.733544118 | 5.652140909 |  |  |  |  |  |  |
| D130063P19RIK    | ILMN_1238936 | 0.9480958 | 0.8417107 | 0.0270262 | 0.8912641 | 0.0207869 | 0.0134556 | 5.772983333 | 5.771063158 | 5.767867647 | 5.698895455 |  |  |  |  |  |  |
| EG634762         | ILMN_1214492 | 0.2631925 | 0.7925924 | 0.0173523 | 0.1008914 | 0.0003285 | 0.0095864 | 5.778483333 | 5.806255263 | 5.772413235 | 5.704395455 |  |  |  |  |  |  |
| 4833419K08RIK    | ILMN_1250504 | 0.9049742 | 0.7421597 | 0.0204277 | 0.8107214 | 0.0042437 | 0.0019607 | 5.580176667 | 5.582989474 | 5.587622059 | 5.506263636 |  |  |  |  |  |  |
| D130061E05RIK    | ILMN_2573307 | 0.7094617 | 0.6140585 | 0.0316363 | 0.9713841 | 0.0379944 | 0.0099984 | 5.734043333 | 5.723581579 | 5.722885294 | 5.660136364 |  |  |  |  |  |  |
| TMEM219          | ILMN_2689569 | 0.2764255 | 0.7262618 | 0.0377142 | 0.4317587 | 0.00117   | 0.0087928 | 6.148696667 | 6.176007895 | 6.157932353 | 6.074918182 |  |  |  |  |  |  |
| OA1              | ILMN_1242255 | 0.487166  | 0.6445263 | 0.0299857 | 0.1361413 | 0.0012152 | 0.0120236 | 5.56251     | 5.581981579 | 5.551513235 | 5.488740909 |  |  |  |  |  |  |
| OLFR1180         | ILMN_2649883 | 0.8222038 | 0.6501832 | 0.0333256 | 0.8396433 | 0.0449768 | 0.032169  | 5.670083333 | 5.663052632 | 5.658069118 | 5.5964      |  |  |  |  |  |  |
| EFCAB1           | ILMN_2917280 | 0.4077935 | 0.7317519 | 0.0074028 | 0.5983521 | 0.0051664 | 0.0105462 | 5.710406667 | 5.73445     | 5.719770588 | 5.636781818 |  |  |  |  |  |  |
| control_ILMN_137 | ILMN_1378664 | 0.7399878 | 0.5731784 | 0.0487539 | 0.8437626 | 0.0373317 | 0.0133516 | 5.725506667 | 5.737144737 | 5.743244118 | 5.652136364 |  |  |  |  |  |  |
| BRPF1            | ILMN_2800859 | 0.10318   | 0.456572  | 0.0187149 | 0.159891  | 0.0003744 | 0.0005215 | 8.94028     | 8.991239474 | 8.957891176 | 8.866990909 |  |  |  |  |  |  |
| CORO1B           | ILMN_2788546 | 0.6102325 | 0.911713  | 0.014794  | 0.4833145 | 0.0055325 | 0.0155444 | 11.35823333 | 11.37271842 | 11.35536912 | 11.28498636 |  |  |  |  |  |  |
| LOC235971        | ILMN_1247372 | 0.5222218 | 0.3455454 | 0.0144253 | 0.7525038 | 0.0262938 | 0.0444392 | 5.526783333 | 5.511610526 | 5.505255882 | 5.453613636 |  |  |  |  |  |  |
| LOC383940        | ILMN_2536510 | 0.7782556 | 0.9425511 | 0.0417094 | 0.6416792 | 0.0053564 | 0.0102398 | 5.806973333 | 5.816121053 | 5.804944118 | 5.733954545 |  |  |  |  |  |  |
| RNF207           | ILMN_1237330 | 0.1524907 | 0.7485933 | 0.0368134 | 0.2040052 | 0.0005451 | 0.009244  | 5.854813333 | 5.893897368 | 5.863382353 | 5.781881818 |  |  |  |  |  |  |
| 1700081L16RIK    | ILMN_2426180 | 0.4254824 | 0.3879785 | 0.0201724 | 0.9762544 | 0.0368069 | 0.0475511 | 5.581866667 | 5.561147368 | 5.560519118 | 5.509463636 |  |  |  |  |  |  |
| OLFR750          | ILMN_2773535 | 0.9980588 | 0.347413  | 0.0042447 | 0.3702135 | 0.0176438 | 0.030927  | 5.666133333 | 5.666073684 | 5.646426471 | 5.593809091 |  |  |  |  |  |  |
| LOC385626        | ILMN_1244702 | 0.8619168 | 0.9055099 | 0.0212374 | 0.740134  | 0.0197902 | 0.0142778 | 6.048793333 | 6.053842105 | 6.045866176 | 5.977095455 |  |  |  |  |  |  |
| LOC384513        | ILMN_1230132 | 0.9775506 | 0.7832103 | 0.0364382 | 0.7837895 | 0.0196173 | 0.0179293 | 5.711216667 | 5.710447368 | 5.704545588 | 5.639831818 |  |  |  |  |  |  |
| LOC385059        | ILMN_2542073 | 0.8332255 | 0.6486756 | 0.0130752 | 0.8179112 | 0.020155  | 0.0150889 | 5.548423333 | 5.543284211 | 5.538563235 | 5.477318182 |  |  |  |  |  |  |
| 4930571C24RIK    | ILMN_1228034 | 0.8721725 | 0.4482687 | 0.0370055 | 0.5462199 | 0.0375868 | 0.0367313 | 5.43153     | 5.426878947 | 5.413977941 | 5.360531818 |  |  |  |  |  |  |
| PPP1R14D         | ILMN_1253015 | 0.8287285 | 0.4494114 | 0.0208985 | 0.2516059 | 0.0029559 | 0.0360052 | 5.628493333 | 5.633902632 | 5.610638235 | 5.557659091 |  |  |  |  |  |  |
| GJA7             | ILMN_1253346 | 0.8083451 | 0.7516472 | 0.0289331 | 0.9468602 | 0.0459395 | 0.0421959 | 5.87617     | 5.869497368 | 5.867842647 | 5.8054      |  |  |  |  |  |  |
| OLFR1085         | ILMN_1248151 | 0.6199621 | 0.8646509 | 0.0498615 | 0.6971271 | 0.0319696 | 0.0362017 | 5.636943333 | 5.654255263 | 5.642222059 | 5.566422727 |  |  |  |  |  |  |
| NEUROD4          | ILMN_2766939 | 0.9468943 | 0.9900661 | 0.0155689 | 0.9553691 | 0.0171478 | 0.0130846 | 5.671153333 | 5.669668421 | 5.670869118 | 5.60065     |  |  |  |  |  |  |
| LTBP1            | ILMN_1224967 | 0.9042909 | 0.6064432 | 0.0498021 | 0.6815483 | 0.0444347 | 0.0151168 | 5.68037     | 5.683613158 | 5.694298529 | 5.610181818 |  |  |  |  |  |  |
| control_ILMN_137 | ILMN_1378571 | 0.9954505 | 0.7386233 | 0.0475198 | 0.7209843 | 0.0451922 | 0.0218043 | 5.820813333 | 5.820989474 | 5.812435294 | 5.750686364 |  |  |  |  |  |  |
| PIK3R4           | ILMN_2543088 | 0.7555027 | 0.7071606 | 0.0334829 | 0.4513792 | 0.0199806 | 0.0449248 | 5.89115     | 5.900139474 | 5.881458824 | 5.821327273 |  |  |  |  |  |  |
| 2210003I03RIK    | ILMN_2710359 | 0.7059347 | 0.8516575 | 0.0226146 | 0.8690002 | 0.033072  | 0.0328199 | 5.69808     | 5.689707895 | 5.693454412 | 5.628409091 |  |  |  |  |  |  |
| 2900003A17RIK    | ILMN_2449674 | 0.964805  | 0.6037174 | 0.048409  | 0.6149156 | 0.0353241 | 0.0051105 | 6.01923     | 6.020481579 | 6.032035294 | 5.949854545 |  |  |  |  |  |  |
| EZH2             | ILMN_2606429 | 0.8838703 | 0.652619  | 0.0490933 | 0.7713393 | 0.0337646 | 0.0059032 | 5.613896667 | 5.618357895 | 5.625351471 | 5.544813636 |  |  |  |  |  |  |





|                 |              |           |           |           |           |           |           |             |             |             |             |  |  |  |  |  |  |  |  |
|-----------------|--------------|-----------|-----------|-----------|-----------|-----------|-----------|-------------|-------------|-------------|-------------|--|--|--|--|--|--|--|--|
| PUM2            | ILMN_2607160 | 1.834E-07 | 1.03E-10  | 0.3654261 | 0.5669367 | 7.737E-05 | 1.208E-06 | 8.49848     | 8.733373684 | 8.716505882 | 8.539704545 |  |  |  |  |  |  |  |  |
| SCL0002368.1_75 | ILMN_1214650 | 0.0061628 | 0.0005403 | 0.8018885 | 0.6002032 | 4.876E-05 | 2.217E-05 | 8.83479     | 9.028768421 | 9.052716176 | 8.814618182 |  |  |  |  |  |  |  |  |
| COX7A1          | ILMN_1240857 | 0.0003356 | 4.324E-08 | 0.3145874 | 0.0611814 | 0.0056518 | 1.055E-05 | 6.94444     | 7.100284211 | 7.161101471 | 6.989281818 |  |  |  |  |  |  |  |  |
| NPC2            | ILMN_2744380 | 2.733E-06 | 6.581E-08 | 0.0829615 | 0.660283  | 0.0065729 | 0.0018198 | 9.368056667 | 9.561731579 | 9.575010294 | 9.4518      |  |  |  |  |  |  |  |  |
| SAMHD1          | ILMN_1221736 | 1.42E-06  | 6.451E-07 | 0.1235508 | 0.3860393 | 0.001021  | 0.001305  | 11.84208667 | 12.07217895 | 12.04837794 | 11.93060909 |  |  |  |  |  |  |  |  |
| CLCN3           | ILMN_1221919 | 1.302E-06 | 1.969E-06 | 0.1671821 | 0.9353394 | 0.000792  | 0.0029833 | 8.224926667 | 8.427963158 | 8.430619118 | 8.2973      |  |  |  |  |  |  |  |  |
| PTPN1           | ILMN_1222917 | 3.577E-07 | 1.066E-05 | 0.2605158 | 0.0980524 | 0.0001364 | 0.0036276 | 9.086276667 | 9.362913158 | 9.291763235 | 9.143836364 |  |  |  |  |  |  |  |  |
| CBFB            | ILMN_2671644 | 4.874E-05 | 9.419E-07 | 0.0925495 | 0.5793726 | 0.0099041 | 0.0023062 | 6.44466     | 6.629710526 | 6.648410294 | 6.525068182 |  |  |  |  |  |  |  |  |
| 5830457010RIK   | ILMN_1249269 | 0.0051915 | 0.0001913 | 0.3258661 | 0.6242513 | 0.0391047 | 0.0065255 | 6.626373333 | 6.803589474 | 6.824932353 | 6.691472727 |  |  |  |  |  |  |  |  |
| HIST1H2AG       | ILMN_2981801 | 0.0014204 | 4.276E-06 | 0.5091729 | 0.1896142 | 0.0106585 | 0.0002015 | 9.87061     | 10.02252105 | 10.067625   | 9.906631818 |  |  |  |  |  |  |  |  |
| LOC383706       | ILMN_2535779 | 0.0002793 | 1.68E-06  | 0.1930403 | 0.2544232 | 0.0124523 | 0.0007026 | 8.164186667 | 8.320342105 | 8.360444118 | 8.219022727 |  |  |  |  |  |  |  |  |
| TPM4            | ILMN_1223539 | 6.066E-06 | 2.605E-05 | 0.0918537 | 0.135282  | 0.0023364 | 0.0357186 | 7.28479     | 7.536536842 | 7.481042647 | 7.387468182 |  |  |  |  |  |  |  |  |
| CYB5            | ILMN_2775098 | 1.34E-08  | 6.241E-13 | 0.1162492 | 0.1205256 | 0.0001373 | 3.917E-07 | 11.01746667 | 11.17962895 | 11.21147353 | 11.06824091 |  |  |  |  |  |  |  |  |
| TOP2A           | ILMN_1255436 | 7.891E-10 | 1.572E-08 | 0.0936923 | 0.2373449 | 3.871E-05 | 0.0009104 | 6.89295     | 7.115813158 | 7.084679412 | 6.964609091 |  |  |  |  |  |  |  |  |
| DCUN1D5         | ILMN_1238285 | 4.199E-06 | 1.874E-06 | 0.3808523 | 0.3750355 | 0.0001445 | 0.0002891 | 9.349493333 | 9.563021053 | 9.534638235 | 9.392522727 |  |  |  |  |  |  |  |  |
| PPP1CB          | ILMN_2647628 | 1.281E-05 | 1.161E-05 | 0.1588769 | 0.1818483 | 0.0045437 | 0.0174578 | 7.532633333 | 7.763778947 | 7.717295588 | 7.616245455 |  |  |  |  |  |  |  |  |
| PJA1            | ILMN_2516312 | 4.754E-05 | 5.509E-05 | 0.1330899 | 0.4609369 | 0.0082031 | 0.0301125 | 6.55579     | 6.763297368 | 6.736463235 | 6.640472727 |  |  |  |  |  |  |  |  |
| CD247           | ILMN_1256639 | 9.093E-07 | 6.486E-10 | 0.3133538 | 0.6696727 | 0.0016499 | 3.792E-05 | 7.05133     | 7.215657895 | 7.226701471 | 7.088009091 |  |  |  |  |  |  |  |  |
| RNF8            | ILMN_1214110 | 0.0001013 | 2.758E-05 | 0.1329161 | 0.8730459 | 0.0160342 | 0.019529  | 6.676843333 | 6.857478947 | 6.852086765 | 6.755077273 |  |  |  |  |  |  |  |  |
| TRMT2A          | ILMN_2682887 | 0.0034073 | 0.0002859 | 0.4813778 | 0.7996107 | 0.0204651 | 0.0056935 | 6.52321     | 6.684289474 | 6.694272059 | 6.565359091 |  |  |  |  |  |  |  |  |
| ARL1            | ILMN_1219577 | 2.543E-06 | 5.309E-06 | 0.0628551 | 0.252179  | 0.001757  | 0.0180858 | 9.743456667 | 9.9474      | 9.913035294 | 9.828659091 |  |  |  |  |  |  |  |  |
| 4930539E08RIK   | ILMN_1238069 | 3.208E-08 | 9.794E-09 | 0.4673532 | 0.7903331 | 4.063E-05 | 2.167E-05 | 6.088663333 | 6.262042105 | 6.255341176 | 6.113204545 |  |  |  |  |  |  |  |  |
| CXCR6           | ILMN_1221846 | 0.0001942 | 3.581E-05 | 0.3671141 | 0.8541377 | 0.0084059 | 0.0045185 | 6.669376667 | 6.827515789 | 6.833716176 | 6.712486364 |  |  |  |  |  |  |  |  |
| TMPO            | ILMN_2471359 | 0.0001538 | 1.421E-06 | 0.1449368 | 0.8139868 | 0.0179909 | 0.0026101 | 8.46599     | 8.623305263 | 8.629933824 | 8.530504545 |  |  |  |  |  |  |  |  |
| IRF1            | ILMN_2649068 | 0.0182535 | 0.008745  | 0.9479639 | 0.9043042 | 0.0048358 | 0.0058889 | 10.31889    | 10.48616842 | 10.48073382 | 10.32447727 |  |  |  |  |  |  |  |  |
| ACTN4           | ILMN_1242390 | 0.0043415 | 0.0010632 | 0.9291751 | 0.9191823 | 0.0073692 | 0.0031055 | 6.448333333 | 6.604534211 | 6.608894118 | 6.453640909 |  |  |  |  |  |  |  |  |
| WDR45L          | ILMN_1242852 | 0.0001397 | 1.014E-05 | 0.4396148 | 0.8937027 | 0.0072572 | 0.0019591 | 7.205136667 | 7.360331579 | 7.364545588 | 7.240713636 |  |  |  |  |  |  |  |  |
| ZFP281          | ILMN_2487243 | 1.384E-06 | 4.322E-06 | 0.3188726 | 0.1898452 | 0.0001716 | 0.0018034 | 8.814456667 | 9.007431579 | 8.973852941 | 8.863868182 |  |  |  |  |  |  |  |  |
| D6WSU163E       | ILMN_1224433 | 1.163E-07 | 2.49E-06  | 0.0702723 | 0.1647996 | 0.0020446 | 0.0255861 | 6.423556667 | 6.621960526 | 6.581777941 | 6.499395455 |  |  |  |  |  |  |  |  |
| NUDCD2          | ILMN_2751228 | 0.0021746 | 0.0023554 | 0.4881067 | 0.5065572 | 0.0233342 | 0.0387743 | 6.944946667 | 7.134152632 | 7.101964706 | 6.987381818 |  |  |  |  |  |  |  |  |
| H2-T23          | ILMN_1223179 | 0.0048276 | 0.0004926 | 0.385449  | 0.6647609 | 0.023522  | 0.0104316 | 10.62381    | 10.76490263 | 10.77933382 | 10.67458636 |  |  |  |  |  |  |  |  |
| LOC667005       | ILMN_1217929 | 0.0009143 | 0.0005654 | 0.7436009 | 0.7376516 | 0.0008964 | 0.0006125 | 6.864946667 | 7.033302632 | 7.019588235 | 6.847404545 |  |  |  |  |  |  |  |  |
| E1F3B           | ILMN_1233746 | 0.0007598 | 0.0001797 | 0.3382327 | 0.8693315 | 0.0125905 | 0.0099399 | 6.22973     | 6.388731579 | 6.382969118 | 6.276936364 |  |  |  |  |  |  |  |  |
| ELAC2           | ILMN_1255921 | 0.0013267 | 0.0001292 | 0.6032269 | 0.9503948 | 0.008666  | 0.0023259 | 6.199506667 | 6.348668421 | 6.350842647 | 6.22455     |  |  |  |  |  |  |  |  |
| GLT7            | ILMN_2753314 | 3.067E-06 | 4.55E-06  | 0.2576346 | 0.165215  | 8.345E-05 | 0.0006453 | 7.284363333 | 7.47345     | 7.434189706 | 7.326722727 |  |  |  |  |  |  |  |  |
| LOC100046320    | ILMN_1243283 | 0.0006338 | 0.0007498 | 0.2955672 | 0.4137896 | 0.0153852 | 0.0360649 | 7.5542      | 7.737257895 | 7.703685294 | 7.607563636 |  |  |  |  |  |  |  |  |
| PARP14          | ILMN_2825803 | 9.76E-07  | 3.908E-06 | 0.3720343 | 0.4890092 | 9.779E-05 | 0.0009547 | 10.98116    | 11.14566053 | 11.12864853 | 11.01771364 |  |  |  |  |  |  |  |  |
| PK3             | ILMN_1236323 | 5.828E-05 | 1.915E-06 | 0.1683357 | 0.7021492 | 0.0291329 | 0.0074242 | 6.16902     | 6.306352632 | 6.316370588 | 6.225122727 |  |  |  |  |  |  |  |  |
| ZZZ3            | ILMN_2432040 | 0.0014965 | 5.402E-06 | 0.378144  | 0.2315133 | 0.04634   | 0.0017282 | 6.03378     | 6.146386842 | 6.180801471 | 6.068531818 |  |  |  |  |  |  |  |  |
| LOC100041450    | ILMN_1242660 | 0.0001568 | 1.45E-06  | 0.3931224 | 0.2140731 | 0.0049911 | 0.0002981 | 6.805983333 | 6.921857895 | 6.952891176 | 6.835990909 |  |  |  |  |  |  |  |  |
| WAPAL           | ILMN_1242714 | 3.611E-05 | 3.018E-05 | 0.1528919 | 0.672663  | 0.0095934 | 0.0219708 | 6.27658     | 6.434936842 | 6.423070588 | 6.340836364 |  |  |  |  |  |  |  |  |
| 8030402P03RIK   | ILMN_2585137 | 0.0022227 | 7.373E-05 | 0.5863732 | 0.4333824 | 0.0221549 | 0.0025129 | 7.633246667 | 7.750686842 | 7.775892647 | 7.655845455 |  |  |  |  |  |  |  |  |
| A630098G22RIK   | ILMN_2582171 | 0.0002997 | 0.0001568 | 0.1752775 | 0.4269924 | 0.0214848 | 0.0371472 | 6.98317     | 7.150939474 | 7.12385     | 7.044545455 |  |  |  |  |  |  |  |  |
| CSF1            | ILMN_1254561 | 1.52E-07  | 5.768E-06 | 0.1116898 | 0.107214  | 0.0007031 | 0.0130531 | 6.24299     | 6.430692105 | 6.383498529 | 6.296836364 |  |  |  |  |  |  |  |  |
| FBXO33          | ILMN_3162369 | 0.0001389 | 5.808E-07 | 0.3215115 | 0.5062504 | 0.0167325 | 0.000955  | 8.757316667 | 8.881023684 | 8.897601471 | 8.793440909 |  |  |  |  |  |  |  |  |
| SLCO3A1         | ILMN_1235635 | 0.0009188 | 0.000204  | 0.7309941 | 0.9859045 | 0.0049286 | 0.0024582 | 6.011396667 | 6.150071053 | 6.150582353 | 6.029604545 |  |  |  |  |  |  |  |  |
| PDLM1           | ILMN_1234072 | 0.0044138 | 3.993E-05 | 0.8543867 | 0.2320581 | 0.004056  | 7.263E-05 | 9.389206667 | 9.494944737 | 9.528047059 | 9.380759091 |  |  |  |  |  |  |  |  |
| 2810008M24RIK   | ILMN_2486600 | 0.0001974 | 8.115E-06 | 0.3528546 | 0.8370992 | 0.0037293 | 0.0008125 | 9.577263333 | 9.719655263 | 9.714169118 | 9.612672727 |  |  |  |  |  |  |  |  |
| 1700025G04RIK   | ILMN_2669982 | 7.521E-06 | 1.338E-05 | 0.1133944 | 0.3562127 | 0.0011588 | 0.0116783 | 7.13209     | 7.290965789 | 7.268439706 | 7.1935      |  |  |  |  |  |  |  |  |
| BCL11B          | ILMN_2443624 | 0.0015187 | 0.0018521 | 0.07205   | 0.6258324 | 4.592E-06 | 2.444E-06 | 7.475326667 | 7.627081579 | 7.608722059 | 7.374281818 |  |  |  |  |  |  |  |  |
| D630022O22RIK   | ILMN_1223311 | 2.867E-05 | 3.487E-05 | 0.3400248 | 0.8660441 | 0.0030361 | 0.0061045 | 6.197413333 | 6.334594737 | 6.330180882 | 6.235186364 |  |  |  |  |  |  |  |  |
| DMBT1           | ILMN_2629239 | 2.525E-05 | 9.868E-06 | 0.1748778 | 0.8787925 | 0.0284553 | 0.0220519 | 5.65465     | 5.791228947 | 5.787077941 | 5.706268182 |  |  |  |  |  |  |  |  |
| MAD2L1BP        | ILMN_2815222 | 0.0012164 | 1.37E-06  | 0.4454937 | 0.2891597 | 0.0074512 | 4.415E-05 | 9.83867     | 9.946563158 | 9.970585294 | 9.864663636 |  |  |  |  |  |  |  |  |
| IRF1            | ILMN_2649067 | 0.0389177 | 0.0268373 | 0.9283349 | 0.6734148 | 0.0111936 | 0.0153172 | 10.39029333 | 10.53875526 | 10.52146618 | 10.39822727 |  |  |  |  |  |  |  |  |
| ETS1            | ILMN_2770739 | 0.0014202 | 0.003545  | 0.7381796 | 0.3882843 | 0.0040934 | 0.0168068 | 7.680986667 | 7.843268421 | 7.811420588 | 7.700831818 |  |  |  |  |  |  |  |  |
| 1810013L24RIK   | ILMN_1260569 | 2.497E-08 | 2.603E-06 | 0.1212941 | 0.1254551 | 0.0001023 | 0.0081654 | 7.528863333 | 7.691768421 | 7.658367647 | 7.581836364 |  |  |  |  |  |  |  |  |
| TOR1A           | ILMN_2631144 | 0.0007978 | 4.721E-05 | 0.2655705 | 0.5500238 | 0.0416582 | 0.0108028 | 7.383143333 | 7.495473684 | 7.511541176 | 7.425604545 |  |  |  |  |  |  |  |  |
| TRAT1           | ILMN_1229005 | 0.0031667 | 0.0002999 | 0.6193732 | 0.7273838 | 0.0027538 | 0.000195  | 6.647076667 | 6.785913158 | 6.773917647 | 6.622813636 |  |  |  |  |  |  |  |  |
| PABPC1          | ILMN_1259769 | 0.0022435 | 0.0104623 | 0.9375031 | 0.1698843 | 0.0019564 | 0.0137295 | 6.85638     | 7.040826316 | 6.981691176 | 6.861254545 |  |  |  |  |  |  |  |  |
| H2AFZ           | ILMN_3074985 | 0.0004716 | 0.0001041 | 0.1178648 | 0.8869298 | 0.0499257 | 0.0416554 | 11.8057966  |             |             |             |  |  |  |  |  |  |  |  |

|               |              |           |           |           |           |           |           |             |             |             |             |  |  |  |  |  |  |
|---------------|--------------|-----------|-----------|-----------|-----------|-----------|-----------|-------------|-------------|-------------|-------------|--|--|--|--|--|--|
| ZDHC21        | ILMN_2780619 | 0.0066739 | 0.0003336 | 0.7907514 | 0.4972362 | 0.0196609 | 0.0024035 | 8.437696667 | 8.5418      | 8.562170588 | 8.449168182 |  |  |  |  |  |  |
| ZNF24         | ILMN_2518828 | 0.021391  | 0.000404  | 0.6021228 | 0.1239823 | 0.004883  | 0.000186  | 6.048016667 | 6.124986842 | 6.171314706 | 6.028518182 |  |  |  |  |  |  |
| ZWILCH        | ILMN_1247268 | 0.0005599 | 0.0006099 | 0.305414  | 0.6301429 | 0.0312265 | 0.0462173 | 6.168553333 | 6.305978947 | 6.289795588 | 6.210068182 |  |  |  |  |  |  |
| AP1B1         | ILMN_1244906 | 4.353E-05 | 2.938E-06 | 0.1251398 | 0.8087134 | 0.023292  | 0.0132339 | 10.82644667 | 10.95238421 | 10.94691618 | 10.87835    |  |  |  |  |  |  |
| 2500002A22RIK | ILMN_1255902 | 9.823E-05 | 0.0012723 | 0.7473814 | 0.3107468 | 0.0008764 | 0.0105752 | 6.55427     | 6.705039474 | 6.673707353 | 6.569454545 |  |  |  |  |  |  |
| LOC380707     | ILMN_1252450 | 0.0012425 | 0.0017786 | 0.9635044 | 0.7942431 | 0.0014543 | 0.0034494 | 9.90633     | 10.03282105 | 10.02428529 | 9.90435     |  |  |  |  |  |  |
| TNP2          | ILMN_1224330 | 7.377E-05 | 0.0001617 | 0.330308  | 0.2329272 | 0.0044444 | 0.0192587 | 5.844083333 | 5.988826316 | 5.958627941 | 5.884845455 |  |  |  |  |  |  |
| GTF3C5        | ILMN_1222243 | 0.0059505 | 0.0001115 | 0.6279649 | 0.404636  | 0.0404102 | 0.0029389 | 5.814863333 | 5.905071053 | 5.927685294 | 5.83125     |  |  |  |  |  |  |
| HIST1H2AK     | ILMN_2847144 | 0.0019193 | 0.0051082 | 0.8806175 | 0.4091838 | 0.0026227 | 0.0069281 | 12.67005667 | 12.80842105 | 12.78147206 | 12.66135909 |  |  |  |  |  |  |
| RNGTT         | ILMN_2750669 | 0.0128245 | 0.0023161 | 0.9298071 | 0.7426152 | 0.0166158 | 0.0052134 | 6.190413333 | 6.291310526 | 6.301817647 | 6.194254545 |  |  |  |  |  |  |
| VPS37B        | ILMN_2681670 | 0.0074366 | 0.0017717 | 0.2717552 | 0.9367849 | 8.964E-05 | 1.742E-05 | 10.44526333 | 10.55398421 | 10.55639412 | 10.39754091 |  |  |  |  |  |  |
| F830048D03RIK | ILMN_2584985 | 0.0357552 | 0.0017199 | 0.6376489 | 0.3937319 | 0.0150219 | 0.0007896 | 6.689073333 | 6.771521053 | 6.799188235 | 6.670236364 |  |  |  |  |  |  |
| USF1          | ILMN_2435505 | 0.0138797 | 0.009899  | 0.6581491 | 0.8509838 | 0.0412597 | 0.0471047 | 6.804973333 | 6.921971053 | 6.914854412 | 6.826927273 |  |  |  |  |  |  |
| HEATR3        | ILMN_2590644 | 0.0080322 | 0.0003283 | 0.7917175 | 0.6138605 | 0.0146601 | 0.009865  | 5.744316667 | 5.838378947 | 5.853311765 | 5.734418182 |  |  |  |  |  |  |
| STIL          | ILMN_2654075 | 0.0362002 | 0.0003313 | 0.8132537 | 0.134671  | 0.0407928 | 0.0008118 | 5.61879     | 5.685102632 | 5.726732353 | 5.610486364 |  |  |  |  |  |  |
| FEM1C         | ILMN_2724409 | 0.0003443 | 6.939E-05 | 0.2502713 | 0.5010987 | 0.0111721 | 0.0113217 | 7.96895     | 8.091639474 | 8.076245588 | 8.010295455 |  |  |  |  |  |  |
| EG666756      | ILMN_1214902 | 9.451E-05 | 0.0003847 | 0.4631473 | 0.2674416 | 0.0047458 | 0.0182487 | 10.67756    | 10.81662632 | 10.78483529 | 10.70416364 |  |  |  |  |  |  |
| PIBF1         | ILMN_3115640 | 5.559E-05 | 0.0003718 | 0.2499334 | 0.1444557 | 0.0044791 | 0.0448955 | 6.849893333 | 6.993676316 | 6.956576471 | 6.895045455 |  |  |  |  |  |  |
| MX2           | ILMN_1239219 | 0.0068612 | 0.0108891 | 0.8598659 | 0.6741755 | 0.0047833 | 0.0106972 | 7.97713     | 8.098521053 | 8.082936765 | 7.968677273 |  |  |  |  |  |  |
| CHIC2         | ILMN_2548974 | 0.0004283 | 0.0001532 | 0.260031  | 0.5502436 | 0.0254452 | 0.0259537 | 8.378606667 | 8.498828947 | 8.484154412 | 8.42045     |  |  |  |  |  |  |
| E1F4E3        | ILMN_1254878 | 6.557E-05 | 0.0025094 | 0.6206909 | 0.0708281 | 2.875E-06 | 0.0004164 | 8.776916667 | 8.931847368 | 8.881707353 | 8.754254545 |  |  |  |  |  |  |
| RPL37         | ILMN_1236446 | 0.0002543 | 0.0003352 | 0.2816868 | 0.5589165 | 0.0102113 | 0.0240646 | 5.6613      | 5.780355263 | 5.765086765 | 5.696131818 |  |  |  |  |  |  |
| ELF1          | ILMN_2659380 | 0.0148489 | 0.0011844 | 0.7138757 | 0.9039232 | 0.0069592 | 0.0003911 | 10.33958333 | 10.43980263 | 10.44328824 | 10.32341818 |  |  |  |  |  |  |
| BAT2D         | ILMN_1221890 | 0.0015367 | 0.0001683 | 0.8307622 | 0.5760588 | 0.0106124 | 0.0026079 | 5.830226667 | 5.947547368 | 5.932069118 | 5.837931818 |  |  |  |  |  |  |
| 4930404F20RIK | ILMN_1222969 | 0.0360605 | 0.0001718 | 0.7431989 | 0.1391011 | 0.0161718 | 7.394E-05 | 6.658073333 | 6.724336842 | 6.759348529 | 6.646877273 |  |  |  |  |  |  |
| LOC100044190  | ILMN_1214731 | 2.746E-05 | 0.0018164 | 0.988103  | 0.0603332 | 0.0002041 | 0.006513  | 10.56954667 | 10.72565263 | 10.67076618 | 10.57017273 |  |  |  |  |  |  |
| EPST1         | ILMN_2707865 | 0.0071416 | 0.0014801 | 0.5480541 | 0.6847784 | 0.0363948 | 0.0198692 | 8.180176667 | 8.271594737 | 8.281332353 | 8.206504545 |  |  |  |  |  |  |
| GP1           | ILMN_2692845 | 3.304E-06 | 0.000112  | 0.1541174 | 0.1930921 | 0.0029369 | 0.0470385 | 11.68305667 | 11.81179474 | 11.7829     | 11.72728182 |  |  |  |  |  |  |
| 4930422G04RIK | ILMN_1243091 | 8.401E-05 | 6.98E-05  | 0.1535267 | 0.7726701 | 0.0350024 | 0.0486999 | 5.690713333 | 5.795713158 | 5.789577941 | 5.735836364 |  |  |  |  |  |  |
| RBM14         | ILMN_1245292 | 0.0018364 | 0.0019379 | 0.6891648 | 0.4886926 | 0.0280755 | 0.033881  | 6.059196667 | 6.178389474 | 6.157111765 | 6.07645     |  |  |  |  |  |  |
| 4932413O14RIK | ILMN_2620757 | 0.0127067 | 0.0007843 | 0.9954839 | 0.4908601 | 0.0216546 | 0.0024511 | 5.634773333 | 5.714357895 | 5.731648529 | 5.634990909 |  |  |  |  |  |  |
| CD247         | ILMN_2828172 | 0.0095874 | 0.0020148 | 0.4593334 | 0.7912747 | 0.0055389 | 0.0007173 | 6.427023333 | 6.531918421 | 6.523489706 | 6.396290909 |  |  |  |  |  |  |
| CCR4          | ILMN_2753620 | 0.0017762 | 0.0006187 | 0.4406932 | 0.7358693 | 0.0181035 | 0.0161563 | 5.72549     | 5.829228947 | 5.821095588 | 5.752877273 |  |  |  |  |  |  |
| ZFP800        | ILMN_2760387 | 0.0448081 | 0.0075997 | 0.9676854 | 0.6623265 | 0.0439818 | 0.0101354 | 6.687236667 | 6.769447368 | 6.782586765 | 6.685263636 |  |  |  |  |  |  |
| PABPC1        | ILMN_1259482 | 0.0051572 | 0.0138815 | 0.6552533 | 0.3254165 | 0.0027309 | 0.006147  | 11.55015    | 11.68038684 | 11.64491176 | 11.52837273 |  |  |  |  |  |  |
| D230021E06RIK | ILMN_2569706 | 0.0001027 | 0.0107031 | 0.9348866 | 0.0663329 | 0.0001087 | 0.0197819 | 7.510763333 | 7.665360526 | 7.605245588 | 7.514104545 |  |  |  |  |  |  |
| SELP          | ILMN_1236889 | 0.0140687 | 0.0058444 | 0.9379626 | 0.9259121 | 0.0105505 | 0.0086371 | 6.475836667 | 6.566694737 | 6.569254412 | 6.479186364 |  |  |  |  |  |  |
| TSPAN14       | ILMN_1257666 | 0.0006106 | 0.0021634 | 0.9918866 | 0.600334  | 0.0012631 | 0.0057197 | 9.755656667 | 9.861615789 | 9.848317647 | 9.756059091 |  |  |  |  |  |  |
| V1RD18        | ILMN_2996714 | 0.0009999 | 0.0004902 | 0.3718426 | 0.6093331 | 0.0390579 | 0.0399917 | 5.599066667 | 5.703860526 | 5.691057353 | 5.629445455 |  |  |  |  |  |  |
| CD226         | ILMN_1239753 | 0.0261779 | 0.0085975 | 0.6790065 | 0.9259328 | 0.0193439 | 0.005597  | 6.903246667 | 6.998228947 | 6.995114706 | 6.884318182 |  |  |  |  |  |  |
| Mgeneric      | ILMN_2600747 | 0.0031996 | 0.0012523 | 0.5857151 | 0.921512  | 0.0155614 | 0.0137085 | 6.73558     | 6.829271053 | 6.826967647 | 6.755563636 |  |  |  |  |  |  |
| 2310016C16RIK | ILMN_2625854 | 3.934E-05 | 0.0016327 | 0.4362885 | 0.211481  | 0.0011679 | 0.0354731 | 5.732096667 | 5.854347368 | 5.823288235 | 5.757786364 |  |  |  |  |  |  |
| DCK           | ILMN_1227664 | 0.0051761 | 0.0184859 | 0.3369228 | 0.393242  | 0.0004955 | 0.0017168 | 6.626113333 | 6.746452632 | 6.716342647 | 6.582109091 |  |  |  |  |  |  |
| PCDHGC5       | ILMN_1216284 | 0.0121025 | 0.0028888 | 0.982265  | 0.8269325 | 0.0154234 | 0.005817  | 5.98469     | 6.068434211 | 6.074589706 | 5.985395455 |  |  |  |  |  |  |
| UBE2Z         | ILMN_2774701 | 0.0042651 | 0.0035787 | 0.8977551 | 0.802039  | 0.022089  | 0.0197221 | 6.080933333 | 6.175294737 | 6.168729412 | 6.086440909 |  |  |  |  |  |  |
| PLXNC1        | ILMN_2756855 | 0.0132133 | 0.0099808 | 0.7888317 | 0.8652899 | 0.043813  | 0.0427865 | 6.419863333 | 6.511336842 | 6.506238235 | 6.43105     |  |  |  |  |  |  |
| PSEN2         | ILMN_1213684 | 0.0189562 | 0.0056686 | 0.8398917 | 0.9864612 | 0.0430124 | 0.0193465 | 5.908983333 | 5.994313158 | 5.994827941 | 5.915718182 |  |  |  |  |  |  |
| STAT3         | ILMN_2698046 | 0.0009534 | 0.0115729 | 0.8152262 | 0.3037877 | 0.0034476 | 0.0393006 | 10.98784    | 11.10429737 | 11.07339706 | 10.99688182 |  |  |  |  |  |  |
| LOC628101     | ILMN_1213707 | 0.004533  | 0.0111088 | 0.6456473 | 0.4943089 | 0.0047831 | 0.0087798 | 6.481883333 | 6.588642105 | 6.566361765 | 6.46445     |  |  |  |  |  |  |
| GREM2         | ILMN_2610565 | 0.0034682 | 0.0112391 | 0.9597837 | 0.5615038 | 0.0114491 | 0.0312014 | 9.5919      | 6.052036842 | 6.035844118 | 5.954177273 |  |  |  |  |  |  |
| INPP4B        | ILMN_2854354 | 0.0001211 | 0.0045817 | 0.8300829 | 0.214436  | 0.0007914 | 0.0208243 | 6.231216667 | 6.344565789 | 6.313639706 | 6.238772727 |  |  |  |  |  |  |
| NEO1          | ILMN_2579266 | 0.0118953 | 0.0023659 | 0.7127533 | 0.7455244 | 0.003547  | 0.0009012 | 6.07765     | 6.151984211 | 6.158933824 | 6.063904545 |  |  |  |  |  |  |
| 1700027N10RIK | ILMN_2775220 | 0.0087824 | 0.0009903 | 0.9594418 | 0.7293236 | 0.0077204 | 0.0015392 | 6.36718     | 6.440963158 | 6.448286765 | 6.3687      |  |  |  |  |  |  |
| ZFP277        | ILMN_3123889 | 0.04469   | 0.0040836 | 0.399287  | 0.4562136 | 0.0060016 | 0.0004105 | 9.87083     | 9.932757895 | 9.951282353 | 9.841213636 |  |  |  |  |  |  |
| GNL3L         | ILMN_2628122 | 0.0042936 | 0.0168829 | 0.8533817 | 0.3932727 | 0.0079319 | 0.0410368 | 7.609203333 | 7.714147368 | 7.689342647 | 7.616795455 |  |  |  |  |  |  |
| LOC100047009  | ILMN_1246359 | 0.0016461 | 0.0045336 | 0.6158285 | 0.5219803 | 0.0005793 | 0.0021157 | 5.947723333 | 6.043807895 | 6.027170588 | 5.933       |  |  |  |  |  |  |
| PPP2R5C       | ILMN_3121851 | 0.0121003 | 0.0259879 | 0.9530225 | 0.3251563 | 0.0068232 | 0.02552   | 9.96416     | 10.07191842 | 10.04338529 | 9.967009091 |  |  |  |  |  |  |
| LOC235279     | ILMN_1231838 | 0.0022376 | 0.0005205 | 0.8114829 | 0.9149712 | 0.0151046 | 0.0059357 | 5.738703333 | 5.820126316 | 5.817807353 | 5.745463636 |  |  |  |  |  |  |
| PLEKHF2       | ILMN_1237736 | 0.0035081 | 0.0109001 | 0.9737767 | 0.2710677 | 0.0014493 | 0.0102796 | 8.16861     | 8.274002632 | 8.246895588 | 8.169977273 |  |  |  |  |  |  |
| IL1F10        | ILMN_2776687 | 0.0267869 | 0.0137905 | 0.9852541 | 0.8846595 | 0.0495733 | 0.0296692 | 5.98729     | 6.069436842 | 6.065126471 | 5.986545455 |  |  |  |  |  |  |

|               |              |           |           |           |           |           |           |             |             |             |             |  |  |  |  |  |  |  |  |
|---------------|--------------|-----------|-----------|-----------|-----------|-----------|-----------|-------------|-------------|-------------|-------------|--|--|--|--|--|--|--|--|
| 3202002H23RIK | ILMN_1236031 | 0.012129  | 0.0092909 | 0.483435  | 0.6661905 | 0.0015716 | 0.0009907 | 6.4492      | 6.538394737 | 6.526935294 | 6.422209091 |  |  |  |  |  |  |  |  |
| LOC381093     | ILMN_2530674 | 0.0037258 | 0.0023124 | 0.5246847 | 0.9676352 | 0.0023089 | 0.0013058 | 5.809203333 | 5.883715789 | 5.884635294 | 5.790786364 |  |  |  |  |  |  |  |  |
| KRT25         | ILMN_1216096 | 0.0135579 | 0.0136597 | 0.8793285 | 0.6350166 | 0.0416839 | 0.0461866 | 5.72627     | 5.813852632 | 5.800451471 | 5.73225     |  |  |  |  |  |  |  |  |
| VMN2R81       | ILMN_2628699 | 0.0233293 | 0.0022967 | 0.9367462 | 0.5493774 | 0.0345394 | 0.0052882 | 5.918906667 | 5.979321053 | 5.992120588 | 5.916390909 |  |  |  |  |  |  |  |  |
| FERD3L        | ILMN_2724181 | 0.0328662 | 0.0320617 | 0.7059836 | 0.7516483 | 0.0172619 | 0.017198  | 5.81418     | 5.896818421 | 5.887038235 | 5.798140909 |  |  |  |  |  |  |  |  |
| TELO2         | ILMN_2734797 | 0.0108678 | 0.0410319 | 0.5554944 | 0.4051911 | 0.0032397 | 0.0126048 | 5.800226667 | 5.898847368 | 5.872701471 | 5.773190909 |  |  |  |  |  |  |  |  |
| 9430077D24RIK | ILMN_2524699 | 0.0031698 | 0.0424885 | 0.6312243 | 0.121102  | 0.0001607 | 0.0086891 | 7.0186      | 7.135728947 | 7.091011765 | 6.99615     |  |  |  |  |  |  |  |  |
| SLC30A8       | ILMN_2686369 | 0.0253593 | 0.0118829 | 0.8033146 | 0.706046  | 0.0185698 | 0.0114584 | 5.580283333 | 5.643439474 | 5.652214706 | 5.570627272 |  |  |  |  |  |  |  |  |
| TRAPP2        | ILMN_2438032 | 0.0128277 | 0.0167637 | 0.9903469 | 0.7905655 | 0.016867  | 0.0288908 | 5.7618      | 5.839247368 | 5.832552941 | 5.76225     |  |  |  |  |  |  |  |  |
| C920025C15RIK | ILMN_1242664 | 0.025157  | 0.041818  | 0.1248153 | 0.5543993 | 0.0009658 | 0.0008659 | 6.85869     | 6.949318421 | 6.929292647 | 6.796427273 |  |  |  |  |  |  |  |  |
| KLRA1         | ILMN_1228875 | 0.0210432 | 0.0152911 | 0.9356955 | 0.6111696 | 0.0257936 | 0.0195506 | 5.763913333 | 5.846684211 | 5.833513235 | 5.760622727 |  |  |  |  |  |  |  |  |
| EG386506      | ILMN_1225532 | 0.0443727 | 0.0195343 | 0.7357978 | 0.7211962 | 0.0336209 | 0.017162  | 5.675066667 | 5.7339      | 5.743238235 | 5.663213636 |  |  |  |  |  |  |  |  |
| LOC383306     | ILMN_1235357 | 0.000646  | 0.0212078 | 0.9585536 | 0.0838609 | 0.0013532 | 0.0400109 | 5.85391     | 5.963960526 | 5.920935294 | 5.8559      |  |  |  |  |  |  |  |  |
| VMN2R89       | ILMN_3151786 | 0.0333377 | 0.0437252 | 0.8447629 | 0.5683777 | 0.0340101 | 0.0386624 | 6.176576667 | 6.259428947 | 6.242405882 | 6.168013636 |  |  |  |  |  |  |  |  |
| LOC244219     | ILMN_2525856 | 0.0425273 | 0.0175024 | 0.5375149 | 0.8250013 | 0.0148012 | 0.0057212 | 5.892636667 | 5.952907895 | 5.958372059 | 5.870513636 |  |  |  |  |  |  |  |  |
| 2610017G09RIK | ILMN_1226459 | 0.0462486 | 0.0299381 | 0.9979677 | 0.9783931 | 0.0380499 | 0.0356214 | 5.774383333 | 5.840123684 | 5.839426471 | 5.774468182 |  |  |  |  |  |  |  |  |
| LOC386161     | ILMN_1257961 | 0.0100486 | 0.0131679 | 0.8190764 | 0.8131695 | 0.0322735 | 0.0481536 | 5.588033333 | 5.657231579 | 5.651886765 | 5.595286364 |  |  |  |  |  |  |  |  |
| NCDN          | ILMN_2664579 | 0.0342661 | 0.016931  | 0.9295063 | 0.9931828 | 0.0498308 | 0.0283885 | 5.806293333 | 5.869863158 | 5.869651471 | 5.803568182 |  |  |  |  |  |  |  |  |
| SLFN9         | ILMN_2688948 | 0.0325834 | 0.0292092 | 0.8362985 | 0.6502896 | 0.0335642 | 0.0471183 | 5.536233333 | 5.60855     | 5.597972059 | 5.544027273 |  |  |  |  |  |  |  |  |
| LOC331243     | ILMN_1253944 | 0.0010507 | 0.0069681 | 0.9739024 | 0.5800158 | 0.0053713 | 0.0203677 | 5.580336667 | 5.652857895 | 5.641372059 | 5.5795      |  |  |  |  |  |  |  |  |
| RAB33A        | ILMN_3161828 | 0.0416086 | 0.0465199 | 0.2932489 | 0.9090289 | 0.0047756 | 0.0042555 | 6.031763333 | 6.095615789 | 6.092541176 | 5.987954545 |  |  |  |  |  |  |  |  |
| DTYMK         | ILMN_2485787 | 0.0031272 | 0.0030314 | 0.7272849 | 0.5458658 | 0.013986  | 0.0194651 | 10.10785    | 10.17909737 | 10.16820147 | 10.11717727 |  |  |  |  |  |  |  |  |
| LOC100040244  | ILMN_1260579 | 0.0088602 | 0.020958  | 0.5320051 | 0.3202183 | 0.0050246 | 0.0067198 | 7.19639     | 7.280847368 | 7.256533824 | 7.172322727 |  |  |  |  |  |  |  |  |
| OS9           | ILMN_1246758 | 0.001885  | 0.0232342 | 0.953676  | 0.0875945 | 0.0014605 | 0.0229501 | 9.561276667 | 9.660952632 | 9.621010294 | 9.559304545 |  |  |  |  |  |  |  |  |
| D630011N09RIK | ILMN_2580554 | 0.0458818 | 0.0133375 | 0.7643319 | 0.8662868 | 0.0308974 | 0.0091603 | 5.565416667 | 5.621328947 | 5.624910294 | 5.555445455 |  |  |  |  |  |  |  |  |
| A930014D08RIK | ILMN_2519658 | 0.0486271 | 0.0149848 | 0.7406188 | 0.7386258 | 0.0170917 | 0.0065284 | 5.644493333 | 5.696589474 | 5.703229412 | 5.633840909 |  |  |  |  |  |  |  |  |
| MYNN          | ILMN_1213772 | 0.005896  | 0.0112655 | 0.7696081 | 0.4883202 | 0.0167039 | 0.0408157 | 5.760286667 | 5.832828947 | 5.818648529 | 5.768645455 |  |  |  |  |  |  |  |  |
| SPNB2         | ILMN_2681429 | 0.0326787 | 0.0349451 | 0.494234  | 0.9290664 | 0.0183645 | 0.0165316 | 5.695196667 | 5.750415789 | 5.752666176 | 5.672931818 |  |  |  |  |  |  |  |  |
| RNF19A        | ILMN_2424138 | 0.0259662 | 0.0486041 | 0.5380445 | 0.2509639 | 0.0039359 | 0.0041805 | 5.905073333 | 5.992334211 | 5.962323529 | 5.879622727 |  |  |  |  |  |  |  |  |
| ARHGAP25      | ILMN_3155245 | 0.0295298 | 0.0173066 | 0.6025104 | 0.3814893 | 0.0219848 | 0.0069411 | 10.10459    | 10.18453947 | 10.16155    | 10.08619091 |  |  |  |  |  |  |  |  |
| LOC383433     | ILMN_2539526 | 0.0047365 | 0.0187802 | 0.9159006 | 0.6490296 | 0.0237397 | 0.0465046 | 5.61099     | 5.677026316 | 5.666641176 | 5.608054545 |  |  |  |  |  |  |  |  |
| MIER2         | ILMN_2671319 | 0.0361367 | 0.023984  | 0.4798676 | 0.8055656 | 0.0058249 | 0.0029736 | 5.829166667 | 5.889905263 | 5.884575    | 5.805927273 |  |  |  |  |  |  |  |  |
| PDIA2         | ILMN_1215125 | 0.0186685 | 0.0423804 | 0.7095586 | 0.4244174 | 0.0202628 | 0.0335745 | 5.79263     | 5.866986842 | 5.846214706 | 5.779913636 |  |  |  |  |  |  |  |  |
| LOC384990     | ILMN_1218114 | 0.011363  | 0.0354083 | 0.8320832 | 0.4519395 | 0.003319  | 0.02169   | 5.856243333 | 5.924778947 | 5.908864706 | 5.849868182 |  |  |  |  |  |  |  |  |
| LOC100043391  | ILMN_2740432 | 0.0095943 | 0.0466303 | 0.4380002 | 0.3030988 | 0.0011218 | 0.0060576 | 14.24296667 | 14.31736842 | 14.29466324 | 14.21495    |  |  |  |  |  |  |  |  |
| LOC100040854  | ILMN_1217820 | 0.0326164 | 0.0323291 | 0.2727063 | 0.8371501 | 0.0029163 | 0.0050089 | 5.568043333 | 5.614126316 | 5.618561765 | 5.542736364 |  |  |  |  |  |  |  |  |
| PIGN          | ILMN_2547482 | 0.0364563 | 0.0260185 | 0.5514131 | 0.6893077 | 0.0133012 | 0.0065321 | 5.77965     | 5.838668421 | 5.830154412 | 5.7613      |  |  |  |  |  |  |  |  |
| BAZ1B         | ILMN_1246235 | 0.0140452 | 0.0213284 | 0.8925962 | 0.4231022 | 0.0251839 | 0.0323462 | 5.625716667 | 5.692768421 | 5.676020588 | 5.621545455 |  |  |  |  |  |  |  |  |
| TLL4          | ILMN_1251995 | 0.0092136 | 0.0435202 | 0.7539064 | 0.304508  | 0.0088891 | 0.0333676 | 5.922753333 | 5.996405263 | 5.973054412 | 5.912381818 |  |  |  |  |  |  |  |  |
| DHX32         | ILMN_2643150 | 0.008995  | 0.0495151 | 0.908182  | 0.1918829 | 0.0093641 | 0.0494344 | 8.92933     | 9.010481579 | 8.979463235 | 8.9256      |  |  |  |  |  |  |  |  |
| D4ERTD22E     | ILMN_3129206 | 0.0019254 | 0.0170709 | 0.9452562 | 0.2197383 | 0.0067388 | 0.0350192 | 11.32444333 | 11.39864211 | 11.37389118 | 11.32272727 |  |  |  |  |  |  |  |  |
| LOC100048816  | ILMN_1253242 | 0.0063968 | 0.045496  | 0.7887721 | 0.1342978 | 0.0118965 | 0.047928  | 5.880436667 | 5.965505263 | 5.928376471 | 5.871918182 |  |  |  |  |  |  |  |  |
| GPC3          | ILMN_1223663 | 0.0124212 | 0.0402583 | 0.8858477 | 0.4679769 | 0.0112841 | 0.0427004 | 5.648313333 | 5.711607895 | 5.695651471 | 5.644954545 |  |  |  |  |  |  |  |  |
| LOC384585     | ILMN_2413863 | 0.0045598 | 0.0345773 | 0.8653368 | 0.2046214 | 0.0064519 | 0.0377219 | 5.716866667 | 5.787997368 | 5.764117647 | 5.711304545 |  |  |  |  |  |  |  |  |
| OLFR701       | ILMN_2652694 | 0.0185923 | 0.0489834 | 0.7172779 | 0.2030837 | 0.0160646 | 0.0278697 | 5.69437     | 5.76715     | 5.738292647 | 5.683054545 |  |  |  |  |  |  |  |  |
| FANCA         | ILMN_1220189 | 0.0186167 | 0.0465428 | 0.8057021 | 0.3372639 | 0.0143651 | 0.0332572 | 5.56208     | 5.625584211 | 5.605772059 | 5.55515     |  |  |  |  |  |  |  |  |

**DOWN IN GA AND REF ONLY**

| Gene      | ID           | Medium vs. Reference Standard pval | Medium vs. GA pval | Medium vs generic pval | Reference Standard vs GA pval | Reference Standard vs generic pval | GA vs. generic pval | AVG Medium  | AVG Reference Standard | AVG GA      | AVG generic |   |   |  |   |  |  |  |  |                              |
|-----------|--------------|------------------------------------|--------------------|------------------------|-------------------------------|------------------------------------|---------------------|-------------|------------------------|-------------|-------------|---|---|--|---|--|--|--|--|------------------------------|
| LOC386360 | ILMN_2538531 | 0.0018127                          | 1.306E-06          | 0.2417974              | 0.0610866                     | 0.0476618                          | 0.000511            | 9.76067     | 9.543934211            | 9.445438235 | 9.669977273 |   |   |  |   |  |  |  |  |                              |
| CLEC4E    | ILMN_1216972 | 2.388E-08                          | 1.799E-08          | 0.2913318              | 0.0720895                     | 0.0001058                          | 0.0003322           | 7.003983333 | 6.697260526            | 6.759897059 | 6.9338      |   |   |  |   |  |  |  |  |                              |
| LOC385923 | ILMN_1230140 | 0.0023267                          | 9.85E-06           | 0.8804496              | 0.3573459                     | 0.0011591                          | 5.702E-06           | 7.89017     | 7.690592105            | 7.650747059 | 7.901590909 |   |   |  |   |  |  |  |  | Pattern Represented by Data: |
| CSF3R     | ILMN_2806180 | 2.719E-06                          | 2.468E-08          | 0.19436                | 0.7656032                     | 0.0026131                          | 0.0003455           | 6.042593333 | 5.823492105            | 5.813885294 | 5.969613636 |   |   |  |   |  |  |  |  |                              |
| CD33      | ILMN_2675223 | 2.257E-09                          | 2.981E-09          | 0.333232               | 0.1662516                     | 1.498E-05                          | 4.529E-05           | 6.606853333 | 6.339052632            | 6.381583824 | 6.556072727 | x |   |  |   |  |  |  |  | x                            |
| CD63      | ILMN_3128907 | 9.578E-05                          | 4.55E-06           | 0.4543748              | 0.9659952                     | 0.0029774                          | 0.0006786           | 7.70484     | 7.482515789            | 7.484204412 | 7.655954545 |   | x |  | x |  |  |  |  |                              |

|                |              |           |           |           |           |           |           |             |             |             |             |  |        |           |    |         |
|----------------|--------------|-----------|-----------|-----------|-----------|-----------|-----------|-------------|-------------|-------------|-------------|--|--------|-----------|----|---------|
| CXCR4          | ILMN_2630459 | 4.166E-07 | 2.333E-05 | 0.4582274 | 0.1836911 | 0.0003531 | 0.0051366 | 9.36576     | 9.097465789 | 9.153819118 | 9.316654545 |  | Medium | Reference | GA | generic |
| AA536749       | ILMN_1219077 | 3.09E-09  | 1.346E-08 | 0.0549268 | 0.8219967 | 0.0002312 | 0.0010926 | 8.959366667 | 8.7437      | 8.750286765 | 8.878977273 |  |        |           |    |         |
| LOC386268      | ILMN_1222988 | 0.0190164 | 8.09E-05  | 0.6845559 | 0.2041966 | 0.0323632 | 0.0001997 | 6.859343333 | 6.705134211 | 6.655375    | 6.828495455 |  |        |           |    |         |
| genericL5      | ILMN_1250635 | 3.881E-05 | 9.224E-09 | 0.2094099 | 0.1806939 | 0.0422933 | 0.0008516 | 6.407056667 | 6.252378947 | 6.211517647 | 6.348690909 |  |        |           |    |         |
| GA57           | ILMN_2776850 | 2.885E-06 | 1.144E-06 | 0.5756013 | 0.9274013 | 3.971E-05 | 7.879E-05 | 6.87571     | 6.687760526 | 6.685158824 | 6.846809091 |  |        |           |    |         |
| KLC4           | ILMN_1251301 | 3.915E-08 | 6.955E-10 | 0.1139408 | 0.8462085 | 0.0019125 | 0.0005706 | 7.976776667 | 7.781668421 | 7.786357353 | 7.905563636 |  |        |           |    |         |
| LOC386288      | ILMN_1257784 | 0.0001885 | 2.933E-05 | 0.1046022 | 0.9683232 | 0.0425433 | 0.0459418 | 7.19565     | 7.004444737 | 7.005695588 | 7.089990909 |  |        |           |    |         |
| TMEM388        | ILMN_2795791 | 7.322E-07 | 5.939E-09 | 0.1176012 | 0.6402061 | 0.0038277 | 0.0004492 | 8.486633333 | 8.312155263 | 8.299532353 | 8.423818182 |  |        |           |    |         |
| GPR97          | ILMN_2666492 | 1.03E-05  | 1.079E-06 | 0.2142425 | 0.6849131 | 0.0042059 | 0.0017393 | 6.329983333 | 6.156044737 | 6.1434      | 6.272113636 |  |        |           |    |         |
| 1100001G20RIK  | ILMN_2651743 | 7.743E-06 | 9.245E-06 | 0.2289623 | 0.5387134 | 0.0009023 | 0.003214  | 6.425286667 | 6.217157895 | 6.238989706 | 6.366827273 |  |        |           |    |         |
| APP            | ILMN_2597532 | 1.738E-06 | 1.913E-07 | 0.0563277 | 0.7760063 | 0.0043673 | 0.0041235 | 7.13296     | 6.940878947 | 6.949335294 | 7.052945455 |  |        |           |    |         |
| 4930572J05RIK  | ILMN_3065373 | 0.004566  | 2.51E-05  | 0.4441944 | 0.5165798 | 0.0407129 | 0.0014263 | 10.59237333 | 10.43747105 | 10.41293676 | 10.54924091 |  |        |           |    |         |
| TGIF1          | ILMN_1253854 | 0.0008531 | 0.0001751 | 0.5099102 | 0.8326892 | 0.0121542 | 0.006438  | 8.40255     | 8.232644737 | 8.224369118 | 8.362318182 |  |        |           |    |         |
| LOC243025      | ILMN_1252253 | 2.074E-06 | 5.102E-08 | 0.0659736 | 0.738499  | 0.0069137 | 0.002064  | 6.799403333 | 6.631713158 | 6.622926471 | 6.726436364 |  |        |           |    |         |
| SEC16A         | ILMN_1225772 | 0.0001219 | 2.523E-08 | 0.0500137 | 0.2232897 | 0.0485284 | 0.0008313 | 10.14415    | 10.00321316 | 9.968227941 | 10.07729545 |  |        |           |    |         |
| BC014795       | ILMN_2769945 | 1.451E-06 | 1.478E-07 | 0.3549454 | 0.9218641 | 0.0006014 | 0.0002032 | 8.22279     | 8.047292105 | 8.050194118 | 8.188168182 |  |        |           |    |         |
| CFB            | ILMN_1230853 | 6.194E-05 | 0.0001335 | 0.2759896 | 0.2823461 | 0.0011429 | 0.0118492 | 6.413743333 | 6.207484211 | 6.243664706 | 6.349068182 |  |        |           |    |         |
| TMEM63A        | ILMN_2798340 | 0.0001154 | 4.004E-06 | 0.0785413 | 0.3188699 | 0.0288569 | 0.0052776 | 7.836176667 | 7.698636842 | 7.666680882 | 7.774609091 |  |        |           |    |         |
| DNMT3L         | ILMN_1250149 | 0.000214  | 7.511E-08 | 0.4818082 | 0.1380166 | 0.0117734 | 8.102E-05 | 6.21078     | 6.081707895 | 6.041905882 | 6.181622727 |  |        |           |    |         |
| ACBD4          | ILMN_3150296 | 0.000222  | 1.276E-06 | 0.1850789 | 0.3888446 | 0.0273003 | 0.0020199 | 9.321576667 | 9.179684211 | 9.154017647 | 9.266631818 |  |        |           |    |         |
| ORF19          | ILMN_3158633 | 5.139E-07 | 1.061E-06 | 0.0627275 | 0.2847864 | 0.0024954 | 0.0154805 | 7.046476667 | 6.849634211 | 6.879329412 | 6.964309091 |  |        |           |    |         |
| CREG1          | ILMN_1239638 | 8.391E-06 | 1.506E-07 | 0.3754579 | 0.901707  | 0.0011917 | 0.0001639 | 6.78207     | 6.618634211 | 6.615505882 | 6.743304545 |  |        |           |    |         |
| IRAK3          | ILMN_1253972 | 0.0001809 | 8.622E-05 | 0.253004  | 0.7292535 | 0.0166538 | 0.013528  | 9.18481     | 9.031655263 | 9.019070588 | 9.132704545 |  |        |           |    |         |
| BC065397       | ILMN_2869654 | 5.829E-06 | 2.907E-06 | 0.0546624 | 0.8079099 | 0.0116688 | 0.0182155 | 6.624853333 | 6.452586842 | 6.459883824 | 6.546759091 |  |        |           |    |         |
| ARHGAP22       | ILMN_2672380 | 8.766E-06 | 5.386E-07 | 0.0546356 | 0.2706834 | 0.0222117 | 0.0325518 | 6.35587     | 6.161063158 | 6.192420588 | 6.264263636 |  |        |           |    |         |
| GAA            | ILMN_1254199 | 1.191E-06 | 3.867E-07 | 0.1415128 | 0.7057601 | 0.0094359 | 0.0087814 | 8.179186667 | 8.011515789 | 8.021354412 | 8.115145455 |  |        |           |    |         |
| LOC386117      | ILMN_1218079 | 0.0021792 | 2.843E-05 | 0.3134162 | 0.7582608 | 0.0352915 | 0.0033238 | 7.206693333 | 7.060794737 | 7.051636765 | 7.15335     |  |        |           |    |         |
| 5031414D18RIK  | ILMN_2615575 | 2.202E-05 | 3.713E-05 | 0.2478778 | 0.9464672 | 0.0097416 | 0.0141411 | 8.621983333 | 8.465123684 | 8.467298529 | 8.571345455 |  |        |           |    |         |
| IRF3           | ILMN_1229320 | 8.067E-05 | 1.532E-05 | 0.4024593 | 0.3891754 | 0.0015421 | 0.0010372 | 7.902646667 | 7.720826316 | 7.748907353 | 7.866604545 |  |        |           |    |         |
| IGLC2_00595_IG | ILMN_2450155 | 8.145E-07 | 7.282E-07 | 0.9855599 | 0.9370753 | 5.83E-05  | 3.367E-05 | 13.84993333 | 13.69477895 | 13.69675147 | 13.85070455 |  |        |           |    |         |
| BRD2           | ILMN_3154409 | 0.0002138 | 1.179E-06 | 0.0923399 | 0.6287476 | 0.0458714 | 0.0058528 | 11.40748667 | 11.26870789 | 11.25570735 | 11.342      |  |        |           |    |         |
| SRGAP2         | ILMN_1222560 | 6.014E-09 | 4.043E-08 | 0.0553814 | 0.1020981 | 0.0005129 | 0.0063007 | 7.94865     | 7.758986842 | 7.797158824 | 7.879281818 |  |        |           |    |         |
| ZFP36L1        | ILMN_2780424 | 6.224E-05 | 2.451E-07 | 0.6304486 | 0.3087586 | 0.0058726 | 0.0001596 | 13.96748    | 13.84238684 | 13.81608971 | 13.94897273 |  |        |           |    |         |
| MYO7A          | ILMN_1251839 | 8.979E-06 | 6.809E-06 | 0.0603573 | 0.4475788 | 0.0125491 | 0.0294065 | 6.819533333 | 6.64505     | 6.668164706 | 6.745968182 |  |        |           |    |         |
| LOC382163      | ILMN_1237356 | 2.994E-05 | 2.225E-05 | 0.069729  | 0.3075783 | 0.0097309 | 0.0386567 | 6.892846667 | 6.712444737 | 6.742497059 | 6.811872727 |  |        |           |    |         |
| LOC238836      | ILMN_2527694 | 2.39E-06  | 1.106E-08 | 0.1321515 | 0.9052961 | 0.0021451 | 0.0001942 | 13.98839    | 13.84113421 | 13.83827941 | 13.94409091 |  |        |           |    |         |
| HRSP12         | ILMN_2610706 | 0.000479  | 0.0002885 | 0.1980366 | 0.6597663 | 0.0250265 | 0.0430031 | 8.18713     | 8.021755263 | 8.037048529 | 8.120886364 |  |        |           |    |         |
| GPS2           | ILMN_2730784 | 0.0004475 | 1.596E-06 | 0.4350748 | 0.4181621 | 0.0063659 | 0.0001654 | 9.44959     | 9.323986842 | 9.303297059 | 9.419718182 |  |        |           |    |         |
| DLG3           | ILMN_2993836 | 0.0001248 | 9.253E-05 | 0.3256219 | 0.4930922 | 0.0013149 | 0.0041559 | 7.168773333 | 7.001178947 | 7.022592647 | 7.125568182 |  |        |           |    |         |
| 2810402K13RIK  | ILMN_2455390 | 6.719E-08 | 2.192E-05 | 0.0913756 | 0.1673436 | 0.0016301 | 0.039087  | 8.3151      | 8.126965789 | 8.169489706 | 8.250713636 |  |        |           |    |         |
| SHC1           | ILMN_2957070 | 9.867E-06 | 9.733E-08 | 0.2366389 | 0.3299388 | 0.004558  | 0.0003176 | 11.17267667 | 11.05177105 | 11.02947353 | 11.13645    |  |        |           |    |         |
| GALNT10        | ILMN_2750011 | 0.0001616 | 4.031E-07 | 0.104016  | 0.5181983 | 0.0287723 | 0.002004  | 8.239243333 | 8.110673684 | 8.096067647 | 8.178859091 |  |        |           |    |         |
| IVD            | ILMN_2728379 | 1.878E-05 | 5.595E-07 | 0.0979153 | 0.535807  | 0.0116603 | 0.0061067 | 9.353073333 | 9.195634211 | 9.211955882 | 9.293895455 |  |        |           |    |         |
| RING1          | ILMN_2932539 | 0.0166343 | 1.051E-05 | 0.3802927 | 0.0714105 | 0.0023204 | 7.68E-07  | 8.797403333 | 8.707202632 | 8.656370588 | 8.835413636 |  |        |           |    |         |
| LOC100048105   | ILMN_2588050 | 0.0009383 | 7.735E-08 | 0.4573259 | 0.1055718 | 0.0231541 | 5.683E-05 | 13.31449667 | 13.21344474 | 13.17428971 | 13.29137273 |  |        |           |    |         |
| CLEC4B1        | ILMN_2603898 | 0.0006499 | 8.9E-05   | 0.9443595 | 0.5312531 | 0.0009063 | 0.0001392 | 6.123163333 | 5.964173684 | 5.98355     | 6.126754545 |  |        |           |    |         |
| TYROBP         | ILMN_2867147 | 4.99E-05  | 0.0008134 | 0.324192  | 0.0823907 | 0.0009292 | 0.0372652 | 7.546993333 | 7.352484211 | 7.408191176 | 7.491804545 |  |        |           |    |         |
| 6230425C21RIK  | ILMN_2550095 | 3.373E-05 | 0.0011633 | 0.7674495 | 0.2234885 | 0.000104  | 0.0019545 | 7.159243333 | 6.973836842 | 7.021026471 | 7.173704545 |  |        |           |    |         |
| 2810422O20RIK  | ILMN_2625188 | 0.006333  | 2.944E-05 | 0.8078838 | 0.4390216 | 0.0151682 | 0.0001763 | 7.155133333 | 7.041215789 | 7.017935294 | 7.145077273 |  |        |           |    |         |
| RFFL           | ILMN_3048689 | 0.0021843 | 9.005E-05 | 0.946882  | 0.4492621 | 0.007551  | 0.0007013 | 7.346986667 | 7.233876316 | 7.211079412 | 7.344081818 |  |        |           |    |         |
| CEPT1          | ILMN_2762334 | 0.0001535 | 3.503E-06 | 0.1512639 | 0.263014  | 0.0316096 | 0.0044622 | 10.36051667 | 10.25173158 | 10.22485441 | 10.31255909 |  |        |           |    |         |
| NEURL          | ILMN_2625940 | 1.943E-05 | 2.977E-06 | 0.0798984 | 0.5182001 | 0.0333122 | 0.0413976 | 6.091016667 | 5.940726316 | 5.956220588 | 6.018363636 |  |        |           |    |         |
| ZFP317         | ILMN_2481799 | 0.0004084 | 2.047E-05 | 0.174213  | 0.792748  | 0.0368688 | 0.0129862 | 7.35243     | 7.224565789 | 7.217720588 | 7.297       |  |        |           |    |         |
| SRGAP3         | ILMN_2648098 | 0.0042644 | 4.08E-06  | 0.5674557 | 0.0712274 | 0.0457434 | 0.0004358 | 6.20861     | 6.119747368 | 6.074486765 | 6.187718182 |  |        |           |    |         |
| RARG           | ILMN_3132660 | 0.0002313 | 0.0001074 | 0.0961102 | 0.4564491 | 0.0249151 | 0.0481685 | 6.253086667 | 6.097884211 | 6.120816176 | 6.186990909 |  |        |           |    |         |
| PI4KB          | ILMN_2689259 | 0.0001833 | 0.0002821 | 0.9041754 | 0.561224  | 0.0010439 | 0.0018446 | 9.675126667 | 9.524628947 | 9.544104412 | 9.670277273 |  |        |           |    |         |
| GALGT1         | ILMN_1241182 | 0.00356   | 0.0002267 | 0.9638047 | 0.6243123 | 0.0045697 | 0.0005737 | 7.578576667 | 7.461855263 | 7.448160294 | 7.576309091 |  |        |           |    |         |
| PIK3R6         | ILMN_3160107 | 0.0007543 | 0.0009593 | 0.9801863 | 0.7352984 | 0.0019019 | 0.003175  | 6.473133333 | 6.331334211 | 6.342902941 | 6.471927273 |  |        |           |    |         |
| MREG           | ILMN_2976159 | 0.0115112 | 0.0012188 | 0.9705235 | 0.5417462 | 0.0076726 | 0.0014909 | 9.009966667 | 8.899078947 | 8.880347059 | 9.012027273 |  |        |           |    |         |
| 1200002N14RIK  | ILMN_1219820 | 0.0001629 | 0.0008928 | 0.3547823 | 0.7228022 | 6.796E-06 | 7.945E-05 | 7.02541     | 6.885213158 | 6.896238235 | 7.071472727 |  |        |           |    |         |

|                 |              |           |           |           |           |           |           |             |             |             |             |  |  |  |  |  |  |  |  |
|-----------------|--------------|-----------|-----------|-----------|-----------|-----------|-----------|-------------|-------------|-------------|-------------|--|--|--|--|--|--|--|--|
| 2610028H07RIK   | ILMN_1256792 | 6.346E-06 | 0.0004463 | 0.5340537 | 0.1787544 | 8.318E-05 | 0.0082396 | 10.22659    | 10.05706053 | 10.09811029 | 10.20060909 |  |  |  |  |  |  |  |  |
| TGFB1           | ILMN_2727663 | 9.323E-05 | 0.0050672 | 0.6968583 | 0.0791519 | 0.0001869 | 0.023865  | 6.317396667 | 6.125718421 | 6.189858824 | 6.294936364 |  |  |  |  |  |  |  |  |
| NOS3            | ILMN_2788593 | 0.000145  | 3.643E-05 | 0.1428581 | 0.8181436 | 0.0230466 | 0.0166585 | 5.930473333 | 5.810139474 | 5.804051471 | 5.8815      |  |  |  |  |  |  |  |  |
| USP11           | ILMN_2802244 | 0.0008445 | 0.0003972 | 0.5473493 | 0.5743512 | 0.004636  | 0.0065853 | 6.548856667 | 6.408394737 | 6.422813235 | 6.516695455 |  |  |  |  |  |  |  |  |
| FOS             | ILMN_2750515 | 0.0141545 | 0.0005959 | 0.5054332 | 0.2872521 | 0.0012599 | 5.304E-05 | 6.993933333 | 6.903897368 | 6.874805882 | 7.035045455 |  |  |  |  |  |  |  |  |
| LOC636818       | ILMN_2434512 | 0.0003839 | 1.14E-05  | 0.1989409 | 0.6183528 | 0.0377477 | 0.0083799 | 6.108246667 | 5.997428947 | 5.985791176 | 6.062581818 |  |  |  |  |  |  |  |  |
| SCL0004023.1_57 | ILMN_1232512 | 0.0002673 | 3.147E-05 | 0.7143189 | 0.744648  | 0.0027804 | 0.0008174 | 6.11199     | 5.997631579 | 5.989891176 | 6.097618182 |  |  |  |  |  |  |  |  |
| P2RX4           | ILMN_2620122 | 0.0008163 | 0.0008309 | 0.3786311 | 0.7185532 | 0.0119073 | 0.0036112 | 7.48024     | 7.348384211 | 7.358327941 | 7.436886364 |  |  |  |  |  |  |  |  |
| DGKQ            | ILMN_2972541 | 0.0004892 | 0.0005204 | 0.2695177 | 0.5259959 | 0.021019  | 0.0477871 | 7.016946667 | 6.876660526 | 6.895120588 | 6.966136364 |  |  |  |  |  |  |  |  |
| SNX15           | ILMN_2894450 | 0.0093703 | 4.642E-05 | 0.2424838 | 0.0859399 | 0.0001601 | 6.063E-07 | 9.416226667 | 9.335971053 | 9.294445588 | 9.462340909 |  |  |  |  |  |  |  |  |
| SLC11A1         | ILMN_2692797 | 0.0039669 | 0.0019783 | 0.2622018 | 0.8324263 | 0.0002494 | 5.829E-05 | 6.549723333 | 6.422       | 6.429011765 | 6.614281818 |  |  |  |  |  |  |  |  |
| TLR13           | ILMN_2735961 | 2.319E-06 | 5.548E-05 | 0.2313394 | 0.0527093 | 0.0014045 | 0.0272525 | 6.13844     | 5.968510526 | 6.018579412 | 6.089945455 |  |  |  |  |  |  |  |  |
| MKL1            | ILMN_2630120 | 0.0001341 | 0.0001303 | 0.2256236 | 0.6549713 | 0.0148592 | 0.0273433 | 6.422093333 | 6.290807895 | 6.302858824 | 6.376204545 |  |  |  |  |  |  |  |  |
| EG633640        | ILMN_2977390 | 0.0021632 | 1.049E-05 | 0.3706096 | 0.1302664 | 0.0233458 | 0.0008458 | 6.2549      | 6.167321053 | 6.135855882 | 6.224536364 |  |  |  |  |  |  |  |  |
| RASGRF1         | ILMN_1233146 | 6.199E-05 | 1.771E-05 | 0.1825115 | 0.6972638 | 0.041397  | 0.038674  | 5.882463333 | 5.754576316 | 5.763907353 | 5.8296      |  |  |  |  |  |  |  |  |
| TRP53           | ILMN_2466845 | 0.0016928 | 0.0028691 | 0.9923206 | 0.7914076 | 0.0107981 | 0.0131019 | 9.81586     | 9.688071053 | 9.697814706 | 9.816331818 |  |  |  |  |  |  |  |  |
| 1300010F03RIK   | ILMN_1249480 | 0.0020903 | 0.0002448 | 0.9590157 | 0.5945485 | 0.0017402 | 0.0005547 | 6.72106     | 6.618107895 | 6.603588235 | 6.719240909 |  |  |  |  |  |  |  |  |
| RNF123          | ILMN_2975900 | 0.0019712 | 0.0067338 | 0.6879115 | 0.5482232 | 0.0095547 | 0.0405204 | 7.61357     | 7.475247368 | 7.4966      | 7.591468182 |  |  |  |  |  |  |  |  |
| LOC386085       | ILMN_1258858 | 0.007037  | 0.0024479 | 0.9931001 | 0.6718008 | 0.0234216 | 0.0099114 | 6.32579     | 6.223992105 | 6.209532353 | 6.326190909 |  |  |  |  |  |  |  |  |
| TMM8A2          | ILMN_2983631 | 0.0004798 | 7.984E-05 | 0.2601703 | 0.9288078 | 0.0408017 | 0.0257747 | 5.952686667 | 5.835228947 | 5.837423529 | 5.907509091 |  |  |  |  |  |  |  |  |
| CLEC4A1         | ILMN_1230708 | 6.31E-05  | 0.0006805 | 0.0795917 | 0.1389685 | 6.292E-07 | 1.122E-06 | 6.377566667 | 6.218557895 | 6.262733824 | 6.464059091 |  |  |  |  |  |  |  |  |
| SGPL1           | ILMN_2936380 | 0.0044252 | 0.0043183 | 0.2442032 | 0.8397745 | 1.199E-05 | 5.429E-05 | 7.595083333 | 7.473997368 | 7.480830882 | 7.646777273 |  |  |  |  |  |  |  |  |
| TMUB1           | ILMN_2932660 | 3.677E-06 | 2.867E-06 | 0.558543  | 0.1829473 | 9.601E-05 | 0.0001669 | 8.66402     | 8.519415789 | 8.549851471 | 8.647472727 |  |  |  |  |  |  |  |  |
| LOC383099       | ILMN_1230327 | 1.029E-05 | 3.432E-05 | 0.1935341 | 0.3577611 | 0.0026485 | 0.0131515 | 13.25080333 | 13.11434737 | 13.13688529 | 13.20990455 |  |  |  |  |  |  |  |  |
| HMOX1           | ILMN_2788073 | 0.001442  | 0.0136072 | 0.5259227 | 0.119158  | 0.0001286 | 0.0015021 | 6.674133333 | 6.506121053 | 6.561204412 | 6.718672727 |  |  |  |  |  |  |  |  |
| ERCC4           | ILMN_1259904 | 2.964E-05 | 7.189E-06 | 0.3072808 | 0.3937884 | 0.0020401 | 0.0019043 | 8.262506667 | 8.1301      | 8.150180882 | 8.232518182 |  |  |  |  |  |  |  |  |
| SOLH            | ILMN_2508416 | 4.953E-05 | 0.0003794 | 0.3919807 | 0.1710492 | 0.0051436 | 0.0319132 | 8.064173333 | 7.913865789 | 7.952263235 | 8.027909091 |  |  |  |  |  |  |  |  |
| PREP            | ILMN_2549494 | 8.777E-06 | 7.108E-06 | 0.0728319 | 0.9469909 | 0.0319696 | 0.0397581 | 8.029716667 | 7.916678947 | 7.918044118 | 7.973690909 |  |  |  |  |  |  |  |  |
| LOC100048105    | ILMN_1220172 | 0.0052534 | 5.023E-06 | 0.6515084 | 0.1045044 | 0.0379376 | 0.0003052 | 13.58104    | 13.50723421 | 13.47030735 | 13.56905    |  |  |  |  |  |  |  |  |
| GSTM2           | ILMN_1251449 | 1.074E-06 | 0.0004294 | 0.6287192 | 0.0626658 | 0.000349  | 0.0162208 | 6.0557      | 5.898139474 | 5.945163235 | 6.033840909 |  |  |  |  |  |  |  |  |
| EPB4_1L3        | ILMN_1244272 | 0.0004236 | 0.0002688 | 0.976221  | 0.7535251 | 0.0023433 | 0.0015975 | 6.005856667 | 5.903615789 | 5.895541176 | 6.006977273 |  |  |  |  |  |  |  |  |
| USP22           | ILMN_2990220 | 0.0004797 | 7.218E-05 | 0.6311193 | 0.7329412 | 0.000109  | 2.996E-05 | 9.1675      | 9.065165789 | 9.057348529 | 9.184159091 |  |  |  |  |  |  |  |  |
| 1700073E17RIK   | ILMN_2790902 | 0.0009735 | 0.0010071 | 0.3318609 | 0.7923655 | 0.0272899 | 0.044332  | 5.778756667 | 5.660986842 | 5.668639706 | 5.740490909 |  |  |  |  |  |  |  |  |
| 1110014N23RIK   | ILMN_2737979 | 0.0003219 | 6.972E-05 | 0.2435055 | 0.9731238 | 0.0164781 | 0.0102902 | 9.78732     | 9.676873684 | 9.677741176 | 9.754181818 |  |  |  |  |  |  |  |  |
| RCCD1           | ILMN_2838629 | 0.0085449 | 0.0014522 | 0.9523493 | 0.722719  | 0.0029863 | 0.0011083 | 8.2828      | 8.183665789 | 8.173695588 | 8.285281818 |  |  |  |  |  |  |  |  |
| ANKRD13A        | ILMN_2613696 | 0.0048483 | 0.0016996 | 0.6333023 | 0.6372045 | 0.0118232 | 0.0117616 | 10.35183    | 10.25657632 | 10.24345    | 10.33284091 |  |  |  |  |  |  |  |  |
| SP2             | ILMN_2464693 | 0.0007692 | 0.0005217 | 0.6154789 | 0.8637588 | 0.0219028 | 0.0154119 | 6.97502     | 6.871657895 | 6.866919118 | 6.955763636 |  |  |  |  |  |  |  |  |
| CENTG3          | ILMN_2754596 | 0.0008539 | 0.0066436 | 0.763363  | 0.2648393 | 0.0048462 | 0.0324186 | 6.891463333 | 6.743584211 | 6.784157353 | 6.877472727 |  |  |  |  |  |  |  |  |
| 3110004L2ORIK   | ILMN_3142391 | 0.0049306 | 0.0008978 | 0.8322505 | 0.8607587 | 0.0011876 | 0.000386  | 6.040683333 | 5.938431579 | 5.933769118 | 6.049186364 |  |  |  |  |  |  |  |  |
| 6430526N21RIK   | ILMN_2556989 | 3.656E-06 | 0.0030831 | 0.8062834 | 0.0539703 | 0.0001224 | 0.0205043 | 7.338353333 | 7.170902632 | 7.231635294 | 7.327745455 |  |  |  |  |  |  |  |  |
| 2310067B10RIK   | ILMN_1245489 | 0.0001095 | 0.0021206 | 0.7045481 | 0.149667  | 0.0018865 | 0.0207657 | 7.60857     | 7.454689474 | 7.501908824 | 7.593022727 |  |  |  |  |  |  |  |  |
| 1810030N24RIK   | ILMN_1246756 | 0.0003314 | 0.0001049 | 0.2577743 | 0.7731788 | 0.0265102 | 0.0253525 | 6.94621     | 6.833397368 | 6.840070588 | 6.905022727 |  |  |  |  |  |  |  |  |
| RBM15           | ILMN_2945275 | 0.0002016 | 1.119E-05 | 0.7625653 | 0.6260856 | 0.0011444 | 0.0001507 | 8.00761     | 7.891310526 | 7.901594118 | 7.997504545 |  |  |  |  |  |  |  |  |
| WWP2            | ILMN_1226970 | 0.0013163 | 1.969E-05 | 0.5181541 | 0.1754847 | 0.0010361 | 2.533E-05 | 8.939       | 8.862852632 | 8.833398529 | 8.9579      |  |  |  |  |  |  |  |  |
| 2610024M03RIK   | ILMN_1255611 | 0.0007512 | 1.988E-05 | 0.2769578 | 0.6245423 | 0.0372041 | 0.0073064 | 6.12332     | 6.027731579 | 6.018229412 | 6.085745455 |  |  |  |  |  |  |  |  |
| C430003P19RIK   | ILMN_2864393 | 0.0250093 | 0.0001025 | 0.7362257 | 0.1297357 | 0.0383753 | 0.0003539 | 9.67627     | 9.606163158 | 9.571339706 | 9.665418182 |  |  |  |  |  |  |  |  |
| BC066107        | ILMN_2903889 | 0.0013885 | 0.0011587 | 0.5229082 | 0.6611865 | 0.000228  | 0.000209  | 6.6825      | 6.565544737 | 6.577964706 | 6.707772727 |  |  |  |  |  |  |  |  |
| 3110082D06RIK   | ILMN_2512770 | 0.0008126 | 0.0002459 | 0.4191441 | 0.8789691 | 0.0183839 | 0.0115793 | 6.0938      | 5.993510526 | 5.989636765 | 6.068118182 |  |  |  |  |  |  |  |  |
| LYNX1           | ILMN_1256369 | 0.0042057 | 0.0007327 | 0.4998935 | 0.746914  | 0.0252748 | 0.0117316 | 8.635493333 | 8.522728947 | 8.531370588 | 8.607563636 |  |  |  |  |  |  |  |  |
| PRKCZ           | ILMN_1221045 | 0.0008677 | 0.0080558 | 0.8168499 | 0.1401794 | 0.0001141 | 0.0031619 | 7.069753333 | 6.920815789 | 6.966716176 | 7.081818182 |  |  |  |  |  |  |  |  |
| IGK-V33         | ILMN_1248308 | 0.0190094 | 0.0430061 | 0.8357281 | 0.7053464 | 0.0069368 | 0.0316055 | 10.09401333 | 9.976852632 | 9.992255882 | 10.10707727 |  |  |  |  |  |  |  |  |
| SLC11A1         | ILMN_2674884 | 0.0045173 | 0.0309152 | 0.1250275 | 0.1360546 | 1.786E-05 | 6.406E-05 | 6.997713333 | 6.838144737 | 6.896435294 | 7.107336364 |  |  |  |  |  |  |  |  |
| CBL             | ILMN_2738699 | 0.000129  | 0.0034848 | 0.5346577 | 0.1576133 | 0.0004127 | 0.0292504 | 5.966836667 | 5.825323684 | 5.865586765 | 5.941622727 |  |  |  |  |  |  |  |  |
| B930049N04RIK   | ILMN_2567282 | 0.0082852 | 0.0004187 | 0.7132546 | 0.6213679 | 0.0314128 | 0.00413   | 5.693346667 | 5.604668421 | 5.592219118 | 5.679722727 |  |  |  |  |  |  |  |  |
| CASP1           | ILMN_1247592 | 0.0365454 | 0.0002782 | 0.98551   | 0.1513468 | 0.0348947 | 0.0004103 | 11.61187333 | 11.54446316 | 11.51241912 | 11.61258182 |  |  |  |  |  |  |  |  |
| MBD1            | ILMN_2893081 | 0.0006904 | 0.0009885 | 0.9341784 | 0.4951872 | 0.0011696 | 0.0026387 | 9.107946667 | 8.991671053 | 9.009091176 | 9.104772727 |  |  |  |  |  |  |  |  |
| 2510022D24RIK   | ILMN_2431257 | 0.0005423 | 0.0005419 | 0.6621285 | 0.8555194 | 0.0096387 | 0.010535  | 8.239006667 | 8.136547368 | 8.141229412 | 8.224509091 |  |  |  |  |  |  |  |  |
| FRMPD1          | ILMN_2625610 | 0.0078477 | 8.549E-05 | 0.6896953 | 0.175579  | 0.0487525 | 0.0022095 | 5.682146667 | 5.613552632 | 5.584472059 | 5.669695455 |  |  |  |  |  |  |  |  |
| USP54           | ILMN_2418324 | 0.0095547 | 0.0004016 | 0.9885197 | 0.3747777 | 0.0098927 | 0.0008142 | 7.069403333 | 6.990452632 | 6.971775    | 7.068827273 |  |  |  |  |  |  |  |  |
| FA2H            | ILMN_2746783 | 0.0047186 | 0.0006321 | 0.4577042 | 0.9828413 | 0.0       |           |             |             |             |             |  |  |  |  |  |  |  |  |

|               |              |           |           |           |           |           |           |             |             |             |             |  |  |  |  |  |  |  |  |
|---------------|--------------|-----------|-----------|-----------|-----------|-----------|-----------|-------------|-------------|-------------|-------------|--|--|--|--|--|--|--|--|
| EG434402      | ILMN_2546510 | 0.0001282 | 5.523E-05 | 0.1356377 | 0.2699795 | 0.0095784 | 0.0185516 | 9.268486667 | 9.145802632 | 9.171463235 | 9.227836364 |  |  |  |  |  |  |  |  |
| SLC9A4        | ILMN_2732246 | 0.0021241 | 0.0001248 | 0.3842808 | 0.8904557 | 0.0274504 | 0.0068125 | 5.812063333 | 5.718157895 | 5.715114706 | 5.784231818 |  |  |  |  |  |  |  |  |
| ATP6V1B2      | ILMN_2680440 | 0.0331736 | 0.0026486 | 0.2271266 | 0.2349906 | 0.0020564 | 0.0001548 | 10.49800333 | 10.43401842 | 10.40123971 | 10.54807273 |  |  |  |  |  |  |  |  |
| 2310079N02RIK | ILMN_2635801 | 0.001275  | 7.915E-05 | 0.6000429 | 0.9085553 | 0.0144292 | 0.0029858 | 9.192623333 | 9.095097368 | 9.097661765 | 9.17595     |  |  |  |  |  |  |  |  |
| ZFPL1         | ILMN_1217262 | 0.0103109 | 0.0104877 | 0.4419646 | 0.8781598 | 0.0011273 | 0.0014541 | 7.48469     | 7.385313158 | 7.390122059 | 7.521240909 |  |  |  |  |  |  |  |  |
| NISCH         | ILMN_1237959 | 0.0004887 | 0.0022285 | 0.9947962 | 0.1362464 | 0.0013958 | 0.0054091 | 7.18114     | 7.045213158 | 7.087505882 | 7.181422727 |  |  |  |  |  |  |  |  |
| FCMD          | ILMN_2514924 | 0.0084295 | 0.0038963 | 0.9495455 | 0.6291816 | 0.0175612 | 0.0101721 | 6.566743333 | 6.486473684 | 6.473394118 | 6.569354545 |  |  |  |  |  |  |  |  |
| 1810009N02RIK | ILMN_2764607 | 0.0134778 | 0.0012708 | 0.1392451 | 0.5690381 | 0.0002188 | 7.598E-06 | 8.202653333 | 8.123931579 | 8.109642647 | 8.261063636 |  |  |  |  |  |  |  |  |
| 6720486H14RIK | ILMN_1232302 | 0.0136264 | 0.0004247 | 0.8667953 | 0.5443658 | 0.0422079 | 0.0033688 | 5.675496667 | 5.599039474 | 5.583961765 | 5.670122727 |  |  |  |  |  |  |  |  |
| AW011738      | ILMN_1248890 | 0.0210894 | 0.0024042 | 0.7444499 | 0.2578455 | 0.0466497 | 0.0126033 | 6.340756667 | 6.277447368 | 6.2494      | 6.329786364 |  |  |  |  |  |  |  |  |
| COgeneric     | ILMN_2596412 | 0.0028243 | 0.0022236 | 0.6376439 | 0.4780665 | 0.0154442 | 0.0199386 | 8.195383333 | 8.085518421 | 8.104542647 | 8.177086364 |  |  |  |  |  |  |  |  |
| PCBP2         | ILMN_2599777 | 0.0007785 | 0.0001023 | 0.3157339 | 0.7419453 | 0.0163777 | 0.0094039 | 12.72348667 | 12.62733947 | 12.63373235 | 12.69256364 |  |  |  |  |  |  |  |  |
| C330019G07RIK | ILMN_1256807 | 0.018907  | 0.0045064 | 0.9564866 | 0.8735275 | 0.0177015 | 0.0058732 | 6.827063333 | 6.742765789 | 6.738351471 | 6.829163636 |  |  |  |  |  |  |  |  |
| SMARCE1       | ILMN_2880246 | 0.0023537 | 0.0014714 | 0.5224221 | 0.4944281 | 0.0254248 | 0.032737  | 9.420046667 | 9.316405263 | 9.331558824 | 9.392968182 |  |  |  |  |  |  |  |  |
| ABCC4         | ILMN_2621708 | 0.0033419 | 0.0023598 | 0.8663787 | 0.882039  | 0.0096273 | 0.0096422 | 7.844656667 | 7.752781579 | 7.756655882 | 7.838990909 |  |  |  |  |  |  |  |  |
| GTBPB1        | ILMN_2510196 | 0.0094972 | 0.0163723 | 0.8623046 | 0.5356694 | 0.0083026 | 0.0160378 | 9.273093333 | 9.164928947 | 9.185194118 | 9.281127273 |  |  |  |  |  |  |  |  |
| SLC25A42      | ILMN_2810937 | 0.0030623 | 0.0038466 | 0.8626579 | 0.509224  | 0.007698  | 0.0080427 | 6.299283333 | 6.193821053 | 6.212104412 | 6.306677273 |  |  |  |  |  |  |  |  |
| 5830415F09RIK | ILMN_1223695 | 1.314E-05 | 0.0004369 | 0.2658477 | 0.1535108 | 0.0020511 | 0.0405941 | 7.08473     | 6.966402632 | 6.997625    | 7.052472727 |  |  |  |  |  |  |  |  |
| PEO1          | ILMN_2913845 | 0.000207  | 0.0037761 | 0.6475825 | 0.2792846 | 0.0032424 | 0.0364357 | 7.222113333 | 7.107710526 | 7.1356      | 7.205309091 |  |  |  |  |  |  |  |  |
| CRAC1         | ILMN_2764112 | 0.0314498 | 0.0050598 | 0.4815776 | 0.3443996 | 0.00865   | 0.0018008 | 6.011773333 | 5.950531579 | 5.925355882 | 6.037995455 |  |  |  |  |  |  |  |  |
| CLEC5A        | ILMN_3045984 | 4.595E-05 | 0.0023644 | 0.9952611 | 0.065168  | 0.0001399 | 0.0058405 | 5.95908     | 5.828018421 | 5.873202941 | 5.958854545 |  |  |  |  |  |  |  |  |
| ZFP704        | ILMN_1225146 | 0.0157979 | 0.0022986 | 0.436168  | 0.4060296 | 0.0051091 | 0.0008179 | 5.9147      | 5.849613158 | 5.828823529 | 5.941309091 |  |  |  |  |  |  |  |  |
| TNS4          | ILMN_1236029 | 0.0447347 | 0.0035216 | 0.6156233 | 0.4066194 | 0.0335541 | 0.0029568 | 5.844593333 | 5.780189474 | 5.758717647 | 5.866986364 |  |  |  |  |  |  |  |  |
| 2310040G07RIK | ILMN_1232245 | 0.0014676 | 0.003644  | 0.9801709 | 0.5338841 | 0.0018196 | 0.0064955 | 5.79773     | 5.696360526 | 5.712151471 | 5.798627273 |  |  |  |  |  |  |  |  |
| KRTAP5-4      | ILMN_2817498 | 0.0118382 | 0.0033168 | 0.7848286 | 0.6047325 | 0.0364951 | 0.0175473 | 5.736486667 | 5.664107895 | 5.651308824 | 5.727004545 |  |  |  |  |  |  |  |  |
| D030051N19RIK | ILMN_2760593 | 0.0176724 | 0.0088324 | 0.7626964 | 0.9526906 | 0.0035265 | 0.0028821 | 8.371213333 | 8.285613158 | 8.287195588 | 8.383390909 |  |  |  |  |  |  |  |  |
| A430043M19RIK | ILMN_2553758 | 0.0153723 | 0.001537  | 0.8701781 | 0.7000002 | 0.0216004 | 0.0037935 | 6.192146667 | 6.116665789 | 6.108377941 | 6.186131818 |  |  |  |  |  |  |  |  |
| 9030025P20RIK | ILMN_2716783 | 0.0255003 | 0.0010439 | 0.910137  | 0.5226017 | 0.0247396 | 0.0013441 | 8.676186667 | 8.607128947 | 8.592552941 | 8.680018182 |  |  |  |  |  |  |  |  |
| GAS7          | ILMN_2924831 | 0.0002814 | 0.0155795 | 0.4890746 | 0.1450892 | 7.41E-05  | 0.0041312 | 6.734093333 | 6.607315789 | 6.6505      | 6.764486364 |  |  |  |  |  |  |  |  |
| TBC1D25       | ILMN_2722583 | 0.0001741 | 0.0006019 | 0.7508305 | 0.1725744 | 0.0003484 | 0.0007655 | 8.04817     | 7.934818421 | 7.965151471 | 8.058922727 |  |  |  |  |  |  |  |  |
| LOC193563     | ILMN_1234524 | 0.0203014 | 0.0021195 | 0.4937336 | 0.3753691 | 0.0098347 | 0.0011714 | 5.841313333 | 5.780481579 | 5.758816176 | 5.863127273 |  |  |  |  |  |  |  |  |
| PAPSS2        | ILMN_2466809 | 0.0007114 | 0.0106323 | 0.5969308 | 0.1975621 | 0.0001305 | 0.0028935 | 6.744143333 | 6.628768421 | 6.661655882 | 6.768309091 |  |  |  |  |  |  |  |  |
| ELL           | ILMN_2751304 | 0.0043874 | 0.0021851 | 0.5671152 | 0.9478309 | 0.034593  | 0.0297732 | 9.71715     | 9.633271053 | 9.634791176 | 9.697881818 |  |  |  |  |  |  |  |  |
| SHKBP1        | ILMN_2734334 | 0.0053095 | 0.0435104 | 0.4581237 | 0.229169  | 0.0001639 | 0.0045941 | 8.369346667 | 8.246628947 | 8.287191176 | 8.407618182 |  |  |  |  |  |  |  |  |
| RNF10         | ILMN_2789888 | 0.0027989 | 0.0004689 | 0.9566584 | 0.9104826 | 0.0098144 | 0.0026066 | 11.53589    | 11.45141053 | 11.45382206 | 11.53415455 |  |  |  |  |  |  |  |  |
| FBXL20        | ILMN_2729097 | 0.0235441 | 0.009027  | 0.9843672 | 0.9957199 | 0.0378707 | 0.0190251 | 7.886646667 | 7.80505     | 7.804917647 | 7.885722727 |  |  |  |  |  |  |  |  |
| TEAD4         | ILMN_3157399 | 0.0141637 | 0.0027862 | 0.9554286 | 0.7134498 | 0.0466475 | 0.0137869 | 6.07582     | 6.003681579 | 5.99445     | 6.073868182 |  |  |  |  |  |  |  |  |
| 5031439G07RIK | ILMN_1252809 | 0.0362145 | 0.0054091 | 0.7584422 | 0.7313907 | 0.0207321 | 0.0032499 | 8.046333333 | 7.975907895 | 7.966855882 | 8.056904545 |  |  |  |  |  |  |  |  |
| LOC100046003  | ILMN_2427178 | 0.0018293 | 0.0012967 | 0.7160404 | 0.9825846 | 0.0336408 | 0.0243578 | 8.814313333 | 8.735331579 | 8.734867647 | 8.801768182 |  |  |  |  |  |  |  |  |
| B130002B06RIK | ILMN_1231100 | 0.002085  | 0.0009077 | 0.6275775 | 0.9155026 | 0.0127637 | 0.0106019 | 5.813043333 | 5.732515789 | 5.7347      | 5.7991      |  |  |  |  |  |  |  |  |
| EPN3          | ILMN_1239908 | 0.0081262 | 0.0018557 | 0.6086819 | 0.7130121 | 0.0408573 | 0.0200886 | 5.787266667 | 5.702681579 | 5.710923529 | 5.770054545 |  |  |  |  |  |  |  |  |
| ZC3H12A       | ILMN_2856095 | 0.023892  | 0.0152977 | 0.1041123 | 0.9579116 | 0.0012163 | 0.0003304 | 8.291086667 | 8.213755263 | 8.215352941 | 8.354177273 |  |  |  |  |  |  |  |  |
| 2900079J23RIK | ILMN_2458967 | 0.000691  | 0.005917  | 0.8841941 | 0.2598759 | 0.0034558 | 0.0218172 | 5.841546667 | 5.736136842 | 5.765825    | 5.837059091 |  |  |  |  |  |  |  |  |
| CLEC4B1       | ILMN_2959372 | 0.004988  | 0.0056659 | 0.1168793 | 0.7320233 | 9.394E-05 | 5.148E-05 | 5.798906667 | 5.716681579 | 5.724957353 | 5.853954545 |  |  |  |  |  |  |  |  |
| 1300010F03RIK | ILMN_2688415 | 0.0111316 | 0.0044511 | 0.6250101 | 0.903061  | 0.041781  | 0.0317985 | 6.837643333 | 6.766381579 | 6.763723529 | 6.82175     |  |  |  |  |  |  |  |  |
| KRT39         | ILMN_2699061 | 0.0002457 | 0.0032069 | 0.6653659 | 0.1639792 | 0.0044085 | 0.0360122 | 5.62461     | 5.520444737 | 5.55114706  | 5.6101      |  |  |  |  |  |  |  |  |
| 4930519F16RIK | ILMN_2812960 | 0.0150436 | 0.0119516 | 0.7117498 | 0.8622955 | 0.0128692 | 0.0100083 | 5.689996667 | 5.611807895 | 5.616554412 | 5.702931818 |  |  |  |  |  |  |  |  |
| RHBD1         | ILMN_2680086 | 0.0019562 | 0.0265314 | 0.7428231 | 0.153613  | 0.0004957 | 0.0125101 | 7.70038     | 7.587589474 | 7.627182353 | 7.714345455 |  |  |  |  |  |  |  |  |
| GDPD1         | ILMN_2683528 | 0.0252047 | 0.014226  | 0.9742184 | 0.976903  | 0.029161  | 0.0218301 | 6.465226667 | 6.393168421 | 6.392429412 | 6.466463636 |  |  |  |  |  |  |  |  |
| ACP2          | ILMN_2513205 | 0.0258929 | 0.0480152 | 0.8783636 | 0.5194416 | 0.0090843 | 0.0298416 | 6.88359     | 6.791065789 | 6.810866176 | 6.8907      |  |  |  |  |  |  |  |  |
| SETD1A        | ILMN_1247099 | 0.029141  | 0.0180293 | 0.2892856 | 0.8016873 | 0.0023861 | 0.0009068 | 9.028223333 | 8.94825     | 8.955577941 | 9.065645455 |  |  |  |  |  |  |  |  |
| OLFR516       | ILMN_2975511 | 0.0058453 | 0.0065686 | 0.6318905 | 0.8480392 | 0.0046306 | 0.0050237 | 5.832843333 | 5.755394737 | 5.760235294 | 5.846913636 |  |  |  |  |  |  |  |  |
| REN1          | ILMN_2620114 | 0.0085901 | 0.0035255 | 0.5194519 | 0.9189352 | 0.0459334 | 0.039878  | 5.670936667 | 5.596518421 | 5.598602941 | 5.650036364 |  |  |  |  |  |  |  |  |
| 5330417C22RIK | ILMN_3160472 | 0.0039298 | 0.0166523 | 0.8183059 | 0.3293711 | 0.0123984 | 0.0286015 | 5.612053333 | 5.612434211 | 5.640252941 | 5.719795455 |  |  |  |  |  |  |  |  |
| AGAP1         | ILMN_3086136 | 0.0013012 | 0.0142837 | 0.2177918 | 0.1437627 | 0.0002803 | 0.000833  | 6.059153333 | 5.948686842 | 5.989294118 | 6.109681818 |  |  |  |  |  |  |  |  |
| DUSP6         | ILMN_2701321 | 0.0419611 | 0.0207727 | 0.6564169 | 0.7667014 | 0.0151341 | 0.0053288 | 5.8376      | 5.760176316 | 5.768070588 | 5.856759091 |  |  |  |  |  |  |  |  |
| CTSL          | ILMN_2904703 | 0.0082365 | 0.0336987 | 0.688531  | 0.394718  | 0.0033249 | 0.0172177 | 5.81264     | 5.718744737 | 5.743730882 | 5.827822727 |  |  |  |  |  |  |  |  |
| SLCO6C1       | ILMN_2672845 | 0.0036617 | 0.0034252 | 0.8298071 | 0.5075665 | 0.0093559 | 0.007347  | 5.686233333 | 5.602471053 | 5.617510294 | 5.693277273 |  |  |  |  |  |  |  |  |
| TBC1D2        | ILMN_3140913 | 0.0091587 | 0.0270787 | 0.0776191 | 0.1161568 | 5.306E-05 | 8.344E-06 | 6.907116667 | 6.793013158 | 6.838802941 | 6.992163636 |  |  |  |  |  |  |  |  |
| OPHN1         | ILMN_1218910 | 0.0070562 | 0.0167606 | 0.9612701 |           |           |           |             |             |             |             |  |  |  |  |  |  |  |  |

|               |              |           |           |           |           |           |           |             |             |             |             |  |  |  |  |  |  |  |  |
|---------------|--------------|-----------|-----------|-----------|-----------|-----------|-----------|-------------|-------------|-------------|-------------|--|--|--|--|--|--|--|--|
| B930048N13RIK | ILMN_1228496 | 0.0258409 | 0.0231931 | 0.9459577 | 0.6860792 | 0.0324665 | 0.0364817 | 5.961773333 | 5.883607895 | 5.894567647 | 5.95935     |  |  |  |  |  |  |  |  |
| MBL1          | ILMN_1238266 | 0.0194917 | 0.0187551 | 0.6216545 | 0.9538341 | 0.0038567 | 0.0070378 | 5.619243333 | 5.55345     | 5.552047059 | 5.635831818 |  |  |  |  |  |  |  |  |
| A730017D01RIK | ILMN_2448591 | 0.0351444 | 0.0250831 | 0.2771874 | 0.9789299 | 0.002874  | 0.0021749 | 6.58584     | 6.519621053 | 6.518897059 | 6.621677273 |  |  |  |  |  |  |  |  |
| SNX33         | ILMN_1212693 | 0.0012835 | 0.035465  | 0.7593182 | 0.0768198 | 0.0017864 | 0.0303962 | 7.0541      | 6.931763158 | 6.987372059 | 7.065340909 |  |  |  |  |  |  |  |  |
| E330023P07RIK | ILMN_1240762 | 0.0403921 | 0.0100513 | 0.9004208 | 0.6995832 | 0.0425864 | 0.0176601 | 5.836216667 | 5.778460526 | 5.770314706 | 5.832118182 |  |  |  |  |  |  |  |  |
| 9330152L17    | ILMN_2726288 | 0.0068496 | 0.0099609 | 0.8218654 | 0.6514086 | 0.003115  | 0.0070201 | 5.81598     | 5.740573684 | 5.750429412 | 5.823040909 |  |  |  |  |  |  |  |  |
| PCDH19        | ILMN_2696829 | 0.0097893 | 0.0131131 | 0.972637  | 0.9702742 | 0.0157433 | 0.0250866 | 5.694973333 | 5.629565789 | 5.630432353 | 5.695972727 |  |  |  |  |  |  |  |  |
| CAGE1         | ILMN_2861743 | 0.0002703 | 0.0145488 | 0.7809247 | 0.0671697 | 0.0006313 | 0.0159241 | 5.926       | 5.816742105 | 5.861688235 | 5.935345455 |  |  |  |  |  |  |  |  |
| TMEM56        | ILMN_2966162 | 0.0462108 | 0.0184806 | 0.4105332 | 0.6403937 | 0.0091299 | 0.0038463 | 5.612496667 | 5.559673684 | 5.548541176 | 5.640304545 |  |  |  |  |  |  |  |  |
| ACTR3B        | ILMN_2933346 | 0.0245032 | 0.0282414 | 0.8984635 | 0.8932447 | 0.0154677 | 0.0280153 | 6.533076667 | 6.4662      | 6.469547059 | 6.5374      |  |  |  |  |  |  |  |  |
| ADAM11        | ILMN_2629383 | 0.0026248 | 0.0095577 | 0.9602058 | 0.3205222 | 0.0136472 | 0.0338978 | 5.691363333 | 5.605971053 | 5.628829412 | 5.689736364 |  |  |  |  |  |  |  |  |
| CD151         | ILMN_2836710 | 0.0193575 | 0.0252142 | 0.9583206 | 0.5738569 | 0.027328  | 0.0420257 | 8.090336667 | 8.015257895 | 8.028898529 | 8.088440909 |  |  |  |  |  |  |  |  |
| A930014P08RIK | ILMN_1258114 | 0.0165319 | 0.0226352 | 0.7989225 | 0.9591495 | 0.0202646 | 0.0296379 | 5.6155      | 5.55547368  | 5.554239706 | 5.621622727 |  |  |  |  |  |  |  |  |
| SLC35E4       | ILMN_1225229 | 0.0120001 | 0.0364782 | 0.2142271 | 0.5822929 | 0.0006084 | 0.0021022 | 5.867336667 | 5.791586842 | 5.806241176 | 5.91005     |  |  |  |  |  |  |  |  |
| PAR3B         | ILMN_2860656 | 0.0221362 | 0.0242476 | 0.7871277 | 0.357316  | 0.0180473 | 0.0146645 | 5.96533     | 5.880542105 | 5.904663235 | 5.975636364 |  |  |  |  |  |  |  |  |
| OLFR586       | ILMN_2600115 | 0.0262931 | 0.0300541 | 0.4454466 | 0.5125899 | 0.0112671 | 0.0074731 | 5.601076667 | 5.522747368 | 5.541236765 | 5.627940909 |  |  |  |  |  |  |  |  |
| D030072B18RIK | ILMN_2611773 | 0.0121881 | 0.0138297 | 0.7042    | 0.5520373 | 0.0048147 | 0.0055113 | 5.61957     | 5.547055263 | 5.559957353 | 5.631459091 |  |  |  |  |  |  |  |  |
| STAR3         | ILMN_2769734 | 0.0325095 | 0.0437294 | 0.7159143 | 0.6153939 | 0.0263459 | 0.0293263 | 8.494313333 | 8.422068421 | 8.435257353 | 8.509754545 |  |  |  |  |  |  |  |  |
| SFXN3         | ILMN_1216734 | 0.0084465 | 0.0369416 | 0.3332499 | 0.4315651 | 0.0004631 | 0.0027125 | 6.08399     | 6.006510526 | 6.025077941 | 6.121263636 |  |  |  |  |  |  |  |  |
| 6430511F03    | ILMN_2420209 | 0.0105929 | 0.0296337 | 0.595619  | 0.682983  | 0.0051195 | 0.014191  | 6.304863333 | 6.2371      | 6.246623529 | 6.322872727 |  |  |  |  |  |  |  |  |
| PROM          | ILMN_1238150 | 0.0039862 | 0.0081546 | 0.4662896 | 0.4395203 | 0.0006049 | 0.0010628 | 5.928333333 | 5.855444737 | 5.870188235 | 5.950177273 |  |  |  |  |  |  |  |  |
| NTE           | ILMN_2777668 | 0.0022045 | 0.0233767 | 0.8255128 | 0.1273946 | 0.0009399 | 0.014351  | 8.366106667 | 8.27475     | 8.3088      | 8.373113636 |  |  |  |  |  |  |  |  |
| OLFR150       | ILMN_2541702 | 0.0205861 | 0.0086368 | 0.8151015 | 0.7718418 | 0.0358411 | 0.0222281 | 5.682813333 | 5.620110526 | 5.625554412 | 5.675772727 |  |  |  |  |  |  |  |  |
| 2010001M09RIK | ILMN_2613601 | 0.0120013 | 0.0226729 | 0.063086  | 0.3826246 | 1.211E-05 | 6.331E-06 | 13.25162667 | 13.17815526 | 13.19607647 | 13.31843636 |  |  |  |  |  |  |  |  |
| KCNC4         | ILMN_2771095 | 0.0157139 | 0.0423165 | 0.5244547 | 0.4022856 | 0.000772  | 0.0045142 | 5.88774     | 5.814560526 | 5.832483824 | 5.911813636 |  |  |  |  |  |  |  |  |
| GM498         | ILMN_1247100 | 0.0436667 | 0.0088286 | 0.4972216 | 0.7028412 | 0.0293635 | 0.0052678 | 5.727336667 | 5.681271053 | 5.673501471 | 5.744981818 |  |  |  |  |  |  |  |  |
| LOC327767     | ILMN_2533815 | 0.0075878 | 0.0370241 | 0.3781781 | 0.3051498 | 0.002516  | 0.0069701 | 6.031383333 | 5.952915789 | 5.978073529 | 6.061031818 |  |  |  |  |  |  |  |  |
| B930097H17RIK | ILMN_2573844 | 0.0026075 | 0.0250972 | 0.4526146 | 0.1224496 | 0.0007489 | 0.0049604 | 5.844733333 | 5.755813158 | 5.792060294 | 5.865090909 |  |  |  |  |  |  |  |  |
| BMP3          | ILMN_1235433 | 0.0246822 | 0.0485117 | 0.5437379 | 0.9290625 | 0.0197826 | 0.0285056 | 5.675396667 | 5.620692105 | 5.622867647 | 5.694827273 |  |  |  |  |  |  |  |  |
| PLEKHB2       | ILMN_2731769 | 0.001378  | 0.0287559 | 0.9350244 | 0.0991679 | 0.0013793 | 0.0451558 | 9.05776     | 8.97335     | 9.006016176 | 9.055263636 |  |  |  |  |  |  |  |  |
| A630038P11RIK | ILMN_1233452 | 0.0113427 | 0.0430203 | 0.6978785 | 0.5092482 | 0.004887  | 0.0239387 | 5.602433333 | 5.537278947 | 5.551530882 | 5.614654545 |  |  |  |  |  |  |  |  |
| 6720480F11RIK | ILMN_1255586 | 0.0342299 | 0.0372474 | 0.8391307 | 0.5635111 | 0.0405714 | 0.0386927 | 5.689046667 | 5.629671053 | 5.641458824 | 5.696195455 |  |  |  |  |  |  |  |  |
| CNTNAP3       | ILMN_1219653 | 0.0337739 | 0.0448523 | 0.2011159 | 0.6359243 | 0.0030471 | 0.002119  | 5.841703333 | 5.786078947 | 5.796410294 | 5.878831818 |  |  |  |  |  |  |  |  |
